# Supplementary material for: Mechanistic insight into the selective catalytic reduction of NOx with propene on the Ce0.875Zr0.125O2 (110) surface
Source: Royal Society of Chemistry journal article supplement (doi:10.1039/d2cy00381c), 2022-01-01
Supplement: d2cy00381c1.pdf [file d2cy00381c1.pdf]

## Supplementary information for

### “Mechanistic insight into the selective catalytic reduction of NO<sub>x</sub> with propene on the Ce<sub>0.875</sub>Zr<sub>0.125</sub>O<sub>2</sub> (110) surface”

Xuesong Cao<sup>a</sup>, Chenxi Zhang<sup>a,b</sup>, Fengshuo Dong<sup>a</sup>, Xiaomin Sun<sup>a\*</sup>

<sup>a</sup>Environment Research Institute, Shandong University, Qingdao 266200, P.R.China

<sup>b</sup>College of Biological and Environmental Engineering, Binzhou University, Binzhou 256600, P.R.China

Supporting Information list:

**Table S1** Surface formation energies of CeO<sub>2</sub> (110) surface for different size of supercell.

**Fig. S1** Schematic structure models for the Ce<sub>0.875</sub>Zr<sub>0.125</sub>O<sub>2</sub> (110) surface: (a) side view and (b) top view. Key: Ce, ivory; Zr, cyan; O, red.

**Table S2** The bond distances for O<sub>2</sub>, NO, N<sub>2</sub>, and CO<sub>2</sub> molecules.

**Table S3** Adsorption energies ( $E_{\text{ads}}$ ) for NO and NO<sub>3</sub> gas molecules on the possible adsorption sites of Ce<sub>0.875</sub>Zr<sub>0.125</sub>O<sub>2</sub> (110) surface.

**Fig. S2** The deformation electron density for adsorption geometries of (a) NO on Ce<sub>T</sub> site, (b) NO on Zr<sub>T</sub> site, (c) NO on O<sub>T1</sub> site, (d) NO on O<sub>T2</sub> site, (e) NO<sub>3</sub> on brid<sub>1</sub> site, (f) NO<sub>3</sub> on brid<sub>2</sub> site, (g) NO<sub>3</sub> on biden site, and (h) NO<sub>3</sub> on monoden site.

**Fig. S3** Optimized adsorption configurations of (a) C<sub>sp3</sub>-H of C<sub>3</sub>H<sub>6</sub> on O<sub>T</sub> site, (b) C<sub>sp3</sub>-H of C<sub>3</sub>H<sub>6</sub> on Ce<sub>T</sub> site, (c) C<sub>sp3</sub>-H of C<sub>3</sub>H<sub>6</sub> on Zr<sub>T</sub> site, (d) C<sub>sp2</sub>-H of C<sub>3</sub>H<sub>6</sub> on O<sub>T</sub> site, (e) C<sub>sp2</sub>-H of C<sub>3</sub>H<sub>6</sub> on Ce<sub>T</sub> site, (f) C<sub>sp2</sub>-H of C<sub>3</sub>H<sub>6</sub> on Zr<sub>T</sub> site, (g) C=C of C<sub>3</sub>H<sub>6</sub> on O<sub>T</sub> site, (h) C=C of C<sub>3</sub>H<sub>6</sub> on Ce<sub>T</sub> site, and (i) C=C of C<sub>3</sub>H<sub>6</sub> on Zr<sub>T</sub> site. Key: C, gray; H, white.

**Fig. S4** Energy profile and corresponding optimized configurations of C<sub>3</sub>H<sub>6</sub> oxidation from C<sub>sp2</sub>-H site on the Ce<sub>0.875</sub>Zr<sub>0.125</sub>O<sub>2</sub> (110) surface. Key: C, gray; H, white.

**Fig. S5** Energy profile and corresponding optimized configurations of C<sub>3</sub>H<sub>6</sub> oxidation from C=C site on the Ce<sub>0.875</sub>Zr<sub>0.125</sub>O<sub>2</sub> (110) surface.

**Fig. S6** Energy profiles of C<sub>3</sub>H<sub>6</sub> oxidation on the Ce<sub>0.875</sub>Zr<sub>0.125</sub>O<sub>2</sub> (110) surface.

**Fig. S7** Energy profile and corresponding optimized configurations of acryloyl oxidation on the Ce<sub>0.875</sub>Zr<sub>0.125</sub>O<sub>2</sub> (110) surface.

**Fig. S8** Energy profile and corresponding optimized configurations of NO<sub>2</sub>\* and CH<sub>2</sub>=CHCO\* reaction on the Ce<sub>0.875</sub>Zr<sub>0.125</sub>O<sub>2</sub> (110) surface.

**Table S4** Cartesian coordinates for all the optimized geometries of reactants, transition states and products.

Convergence test for size of supercell of CeO<sub>2</sub> is performed (Table S1), the surface formation energy ( $E_{\text{surf}}$ ) of 2 × 2 supercell is the same as 3 × 2, 2 × 3, and 3 × 3 supercell.  $E_{\text{surf}}$  is calculated by the following formula:  $E_{\text{surf}} = (E_{\text{slab}} - n E_{\text{bulk}}) / 2A_{\text{slab}}$ , where  $E_{\text{slab}}$  is the energy of surface,  $E_{\text{bulk}}$  is the energy of optimized bulk,  $A_{\text{slab}}$  is the area of surface and  $n$  is the number of atoms in the optimized bulk cell. To save computing resources, 2 × 2 supercell is selected to build Ce<sub>0.875</sub>Zr<sub>0.125</sub>O<sub>2</sub> (110) surface.

**Table S1** Surface formation energies of CeO<sub>2</sub> (110) surface for different size of supercell.

| Size of supercell                                        | 2 × 2  | 3 × 2  | 2 × 3  | 3 × 3  |
|----------------------------------------------------------|--------|--------|--------|--------|
| Surface energy (kcal mol <sup>-1</sup> Å <sup>-2</sup> ) | 0.0029 | 0.0029 | 0.0029 | 0.0029 |

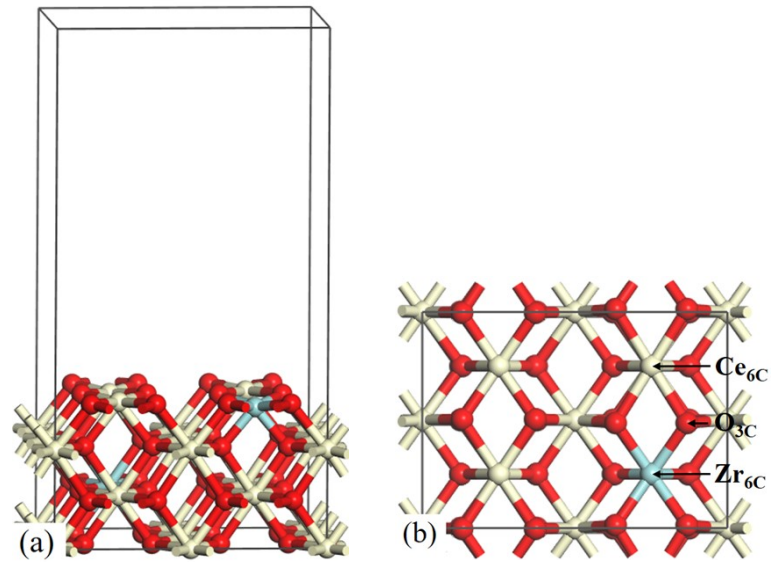

**Fig. S1** Schematic structure models for the  $\text{Ce}_{0.875}\text{Zr}_{0.125}\text{O}_2$  (110) surface: (a) side view and (b) top view. Key: Ce, ivory; Zr, cyan; O, red.

**Table S2** The bond distances for O<sub>2</sub>, NO, N<sub>2</sub>, and CO<sub>2</sub> molecules.

| Molecule               | O <sub>2</sub> | NO    | N <sub>2</sub> | CO <sub>2</sub> |
|------------------------|----------------|-------|----------------|-----------------|
| Calculated value (Å)   | 1.225          | 1.164 | 1.107          | 1.177           |
| Experimental value (Å) | 1.207          | 1.151 | 1.098          | 1.160           |

**Table S3** Adsorption energies ( $E_{\text{ads}}$ ) for NO and NO<sub>3</sub> gas molecules on the possible adsorption sites of Ce<sub>0.875</sub>Zr<sub>0.125</sub>O<sub>2</sub> (110) surface.

| Gas Molecule    | Adsorption Sites  | $E_{\text{ads}}$ (kcal/mol) | Figure |
|-----------------|-------------------|-----------------------------|--------|
| NO              | Ce <sub>T</sub>   | -2.77                       | 1(a)   |
|                 | Zr <sub>T</sub>   | -3.68                       | 1(b)   |
|                 | O <sub>T1</sub>   | -21.18                      | 1(c)   |
|                 | O <sub>T2</sub>   | -40.59                      | 1(d)   |
| NO <sub>3</sub> | brid <sub>1</sub> | -40.84                      | 1(e)   |
|                 | brid <sub>2</sub> | -40.84                      | 1(f)   |
|                 | biden             | -39.20                      | 1(g)   |
|                 | monoden           | -36.13                      | 1(h)   |

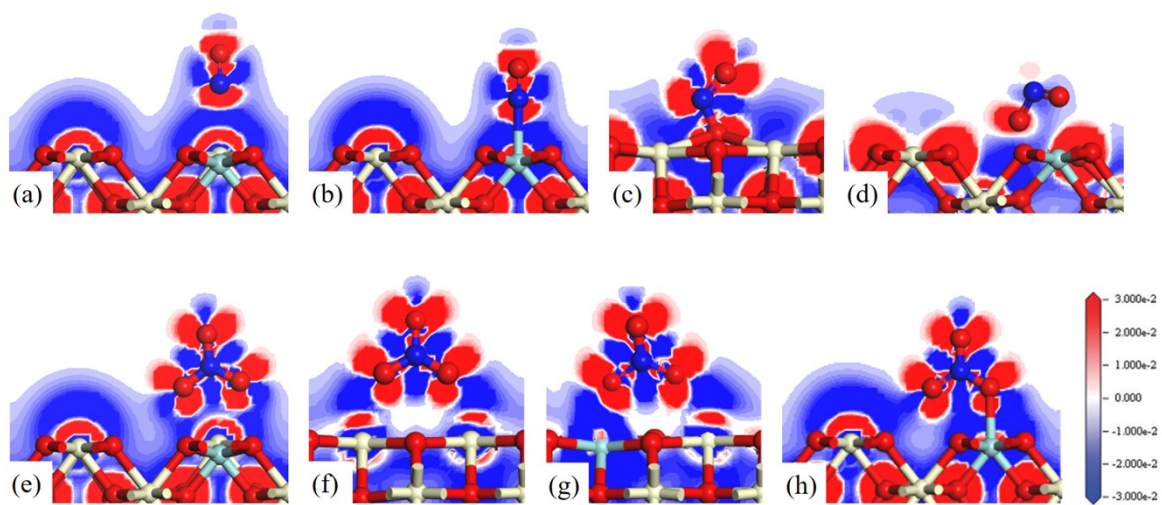

**Fig. S2** The deformation electron density for adsorption geometries of (a) NO on Ce<sub>T</sub> site, (b) NO on Zr<sub>T</sub> site, (c) NO on O<sub>T1</sub> site, (d) NO on O<sub>T2</sub> site, (e) NO<sub>3</sub> on brid<sub>1</sub> site, (f) NO<sub>3</sub> on brid<sub>2</sub> site, (g) NO<sub>3</sub> on biden site, and (h) NO<sub>3</sub> on monoden site.

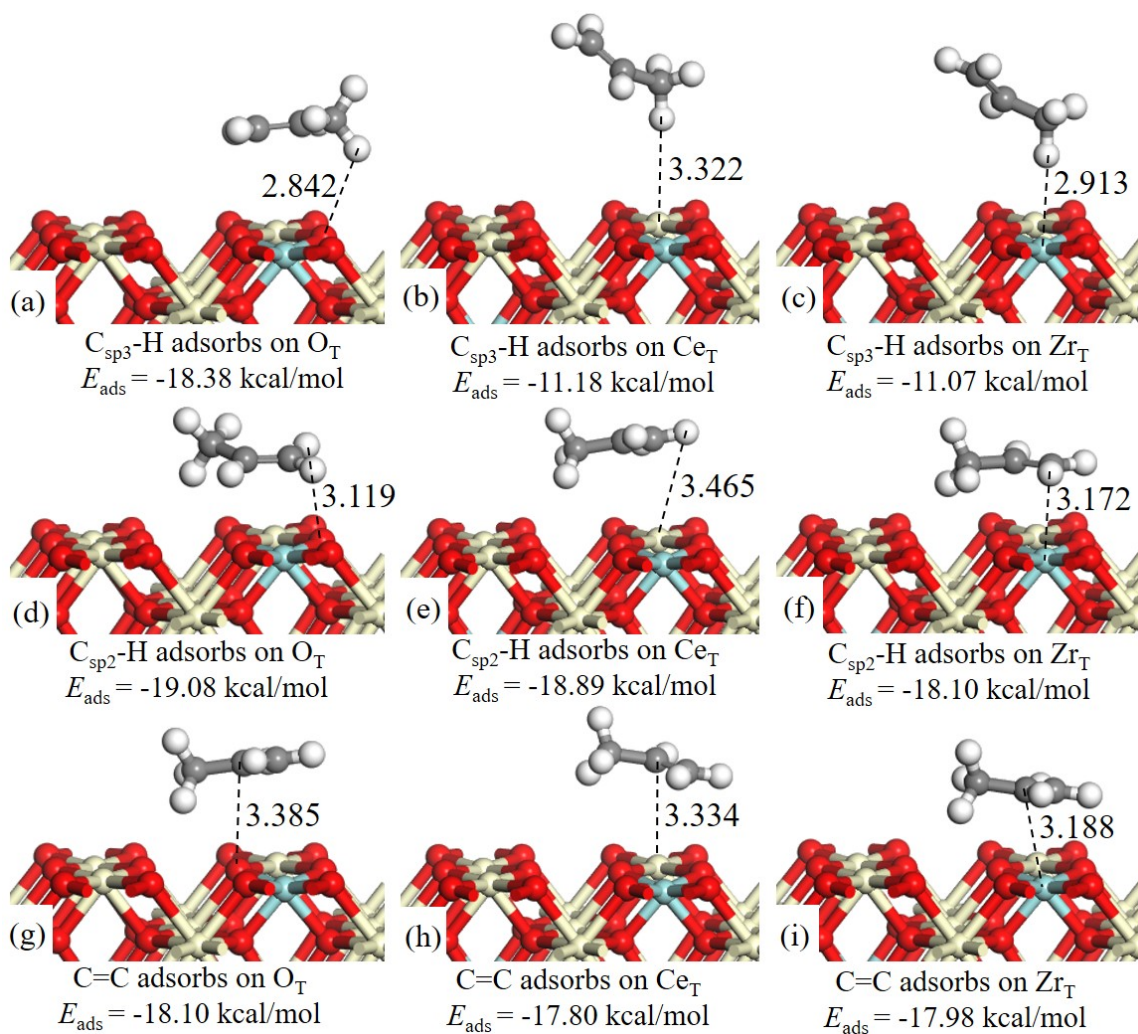

**Fig. S3** Optimized adsorption configurations of (a)  $C_{sp^3}\text{-H}$  of  $C_3H_6$  on  $O_T$  site, (b)  $C_{sp^3}\text{-H}$  of  $C_3H_6$  on  $Ce_T$  site, (c)  $C_{sp^3}\text{-H}$  of  $C_3H_6$  on  $Zr_T$  site, (d)  $C_{sp^2}\text{-H}$  of  $C_3H_6$  on  $O_T$  site, (e)  $C_{sp^2}\text{-H}$  of  $C_3H_6$  on  $Ce_T$  site, (f)  $C_{sp^2}\text{-H}$  of  $C_3H_6$  on  $Zr_T$  site, (g)  $C=C$  of  $C_3H_6$  on  $O_T$  site, (h)  $C=C$  of  $C_3H_6$  on  $Ce_T$  site, and (i)  $C=C$  of  $C_3H_6$  on  $Zr_T$  site. Key: C, gray; H, white.

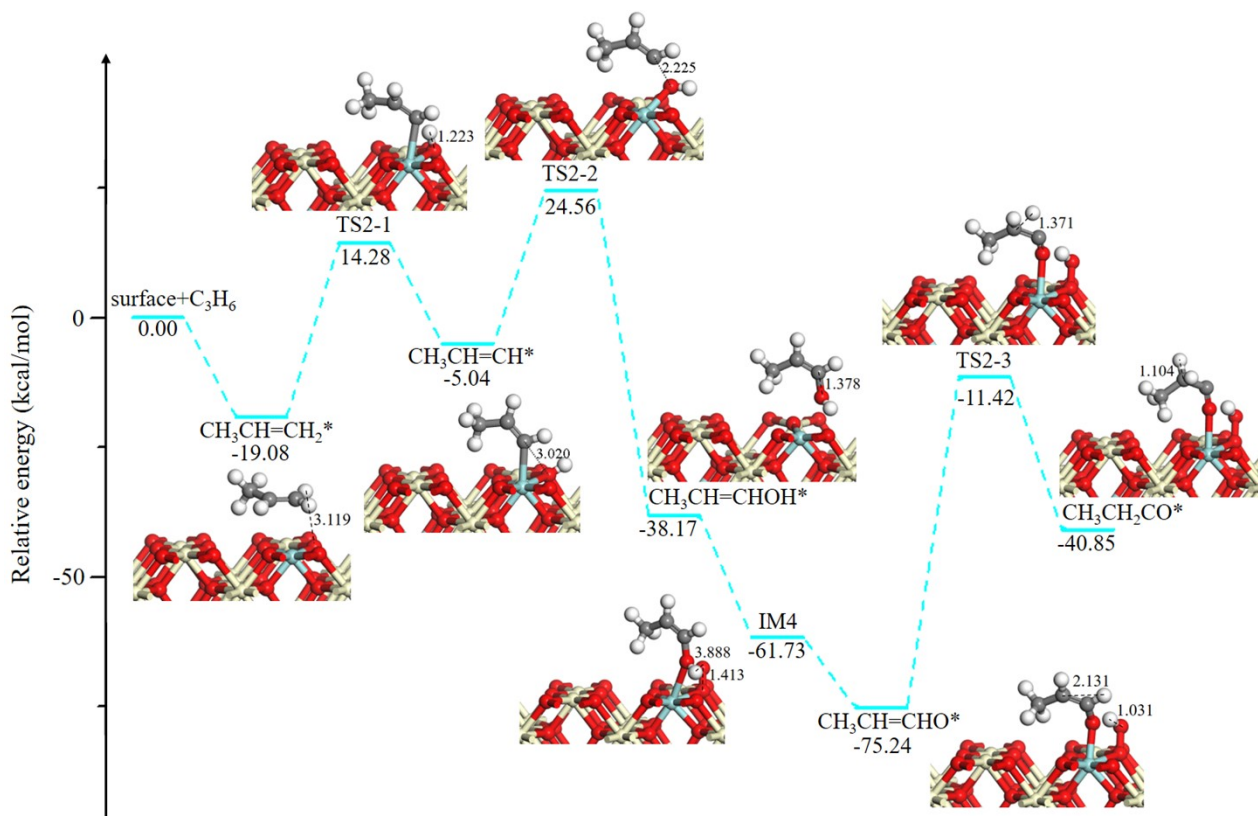

**Fig. S4** Energy profile and corresponding optimized configurations of C<sub>3</sub>H<sub>6</sub> oxidation from C<sub>sp<sup>2</sup></sub>-H site on the Ce<sub>0.875</sub>Zr<sub>0.125</sub>O<sub>2</sub> (110) surface.



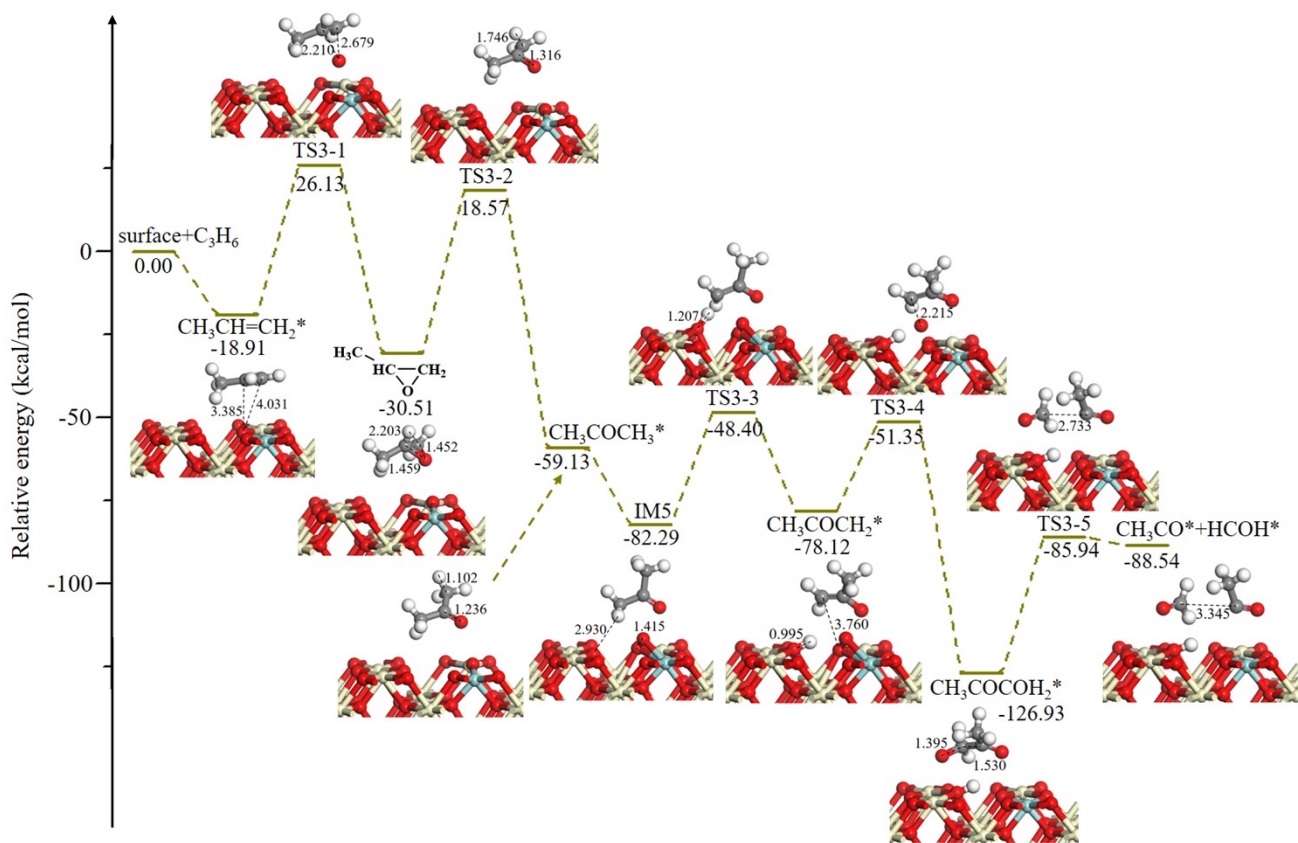

**Fig. S5** Energy profile and corresponding optimized configurations of  $C_3H_6$  oxidation from C=C site on the  $Ce_{0.875}Zr_{0.125}O_2$  (110) surface.

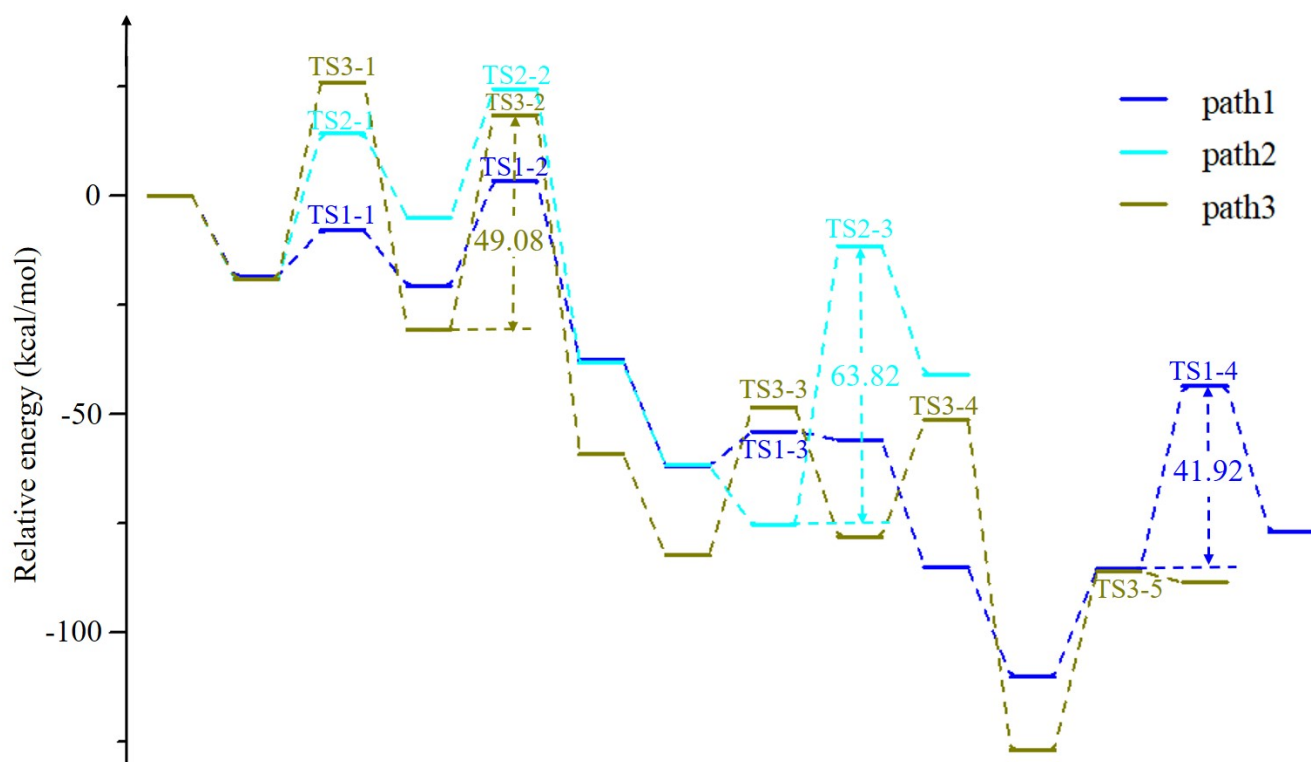

Fig. S6 Energy profiles of C<sub>3</sub>H<sub>6</sub> oxidation on the Ce<sub>0.875</sub>Zr<sub>0.125</sub>O<sub>2</sub> (110) surface.

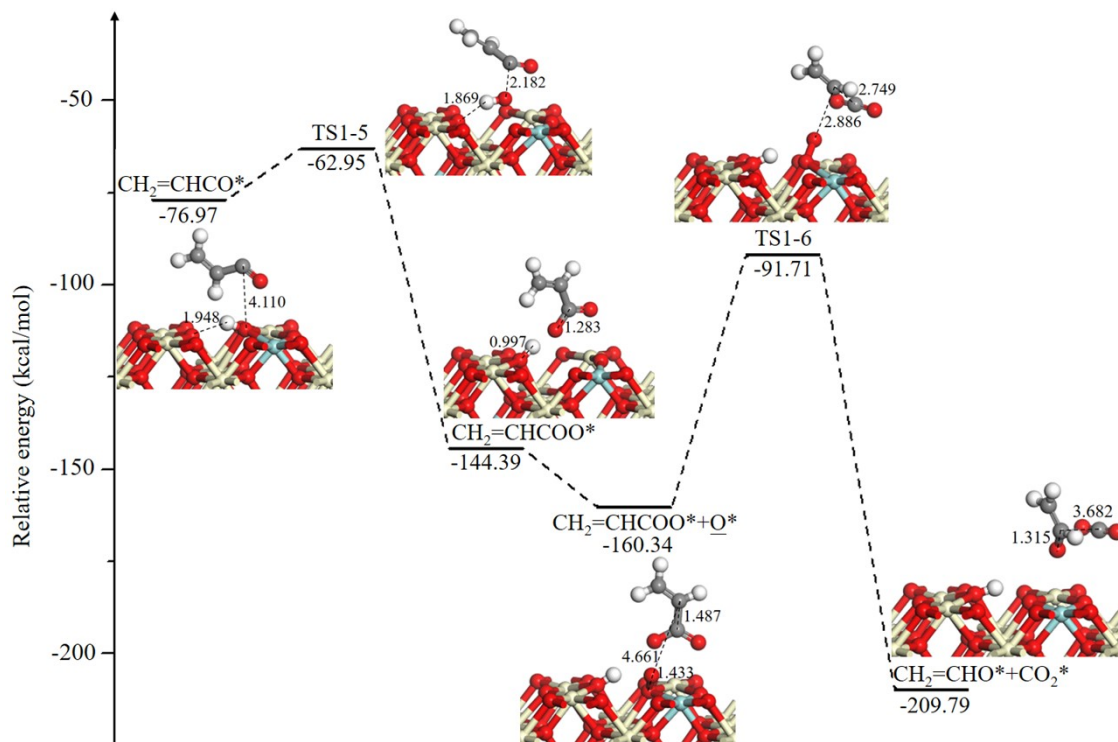

**Fig. S7** Energy profile and corresponding optimized configurations of acryloyl oxidation on the  $\text{Ce}_{0.875}\text{Zr}_{0.125}\text{O}_2$  (110) surface.

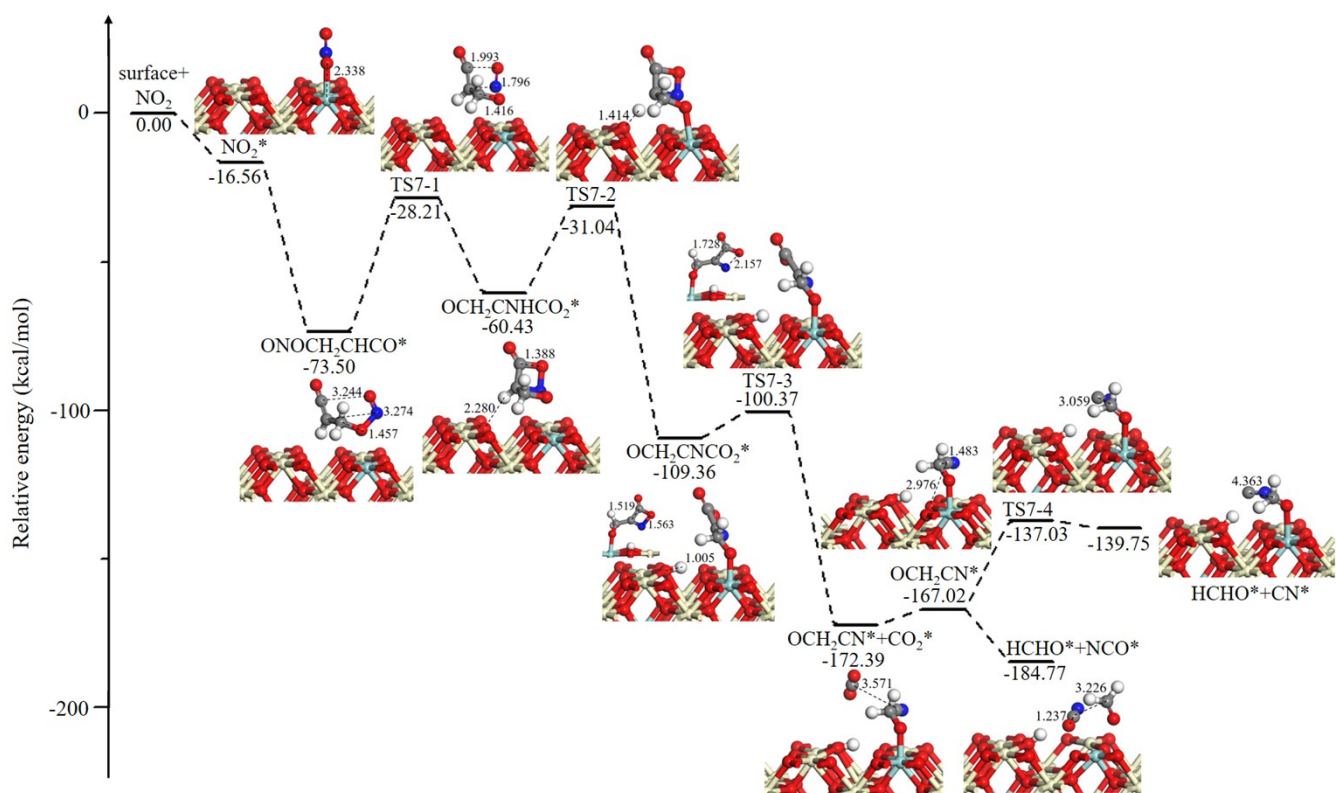

**Fig. S8** Energy profile and corresponding optimized configurations of NO<sub>2</sub>\* and CH<sub>2</sub>=CHCO\* reaction on the Ce<sub>0.875</sub>Zr<sub>0.125</sub>O<sub>2</sub> (110) surface.

**Table S4** Cartesian coordinates for all the optimized geometries of reactants, transition states and products.

| <b>Ce<sub>0.875</sub>Zr<sub>0.125</sub>O<sub>2</sub> (110) surface</b> |    |               |               |               |
|------------------------------------------------------------------------|----|---------------|---------------|---------------|
| ATOM                                                                   |    | X (Angstroms) | Y (Angstroms) | Z (Angstroms) |
| 1                                                                      | O  | 1.352750      | 0.000000      | 1.913077      |
| 2                                                                      | O  | 1.411734      | -0.028586     | 5.770129      |
| 3                                                                      | O  | 4.058250      | 1.913077      | 0.000000      |
| 4                                                                      | O  | 4.063301      | 1.913079      | 3.895275      |
| 5                                                                      | O  | 4.058250      | 0.000000      | 1.913077      |
| 6                                                                      | O  | 3.999266      | -0.028586     | 5.770129      |
| 7                                                                      | O  | 1.352750      | 1.913077      | 0.000000      |
| 8                                                                      | O  | 1.347699      | 1.913079      | 3.895275      |
| 9                                                                      | Ce | 0.000000      | 0.000000      | 0.000000      |
| 10                                                                     | Ce | -0.004514     | 0.000025      | 3.948453      |
| 11                                                                     | Ce | 2.705500      | 1.913077      | 1.913077      |
| 12                                                                     | Ce | 2.705500      | 1.913128      | 5.659458      |
| 13                                                                     | O  | 6.763750      | 0.000000      | 1.913077      |
| 14                                                                     | O  | 6.855993      | 0.102732      | 5.760344      |
| 15                                                                     | O  | 9.469250      | 1.913077      | 0.000000      |
| 16                                                                     | O  | 9.431712      | 1.913071      | 3.851941      |
| 17                                                                     | O  | 9.469250      | 0.000000      | 1.913077      |
| 18                                                                     | O  | 9.377007      | 0.102733      | 5.760344      |
| 19                                                                     | O  | 6.763750      | 1.913077      | 0.000000      |
| 20                                                                     | O  | 6.801287      | 1.913070      | 3.851940      |
| 21                                                                     | Ce | 5.411000      | 0.000000      | 0.000000      |
| 22                                                                     | Ce | 5.415514      | 0.000025      | 3.948453      |
| 23                                                                     | Ce | 8.116500      | 1.913077      | 1.913077      |
| 24                                                                     | Zr | 8.116500      | 1.913950      | 5.431412      |
| 25                                                                     | O  | 1.352750      | 3.826155      | 1.913077      |
| 26                                                                     | O  | 1.411777      | 3.854803      | 5.770184      |
| 27                                                                     | O  | 4.058250      | 5.739232      | 0.000000      |
| 28                                                                     | O  | 4.004600      | 5.739230      | 3.742568      |
| 29                                                                     | O  | 4.058250      | 3.826155      | 1.913077      |
| 30                                                                     | O  | 3.999223      | 3.854803      | 5.770184      |
| 31                                                                     | O  | 1.352750      | 5.739232      | 0.000000      |
| 32                                                                     | O  | 1.406400      | 5.739229      | 3.742568      |
| 33                                                                     | Ce | 0.000000      | 3.826155      | 0.000000      |
| 34                                                                     | Ce | -0.004651     | 3.826114      | 3.948509      |
| 35                                                                     | Zr | 2.705500      | 5.739232      | 1.913077      |
| 36                                                                     | Ce | 2.705500      | 5.739211      | 5.595430      |
| 37                                                                     | O  | 6.763750      | 3.826155      | 1.913077      |
| 38                                                                     | O  | 6.855208      | 3.723386      | 5.761023      |
| 39                                                                     | O  | 9.469250      | 5.739232      | 0.000000      |
| 40                                                                     | O  | 9.472064      | 5.739172      | 3.928675      |
| 41                                                                     | O  | 9.469250      | 3.826155      | 1.913077      |
| 42                                                                     | O  | 9.377791      | 3.723386      | 5.761024      |
| 43                                                                     | O  | 6.763750      | 5.739232      | 0.000000      |
| 44                                                                     | O  | 6.760936      | 5.739172      | 3.928675      |
| 45                                                                     | Ce | 5.411000      | 3.826155      | 0.000000      |
| 46                                                                     | Ce | 5.415651      | 3.826114      | 3.948509      |
| 47                                                                     | Ce | 8.116500      | 5.739232      | 1.913077      |
| 48                                                                     | Ce | 8.116500      | 5.739836      | 5.682187      |

**NO adsorbes on Ce<sub>T</sub> site of Ce<sub>0.875</sub>Zr<sub>0.125</sub>O<sub>2</sub> (110) surface**

| ATOM |   | X (Angstroms) | Y (Angstroms) | Z (Angstroms) |
|------|---|---------------|---------------|---------------|
| 1    | O | 1.352750      | 0.000000      | 1.913077      |
| 2    | O | 1.412024      | -0.028368     | 5.770688      |
| 3    | O | 4.058250      | 1.913077      | 0.000000      |
| 4    | O | 4.062600      | 1.912994      | 3.894477      |

|    |    |           |           |          |
|----|----|-----------|-----------|----------|
| 5  | O  | 4.058250  | 0.000000  | 1.913077 |
| 6  | O  | 3.998976  | -0.028369 | 5.770687 |
| 7  | O  | 1.352750  | 1.913077  | 0.000000 |
| 8  | O  | 1.348399  | 1.912993  | 3.894477 |
| 9  | Ce | 0.000000  | 0.000000  | 0.000000 |
| 10 | Ce | -0.006239 | -0.000833 | 3.948713 |
| 11 | Ce | 2.705500  | 1.913077  | 1.913077 |
| 12 | Ce | 2.705500  | 1.913152  | 5.658926 |
| 13 | O  | 6.763750  | 0.000000  | 1.913077 |
| 14 | O  | 6.853887  | 0.113051  | 5.758246 |
| 15 | O  | 9.469250  | 1.913077  | 0.000000 |
| 16 | O  | 9.431504  | 1.913155  | 3.846008 |
| 17 | O  | 9.469250  | 0.000000  | 1.913077 |
| 18 | O  | 9.379113  | 0.113051  | 5.758246 |
| 19 | O  | 6.763750  | 1.913077  | 0.000000 |
| 20 | O  | 6.801496  | 1.913155  | 3.846008 |
| 21 | Ce | 5.411000  | 0.000000  | 0.000000 |
| 22 | Ce | 5.417239  | -0.000835 | 3.948713 |
| 23 | Ce | 8.116500  | 1.913077  | 1.913077 |
| 24 | Zr | 8.116500  | 1.915352  | 5.429538 |
| 25 | O  | 1.352750  | 3.826155  | 1.913077 |
| 26 | O  | 1.412142  | 3.854436  | 5.770673 |
| 27 | O  | 4.058250  | 5.739232  | 0.000000 |
| 28 | O  | 4.002595  | 5.739260  | 3.741742 |
| 29 | O  | 4.058250  | 3.826155  | 1.913077 |
| 30 | O  | 3.998857  | 3.854436  | 5.770673 |
| 31 | O  | 1.352750  | 5.739232  | 0.000000 |
| 32 | O  | 1.408406  | 5.739260  | 3.741743 |
| 33 | Ce | 0.000000  | 3.826155  | 0.000000 |
| 34 | Ce | -0.006649 | 3.826968  | 3.948925 |
| 35 | Zr | 2.705500  | 5.739232  | 1.913077 |
| 36 | Ce | 2.705500  | 5.739076  | 5.595070 |
| 37 | O  | 6.763750  | 3.826155  | 1.913077 |
| 38 | O  | 6.853958  | 3.713868  | 5.758232 |
| 39 | O  | 9.469250  | 5.739232  | 0.000000 |
| 40 | O  | 9.477247  | 5.739273  | 3.925493 |
| 41 | O  | 9.469250  | 3.826155  | 1.913077 |
| 42 | O  | 9.379042  | 3.713868  | 5.758232 |
| 43 | O  | 6.763750  | 5.739232  | 0.000000 |
| 44 | O  | 6.755754  | 5.739273  | 3.925493 |
| 45 | Ce | 5.411000  | 3.826155  | 0.000000 |
| 46 | Ce | 5.417649  | 3.826967  | 3.948925 |
| 47 | Ce | 8.116500  | 5.739232  | 1.913077 |
| 48 | Ce | 8.116500  | 5.739861  | 5.700264 |
| 49 | N  | 8.116500  | 5.939259  | 8.498269 |
| 50 | O  | 8.116501  | 6.064221  | 9.654957 |

**NO adsorbes on Zr<sub>T</sub> site of Ce<sub>0.875</sub>Zr<sub>0.125</sub>O<sub>2</sub> (110) surface**

| ATOM |    | X (Angstroms) | Y (Angstroms) | Z (Angstroms) |
|------|----|---------------|---------------|---------------|
| 1    | O  | 1.352750      | 0.000000      | 1.913077      |
| 2    | O  | 1.411988      | -0.027333     | 5.770701      |
| 3    | O  | 4.058250      | 1.913077      | 0.000000      |
| 4    | O  | 4.060342      | 1.913078      | 3.892623      |
| 5    | O  | 4.058250      | 0.000000      | 1.913077      |
| 6    | O  | 3.999012      | -0.027333     | 5.770700      |
| 7    | O  | 1.352750      | 1.913077      | 0.000000      |
| 8    | O  | 1.350658      | 1.913077      | 3.892623      |
| 9    | Ce | 0.000000      | 0.000000      | 0.000000      |

|    |    |           |          |          |
|----|----|-----------|----------|----------|
| 10 | Ce | -0.003264 | 0.001993 | 3.944511 |
| 11 | Ce | 2.705500  | 1.913077 | 1.913077 |
| 12 | Ce | 2.705500  | 1.913079 | 5.658713 |
| 13 | O  | 6.763750  | 0.000000 | 1.913077 |
| 14 | O  | 6.853026  | 0.085058 | 5.752377 |
| 15 | O  | 9.469250  | 1.913077 | 0.000000 |
| 16 | O  | 9.435563  | 1.913078 | 3.857199 |
| 17 | O  | 9.469250  | 0.000000 | 1.913077 |
| 18 | O  | 9.379974  | 0.085058 | 5.752377 |
| 19 | O  | 6.763750  | 1.913077 | 0.000000 |
| 20 | O  | 6.797437  | 1.913078 | 3.857199 |
| 21 | Ce | 5.411000  | 0.000000 | 0.000000 |
| 22 | Ce | 5.414264  | 0.001993 | 3.944511 |
| 23 | Ce | 8.116500  | 1.913077 | 1.913077 |
| 24 | Zr | 8.116500  | 1.913079 | 5.454199 |
| 25 | O  | 1.352750  | 3.826155 | 1.913077 |
| 26 | O  | 1.411988  | 3.853489 | 5.770700 |
| 27 | O  | 4.058250  | 5.739232 | 0.000000 |
| 28 | O  | 4.002885  | 5.739228 | 3.741110 |
| 29 | O  | 4.058250  | 3.826155 | 1.913077 |
| 30 | O  | 3.999012  | 3.853489 | 5.770700 |
| 31 | O  | 1.352750  | 5.739232 | 0.000000 |
| 32 | O  | 1.408114  | 5.739228 | 3.741110 |
| 33 | Ce | 0.000000  | 3.826155 | 0.000000 |
| 34 | Ce | -0.003264 | 3.824162 | 3.944509 |
| 35 | Zr | 2.705500  | 5.739232 | 1.913077 |
| 36 | Ce | 2.705500  | 5.739228 | 5.593997 |
| 37 | O  | 6.763750  | 3.826155 | 1.913077 |
| 38 | O  | 6.853026  | 3.741098 | 5.752376 |
| 39 | O  | 9.469250  | 5.739232 | 0.000000 |
| 40 | O  | 9.473253  | 5.739229 | 3.916545 |
| 41 | O  | 9.469250  | 3.826155 | 1.913077 |
| 42 | O  | 9.379974  | 3.741098 | 5.752376 |
| 43 | O  | 6.763750  | 5.739232 | 0.000000 |
| 44 | O  | 6.759747  | 5.739228 | 3.916545 |
| 45 | Ce | 5.411000  | 3.826155 | 0.000000 |
| 46 | Ce | 5.414264  | 3.824162 | 3.944509 |
| 47 | Ce | 8.116500  | 5.739232 | 1.913077 |
| 48 | Ce | 8.116500  | 5.739229 | 5.671794 |
| 49 | N  | 8.116500  | 1.913081 | 7.915342 |
| 50 | O  | 8.116500  | 1.913083 | 9.077696 |

**NO adsorbes on O<sub>T1</sub> site of Ce<sub>0.875</sub>Zr<sub>0.125</sub>O<sub>2</sub> (110) surface**

| ATOM |    | X (Angstroms) | Y (Angstroms) | Z (Angstroms) |
|------|----|---------------|---------------|---------------|
| 1    | O  | 1.352750      | 0.000000      | 1.913077      |
| 2    | O  | 1.315523      | -0.052236     | 5.846883      |
| 3    | O  | 4.058250      | 1.913077      | 0.000000      |
| 4    | O  | 4.038849      | 2.007743      | 4.002981      |
| 5    | O  | 4.058250      | 0.000000      | 1.913077      |
| 6    | O  | 3.914046      | -0.034301     | 5.767856      |
| 7    | O  | 1.352750      | 1.913077      | 0.000000      |
| 8    | O  | 1.316733      | 1.862310      | 3.904000      |
| 9    | Ce | 0.000000      | 0.000000      | 0.000000      |
| 10   | Ce | -0.057172     | -0.010081     | 3.898967      |
| 11   | Ce | 2.705500      | 1.913077      | 1.913077      |
| 12   | Ce | 2.599656      | 1.778832      | 5.711653      |
| 13   | O  | 6.763750      | 0.000000      | 1.913077      |
| 14   | O  | 6.791558      | 0.123369      | 5.728648      |

|    |    |           |          |          |
|----|----|-----------|----------|----------|
| 15 | O  | 9.469250  | 1.913077 | 0.000000 |
| 16 | O  | 9.415338  | 1.912766 | 3.839789 |
| 17 | O  | 9.469250  | 0.000000 | 1.913077 |
| 18 | O  | 9.321288  | 0.111309 | 5.741316 |
| 19 | O  | 6.763750  | 1.913077 | 0.000000 |
| 20 | O  | 6.792928  | 1.915104 | 3.822513 |
| 21 | Ce | 5.411000  | 0.000000 | 0.000000 |
| 22 | Ce | 5.407230  | 0.015879 | 3.944420 |
| 23 | Ce | 8.116500  | 1.913077 | 1.913077 |
| 24 | Zr | 8.108915  | 1.920397 | 5.417389 |
| 25 | O  | 1.352750  | 3.826155 | 1.913077 |
| 26 | O  | 1.540177  | 3.841285 | 5.718799 |
| 27 | O  | 4.058250  | 5.739232 | 0.000000 |
| 28 | O  | 3.988979  | 5.670401 | 3.821588 |
| 29 | O  | 4.058250  | 3.826155 | 1.913077 |
| 30 | O  | 4.129101  | 3.814265 | 6.313527 |
| 31 | O  | 1.352750  | 5.739232 | 0.000000 |
| 32 | O  | 1.384515  | 5.768688 | 3.747112 |
| 33 | Ce | 0.000000  | 3.826155 | 0.000000 |
| 34 | Ce | -0.004168 | 3.814862 | 3.939232 |
| 35 | Zr | 2.705500  | 5.739232 | 1.913077 |
| 36 | Ce | 2.622666  | 5.813815 | 5.630502 |
| 37 | O  | 6.763750  | 3.826155 | 1.913077 |
| 38 | O  | 6.834219  | 3.745218 | 5.701258 |
| 39 | O  | 9.469250  | 5.739232 | 0.000000 |
| 40 | O  | 9.459335  | 5.723086 | 3.926684 |
| 41 | O  | 9.469250  | 3.826155 | 1.913077 |
| 42 | O  | 9.380320  | 3.687142 | 5.768820 |
| 43 | O  | 6.763750  | 5.739232 | 0.000000 |
| 44 | O  | 6.750842  | 5.757026 | 3.896333 |
| 45 | Ce | 5.411000  | 3.826155 | 0.000000 |
| 46 | Ce | 5.476831  | 3.836436 | 3.846551 |
| 47 | Ce | 8.116500  | 5.739232 | 1.913077 |
| 48 | Ce | 8.096143  | 5.751647 | 5.680867 |
| 49 | N  | 4.059594  | 4.321753 | 7.540970 |
| 50 | O  | 4.106601  | 3.512846 | 8.447032 |

**NO adsorbes on O<sub>T2</sub> site of Ce<sub>0.875</sub>Zr<sub>0.125</sub>O<sub>2</sub> (110) surface**

| ATOM |    | X (Angstroms) | Y (Angstroms) | Z (Angstroms) |
|------|----|---------------|---------------|---------------|
| 1    | O  | 1.352750      | 0.000000      | 1.913077      |
| 2    | O  | 1.484749      | -0.030872     | 5.742089      |
| 3    | O  | 4.058250      | 1.913077      | 0.000000      |
| 4    | O  | 4.077636      | 1.899096      | 3.852213      |
| 5    | O  | 4.058250      | 0.000000      | 1.913077      |
| 6    | O  | 4.071700      | -0.035336     | 5.740357      |
| 7    | O  | 1.352750      | 1.913077      | 0.000000      |
| 8    | O  | 1.380833      | 1.926222      | 3.884770      |
| 9    | Ce | 0.000000      | 0.000000      | 0.000000      |
| 10   | Ce | 0.076586      | -0.001835     | 3.872288      |
| 11   | Ce | 2.705500      | 1.913077      | 1.913077      |
| 12   | Ce | 2.738563      | 1.910227      | 5.656353      |
| 13   | O  | 6.763750      | 0.000000      | 1.913077      |
| 14   | O  | 6.949841      | 0.032795      | 5.752607      |
| 15   | O  | 9.469250      | 1.913077      | 0.000000      |
| 16   | O  | 9.502279      | 1.865978      | 3.876984      |
| 17   | O  | 9.469250      | 0.000000      | 1.913077      |
| 18   | O  | 9.510334      | 0.060843      | 5.808158      |
| 19   | O  | 6.763750      | 1.913077      | 0.000000      |



|    |    |           |          |          |
|----|----|-----------|----------|----------|
| 20 | O  | 6.829583  | 2.029562 | 4.033268 |
| 21 | Ce | 5.411000  | 0.000000 | 0.000000 |
| 22 | Ce | 5.433385  | 0.000980 | 3.945339 |
| 23 | Ce | 8.116500  | 1.913077 | 1.913077 |
| 24 | Zr | 8.250580  | 1.726962 | 5.567797 |
| 25 | O  | 1.352750  | 3.826155 | 1.913077 |
| 26 | O  | 1.398697  | 3.860430 | 5.768019 |
| 27 | O  | 4.058250  | 5.739232 | 0.000000 |
| 28 | O  | 4.016288  | 5.753307 | 3.698228 |
| 29 | O  | 4.058250  | 3.826155 | 1.913077 |
| 30 | O  | 4.085460  | 3.873495 | 5.695848 |
| 31 | O  | 1.352750  | 5.739232 | 0.000000 |
| 32 | O  | 1.435189  | 5.722280 | 3.730830 |
| 33 | Ce | 0.000000  | 3.826155 | 0.000000 |
| 34 | Ce | -0.019444 | 3.819446 | 3.927788 |
| 35 | Zr | 2.705500  | 5.739232 | 1.913077 |
| 36 | Ce | 2.735533  | 5.736541 | 5.590836 |
| 37 | O  | 6.763750  | 3.826155 | 1.913077 |
| 38 | O  | 6.762782  | 3.013011 | 7.016599 |
| 39 | O  | 9.469250  | 5.739232 | 0.000000 |
| 40 | O  | 9.517464  | 5.781457 | 3.910987 |
| 41 | O  | 9.469250  | 3.826155 | 1.913077 |
| 42 | O  | 9.039754  | 3.779114 | 5.675531 |
| 43 | O  | 6.763750  | 5.739232 | 0.000000 |
| 44 | O  | 6.769224  | 5.621420 | 4.052286 |
| 45 | Ce | 5.411000  | 3.826155 | 0.000000 |
| 46 | Ce | 5.340276  | 3.827047 | 3.797060 |
| 47 | Ce | 8.116500  | 5.739232 | 1.913077 |
| 48 | Ce | 8.247944  | 5.880675 | 5.725232 |
| 49 | N  | 7.319874  | 2.662465 | 8.116253 |
| 50 | O  | 8.276924  | 1.844591 | 7.930981 |

**NO<sub>3</sub> adsorbes on brid<sub>1</sub> site of Ce<sub>0.875</sub>Zr<sub>0.125</sub>O<sub>2</sub> (110) surface**

| ATOM |    | X (Angstroms) | Y (Angstroms) | Z (Angstroms) |
|------|----|---------------|---------------|---------------|
| 1    | O  | 1.352750      | 0.000000      | 1.913077      |
| 2    | O  | 1.394743      | -0.020797     | 5.752756      |
| 3    | O  | 4.058250      | 1.913077      | 0.000000      |
| 4    | O  | 4.061937      | 1.912026      | 3.872412      |
| 5    | O  | 4.058250      | 0.000000      | 1.913077      |
| 6    | O  | 4.008249      | -0.025420     | 5.752588      |
| 7    | O  | 1.352750      | 1.913077      | 0.000000      |
| 8    | O  | 1.349396      | 1.911871      | 3.871920      |
| 9    | Ce | 0.000000      | 0.000000      | 0.000000      |
| 10   | Ce | 0.000557      | 0.002586      | 3.937645      |
| 11   | Ce | 2.705500      | 1.913077      | 1.913077      |
| 12   | Ce | 2.706134      | 1.921102      | 5.717855      |
| 13   | O  | 6.763750      | 0.000000      | 1.913077      |
| 14   | O  | 6.873925      | 0.104994      | 5.778978      |
| 15   | O  | 9.469250      | 1.913077      | 0.000000      |
| 16   | O  | 9.424391      | 1.912390      | 3.854190      |
| 17   | O  | 9.469250      | 0.000000      | 1.913077      |
| 18   | O  | 9.353721      | 0.106270      | 5.783393      |
| 19   | O  | 6.763750      | 1.913077      | 0.000000      |
| 20   | O  | 6.808711      | 1.912439      | 3.854096      |
| 21   | Ce | 5.411000      | 0.000000      | 0.000000      |
| 22   | Ce | 5.410683      | 0.002451      | 3.938162      |
| 23   | Ce | 8.116500      | 1.913077      | 1.913077      |
| 24   | Zr | 8.116804      | 1.920134      | 5.447336      |

|    |    |          |          |          |
|----|----|----------|----------|----------|
| 25 | O  | 1.352750 | 3.826155 | 1.913077 |
| 26 | O  | 1.402072 | 3.859937 | 5.668289 |
| 27 | O  | 4.058250 | 5.739232 | 0.000000 |
| 28 | O  | 4.006384 | 5.755045 | 3.724067 |
| 29 | O  | 4.058250 | 3.826155 | 1.913077 |
| 30 | O  | 4.018034 | 3.853690 | 5.673247 |
| 31 | O  | 1.352750 | 5.739232 | 0.000000 |
| 32 | O  | 1.404285 | 5.754281 | 3.721647 |
| 33 | Ce | 0.000000 | 3.826155 | 0.000000 |
| 34 | Ce | 0.002053 | 3.824337 | 3.923873 |
| 35 | Zr | 2.705500 | 5.739232 | 1.913077 |
| 36 | Ce | 2.706006 | 5.731717 | 5.663627 |
| 37 | O  | 6.763750 | 3.826155 | 1.913077 |
| 38 | O  | 6.880741 | 3.722239 | 5.780102 |
| 39 | O  | 9.469250 | 5.739232 | 0.000000 |
| 40 | O  | 9.471049 | 5.742156 | 3.930573 |
| 41 | O  | 9.469250 | 3.826155 | 1.913077 |
| 42 | O  | 9.357421 | 3.723648 | 5.778117 |
| 43 | O  | 6.763750 | 5.739232 | 0.000000 |
| 44 | O  | 6.762067 | 5.741762 | 3.930390 |
| 45 | Ce | 5.411000 | 3.826155 | 0.000000 |
| 46 | Ce | 5.409192 | 3.824166 | 3.924028 |
| 47 | Ce | 8.116500 | 5.739232 | 1.913077 |
| 48 | Ce | 8.116593 | 5.739336 | 5.700199 |
| 49 | N  | 2.815250 | 3.849836 | 8.754988 |
| 50 | O  | 2.963369 | 3.849563 | 9.979904 |
| 51 | O  | 2.729043 | 2.736251 | 8.127968 |
| 52 | O  | 2.741129 | 4.956584 | 8.124038 |

**NO<sub>3</sub> adsorbes on brid<sub>2</sub> site of Ce<sub>0.875</sub>Zr<sub>0.125</sub>O<sub>2</sub> (110) surface**

| ATOM |    | X (Angstroms) | Y (Angstroms) | Z (Angstroms) |
|------|----|---------------|---------------|---------------|
| 1    | O  | 1.352750      | 0.000000      | 1.913077      |
| 2    | O  | 1.411172      | -0.028160     | 5.763129      |
| 3    | O  | 4.058250      | 1.913077      | 0.000000      |
| 4    | O  | 4.058767      | 1.910593      | 3.882802      |
| 5    | O  | 4.058250      | 0.000000      | 1.913077      |
| 6    | O  | 4.002260      | -0.028919     | 5.765734      |
| 7    | O  | 1.352750      | 1.913077      | 0.000000      |
| 8    | O  | 1.352847      | 1.911562      | 3.881987      |
| 9    | Ce | 0.000000      | 0.000000      | 0.000000      |
| 10   | Ce | -0.011907     | -0.003114     | 3.940876      |
| 11   | Ce | 2.705500      | 1.913077      | 1.913077      |
| 12   | Ce | 2.706820      | 1.919415      | 5.659437      |
| 13   | O  | 6.763750      | 0.000000      | 1.913077      |
| 14   | O  | 6.863766      | 0.076691      | 5.763778      |
| 15   | O  | 9.469250      | 1.913077      | 0.000000      |
| 16   | O  | 9.429356      | 1.905326      | 3.861702      |
| 17   | O  | 9.469250      | 0.000000      | 1.913077      |
| 18   | O  | 9.367259      | 0.074669      | 5.751538      |
| 19   | O  | 6.763750      | 1.913077      | 0.000000      |
| 20   | O  | 6.804440      | 1.899062      | 3.865463      |
| 21   | Ce | 5.411000      | 0.000000      | 0.000000      |
| 22   | Ce | 5.425923      | -0.003044     | 3.945595      |
| 23   | Ce | 8.116500      | 1.913077      | 1.913077      |
| 24   | Zr | 8.118376      | 1.976295      | 5.517960      |
| 25   | O  | 1.352750      | 3.826155      | 1.913077      |
| 26   | O  | 1.418311      | 3.852155      | 5.763908      |
| 27   | O  | 4.058250      | 5.739232      | 0.000000      |

|    |    |           |          |          |
|----|----|-----------|----------|----------|
| 28 | O  | 3.997262  | 5.741842 | 3.733797 |
| 29 | O  | 4.058250  | 3.826155 | 1.913077 |
| 30 | O  | 3.994217  | 3.852959 | 5.764011 |
| 31 | O  | 1.352750  | 5.739232 | 0.000000 |
| 32 | O  | 1.417579  | 5.741332 | 3.732705 |
| 33 | Ce | 0.000000  | 3.826155 | 0.000000 |
| 34 | Ce | -0.006221 | 3.827835 | 3.923235 |
| 35 | Zr | 2.705500  | 5.739232 | 1.913077 |
| 36 | Ce | 2.706750  | 5.729972 | 5.601759 |
| 37 | O  | 6.763750  | 3.826155 | 1.913077 |
| 38 | O  | 6.842883  | 3.754620 | 5.652060 |
| 39 | O  | 9.469250  | 5.739232 | 0.000000 |
| 40 | O  | 9.471076  | 5.746287 | 3.903022 |
| 41 | O  | 9.469250  | 3.826155 | 1.913077 |
| 42 | O  | 9.392373  | 3.746363 | 5.657727 |
| 43 | O  | 6.763750  | 5.739232 | 0.000000 |
| 44 | O  | 6.766084  | 5.750266 | 3.904513 |
| 45 | Ce | 5.411000  | 3.826155 | 0.000000 |
| 46 | Ce | 5.418533  | 3.827631 | 3.924907 |
| 47 | Ce | 8.116500  | 5.739232 | 1.913077 |
| 48 | Ce | 8.121664  | 5.735488 | 5.742580 |
| 49 | N  | 8.275595  | 3.395294 | 8.555008 |
| 50 | O  | 8.480579  | 3.232850 | 9.759375 |
| 51 | O  | 8.149297  | 2.347267 | 7.809358 |
| 52 | O  | 8.180690  | 4.567955 | 8.074451 |

**NO<sub>3</sub> adsorbes on biden site of Ce<sub>0.875</sub>Zr<sub>0.125</sub>O<sub>2</sub> (110) surface**

| ATOM |    | X (Angstroms) | Y (Angstroms) | Z (Angstroms) |
|------|----|---------------|---------------|---------------|
| 1    | O  | 1.352750      | 0.000000      | 1.913077      |
| 2    | O  | 1.417309      | -0.031149     | 5.767835      |
| 3    | O  | 4.058250      | 1.913077      | 0.000000      |
| 4    | O  | 4.061970      | 1.909943      | 3.880609      |
| 5    | O  | 4.058250      | 0.000000      | 1.913077      |
| 6    | O  | 3.999098      | -0.019529     | 5.749478      |
| 7    | O  | 1.352750      | 1.913077      | 0.000000      |
| 8    | O  | 1.345477      | 1.912026      | 3.894825      |
| 9    | Ce | 0.000000      | 0.000000      | 0.000000      |
| 10   | Ce | -0.013313     | -0.009970     | 3.950605      |
| 11   | Ce | 2.705500      | 1.913077      | 1.913077      |
| 12   | Ce | 2.713758      | 1.910481      | 5.667064      |
| 13   | O  | 6.763750      | 0.000000      | 1.913077      |
| 14   | O  | 6.866373      | 0.145158      | 5.732948      |
| 15   | O  | 9.469250      | 1.913077      | 0.000000      |
| 16   | O  | 9.429175      | 1.912563      | 3.821916      |
| 17   | O  | 9.469250      | 0.000000      | 1.913077      |
| 18   | O  | 9.376444      | 0.143470      | 5.745383      |
| 19   | O  | 6.763750      | 1.913077      | 0.000000      |
| 20   | O  | 6.798450      | 1.909850      | 3.817741      |
| 21   | Ce | 5.411000      | 0.000000      | 0.000000      |
| 22   | Ce | 5.422795      | -0.003228     | 3.936377      |
| 23   | Ce | 8.116500      | 1.913077      | 1.913077      |
| 24   | Zr | 8.119472      | 1.913299      | 5.422058      |
| 25   | O  | 1.352750      | 3.826155      | 1.913077      |
| 26   | O  | 1.417525      | 3.854313      | 5.765471      |
| 27   | O  | 4.058250      | 5.739232      | 0.000000      |
| 28   | O  | 3.995005      | 5.740303      | 3.736406      |
| 29   | O  | 4.058250      | 3.826155      | 1.913077      |
| 30   | O  | 4.000306      | 3.845397      | 5.748202      |

|    |    |           |          |           |
|----|----|-----------|----------|-----------|
| 31 | O  | 1.352750  | 5.739232 | 0.000000  |
| 32 | O  | 1.411734  | 5.737085 | 3.742229  |
| 33 | Ce | 0.000000  | 3.826155 | 0.000000  |
| 34 | Ce | -0.016430 | 3.832090 | 3.951736  |
| 35 | Zr | 2.705500  | 5.739232 | 1.913077  |
| 36 | Ce | 2.704739  | 5.738408 | 5.612994  |
| 37 | O  | 6.763750  | 3.826155 | 1.913077  |
| 38 | O  | 6.867047  | 3.680343 | 5.726383  |
| 39 | O  | 9.469250  | 5.739232 | 0.000000  |
| 40 | O  | 9.477243  | 5.738133 | 3.943288  |
| 41 | O  | 9.469250  | 3.826155 | 1.913077  |
| 42 | O  | 9.373682  | 3.685607 | 5.747509  |
| 43 | O  | 6.763750  | 5.739232 | 0.000000  |
| 44 | O  | 6.752193  | 5.737937 | 3.931489  |
| 45 | Ce | 5.411000  | 3.826155 | 0.000000  |
| 46 | Ce | 5.416081  | 3.833080 | 3.936145  |
| 47 | Ce | 8.116500  | 5.739232 | 1.913077  |
| 48 | Ce | 8.085117  | 5.740755 | 5.805284  |
| 49 | N  | 7.750988  | 5.747736 | 8.805310  |
| 50 | O  | 7.631904  | 5.754699 | 10.026186 |
| 51 | O  | 8.905188  | 5.755605 | 8.236085  |
| 52 | O  | 6.737316  | 5.732215 | 8.021374  |

**NO<sub>3</sub> adsorbes on monoden site of Ce<sub>0.875</sub>Zr<sub>0.125</sub>O<sub>2</sub> (110) surface**

| ATOM |    | X (Angstroms) | Y (Angstroms) | Z (Angstroms) |
|------|----|---------------|---------------|---------------|
| 1    | O  | 1.352750      | 0.000000      | 1.913077      |
| 2    | O  | 1.420559      | -0.016615     | 5.770694      |
| 3    | O  | 4.058250      | 1.913077      | 0.000000      |
| 4    | O  | 4.058070      | 1.913367      | 3.885269      |
| 5    | O  | 4.058250      | 0.000000      | 1.913077      |
| 6    | O  | 4.000785      | -0.044824     | 5.740390      |
| 7    | O  | 1.352750      | 1.913077      | 0.000000      |
| 8    | O  | 1.355231      | 1.912989      | 3.889372      |
| 9    | Ce | 0.000000      | 0.000000      | 0.000000      |
| 10   | Ce | -0.004507     | 0.002414      | 3.947508      |
| 11   | Ce | 2.705500      | 1.913077      | 1.913077      |
| 12   | Ce | 2.719368      | 1.913810      | 5.674996      |
| 13   | O  | 6.763750      | 0.000000      | 1.913077      |
| 14   | O  | 6.869015      | 0.015720      | 5.695341      |
| 15   | O  | 9.469250      | 1.913077      | 0.000000      |
| 16   | O  | 9.430877      | 1.913273      | 3.869508      |
| 17   | O  | 9.469250      | 0.000000      | 1.913077      |
| 18   | O  | 9.378380      | 0.077259      | 5.728491      |
| 19   | O  | 6.763750      | 1.913077      | 0.000000      |
| 20   | O  | 6.795235      | 1.913270      | 3.883241      |
| 21   | Ce | 5.411000      | 0.000000      | 0.000000      |
| 22   | Ce | 5.417807      | -0.002913     | 3.924549      |
| 23   | Ce | 8.116500      | 1.913077      | 1.913077      |
| 24   | Zr | 8.102226      | 1.914107      | 5.524754      |
| 25   | O  | 1.352750      | 3.826155      | 1.913077      |
| 26   | O  | 1.421403      | 3.842427      | 5.770533      |
| 27   | O  | 4.058250      | 5.739232      | 0.000000      |
| 28   | O  | 3.997451      | 5.738833      | 3.722175      |
| 29   | O  | 4.058250      | 3.826155      | 1.913077      |
| 30   | O  | 4.001706      | 3.871549      | 5.740233      |
| 31   | O  | 1.352750      | 5.739232      | 0.000000      |
| 32   | O  | 1.412285      | 5.739138      | 3.740578      |
| 33   | Ce | 0.000000      | 3.826155      | 0.000000      |

|    |    |           |          |          |
|----|----|-----------|----------|----------|
| 34 | Ce | -0.003915 | 3.823837 | 3.946881 |
| 35 | Zr | 2.705500  | 5.739232 | 1.913077 |
| 36 | Ce | 2.718915  | 5.739266 | 5.600881 |
| 37 | O  | 6.763750  | 3.826155 | 1.913077 |
| 38 | O  | 6.868523  | 3.809540 | 5.697819 |
| 39 | O  | 9.469250  | 5.739232 | 0.000000 |
| 40 | O  | 9.472924  | 5.739552 | 3.895363 |
| 41 | O  | 9.469250  | 3.826155 | 1.913077 |
| 42 | O  | 9.379854  | 3.747122 | 5.728140 |
| 43 | O  | 6.763750  | 5.739232 | 0.000000 |
| 44 | O  | 6.760257  | 5.738989 | 3.864616 |
| 45 | Ce | 5.411000  | 3.826155 | 0.000000 |
| 46 | Ce | 5.417281  | 3.829106 | 3.924229 |
| 47 | Ce | 8.116500  | 5.739232 | 1.913077 |
| 48 | Ce | 8.108486  | 5.739639 | 5.672149 |
| 49 | N  | 6.904163  | 1.911610 | 8.451653 |
| 50 | O  | 6.927580  | 1.911300 | 9.690478 |
| 51 | O  | 8.044642  | 1.913643 | 7.815039 |
| 52 | O  | 5.846239  | 1.908925 | 7.791420 |

|      |    | NO <sub>2</sub> -O <sub>2</sub> * |               |               |
|------|----|-----------------------------------|---------------|---------------|
| ATOM |    | X (Angstroms)                     | Y (Angstroms) | Z (Angstroms) |
| 1    | O  | 1.352750                          | 0.000000      | 1.913077      |
| 2    | O  | 1.488189                          | -0.050062     | 5.743321      |
| 3    | O  | 4.058250                          | 1.913077      | 0.000000      |
| 4    | O  | 4.081996                          | 1.902314      | 3.848166      |
| 5    | O  | 4.058250                          | 0.000000      | 1.913077      |
| 6    | O  | 4.070217                          | -0.022472     | 5.738931      |
| 7    | O  | 1.352750                          | 1.913077      | 0.000000      |
| 8    | O  | 1.377077                          | 1.922638      | 3.886094      |
| 9    | Ce | 0.000000                          | 0.000000      | 0.000000      |
| 10   | Ce | 0.078422                          | -0.023648     | 3.883444      |
| 11   | Ce | 2.705500                          | 1.913077      | 1.913077      |
| 12   | Ce | 2.740071                          | 1.905095      | 5.649812      |
| 13   | O  | 6.763750                          | 0.000000      | 1.913077      |
| 14   | O  | 6.957571                          | 0.083734      | 5.742373      |
| 15   | O  | 9.469250                          | 1.913077      | 0.000000      |
| 16   | O  | 9.499728                          | 1.850823      | 3.847305      |
| 17   | O  | 9.469250                          | 0.000000      | 1.913077      |
| 18   | O  | 9.525607                          | 0.127170      | 5.852753      |
| 19   | O  | 6.763750                          | 1.913077      | 0.000000      |
| 20   | O  | 6.836512                          | 2.058707      | 4.036509      |
| 21   | Ce | 5.411000                          | 0.000000      | 0.000000      |
| 22   | Ce | 5.438830                          | 0.002543      | 3.949547      |
| 23   | Ce | 8.116500                          | 1.913077      | 1.913077      |
| 24   | Zr | 8.299657                          | 1.734925      | 5.501598      |
| 25   | O  | 1.352750                          | 3.826155      | 1.913077      |
| 26   | O  | 1.396228                          | 3.864751      | 5.763045      |
| 27   | O  | 4.058250                          | 5.739232      | 0.000000      |
| 28   | O  | 4.016919                          | 5.753450      | 3.706879      |
| 29   | O  | 4.058250                          | 3.826155      | 1.913077      |
| 30   | O  | 4.090302                          | 3.848929      | 5.699086      |
| 31   | O  | 1.352750                          | 5.739232      | 0.000000      |
| 32   | O  | 1.441582                          | 5.718371      | 3.729453      |
| 33   | Ce | 0.000000                          | 3.826155      | 0.000000      |
| 34   | Ce | -0.005138                         | 3.833760      | 3.916536      |
| 35   | Zr | 2.705500                          | 5.739232      | 1.913077      |
| 36   | Ce | 2.747692                          | 5.731678      | 5.603688      |

|    |    |          |          |          |
|----|----|----------|----------|----------|
| 37 | O  | 6.763750 | 3.826155 | 1.913077 |
| 38 | O  | 7.665696 | 2.387534 | 7.862800 |
| 39 | O  | 9.469250 | 5.739232 | 0.000000 |
| 40 | O  | 9.526718 | 5.774650 | 3.938997 |
| 41 | O  | 9.469250 | 3.826155 | 1.913077 |
| 42 | O  | 9.009724 | 3.711168 | 5.717176 |
| 43 | O  | 6.763750 | 5.739232 | 0.000000 |
| 44 | O  | 6.761875 | 5.637229 | 4.045562 |
| 45 | Ce | 5.411000 | 3.826155 | 0.000000 |
| 46 | Ce | 5.342114 | 3.842949 | 3.795968 |
| 47 | Ce | 8.116500 | 5.739232 | 1.913077 |
| 48 | Ce | 8.195219 | 5.874380 | 5.790983 |
| 49 | N  | 8.209586 | 3.303314 | 8.469722 |
| 50 | O  | 9.063544 | 3.297283 | 9.313990 |
| 51 | O  | 6.609261 | 4.757503 | 7.261152 |
| 52 | O  | 7.592030 | 4.790782 | 8.196658 |

TS

| X (Angstroms) | Y (Angstroms) | Z (Angstroms) |
|---------------|---------------|---------------|
| 1.352750000   | 0.000000000   | 1.913077397   |
| 1.455841972   | -0.043611506  | 5.745606455   |
| 4.058250000   | 1.913077397   | 0.000000000   |
| 4.075640780   | 1.907929533   | 3.858411342   |
| 4.058250000   | 0.000000000   | 1.913077397   |
| 4.038757425   | -0.021923288  | 5.740090596   |
| 1.352750000   | 1.913077397   | 0.000000000   |
| 1.362561083   | 1.919415970   | 3.879962701   |
| 0.000000000   | 0.000000000   | 0.000000000   |
| 0.036775902   | -0.014213655  | 3.903510017   |
| 2.705500000   | 1.913077397   | 1.913077397   |
| 2.714169611   | 1.901938098   | 5.650398746   |
| 6.763750000   | 0.000000000   | 1.913077397   |
| 6.928463393   | 0.101098272   | 5.740099923   |
| 9.469250000   | 1.913077397   | 0.000000000   |
| 9.470921641   | 1.874547038   | 3.853942073   |
| 9.469250000   | 0.000000000   | 1.913077397   |
| 9.476256979   | 0.140827351   | 5.812119495   |
| 6.763750000   | 1.913077397   | 0.000000000   |
| 6.825260889   | 2.036368846   | 3.997236527   |
| 5.411000000   | 0.000000000   | 0.000000000   |
| 5.443681226   | -0.000811911  | 3.965827371   |
| 8.116500000   | 1.913077397   | 1.913077397   |
| 8.265330004   | 1.759663183   | 5.523569906   |
| 1.352750000   | 3.826154793   | 1.913077397   |
| 1.388335910   | 3.859857184   | 5.755569560   |
| 4.058250000   | 5.739232190   | 0.000000000   |
| 4.010463302   | 5.747559271   | 3.713977513   |
| 4.058250000   | 3.826154793   | 1.913077397   |
| 4.039425562   | 3.843841166   | 5.698388211   |
| 1.352750000   | 5.739232190   | 0.000000000   |
| 1.425911952   | 5.725122559   | 3.726653929   |
| 0.000000000   | 3.826154793   | 0.000000000   |
| -0.014266350  | 3.831405176   | 3.918250639   |
| 2.705500000   | 5.739232190   | 1.913077397   |
| 2.722351930   | 5.739854262   | 5.599553577   |
| 6.763750000   | 3.826154793   | 1.913077397   |
| 7.855578357   | 2.370526363   | 7.869690002   |
| 9.469250000   | 5.739232190   | 0.000000000   |

|             |             |             |
|-------------|-------------|-------------|
| 9.515536505 | 5.764325112 | 3.916572751 |
| 9.469250000 | 3.826154793 | 1.913077397 |
| 9.149251476 | 3.717524541 | 5.694206637 |
| 6.763750000 | 5.739232190 | 0.000000000 |
| 6.757600302 | 5.663546885 | 3.992020503 |
| 5.411000000 | 3.826154793 | 0.000000000 |
| 5.347353488 | 3.854663409 | 3.830768905 |
| 8.116500000 | 5.739232190 | 1.913077397 |
| 8.157900656 | 5.833029800 | 5.802708284 |
| 8.202770810 | 3.357807648 | 8.533557097 |
| 8.879274282 | 3.258497414 | 9.547491203 |
| 6.612639244 | 4.465149197 | 6.802885773 |
| 7.801115483 | 4.589036423 | 8.168890877 |

**Cartesian coordinates of NO<sub>3</sub>\***

| ATOM |    | X (Angstroms) | Y (Angstroms) | Z (Angstroms) |
|------|----|---------------|---------------|---------------|
| 1    | O  | 1.352750      | 0.000000      | 1.913077      |
| 2    | O  | 1.407805      | -0.028301     | 5.765962      |
| 3    | O  | 4.058250      | 1.913077      | 0.000000      |
| 4    | O  | 4.057699      | 1.910134      | 3.883060      |
| 5    | O  | 4.058250      | 0.000000      | 1.913077      |
| 6    | O  | 4.006603      | -0.028594     | 5.763184      |
| 7    | O  | 1.352750      | 1.913077      | 0.000000      |
| 8    | O  | 1.353096      | 1.910612      | 3.882879      |
| 9    | Ce | 0.000000      | 0.000000      | 0.000000      |
| 10   | Ce | -0.026086     | 0.002049      | 3.946071      |
| 11   | Ce | 2.705500      | 1.913077      | 1.913077      |
| 12   | Ce | 2.704785      | 1.919390      | 5.660009      |
| 13   | O  | 6.763750      | 0.000000      | 1.913077      |
| 14   | O  | 6.880888      | 0.103241      | 5.761801      |
| 15   | O  | 9.469250      | 1.913077      | 0.000000      |
| 16   | O  | 9.426672      | 1.903084      | 3.865981      |
| 17   | O  | 9.469250      | 0.000000      | 1.913077      |
| 18   | O  | 9.358035      | 0.081388      | 5.761482      |
| 19   | O  | 6.763750      | 1.913077      | 0.000000      |
| 20   | O  | 6.801405      | 1.906814      | 3.856681      |
| 21   | Ce | 5.411000      | 0.000000      | 0.000000      |
| 22   | Ce | 5.439694      | 0.004658      | 3.942862      |
| 23   | Ce | 8.116500      | 1.913077      | 1.913077      |
| 24   | Zr | 8.108103      | 1.966530      | 5.519303      |
| 25   | O  | 1.352750      | 3.826155      | 1.913077      |
| 26   | O  | 1.420346      | 3.847976      | 5.761400      |
| 27   | O  | 4.058250      | 5.739232      | 0.000000      |
| 28   | O  | 3.994676      | 5.740991      | 3.729283      |
| 29   | O  | 4.058250      | 3.826155      | 1.913077      |
| 30   | O  | 3.996165      | 3.853186      | 5.757799      |
| 31   | O  | 1.352750      | 5.739232      | 0.000000      |
| 32   | O  | 1.409706      | 5.739939      | 3.733941      |
| 33   | Ce | 0.000000      | 3.826155      | 0.000000      |
| 34   | Ce | -0.002034     | 3.829352      | 3.918015      |
| 35   | Zr | 2.705500      | 5.739232      | 1.913077      |
| 36   | Ce | 2.707661      | 5.732965      | 5.596889      |
| 37   | O  | 6.763750      | 3.826155      | 1.913077      |
| 38   | O  | 8.123558      | 2.347012      | 7.796411      |
| 39   | O  | 9.469250      | 5.739232      | 0.000000      |
| 40   | O  | 9.471478      | 5.752335      | 3.897284      |
| 41   | O  | 9.469250      | 3.826155      | 1.913077      |
| 42   | O  | 9.397361      | 3.765916      | 5.656897      |

|    |    |          |          |          |
|----|----|----------|----------|----------|
| 43 | O  | 6.763750 | 5.739232 | 0.000000 |
| 44 | O  | 6.757955 | 5.758136 | 3.904593 |
| 45 | Ce | 5.411000 | 3.826155 | 0.000000 |
| 46 | Ce | 5.412240 | 3.833079 | 3.916918 |
| 47 | Ce | 8.116500 | 5.739232 | 1.913077 |
| 48 | Ce | 8.121848 | 5.671725 | 5.737944 |
| 49 | N  | 8.117718 | 3.389866 | 8.560618 |
| 50 | O  | 8.126477 | 3.222286 | 9.780649 |
| 51 | O  | 6.842459 | 3.754841 | 5.649624 |
| 52 | O  | 8.102672 | 4.566826 | 8.076200 |

**C<sub>sp3</sub>-H of C<sub>3</sub>H<sub>6</sub> adsorbes on O<sub>T</sub> site of Ce<sub>0.875</sub>Zr<sub>0.125</sub>O<sub>2</sub> (110) surface**

| ATOM |    | X (Angstroms) | Y (Angstroms) | Z (Angstroms) |
|------|----|---------------|---------------|---------------|
| 1    | O  | 1.352750      | 0.000000      | 1.913077      |
| 2    | O  | 1.401448      | -0.024247     | 5.784023      |
| 3    | O  | 4.058250      | 1.913077      | 0.000000      |
| 4    | O  | 4.052739      | 1.915392      | 3.897477      |
| 5    | O  | 4.058250      | 0.000000      | 1.913077      |
| 6    | O  | 3.990031      | -0.030824     | 5.775394      |
| 7    | O  | 1.352750      | 1.913077      | 0.000000      |
| 8    | O  | 1.345108      | 1.913606      | 3.896428      |
| 9    | Ce | 0.000000      | 0.000000      | 0.000000      |
| 10   | Ce | -0.008951     | 0.005272      | 3.953308      |
| 11   | Ce | 2.705500      | 1.913077      | 1.913077      |
| 12   | Ce | 2.698413      | 1.916647      | 5.657887      |
| 13   | O  | 6.763750      | 0.000000      | 1.913077      |
| 14   | O  | 6.840187      | 0.110615      | 5.748157      |
| 15   | O  | 9.469250      | 1.913077      | 0.000000      |
| 16   | O  | 9.432423      | 1.909410      | 3.847029      |
| 17   | O  | 9.469250      | 0.000000      | 1.913077      |
| 18   | O  | 9.363650      | 0.114408      | 5.759953      |
| 19   | O  | 6.763750      | 1.913077      | 0.000000      |
| 20   | O  | 6.796425      | 1.911483      | 3.842044      |
| 21   | Ce | 5.411000      | 0.000000      | 0.000000      |
| 22   | Ce | 5.405066      | 0.002543      | 3.950767      |
| 23   | Ce | 8.116500      | 1.913077      | 1.913077      |
| 24   | Zr | 8.110007      | 1.906151      | 5.423165      |
| 25   | O  | 1.352750      | 3.826155      | 1.913077      |
| 26   | O  | 1.394072      | 3.865266      | 5.781430      |
| 27   | O  | 4.058250      | 5.739232      | 0.000000      |
| 28   | O  | 3.994245      | 5.737117      | 3.747098      |
| 29   | O  | 4.058250      | 3.826155      | 1.913077      |
| 30   | O  | 3.988885      | 3.851689      | 5.778705      |
| 31   | O  | 1.352750      | 5.739232      | 0.000000      |
| 32   | O  | 1.399007      | 5.743069      | 3.746109      |
| 33   | Ce | 0.000000      | 3.826155      | 0.000000      |
| 34   | Ce | -0.012469     | 3.831198      | 3.946102      |
| 35   | Zr | 2.705500      | 5.739232      | 1.913077      |
| 36   | Ce | 2.696322      | 5.742129      | 5.598422      |
| 37   | O  | 6.763750      | 3.826155      | 1.913077      |
| 38   | O  | 6.841873      | 3.715003      | 5.757948      |
| 39   | O  | 9.469250      | 5.739232      | 0.000000      |
| 40   | O  | 9.467511      | 5.741483      | 3.920898      |
| 41   | O  | 9.469250      | 3.826155      | 1.913077      |
| 42   | O  | 9.366317      | 3.722492      | 5.750018      |
| 43   | O  | 6.763750      | 5.739232      | 0.000000      |
| 44   | O  | 6.746442      | 5.737025      | 3.920899      |
| 45   | Ce | 5.411000      | 3.826155      | 0.000000      |



|    |    |           |          |           |
|----|----|-----------|----------|-----------|
| 46 | Ce | 5.415208  | 3.823160 | 3.950461  |
| 47 | Ce | 8.116500  | 5.739232 | 1.913077  |
| 48 | Ce | 8.103627  | 5.727851 | 5.681765  |
| 49 | C  | 8.833469  | 5.781669 | 8.926830  |
| 50 | C  | 9.678317  | 4.569820 | 9.160983  |
| 51 | C  | 7.496292  | 5.784839 | 8.777065  |
| 52 | H  | 10.288452 | 4.697583 | 10.072881 |
| 53 | H  | 10.373240 | 4.402562 | 8.319048  |
| 54 | H  | 9.064556  | 3.664408 | 9.276833  |
| 55 | H  | 6.942318  | 6.712188 | 8.600977  |
| 56 | H  | 6.913244  | 4.857783 | 8.822555  |
| 57 | H  | 9.369156  | 6.738449 | 8.856750  |

**C<sub>sp3</sub>-H of C<sub>3</sub>H<sub>6</sub> adsorbes on Ce<sub>T</sub> site of Ce<sub>0.875</sub>Zr<sub>0.125</sub>O<sub>2</sub> (110) surface**

| ATOM |    | X (Angstroms) | Y (Angstroms) | Z (Angstroms) |
|------|----|---------------|---------------|---------------|
| 1    | O  | 1.352750      | 0.000000      | 1.913077      |
| 2    | O  | 1.412538      | -0.033275     | 5.770461      |
| 3    | O  | 4.058250      | 1.913077      | 0.000000      |
| 4    | O  | 4.066024      | 1.910906      | 3.890016      |
| 5    | O  | 4.058250      | 0.000000      | 1.913077      |
| 6    | O  | 3.999871      | -0.013715     | 5.771161      |
| 7    | O  | 1.352750      | 1.913077      | 0.000000      |
| 8    | O  | 1.348626      | 1.908852      | 3.894057      |
| 9    | Ce | 0.000000      | 0.000000      | 0.000000      |
| 10   | Ce | -0.000126     | -0.000157     | 3.947739      |
| 11   | Ce | 2.705500      | 1.913077      | 1.913077      |
| 12   | Ce | 2.706008      | 1.908659      | 5.656812      |
| 13   | O  | 6.763750      | 0.000000      | 1.913077      |
| 14   | O  | 6.857114      | 0.084833      | 5.759069      |
| 15   | O  | 9.469250      | 1.913077      | 0.000000      |
| 16   | O  | 9.439109      | 1.912175      | 3.848085      |
| 17   | O  | 9.469250      | 0.000000      | 1.913077      |
| 18   | O  | 9.378678      | 0.116282      | 5.762812      |
| 19   | O  | 6.763750      | 1.913077      | 0.000000      |
| 20   | O  | 6.809248      | 1.912655      | 3.859657      |
| 21   | Ce | 5.411000      | 0.000000      | 0.000000      |
| 22   | Ce | 5.418974      | 0.004367      | 3.950576      |
| 23   | Ce | 8.116500      | 1.913077      | 1.913077      |
| 24   | Zr | 8.134556      | 1.912634      | 5.435336      |
| 25   | O  | 1.352750      | 3.826155      | 1.913077      |
| 26   | O  | 1.410501      | 3.862053      | 5.771828      |
| 27   | O  | 4.058250      | 5.739232      | 0.000000      |
| 28   | O  | 4.007132      | 5.739426      | 3.749269      |
| 29   | O  | 4.058250      | 3.826155      | 1.913077      |
| 30   | O  | 3.999250      | 3.842541      | 5.770223      |
| 31   | O  | 1.352750      | 5.739232      | 0.000000      |
| 32   | O  | 1.412170      | 5.738189      | 3.742504      |
| 33   | Ce | 0.000000      | 3.826155      | 0.000000      |
| 34   | Ce | -0.003283     | 3.823737      | 3.952632      |
| 35   | Zr | 2.705500      | 5.739232      | 1.913077      |
| 36   | Ce | 2.708973      | 5.736624      | 5.596684      |
| 37   | O  | 6.763750      | 3.826155      | 1.913077      |
| 38   | O  | 6.856359      | 3.745127      | 5.757438      |
| 39   | O  | 9.469250      | 5.739232      | 0.000000      |
| 40   | O  | 9.476599      | 5.739021      | 3.927356      |
| 41   | O  | 9.469250      | 3.826155      | 1.913077      |
| 42   | O  | 9.377730      | 3.708688      | 5.761859      |
| 43   | O  | 6.763750      | 5.739232      | 0.000000      |

|    |    |          |          |           |
|----|----|----------|----------|-----------|
| 44 | O  | 6.758837 | 5.744338 | 3.915342  |
| 45 | Ce | 5.411000 | 3.826155 | 0.000000  |
| 46 | Ce | 5.420338 | 3.823284 | 3.952511  |
| 47 | Ce | 8.116500 | 5.739232 | 1.913077  |
| 48 | Ce | 8.106263 | 5.743787 | 5.677866  |
| 49 | C  | 6.947610 | 4.864894 | 10.577406 |
| 50 | C  | 8.152376 | 5.612324 | 10.098927 |
| 51 | C  | 5.994379 | 5.358383 | 11.378273 |
| 52 | H  | 8.198113 | 5.616726 | 8.996534  |
| 53 | H  | 9.084661 | 5.126232 | 10.439320 |
| 54 | H  | 8.157126 | 6.656182 | 10.447161 |
| 55 | H  | 5.139721 | 4.751117 | 11.691497 |
| 56 | H  | 6.031063 | 6.389549 | 11.745230 |
| 57 | H  | 6.860753 | 3.827235 | 10.229068 |

**C<sub>sp3</sub>-H of C<sub>3</sub>H<sub>6</sub> adsorbes on Zr<sub>T</sub> site of Ce<sub>0.875</sub>Zr<sub>0.125</sub>O<sub>2</sub> (110) surface**

| ATOM |    | X (Angstroms) | Y (Angstroms) | Z (Angstroms) |
|------|----|---------------|---------------|---------------|
| 1    | O  | 1.352750      | 0.000000      | 1.913077      |
| 2    | O  | 1.411807      | -0.031030     | 5.771205      |
| 3    | O  | 4.058250      | 1.913077      | 0.000000      |
| 4    | O  | 4.065576      | 1.913285      | 3.892881      |
| 5    | O  | 4.058250      | 0.000000      | 1.913077      |
| 6    | O  | 3.998529      | -0.024838     | 5.768164      |
| 7    | O  | 1.352750      | 1.913077      | 0.000000      |
| 8    | O  | 1.350722      | 1.913379      | 3.897647      |
| 9    | Ce | 0.000000      | 0.000000      | 0.000000      |
| 10   | Ce | -0.000488     | -0.000334     | 3.948775      |
| 11   | Ce | 2.705500      | 1.913077      | 1.913077      |
| 12   | Ce | 2.711214      | 1.908890      | 5.661452      |
| 13   | O  | 6.763750      | 0.000000      | 1.913077      |
| 14   | O  | 6.856244      | 0.084865      | 5.753824      |
| 15   | O  | 9.469250      | 1.913077      | 0.000000      |
| 16   | O  | 9.437125      | 1.912938      | 3.841990      |
| 17   | O  | 9.469250      | 0.000000      | 1.913077      |
| 18   | O  | 9.376992      | 0.120320      | 5.757820      |
| 19   | O  | 6.763750      | 1.913077      | 0.000000      |
| 20   | O  | 6.804352      | 1.913965      | 3.853411      |
| 21   | Ce | 5.411000      | 0.000000      | 0.000000      |
| 22   | Ce | 5.415467      | -0.000193     | 3.947333      |
| 23   | Ce | 8.116500      | 1.913077      | 1.913077      |
| 24   | Zr | 8.132095      | 1.912983      | 5.425528      |
| 25   | O  | 1.352750      | 3.826155      | 1.913077      |
| 26   | O  | 1.411874      | 3.856769      | 5.770841      |
| 27   | O  | 4.058250      | 5.739232      | 0.000000      |
| 28   | O  | 4.005027      | 5.738718      | 3.745413      |
| 29   | O  | 4.058250      | 3.826155      | 1.913077      |
| 30   | O  | 3.999095      | 3.850764      | 5.771293      |
| 31   | O  | 1.352750      | 5.739232      | 0.000000      |
| 32   | O  | 1.408993      | 5.739798      | 3.742340      |
| 33   | Ce | 0.000000      | 3.826155      | 0.000000      |
| 34   | Ce | -0.001688     | 3.826122      | 3.951583      |
| 35   | Zr | 2.705500      | 5.739232      | 1.913077      |
| 36   | Ce | 2.706384      | 5.737171      | 5.596436      |
| 37   | O  | 6.763750      | 3.826155      | 1.913077      |
| 38   | O  | 6.854469      | 3.740674      | 5.759178      |
| 39   | O  | 9.469250      | 5.739232      | 0.000000      |
| 40   | O  | 9.472253      | 5.738903      | 3.933274      |
| 41   | O  | 9.469250      | 3.826155      | 1.913077      |

|    |    |          |          |           |
|----|----|----------|----------|-----------|
| 42 | O  | 9.377748 | 3.702910 | 5.760480  |
| 43 | O  | 6.763750 | 5.739232 | 0.000000  |
| 44 | O  | 6.763571 | 5.738396 | 3.918349  |
| 45 | Ce | 5.411000 | 3.826155 | 0.000000  |
| 46 | Ce | 5.416261 | 3.826436 | 3.949430  |
| 47 | Ce | 8.116500 | 5.739232 | 1.913077  |
| 48 | Ce | 8.105257 | 5.743170 | 5.678226  |
| 49 | C  | 7.001799 | 2.424561 | 9.991373  |
| 50 | C  | 8.283285 | 1.886621 | 9.438335  |
| 51 | C  | 6.209566 | 1.782710 | 10.860545 |
| 52 | H  | 9.144116 | 2.517607 | 9.723031  |
| 53 | H  | 8.267217 | 1.876767 | 8.335483  |
| 54 | H  | 8.479170 | 0.858921 | 9.781886  |
| 55 | H  | 5.285779 | 2.231961 | 11.236707 |
| 56 | H  | 6.452568 | 0.775372 | 11.217307 |
| 57 | H  | 6.714528 | 3.428718 | 9.655089  |

**C<sub>sp2</sub>-H of C<sub>3</sub>H<sub>6</sub> adsorbes on O<sub>T</sub> site of Ce<sub>0.875</sub>Zr<sub>0.125</sub>O<sub>2</sub> (110) surface**

| ATOM |    | X (Angstroms) | Y (Angstroms) | Z (Angstroms) |
|------|----|---------------|---------------|---------------|
| 1    | O  | 1.352750      | 0.000000      | 1.913077      |
| 2    | O  | 1.411560      | -0.029385     | 5.777379      |
| 3    | O  | 4.058250      | 1.913077      | 0.000000      |
| 4    | O  | 4.061187      | 1.913544      | 3.894791      |
| 5    | O  | 4.058250      | 0.000000      | 1.913077      |
| 6    | O  | 3.998345      | -0.024294     | 5.785164      |
| 7    | O  | 1.352750      | 1.913077      | 0.000000      |
| 8    | O  | 1.349891      | 1.911790      | 3.893256      |
| 9    | Ce | 0.000000      | 0.000000      | 0.000000      |
| 10   | Ce | -0.003980     | 0.003902      | 3.947770      |
| 11   | Ce | 2.705500      | 1.913077      | 1.913077      |
| 12   | Ce | 2.704512      | 1.910415      | 5.657484      |
| 13   | O  | 6.763750      | 0.000000      | 1.913077      |
| 14   | O  | 6.849590      | 0.057730      | 5.745816      |
| 15   | O  | 9.469250      | 1.913077      | 0.000000      |
| 16   | O  | 9.433334      | 1.917308      | 3.859507      |
| 17   | O  | 9.469250      | 0.000000      | 1.913077      |
| 18   | O  | 9.376624      | 0.094304      | 5.749164      |
| 19   | O  | 6.763750      | 1.913077      | 0.000000      |
| 20   | O  | 6.805678      | 1.912071      | 3.870160      |
| 21   | Ce | 5.411000      | 0.000000      | 0.000000      |
| 22   | Ce | 5.415874      | -0.000650     | 3.945023      |
| 23   | Ce | 8.116500      | 1.913077      | 1.913077      |
| 24   | Zr | 8.126638      | 1.932687      | 5.460218      |
| 25   | O  | 1.352750      | 3.826155      | 1.913077      |
| 26   | O  | 1.412100      | 3.855121      | 5.772796      |
| 27   | O  | 4.058250      | 5.739232      | 0.000000      |
| 28   | O  | 4.003857      | 5.737256      | 3.749152      |
| 29   | O  | 4.058250      | 3.826155      | 1.913077      |
| 30   | O  | 4.003233      | 3.846765      | 5.793433      |
| 31   | O  | 1.352750      | 5.739232      | 0.000000      |
| 32   | O  | 1.409749      | 5.740200      | 3.744927      |
| 33   | Ce | 0.000000      | 3.826155      | 0.000000      |
| 34   | Ce | -0.006401     | 3.824925      | 3.944186      |
| 35   | Zr | 2.705500      | 5.739232      | 1.913077      |
| 36   | Ce | 2.704065      | 5.738077      | 5.597818      |
| 37   | O  | 6.763750      | 3.826155      | 1.913077      |
| 38   | O  | 6.848045      | 3.760931      | 5.730345      |
| 39   | O  | 9.469250      | 5.739232      | 0.000000      |

|    |    |          |          |          |
|----|----|----------|----------|----------|
| 40 | O  | 9.475174 | 5.739200 | 3.911356 |
| 41 | O  | 9.469250 | 3.826155 | 1.913077 |
| 42 | O  | 9.377012 | 3.730791 | 5.751829 |
| 43 | O  | 6.763750 | 5.739232 | 0.000000 |
| 44 | O  | 6.759336 | 5.742114 | 3.897239 |
| 45 | Ce | 5.411000 | 3.826155 | 0.000000 |
| 46 | Ce | 5.417604 | 3.825010 | 3.941934 |
| 47 | Ce | 8.116500 | 5.739232 | 1.913077 |
| 48 | Ce | 8.109291 | 5.745540 | 5.655482 |
| 49 | C  | 6.997139 | 1.873177 | 8.409782 |
| 50 | C  | 6.085607 | 2.998270 | 8.773428 |
| 51 | C  | 8.343871 | 1.916471 | 8.413651 |
| 52 | H  | 5.339739 | 2.662101 | 9.515778 |
| 53 | H  | 5.541388 | 3.348832 | 7.878087 |
| 54 | H  | 6.635175 | 3.851492 | 9.202173 |
| 55 | H  | 8.951739 | 1.043559 | 8.151718 |
| 56 | H  | 8.888429 | 2.824244 | 8.695857 |
| 57 | H  | 6.507390 | 0.945463 | 8.084553 |

**C<sub>sp2</sub>-H of C<sub>3</sub>H<sub>6</sub> adsorbes on Ce<sub>T</sub> site of Ce<sub>0.875</sub>Zr<sub>0.125</sub>O<sub>2</sub> (110) surface**

| ATOM |    | X (Angstroms) | Y (Angstroms) | Z (Angstroms) |
|------|----|---------------|---------------|---------------|
| 1    | O  | 1.352750      | 0.000000      | 1.913077      |
| 2    | O  | 1.406204      | -0.032192     | 5.775129      |
| 3    | O  | 4.058250      | 1.913077      | 0.000000      |
| 4    | O  | 4.059914      | 1.912866      | 3.897198      |
| 5    | O  | 4.058250      | 0.000000      | 1.913077      |
| 6    | O  | 3.994717      | -0.024466     | 5.783333      |
| 7    | O  | 1.352750      | 1.913077      | 0.000000      |
| 8    | O  | 1.345853      | 1.911648      | 3.896449      |
| 9    | Ce | 0.000000      | 0.000000      | 0.000000      |
| 10   | Ce | -0.008420     | -0.002138     | 3.948344      |
| 11   | Ce | 2.705500      | 1.913077      | 1.913077      |
| 12   | Ce | 2.701100      | 1.913213      | 5.660683      |
| 13   | O  | 6.763750      | 0.000000      | 1.913077      |
| 14   | O  | 6.843497      | 0.131723      | 5.754583      |
| 15   | O  | 9.469250      | 1.913077      | 0.000000      |
| 16   | O  | 9.433112      | 1.912800      | 3.849258      |
| 17   | O  | 9.469250      | 0.000000      | 1.913077      |
| 18   | O  | 9.371817      | 0.099834      | 5.753444      |
| 19   | O  | 6.763750      | 1.913077      | 0.000000      |
| 20   | O  | 6.798900      | 1.918315      | 3.837867      |
| 21   | Ce | 5.411000      | 0.000000      | 0.000000      |
| 22   | Ce | 5.419060      | 0.003364      | 3.956076      |
| 23   | Ce | 8.116500      | 1.913077      | 1.913077      |
| 24   | Zr | 8.109484      | 1.910227      | 5.422067      |
| 25   | O  | 1.352750      | 3.826155      | 1.913077      |
| 26   | O  | 1.409506      | 3.853242      | 5.770887      |
| 27   | O  | 4.058250      | 5.739232      | 0.000000      |
| 28   | O  | 4.001383      | 5.738609      | 3.747452      |
| 29   | O  | 4.058250      | 3.826155      | 1.913077      |
| 30   | O  | 3.996787      | 3.851301      | 5.783447      |
| 31   | O  | 1.352750      | 5.739232      | 0.000000      |
| 32   | O  | 1.406305      | 5.736010      | 3.743675      |
| 33   | Ce | 0.000000      | 3.826155      | 0.000000      |
| 34   | Ce | -0.004335     | 3.824445      | 3.943071      |
| 35   | Zr | 2.705500      | 5.739232      | 1.913077      |
| 36   | Ce | 2.698198      | 5.740368      | 5.593995      |
| 37   | O  | 6.763750      | 3.826155      | 1.913077      |

|    |    |          |          |          |
|----|----|----------|----------|----------|
| 38 | O  | 6.848491 | 3.707344 | 5.759660 |
| 39 | O  | 9.469250 | 5.739232 | 0.000000 |
| 40 | O  | 9.476811 | 5.735622 | 3.918615 |
| 41 | O  | 9.469250 | 3.826155 | 1.913077 |
| 42 | O  | 9.372007 | 3.727027 | 5.756675 |
| 43 | O  | 6.763750 | 5.739232 | 0.000000 |
| 44 | O  | 6.757569 | 5.736730 | 3.934195 |
| 45 | Ce | 5.411000 | 3.826155 | 0.000000 |
| 46 | Ce | 5.413291 | 3.825335 | 3.947191 |
| 47 | Ce | 8.116500 | 5.739232 | 1.913077 |
| 48 | Ce | 8.121496 | 5.722253 | 5.690811 |
| 49 | C  | 7.010283 | 5.257296 | 8.854220 |
| 50 | C  | 5.549631 | 5.436413 | 8.586571 |
| 51 | C  | 7.940494 | 6.227220 | 8.800590 |
| 52 | H  | 4.974313 | 5.265624 | 9.516217 |
| 53 | H  | 5.203196 | 4.696891 | 7.843617 |
| 54 | H  | 5.325502 | 6.447819 | 8.211122 |
| 55 | H  | 8.991366 | 6.027426 | 9.031304 |
| 56 | H  | 7.670379 | 7.256928 | 8.545015 |
| 57 | H  | 7.328650 | 4.241077 | 9.119358 |

**C<sub>sp2</sub>-H of C<sub>3</sub>H<sub>6</sub> adsorbes on Zr<sub>T</sub> site of Ce<sub>0.875</sub>Zr<sub>0.125</sub>O<sub>2</sub> (110) surface**

| ATOM |    | X (Angstroms) | Y (Angstroms) | Z (Angstroms) |
|------|----|---------------|---------------|---------------|
| 1    | O  | 1.352750      | 0.000000      | 1.913077      |
| 2    | O  | 1.411718      | -0.027633     | 5.773790      |
| 3    | O  | 4.058250      | 1.913077      | 0.000000      |
| 4    | O  | 4.061914      | 1.912396      | 3.892092      |
| 5    | O  | 4.058250      | 0.000000      | 1.913077      |
| 6    | O  | 4.000388      | -0.025533     | 5.780155      |
| 7    | O  | 1.352750      | 1.913077      | 0.000000      |
| 8    | O  | 1.353019      | 1.913371      | 3.892032      |
| 9    | Ce | 0.000000      | 0.000000      | 0.000000      |
| 10   | Ce | -0.006247     | 0.004450      | 3.944817      |
| 11   | Ce | 2.705500      | 1.913077      | 1.913077      |
| 12   | Ce | 2.704423      | 1.911984      | 5.655190      |
| 13   | O  | 6.763750      | 0.000000      | 1.913077      |
| 14   | O  | 6.851149      | 0.047958      | 5.756776      |
| 15   | O  | 9.469250      | 1.913077      | 0.000000      |
| 16   | O  | 9.439412      | 1.920695      | 3.849564      |
| 17   | O  | 9.469250      | 0.000000      | 1.913077      |
| 18   | O  | 9.380656      | 0.111147      | 5.735424      |
| 19   | O  | 6.763750      | 1.913077      | 0.000000      |
| 20   | O  | 6.810036      | 1.909185      | 3.877385      |
| 21   | Ce | 5.411000      | 0.000000      | 0.000000      |
| 22   | Ce | 5.419804      | 0.001654      | 3.949263      |
| 23   | Ce | 8.116500      | 1.913077      | 1.913077      |
| 24   | Zr | 8.144942      | 1.928677      | 5.463716      |
| 25   | O  | 1.352750      | 3.826155      | 1.913077      |
| 26   | O  | 1.408856      | 3.857170      | 5.774281      |
| 27   | O  | 4.058250      | 5.739232      | 0.000000      |
| 28   | O  | 4.003253      | 5.737857      | 3.746563      |
| 29   | O  | 4.058250      | 3.826155      | 1.913077      |
| 30   | O  | 3.999568      | 3.846156      | 5.785067      |
| 31   | O  | 1.352750      | 5.739232      | 0.000000      |
| 32   | O  | 1.409292      | 5.738591      | 3.743993      |
| 33   | Ce | 0.000000      | 3.826155      | 0.000000      |
| 34   | Ce | -0.003396     | 3.825542      | 3.944117      |
| 35   | Zr | 2.705500      | 5.739232      | 1.913077      |

|    |    |          |          |          |
|----|----|----------|----------|----------|
| 36 | Ce | 2.706081 | 5.737656 | 5.593865 |
| 37 | O  | 6.763750 | 3.826155 | 1.913077 |
| 38 | O  | 6.842255 | 3.778387 | 5.734208 |
| 39 | O  | 9.469250 | 5.739232 | 0.000000 |
| 40 | O  | 9.475196 | 5.736905 | 3.914392 |
| 41 | O  | 9.469250 | 3.826155 | 1.913077 |
| 42 | O  | 9.372915 | 3.717961 | 5.756455 |
| 43 | O  | 6.763750 | 5.739232 | 0.000000 |
| 44 | O  | 6.759891 | 5.745646 | 3.893384 |
| 45 | Ce | 5.411000 | 3.826155 | 0.000000 |
| 46 | Ce | 5.415427 | 3.823899 | 3.941260 |
| 47 | Ce | 8.116500 | 5.739232 | 1.913077 |
| 48 | Ce | 8.103649 | 5.747294 | 5.650560 |
| 49 | C  | 7.246660 | 2.418715 | 8.448489 |
| 50 | C  | 5.821883 | 1.970380 | 8.432623 |
| 51 | C  | 8.331217 | 1.622872 | 8.377612 |
| 52 | H  | 5.245290 | 2.614775 | 7.748021 |
| 53 | H  | 5.381660 | 2.071458 | 9.443082 |
| 54 | H  | 5.725489 | 0.926830 | 8.095498 |
| 55 | H  | 9.344502 | 2.030055 | 8.420332 |
| 56 | H  | 8.232817 | 0.536490 | 8.312419 |
| 57 | H  | 7.401972 | 3.500972 | 8.528465 |

**C=C of C<sub>3</sub>H<sub>6</sub> adsorbes on O<sub>T</sub> site of Ce<sub>0.875</sub>Zr<sub>0.125</sub>O<sub>2</sub> (110) surface**

| ATOM |    | X (Angstroms) | Y (Angstroms) | Z (Angstroms) |
|------|----|---------------|---------------|---------------|
| 1    | O  | 1.352750      | 0.000000      | 1.913077      |
| 2    | O  | 1.410163      | -0.029180     | 5.776530      |
| 3    | O  | 4.058250      | 1.913077      | 0.000000      |
| 4    | O  | 4.060803      | 1.917015      | 3.898494      |
| 5    | O  | 4.058250      | 0.000000      | 1.913077      |
| 6    | O  | 3.997322      | -0.024879     | 5.779044      |
| 7    | O  | 1.352750      | 1.913077      | 0.000000      |
| 8    | O  | 1.347361      | 1.911421      | 3.895659      |
| 9    | Ce | 0.000000      | 0.000000      | 0.000000      |
| 10   | Ce | -0.007969     | -0.001037     | 3.949546      |
| 11   | Ce | 2.705500      | 1.913077      | 1.913077      |
| 12   | Ce | 2.702883      | 1.913234      | 5.659713      |
| 13   | O  | 6.763750      | 0.000000      | 1.913077      |
| 14   | O  | 6.847975      | 0.128439      | 5.754550      |
| 15   | O  | 9.469250      | 1.913077      | 0.000000      |
| 16   | O  | 9.431638      | 1.911199      | 3.846076      |
| 17   | O  | 9.469250      | 0.000000      | 1.913077      |
| 18   | O  | 9.375142      | 0.097626      | 5.754968      |
| 19   | O  | 6.763750      | 1.913077      | 0.000000      |
| 20   | O  | 6.797714      | 1.914512      | 3.835045      |
| 21   | Ce | 5.411000      | 0.000000      | 0.000000      |
| 22   | Ce | 5.416526      | 0.001066      | 3.952245      |
| 23   | Ce | 8.116500      | 1.913077      | 1.913077      |
| 24   | Zr | 8.106460      | 1.912086      | 5.418779      |
| 25   | O  | 1.352750      | 3.826155      | 1.913077      |
| 26   | O  | 1.412422      | 3.852346      | 5.772882      |
| 27   | O  | 4.058250      | 5.739232      | 0.000000      |
| 28   | O  | 4.003374      | 5.738371      | 3.747224      |
| 29   | O  | 4.058250      | 3.826155      | 1.913077      |
| 30   | O  | 4.001997      | 3.858777      | 5.786593      |
| 31   | O  | 1.352750      | 5.739232      | 0.000000      |
| 32   | O  | 1.407739      | 5.739856      | 3.743536      |
| 33   | Ce | 0.000000      | 3.826155      | 0.000000      |

|    |    |           |          |          |
|----|----|-----------|----------|----------|
| 34 | Ce | -0.005260 | 3.825103 | 3.945015 |
| 35 | Zr | 2.705500  | 5.739232 | 1.913077 |
| 36 | Ce | 2.700307  | 5.740523 | 5.594600 |
| 37 | O  | 6.763750  | 3.826155 | 1.913077 |
| 38 | O  | 6.853082  | 3.697375 | 5.757035 |
| 39 | O  | 9.469250  | 5.739232 | 0.000000 |
| 40 | O  | 9.476228  | 5.738491 | 3.919204 |
| 41 | O  | 9.469250  | 3.826155 | 1.913077 |
| 42 | O  | 9.378552  | 3.728051 | 5.749695 |
| 43 | O  | 6.763750  | 5.739232 | 0.000000 |
| 44 | O  | 6.758858  | 5.736140 | 3.934063 |
| 45 | Ce | 5.411000  | 3.826155 | 0.000000 |
| 46 | Ce | 5.415304  | 3.825415 | 3.945578 |
| 47 | Ce | 8.116500  | 5.739232 | 1.913077 |
| 48 | Ce | 8.127830  | 5.729046 | 5.691955 |
| 49 | C  | 7.090721  | 5.109612 | 8.824039 |
| 50 | C  | 5.649106  | 5.424087 | 8.585326 |
| 51 | C  | 8.103465  | 5.995820 | 8.823065 |
| 52 | H  | 5.052191  | 5.159622 | 9.478598 |
| 53 | H  | 5.264808  | 4.812240 | 7.748283 |
| 54 | H  | 5.492551  | 6.488954 | 8.352136 |
| 55 | H  | 9.134652  | 5.684495 | 9.016967 |
| 56 | H  | 7.926651  | 7.065298 | 8.663879 |
| 57 | H  | 7.323727  | 4.052395 | 9.002501 |

**C=C of C<sub>3</sub>H<sub>6</sub> adsorbes on Ce<sub>T</sub> site of Ce<sub>0.875</sub>Zr<sub>0.125</sub>O<sub>2</sub> (110) surface**

| ATOM |    | X (Angstroms) | Y (Angstroms) | Z (Angstroms) |
|------|----|---------------|---------------|---------------|
| 1    | O  | 1.352750      | 0.000000      | 1.913077      |
| 2    | O  | 1.414886      | -0.024050     | 5.778470      |
| 3    | O  | 4.058250      | 1.913077      | 0.000000      |
| 4    | O  | 4.064744      | 1.914054      | 3.898271      |
| 5    | O  | 4.058250      | 0.000000      | 1.913077      |
| 6    | O  | 4.003688      | -0.024399     | 5.783810      |
| 7    | O  | 1.352750      | 1.913077      | 0.000000      |
| 8    | O  | 1.351626      | 1.914982      | 3.896041      |
| 9    | Ce | 0.000000      | 0.000000      | 0.000000      |
| 10   | Ce | -0.004720     | 0.004009      | 3.948701      |
| 11   | Ce | 2.705500      | 1.913077      | 1.913077      |
| 12   | Ce | 2.706900      | 1.917174      | 5.661430      |
| 13   | O  | 6.763750      | 0.000000      | 1.913077      |
| 14   | O  | 6.857285      | 0.110009      | 5.766227      |
| 15   | O  | 9.469250      | 1.913077      | 0.000000      |
| 16   | O  | 9.435760      | 1.916331      | 3.839796      |
| 17   | O  | 9.469250      | 0.000000      | 1.913077      |
| 18   | O  | 9.383700      | 0.123331      | 5.752292      |
| 19   | O  | 6.763750      | 1.913077      | 0.000000      |
| 20   | O  | 6.801911      | 1.915865      | 3.848805      |
| 21   | Ce | 5.411000      | 0.000000      | 0.000000      |
| 22   | Ce | 5.420249      | 0.001675      | 3.953939      |
| 23   | Ce | 8.116500      | 1.913077      | 1.913077      |
| 24   | Zr | 8.122958      | 1.910481      | 5.422947      |
| 25   | O  | 1.352750      | 3.826155      | 1.913077      |
| 26   | O  | 1.413563      | 3.861509      | 5.778121      |
| 27   | O  | 4.058250      | 5.739232      | 0.000000      |
| 28   | O  | 4.004666      | 5.741698      | 3.743194      |
| 29   | O  | 4.058250      | 3.826155      | 1.913077      |
| 30   | O  | 4.003335      | 3.857834      | 5.775193      |
| 31   | O  | 1.352750      | 5.739232      | 0.000000      |

|    |    |           |          |           |
|----|----|-----------|----------|-----------|
| 32 | O  | 1.411444  | 5.741692 | 3.742789  |
| 33 | Ce | 0.000000  | 3.826155 | 0.000000  |
| 34 | Ce | -0.002650 | 3.827385 | 3.945920  |
| 35 | Zr | 2.705500  | 5.739232 | 1.913077  |
| 36 | Ce | 2.706961  | 5.742375 | 5.593916  |
| 37 | O  | 6.763750  | 3.826155 | 1.913077  |
| 38 | O  | 6.860064  | 3.723500 | 5.768299  |
| 39 | O  | 9.469250  | 5.739232 | 0.000000  |
| 40 | O  | 9.481088  | 5.738782 | 3.931264  |
| 41 | O  | 9.469250  | 3.826155 | 1.913077  |
| 42 | O  | 9.381485  | 3.713707 | 5.755311  |
| 43 | O  | 6.763750  | 5.739232 | 0.000000  |
| 44 | O  | 6.758500  | 5.741596 | 3.929168  |
| 45 | Ce | 5.411000  | 3.826155 | 0.000000  |
| 46 | Ce | 5.417614  | 3.828120 | 3.950445  |
| 47 | Ce | 8.116500  | 5.739232 | 1.913077  |
| 48 | Ce | 8.121430  | 5.730760 | 5.693025  |
| 49 | C  | 8.066998  | 6.240220 | 8.987570  |
| 50 | C  | 6.602368  | 6.037642 | 9.228296  |
| 51 | C  | 8.960763  | 5.266515 | 8.744362  |
| 52 | H  | 6.002213  | 6.650107 | 8.533394  |
| 53 | H  | 6.334388  | 6.357119 | 10.251938 |
| 54 | H  | 6.311176  | 4.981870 | 9.108524  |
| 55 | H  | 10.019313 | 5.487026 | 8.579352  |
| 56 | H  | 8.666938  | 4.212655 | 8.710842  |
| 57 | H  | 8.419048  | 7.279476 | 9.010262  |

**C=C of C<sub>3</sub>H<sub>6</sub> adsorbes on Zr<sub>T</sub> site of Ce<sub>0.875</sub>Zr<sub>0.125</sub>O<sub>2</sub> (110) surface**

| ATOM |    | X (Angstroms) | Y (Angstroms) | Z (Angstroms) |
|------|----|---------------|---------------|---------------|
| 1    | O  | 1.352750      | 0.000000      | 1.913077      |
| 2    | O  | 1.407862      | -0.023099     | 5.779747      |
| 3    | O  | 4.058250      | 1.913077      | 0.000000      |
| 4    | O  | 4.049855      | 1.913313      | 3.895115      |
| 5    | O  | 4.058250      | 0.000000      | 1.913077      |
| 6    | O  | 4.000248      | -0.023614     | 5.796071      |
| 7    | O  | 1.352750      | 1.913077      | 0.000000      |
| 8    | O  | 1.349466      | 1.913385      | 3.891391      |
| 9    | Ce | 0.000000      | 0.000000      | 0.000000      |
| 10   | Ce | -0.007596     | 0.002513      | 3.949428      |
| 11   | Ce | 2.705500      | 1.913077      | 1.913077      |
| 12   | Ce | 2.698977      | 1.914398      | 5.657622      |
| 13   | O  | 6.763750      | 0.000000      | 1.913077      |
| 14   | O  | 6.844410      | 0.100702      | 5.736853      |
| 15   | O  | 9.469250      | 1.913077      | 0.000000      |
| 16   | O  | 9.424905      | 1.909446      | 3.873300      |
| 17   | O  | 9.469250      | 0.000000      | 1.913077      |
| 18   | O  | 9.372618      | 0.061632      | 5.747801      |
| 19   | O  | 6.763750      | 1.913077      | 0.000000      |
| 20   | O  | 6.792254      | 1.914036      | 3.853752      |
| 21   | Ce | 5.411000      | 0.000000      | 0.000000      |
| 22   | Ce | 5.413318      | 0.003865      | 3.945367      |
| 23   | Ce | 8.116500      | 1.913077      | 1.913077      |
| 24   | Zr | 8.094992      | 1.899040      | 5.459497      |
| 25   | O  | 1.352750      | 3.826155      | 1.913077      |
| 26   | O  | 1.407546      | 3.852154      | 5.778166      |
| 27   | O  | 4.058250      | 5.739232      | 0.000000      |
| 28   | O  | 4.002102      | 5.744932      | 3.747518      |
| 29   | O  | 4.058250      | 3.826155      | 1.913077      |



|    |    |           |          |          |
|----|----|-----------|----------|----------|
| 30 | O  | 3.998042  | 3.860258 | 5.778183 |
| 31 | O  | 1.352750  | 5.739232 | 0.000000 |
| 32 | O  | 1.407554  | 5.739721 | 3.748415 |
| 33 | Ce | 0.000000  | 3.826155 | 0.000000 |
| 34 | Ce | -0.004834 | 3.823475 | 3.943226 |
| 35 | Zr | 2.705500  | 5.739232 | 1.913077 |
| 36 | Ce | 2.703821  | 5.740752 | 5.600747 |
| 37 | O  | 6.763750  | 3.826155 | 1.913077 |
| 38 | O  | 6.848949  | 3.729293 | 5.741841 |
| 39 | O  | 9.469250  | 5.739232 | 0.000000 |
| 40 | O  | 9.477202  | 5.737323 | 3.896274 |
| 41 | O  | 9.469250  | 3.826155 | 1.913077 |
| 42 | O  | 9.380478  | 3.766501 | 5.738435 |
| 43 | O  | 6.763750  | 5.739232 | 0.000000 |
| 44 | O  | 6.757004  | 5.735632 | 3.909123 |
| 45 | Ce | 5.411000  | 3.826155 | 0.000000 |
| 46 | Ce | 5.411759  | 3.824742 | 3.943468 |
| 47 | Ce | 8.116500  | 5.739232 | 1.913077 |
| 48 | Ce | 8.130336  | 5.721797 | 5.647929 |
| 49 | C  | 7.480847  | 1.283901 | 8.526399 |
| 50 | C  | 6.007971  | 1.432410 | 8.722919 |
| 51 | C  | 8.364577  | 2.286976 | 8.372015 |
| 52 | H  | 5.705876  | 0.993668 | 9.692398 |
| 53 | H  | 5.473251  | 0.883224 | 7.928430 |
| 54 | H  | 5.698906  | 2.488580 | 8.699372 |
| 55 | H  | 9.436174  | 2.101193 | 8.255156 |
| 56 | H  | 8.039434  | 3.330184 | 8.389613 |
| 57 | H  | 7.860550  | 0.256215 | 8.513358 |

**TS1-1**

| X (Angstroms) | Y (Angstroms) | Z (Angstroms) |
|---------------|---------------|---------------|
| 1.352750000   | 0.000000000   | 1.913077397   |
| 1.382005070   | -0.025729418  | 5.746544124   |
| 4.058250000   | 1.913077397   | 0.000000000   |
| 4.045334660   | 1.911455257   | 3.893981266   |
| 4.058250000   | 0.000000000   | 1.913077397   |
| 3.975632276   | -0.032935483  | 5.771135007   |
| 1.352750000   | 1.913077397   | 0.000000000   |
| 1.328269035   | 1.925712181   | 3.895083091   |
| 0.000000000   | 0.000000000   | 0.000000000   |
| -0.019066962  | -0.004898912  | 3.938269102   |
| 2.705500000   | 1.913077397   | 1.913077397   |
| 2.699037101   | 1.904286768   | 5.666150801   |
| 6.763750000   | 0.000000000   | 1.913077397   |
| 6.833149077   | 0.180985876   | 5.779839499   |
| 9.469250000   | 1.913077397   | 0.000000000   |
| 9.408126752   | 2.001671689   | 3.920566897   |
| 9.469250000   | 0.000000000   | 1.913077397   |
| 9.358735930   | 0.079997110   | 5.723864973   |
| 6.763750000   | 1.913077397   | 0.000000000   |
| 6.772428911   | 1.892778577   | 3.830215608   |
| 5.411000000   | 0.000000000   | 0.000000000   |
| 5.392383012   | 0.000874651   | 3.914217029   |
| 8.116500000   | 1.913077397   | 1.913077397   |
| 8.046072021   | 1.867790534   | 5.470845105   |
| 1.352750000   | 3.826154793   | 1.913077397   |
| 1.392226963   | 3.870831616   | 5.801773057   |
| 4.058250000   | 5.739232190   | 0.000000000   |

|              |             |             |
|--------------|-------------|-------------|
| 3.977624917  | 5.739658783 | 3.739353384 |
| 4.058250000  | 3.826154793 | 1.913077397 |
| 3.991906892  | 3.854523305 | 5.763382367 |
| 1.352750000  | 5.739232190 | 0.000000000 |
| 1.385827544  | 5.727613862 | 3.745542637 |
| 0.000000000  | 3.826154793 | 0.000000000 |
| 0.037184384  | 3.824692705 | 3.920610951 |
| 2.705500000  | 5.739232190 | 1.913077397 |
| 2.701377099  | 5.744604479 | 5.607873449 |
| 6.763750000  | 3.826154793 | 1.913077397 |
| 6.962827180  | 3.704914808 | 5.681560487 |
| 9.469250000  | 5.739232190 | 0.000000000 |
| 9.470284224  | 5.660529367 | 3.989497577 |
| 9.469250000  | 3.826154793 | 1.913077397 |
| 9.474398980  | 3.606656115 | 6.220171988 |
| 6.763750000  | 5.739232190 | 0.000000000 |
| 6.731218216  | 5.773718054 | 3.943623790 |
| 5.411000000  | 3.826154793 | 0.000000000 |
| 5.424384580  | 3.831587779 | 3.935650069 |
| 8.116500000  | 5.739232190 | 1.913077397 |
| 8.074886820  | 5.843721988 | 5.768559377 |
| 8.358484589  | 6.150156035 | 8.728508849 |
| 9.407156705  | 5.234561158 | 8.804868951 |
| 7.034118761  | 5.874565235 | 8.457777362 |
| 10.354477630 | 5.570011551 | 9.218540001 |
| 10.039568317 | 4.145891096 | 6.811852232 |
| 9.171491135  | 4.177448906 | 8.964799496 |
| 6.274363689  | 6.665245362 | 8.482090496 |
| 6.668819602  | 4.836061339 | 8.409269463 |
| 8.632999459  | 7.210169273 | 8.831092962 |

**CH<sub>2</sub>=CHCH<sub>2</sub>\***

| ATOM |    | X (Angstroms) | Y (Angstroms) | Z (Angstroms) |
|------|----|---------------|---------------|---------------|
| 1    | O  | 1.352750      | 0.000000      | 1.913077      |
| 2    | O  | 1.383234      | -0.030153     | 5.754257      |
| 3    | O  | 4.058250      | 1.913077      | 0.000000      |
| 4    | O  | 4.049584      | 1.915656      | 3.895181      |
| 5    | O  | 4.058250      | 0.000000      | 1.913077      |
| 6    | O  | 3.969060      | -0.039997     | 5.777395      |
| 7    | O  | 1.352750      | 1.913077      | 0.000000      |
| 8    | O  | 1.335947      | 1.919211      | 3.875845      |
| 9    | Ce | 0.000000      | 0.000000      | 0.000000      |
| 10   | Ce | -0.023875     | -0.006393     | 3.938346      |
| 11   | Ce | 2.705500      | 1.913077      | 1.913077      |
| 12   | Ce | 2.697877      | 1.904437      | 5.653590      |
| 13   | O  | 6.763750      | 0.000000      | 1.913077      |
| 14   | O  | 6.813686      | 0.191087      | 5.786246      |
| 15   | O  | 9.469250      | 1.913077      | 0.000000      |
| 16   | O  | 9.411722      | 1.970052      | 3.869032      |
| 17   | O  | 9.469250      | 0.000000      | 1.913077      |
| 18   | O  | 9.354671      | 0.110057      | 5.731939      |
| 19   | O  | 6.763750      | 1.913077      | 0.000000      |
| 20   | O  | 6.769575      | 1.891309      | 3.814310      |
| 21   | Ce | 5.411000      | 0.000000      | 0.000000      |
| 22   | Ce | 5.387412      | 0.000331      | 3.914411      |
| 23   | Ce | 8.116500      | 1.913077      | 1.913077      |
| 24   | Zr | 8.051593      | 1.860700      | 5.437696      |
| 25   | O  | 1.352750      | 3.826155      | 1.913077      |

|    |    |           |          |          |
|----|----|-----------|----------|----------|
| 26 | O  | 1.329680  | 3.838854 | 5.799959 |
| 27 | O  | 4.058250  | 5.739232 | 0.000000 |
| 28 | O  | 3.983213  | 5.736871 | 3.738923 |
| 29 | O  | 4.058250  | 3.826155 | 1.913077 |
| 30 | O  | 3.976906  | 3.863079 | 5.768741 |
| 31 | O  | 1.352750  | 5.739232 | 0.000000 |
| 32 | O  | 1.396199  | 5.728952 | 3.728090 |
| 33 | Ce | 0.000000  | 3.826155 | 0.000000 |
| 34 | Ce | 0.025602  | 3.829782 | 3.842034 |
| 35 | Zr | 2.705500  | 5.739232 | 1.913077 |
| 36 | Ce | 2.688631  | 5.737651 | 5.600383 |
| 37 | O  | 6.763750  | 3.826155 | 1.913077 |
| 38 | O  | 6.959495  | 3.705277 | 5.678583 |
| 39 | O  | 9.469250  | 5.739232 | 0.000000 |
| 40 | O  | 9.475259  | 5.671087 | 3.989239 |
| 41 | O  | 9.469250  | 3.826155 | 1.913077 |
| 42 | O  | 9.454258  | 3.534189 | 6.135236 |
| 43 | O  | 6.763750  | 5.739232 | 0.000000 |
| 44 | O  | 6.739533  | 5.781357 | 3.947877 |
| 45 | Ce | 5.411000  | 3.826155 | 0.000000 |
| 46 | Ce | 5.432204  | 3.839349 | 3.941276 |
| 47 | Ce | 8.116500  | 5.739232 | 1.913077 |
| 48 | Ce | 8.076688  | 5.853890 | 5.786290 |
| 49 | C  | 8.028414  | 6.435137 | 8.657980 |
| 50 | C  | 9.209340  | 5.704919 | 8.608634 |
| 51 | C  | 6.754022  | 5.946428 | 8.380140 |
| 52 | H  | 10.173945 | 6.198683 | 8.737280 |
| 53 | H  | 10.376232 | 3.476707 | 6.487461 |
| 54 | H  | 9.200825  | 4.615999 | 8.516911 |
| 55 | H  | 5.893916  | 6.617199 | 8.348101 |
| 56 | H  | 6.562741  | 4.872766 | 8.278064 |
| 57 | H  | 8.126322  | 7.521035 | 8.781292 |

**TS1-2**

| X (Angstroms) | Y (Angstroms) | Z (Angstroms) |
|---------------|---------------|---------------|
| 1.352750000   | 0.000000000   | 1.913077397   |
| 1.381738288   | -0.024708263  | 5.758583655   |
| 4.058250000   | 1.913077397   | 0.000000000   |
| 4.050798572   | 1.910218093   | 3.884510201   |
| 4.058250000   | 0.000000000   | 1.913077397   |
| 3.969475732   | -0.055203389  | 5.771304147   |
| 1.352750000   | 1.913077397   | 0.000000000   |
| 1.339473496   | 1.928336097   | 3.871954371   |
| 0.000000000   | 0.000000000   | 0.000000000   |
| -0.006685926  | 0.007535403   | 3.933713707   |
| 2.705500000   | 1.913077397   | 1.913077397   |
| 2.698271951   | 1.889137564   | 5.655373792   |
| 6.763750000   | 0.000000000   | 1.913077397   |
| 6.794688873   | 0.151990054   | 5.840018884   |
| 9.469250000   | 1.913077397   | 0.000000000   |
| 9.413881031   | 2.019430641   | 3.964211577   |
| 9.469250000   | 0.000000000   | 1.913077397   |
| 9.356928180   | 0.123964465   | 5.812105093   |
| 6.763750000   | 1.913077397   | 0.000000000   |
| 6.753244999   | 1.893555794   | 3.860038476   |
| 5.411000000   | 0.000000000   | 0.000000000   |
| 5.370180952   | -0.025017922  | 3.905462645   |
| 8.116500000   | 1.913077397   | 1.913077397   |

|              |             |             |
|--------------|-------------|-------------|
| 7.979276838  | 1.775709512 | 5.473110752 |
| 1.352750000  | 3.826154793 | 1.913077397 |
| 1.408618288  | 3.802450591 | 5.808399209 |
| 4.058250000  | 5.739232190 | 0.000000000 |
| 3.982346079  | 5.727017898 | 3.731773725 |
| 4.058250000  | 3.826154793 | 1.913077397 |
| 4.009193083  | 3.860130076 | 5.756878772 |
| 1.352750000  | 5.739232190 | 0.000000000 |
| 1.404331629  | 5.732402335 | 3.727113529 |
| 0.000000000  | 3.826154793 | 0.000000000 |
| 0.043782416  | 3.864620840 | 3.813417939 |
| 2.705500000  | 5.739232190 | 1.913077397 |
| 2.690384668  | 5.747257711 | 5.605563068 |
| 6.763750000  | 3.826154793 | 1.913077397 |
| 7.267440029  | 3.656313613 | 5.891349786 |
| 9.469250000  | 5.739232190 | 0.000000000 |
| 9.467820229  | 5.701927394 | 3.984600566 |
| 9.469250000  | 3.826154793 | 1.913077397 |
| 9.839924884  | 4.243595654 | 6.591503142 |
| 6.763750000  | 5.739232190 | 0.000000000 |
| 6.729865206  | 5.737516445 | 3.993739200 |
| 5.411000000  | 3.826154793 | 0.000000000 |
| 5.403944170  | 3.836207886 | 3.909435466 |
| 8.116500000  | 5.739232190 | 1.913077397 |
| 8.161203918  | 5.841361854 | 5.812001045 |
| 8.524529200  | 5.714164222 | 8.945549527 |
| 9.484259839  | 4.702526381 | 8.700441437 |
| 7.164699332  | 5.453301034 | 8.952131174 |
| 10.496341898 | 4.854230496 | 9.050901236 |
| 10.816862429 | 4.011062648 | 6.538374118 |
| 9.151070942  | 3.675074497 | 8.551824597 |
| 6.449655322  | 6.206326951 | 9.283302289 |
| 6.780861703  | 4.470383475 | 8.676812798 |
| 8.862650593  | 6.692245121 | 9.270716129 |

**CH<sub>2</sub>=CHCH<sub>2</sub>OH\***

| ATOM |    | X (Angstroms) | Y (Angstroms) | Z (Angstroms) |
|------|----|---------------|---------------|---------------|
| 1    | O  | 1.352750      | 0.000000      | 1.913077      |
| 2    | O  | 1.373162      | -0.014030     | 5.762852      |
| 3    | O  | 4.058250      | 1.913077      | 0.000000      |
| 4    | O  | 4.036874      | 1.898484      | 3.878643      |
| 5    | O  | 4.058250      | 0.000000      | 1.913077      |
| 6    | O  | 3.960985      | -0.062587     | 5.769880      |
| 7    | O  | 1.352750      | 1.913077      | 0.000000      |
| 8    | O  | 1.341753      | 1.938880      | 3.873439      |
| 9    | Ce | 0.000000      | 0.000000      | 0.000000      |
| 10   | Ce | -0.012294     | 0.019850      | 3.957201      |
| 11   | Ce | 2.705500      | 1.913077      | 1.913077      |
| 12   | Ce | 2.699565      | 1.879227      | 5.658797      |
| 13   | O  | 6.763750      | 0.000000      | 1.913077      |
| 14   | O  | 6.756984      | 0.097291      | 5.876835      |
| 15   | O  | 9.469250      | 1.913077      | 0.000000      |
| 16   | O  | 9.414755      | 2.029181      | 3.995901      |
| 17   | O  | 9.469250      | 0.000000      | 1.913077      |
| 18   | O  | 9.342022      | 0.136694      | 5.841219      |
| 19   | O  | 6.763750      | 1.913077      | 0.000000      |
| 20   | O  | 6.719304      | 1.896731      | 3.879268      |
| 21   | Ce | 5.411000      | 0.000000      | 0.000000      |

|    |    |           |           |          |
|----|----|-----------|-----------|----------|
| 22 | Ce | 5.342990  | -0.041990 | 3.887541 |
| 23 | Ce | 8.116500  | 1.913077  | 1.913077 |
| 24 | Zr | 7.970407  | 1.727283  | 5.474041 |
| 25 | O  | 1.352750  | 3.826155  | 1.913077 |
| 26 | O  | 1.222641  | 3.870562  | 5.867893 |
| 27 | O  | 4.058250  | 5.739232  | 0.000000 |
| 28 | O  | 3.970946  | 5.726100  | 3.727879 |
| 29 | O  | 4.058250  | 3.826155  | 1.913077 |
| 30 | O  | 3.999287  | 3.850503  | 5.754761 |
| 31 | O  | 1.352750  | 5.739232  | 0.000000 |
| 32 | O  | 1.406346  | 5.737243  | 3.728041 |
| 33 | Ce | 0.000000  | 3.826155  | 0.000000 |
| 34 | Ce | 0.051057  | 3.849086  | 3.760313 |
| 35 | Zr | 2.705500  | 5.739232  | 1.913077 |
| 36 | Ce | 2.677917  | 5.745084  | 5.616753 |
| 37 | O  | 6.763750  | 3.826155  | 1.913077 |
| 38 | O  | 7.572906  | 3.621028  | 6.060381 |
| 39 | O  | 9.469250  | 5.739232  | 0.000000 |
| 40 | O  | 9.485379  | 5.674928  | 4.068764 |
| 41 | O  | 9.469250  | 3.826155  | 1.913077 |
| 42 | O  | 10.080673 | 4.750186  | 7.145706 |
| 43 | O  | 6.763750  | 5.739232  | 0.000000 |
| 44 | O  | 6.724548  | 5.715687  | 4.018355 |
| 45 | Ce | 5.411000  | 3.826155  | 0.000000 |
| 46 | Ce | 5.373807  | 3.831436  | 3.871343 |
| 47 | Ce | 8.116500  | 5.739232  | 1.913077 |
| 48 | Ce | 8.121815  | 5.916495  | 5.836233 |
| 49 | C  | 8.880595  | 5.132425  | 9.142671 |
| 50 | C  | 9.710554  | 4.137610  | 8.379837 |
| 51 | C  | 7.557259  | 5.026718  | 9.334909 |
| 52 | H  | 10.618883 | 3.874099  | 8.956786 |
| 53 | H  | 10.944141 | 4.305483  | 6.696422 |
| 54 | H  | 9.126531  | 3.215805  | 8.206332 |
| 55 | H  | 6.994845  | 5.801183  | 9.865470 |
| 56 | H  | 6.997241  | 4.163026  | 8.959450 |
| 57 | H  | 9.418515  | 6.022257  | 9.496272 |

IM1

| ATOM |    | X (Angstroms) | Y (Angstroms) | Z (Angstroms) |
|------|----|---------------|---------------|---------------|
| 1    | O  | 1.352750      | 0.000000      | 1.913077      |
| 2    | O  | 1.371854      | -0.029504     | 5.743876      |
| 3    | O  | 4.058250      | 1.913077      | 0.000000      |
| 4    | O  | 4.035242      | 1.922540      | 3.882004      |
| 5    | O  | 4.058250      | 0.000000      | 1.913077      |
| 6    | O  | 3.959114      | -0.032959     | 5.747938      |
| 7    | O  | 1.352750      | 1.913077      | 0.000000      |
| 8    | O  | 1.330677      | 1.905525      | 3.862120      |
| 9    | Ce | 0.000000      | 0.000000      | 0.000000      |
| 10   | Ce | -0.028024     | -0.006330     | 3.948223      |
| 11   | Ce | 2.705500      | 1.913077      | 1.913077      |
| 12   | Ce | 2.702737      | 1.912029      | 5.644241      |
| 13   | O  | 6.763750      | 0.000000      | 1.913077      |
| 14   | O  | 6.770889      | 0.144696      | 5.821799      |
| 15   | O  | 9.469250      | 1.913077      | 0.000000      |
| 16   | O  | 9.402622      | 1.968637      | 3.941673      |
| 17   | O  | 9.469250      | 0.000000      | 1.913077      |
| 18   | O  | 9.316991      | 0.035321      | 5.729414      |
| 19   | O  | 6.763750      | 1.913077      | 0.000000      |

|    |    |          |           |           |
|----|----|----------|-----------|-----------|
| 20 | O  | 6.741287 | 1.861810  | 3.808914  |
| 21 | Ce | 5.411000 | 0.000000  | 0.000000  |
| 22 | Ce | 5.378807 | -0.014299 | 3.867320  |
| 23 | Ce | 8.116500 | 1.913077  | 1.913077  |
| 24 | Zr | 8.011976 | 1.780821  | 5.492509  |
| 25 | O  | 1.352750 | 3.826155  | 1.913077  |
| 26 | O  | 1.424759 | 3.838639  | 5.693399  |
| 27 | O  | 4.058250 | 5.739232  | 0.000000  |
| 28 | O  | 3.965924 | 5.733845  | 3.727939  |
| 29 | O  | 4.058250 | 3.826155  | 1.913077  |
| 30 | O  | 4.008864 | 3.870891  | 5.791882  |
| 31 | O  | 1.352750 | 5.739232  | 0.000000  |
| 32 | O  | 1.384923 | 5.744117  | 3.720293  |
| 33 | Ce | 0.000000 | 3.826155  | 0.000000  |
| 34 | Ce | 0.028030 | 3.829427  | 3.864669  |
| 35 | Zr | 2.705500 | 5.739232  | 1.913077  |
| 36 | Ce | 2.674271 | 5.745171  | 5.590062  |
| 37 | O  | 6.763750 | 3.826155  | 1.913077  |
| 38 | O  | 6.936708 | 3.713270  | 5.635447  |
| 39 | O  | 9.469250 | 5.739232  | 0.000000  |
| 40 | O  | 9.459012 | 5.696492  | 3.944136  |
| 41 | O  | 9.469250 | 3.826155  | 1.913077  |
| 42 | O  | 8.129503 | 4.949418  | 8.188030  |
| 43 | O  | 6.763750 | 5.739232  | 0.000000  |
| 44 | O  | 6.707784 | 5.787103  | 3.910231  |
| 45 | Ce | 5.411000 | 3.826155  | 0.000000  |
| 46 | Ce | 5.407178 | 3.830513  | 3.947532  |
| 47 | Ce | 8.116500 | 5.739232  | 1.913077  |
| 48 | Ce | 8.041059 | 5.847382  | 5.750223  |
| 49 | C  | 6.639066 | 5.842513  | 9.840903  |
| 50 | C  | 6.929412 | 4.679296  | 8.945993  |
| 51 | C  | 5.492986 | 6.532393  | 9.834804  |
| 52 | H  | 7.102782 | 3.772380  | 9.555397  |
| 53 | H  | 8.531557 | 4.052609  | 7.893992  |
| 54 | H  | 6.082508 | 4.473427  | 8.265526  |
| 55 | H  | 5.318367 | 7.369394  | 10.517249 |
| 56 | H  | 4.687749 | 6.290075  | 9.134028  |
| 57 | H  | 7.447306 | 6.121151  | 10.528307 |
| 58 | O  | 9.543675 | 3.993042  | 6.007306  |
| 59 | O  | 9.229300 | 2.936034  | 6.932637  |

**TS1-3**

| X (Angstroms) | Y (Angstroms) | Z (Angstroms) |
|---------------|---------------|---------------|
| 1.352750000   | 0.000000000   | 1.913077397   |
| 1.373436166   | -0.032682833  | 5.737526362   |
| 4.058250000   | 1.913077397   | 0.000000000   |
| 4.038235112   | 1.921190460   | 3.884566086   |
| 4.058250000   | 0.000000000   | 1.913077397   |
| 3.955767640   | -0.035923088  | 5.737973571   |
| 1.352750000   | 1.913077397   | 0.000000000   |
| 1.329198334   | 1.905134741   | 3.859747419   |
| 0.000000000   | 0.000000000   | 0.000000000   |
| -0.040663289  | -0.012956884  | 3.943990955   |
| 2.705500000   | 1.913077397   | 1.913077397   |
| 2.689085704   | 1.910117171   | 5.648494944   |
| 6.763750000   | 0.000000000   | 1.913077397   |
| 6.766718824   | 0.156496060   | 5.825773542   |
| 9.469250000   | 1.913077397   | 0.000000000   |

|             |              |              |
|-------------|--------------|--------------|
| 9.394842732 | 1.962943808  | 3.938840013  |
| 9.469250000 | 0.000000000  | 1.913077397  |
| 9.308784877 | 0.045937642  | 5.733449144  |
| 6.763750000 | 1.913077397  | 0.000000000  |
| 6.750521461 | 1.851812980  | 3.819145710  |
| 5.411000000 | 0.000000000  | 0.000000000  |
| 5.362844389 | -0.010866852 | 3.888175703  |
| 8.116500000 | 1.913077397  | 1.913077397  |
| 8.012376782 | 1.792302700  | 5.499913077  |
| 1.352750000 | 3.826154793  | 1.913077397  |
| 1.435799760 | 3.833264826  | 5.691437750  |
| 4.058250000 | 5.739232190  | 0.000000000  |
| 3.970192651 | 5.731873354  | 3.726527794  |
| 4.058250000 | 3.826154793  | 1.913077397  |
| 4.016909265 | 3.868253024  | 5.783835597  |
| 1.352750000 | 5.739232190  | 0.000000000  |
| 1.387753903 | 5.740355887  | 3.716313783  |
| 0.000000000 | 3.826154793  | 0.000000000  |
| 0.033820242 | 3.836359124  | 3.862230611  |
| 2.705500000 | 5.739232190  | 1.913077397  |
| 2.688365192 | 5.738196910  | 5.587950971  |
| 6.763750000 | 3.826154793  | 1.913077397  |
| 6.953344768 | 3.679672264  | 5.647237312  |
| 9.469250000 | 5.739232190  | 0.000000000  |
| 9.457509907 | 5.692861134  | 3.941363318  |
| 9.469250000 | 3.826154793  | 1.913077397  |
| 8.102911422 | 4.941427860  | 8.175384066  |
| 6.763750000 | 5.739232190  | 0.000000000  |
| 6.711358880 | 5.782877263  | 3.930646511  |
| 5.411000000 | 3.826154793  | 0.000000000  |
| 5.437054704 | 3.826291099  | 3.947805447  |
| 8.116500000 | 5.739232190  | 1.913077397  |
| 8.037993355 | 5.835928362  | 5.816163385  |
| 6.534184545 | 5.891547867  | 9.852075984  |
| 6.909458988 | 4.730092784  | 8.949235764  |
| 5.343460486 | 6.515740227  | 9.864499825  |
| 7.066720486 | 3.822691231  | 9.568064545  |
| 8.718122272 | 3.894803126  | 7.770650241  |
| 6.069099679 | 4.479924294  | 8.278099992  |
| 5.103749658 | 7.338228163  | 10.526140468 |
| 4.526617793 | 6.230810001  | 9.195140891  |
| 7.325472110 | 6.225599926  | 10.539669471 |
| 9.556821843 | 3.986526523  | 5.975626392  |
| 9.326621683 | 3.116545117  | 7.102289648  |

**CH<sub>2</sub>=CHCH<sub>2</sub>O\***

| ATOM |    | X (Angstroms) | Y (Angstroms) | Z (Angstroms) |
|------|----|---------------|---------------|---------------|
| 1    | O  | 1.352750      | 0.000000      | 1.913077      |
| 2    | O  | 1.368240      | -0.056730     | 5.773630      |
| 3    | O  | 4.058250      | 1.913077      | 0.000000      |
| 4    | O  | 4.042654      | 1.916293      | 3.872590      |
| 5    | O  | 4.058250      | 0.000000      | 1.913077      |
| 6    | O  | 3.946230      | -0.043758     | 5.732819      |
| 7    | O  | 1.352750      | 1.913077      | 0.000000      |
| 8    | O  | 1.323415      | 1.896017      | 3.857907      |
| 9    | Ce | 0.000000      | 0.000000      | 0.000000      |
| 10   | Ce | -0.053036     | -0.020701     | 3.959649      |
| 11   | Ce | 2.705500      | 1.913077      | 1.913077      |

|    |    |           |           |          |
|----|----|-----------|-----------|----------|
| 12 | Ce | 2.700271  | 1.887128  | 5.640388 |
| 13 | O  | 6.763750  | 0.000000  | 1.913077 |
| 14 | O  | 6.704741  | 0.224221  | 5.774043 |
| 15 | O  | 9.469250  | 1.913077  | 0.000000 |
| 16 | O  | 9.397561  | 2.005283  | 3.938436 |
| 17 | O  | 9.469250  | 0.000000  | 1.913077 |
| 18 | O  | 9.302134  | 0.102628  | 5.752853 |
| 19 | O  | 6.763750  | 1.913077  | 0.000000 |
| 20 | O  | 6.743909  | 1.870924  | 3.779477 |
| 21 | Ce | 5.411000  | 0.000000  | 0.000000 |
| 22 | Ce | 5.369342  | -0.019001 | 3.882731 |
| 23 | Ce | 8.116500  | 1.913077  | 1.913077 |
| 24 | Zr | 7.958770  | 1.797135  | 5.457993 |
| 25 | O  | 1.352750  | 3.826155  | 1.913077 |
| 26 | O  | 1.387581  | 3.669401  | 5.850043 |
| 27 | O  | 4.058250  | 5.739232  | 0.000000 |
| 28 | O  | 3.958010  | 5.732175  | 3.737751 |
| 29 | O  | 4.058250  | 3.826155  | 1.913077 |
| 30 | O  | 4.007339  | 3.874496  | 5.740169 |
| 31 | O  | 1.352750  | 5.739232  | 0.000000 |
| 32 | O  | 1.392053  | 5.706889  | 3.760410 |
| 33 | Ce | 0.000000  | 3.826155  | 0.000000 |
| 34 | Ce | 0.020634  | 3.834303  | 3.851180 |
| 35 | Zr | 2.705500  | 5.739232  | 1.913077 |
| 36 | Ce | 2.694769  | 5.738463  | 5.640318 |
| 37 | O  | 6.763750  | 3.826155  | 1.913077 |
| 38 | O  | 6.990642  | 3.630225  | 5.698672 |
| 39 | O  | 9.469250  | 5.739232  | 0.000000 |
| 40 | O  | 9.474389  | 5.717171  | 3.909773 |
| 41 | O  | 9.469250  | 3.826155  | 1.913077 |
| 42 | O  | 7.203851  | 5.729007  | 7.877945 |
| 43 | O  | 6.763750  | 5.739232  | 0.000000 |
| 44 | O  | 6.697364  | 5.772522  | 3.952400 |
| 45 | Ce | 5.411000  | 3.826155  | 0.000000 |
| 46 | Ce | 5.414728  | 3.830501  | 3.962006 |
| 47 | Ce | 8.116500  | 5.739232  | 1.913077 |
| 48 | Ce | 7.984313  | 5.893861  | 5.859372 |
| 49 | C  | 4.891404  | 6.047851  | 8.555406 |
| 50 | C  | 6.120385  | 5.170423  | 8.561602 |
| 51 | C  | 3.627102  | 5.613425  | 8.715608 |
| 52 | H  | 6.409013  | 5.018381  | 9.628551 |
| 53 | H  | 10.613513 | 2.851052  | 6.802936 |
| 54 | H  | 5.865904  | 4.170279  | 8.154292 |
| 55 | H  | 2.791765  | 6.315965  | 8.818287 |
| 56 | H  | 3.402814  | 4.550255  | 8.856959 |
| 57 | H  | 5.093978  | 7.116539  | 8.419500 |
| 58 | O  | 9.660639  | 4.228783  | 5.976995 |
| 59 | O  | 9.628404  | 3.034398  | 6.822069 |

**CH<sub>2</sub>=CHCHO\***

| ATOM |   | X (Angstroms) | Y (Angstroms) | Z (Angstroms) |
|------|---|---------------|---------------|---------------|
| 1    | O | 1.352750      | 0.000000      | 1.913077      |
| 2    | O | 1.407045      | -0.054434     | 5.754571      |
| 3    | O | 4.058250      | 1.913077      | 0.000000      |
| 4    | O | 4.073606      | 1.904575      | 3.871653      |
| 5    | O | 4.058250      | 0.000000      | 1.913077      |
| 6    | O | 4.013830      | -0.069300     | 5.784805      |
| 7    | O | 1.352750      | 1.913077      | 0.000000      |



|    |    |           |           |           |
|----|----|-----------|-----------|-----------|
| 8  | O  | 1.357331  | 1.919866  | 3.865109  |
| 9  | Ce | 0.000000  | 0.000000  | 0.000000  |
| 10 | Ce | -0.009370 | -0.010007 | 3.886510  |
| 11 | Ce | 2.705500  | 1.913077  | 1.913077  |
| 12 | Ce | 2.708644  | 1.873078  | 5.642128  |
| 13 | O  | 6.763750  | 0.000000  | 1.913077  |
| 14 | O  | 6.822656  | 0.211375  | 5.850122  |
| 15 | O  | 9.469250  | 1.913077  | 0.000000  |
| 16 | O  | 9.443057  | 1.931841  | 3.921491  |
| 17 | O  | 9.469250  | 0.000000  | 1.913077  |
| 18 | O  | 9.371603  | 0.138450  | 5.842198  |
| 19 | O  | 6.763750  | 1.913077  | 0.000000  |
| 20 | O  | 6.819696  | 1.950811  | 3.900079  |
| 21 | Ce | 5.411000  | 0.000000  | 0.000000  |
| 22 | Ce | 5.376365  | -0.014543 | 3.878028  |
| 23 | Ce | 8.116500  | 1.913077  | 1.913077  |
| 24 | Zr | 8.117582  | 1.809383  | 5.521647  |
| 25 | O  | 1.352750  | 3.826155  | 1.913077  |
| 26 | O  | 1.293083  | 3.746403  | 5.900844  |
| 27 | O  | 4.058250  | 5.739232  | 0.000000  |
| 28 | O  | 3.982292  | 5.729605  | 3.729840  |
| 29 | O  | 4.058250  | 3.826155  | 1.913077  |
| 30 | O  | 4.037035  | 3.843469  | 5.794074  |
| 31 | O  | 1.352750  | 5.739232  | 0.000000  |
| 32 | O  | 1.405058  | 5.706970  | 3.745513  |
| 33 | Ce | 0.000000  | 3.826155  | 0.000000  |
| 34 | Ce | 0.021426  | 3.836301  | 3.825699  |
| 35 | Zr | 2.705500  | 5.739232  | 1.913077  |
| 36 | Ce | 2.688150  | 5.737288  | 5.624071  |
| 37 | O  | 6.763750  | 3.826155  | 1.913077  |
| 38 | O  | 6.819211  | 3.521733  | 6.186613  |
| 39 | O  | 9.469250  | 5.739232  | 0.000000  |
| 40 | O  | 9.457219  | 5.750914  | 3.974729  |
| 41 | O  | 9.469250  | 3.826155  | 1.913077  |
| 42 | O  | 7.608861  | 5.915898  | 8.378377  |
| 43 | O  | 6.763750  | 5.739232  | 0.000000  |
| 44 | O  | 6.727942  | 5.715622  | 4.052545  |
| 45 | Ce | 5.411000  | 3.826155  | 0.000000  |
| 46 | Ce | 5.394398  | 3.827992  | 3.863797  |
| 47 | Ce | 8.116500  | 5.739232  | 1.913077  |
| 48 | Ce | 8.083324  | 6.008448  | 5.837690  |
| 49 | C  | 5.469356  | 6.908527  | 8.773506  |
| 50 | C  | 6.662508  | 6.180557  | 9.145858  |
| 51 | C  | 4.462689  | 7.087415  | 9.661367  |
| 52 | H  | 6.726966  | 5.835242  | 10.202807 |
| 53 | H  | 10.840776 | 3.241456  | 6.708882  |
| 54 | H  | 5.908679  | 3.434374  | 6.556939  |
| 55 | H  | 3.550662  | 7.629324  | 9.397899  |
| 56 | H  | 4.520915  | 6.693254  | 10.681884 |
| 57 | H  | 5.415410  | 7.300458  | 7.750120  |
| 58 | O  | 9.321871  | 3.869731  | 5.791739  |
| 59 | O  | 9.823420  | 3.098394  | 6.935991  |

IM2

| ATOM |   | X (Angstroms) | Y (Angstroms) | Z (Angstroms) |
|------|---|---------------|---------------|---------------|
| 1    | O | 1.352750      | 0.000000      | 1.913077      |
| 2    | O | 1.402500      | -0.039714     | 5.767231      |
| 3    | O | 4.058250      | 1.913077      | 0.000000      |

|    |    |           |           |           |
|----|----|-----------|-----------|-----------|
| 4  | O  | 4.041905  | 1.894057  | 3.877224  |
| 5  | O  | 4.058250  | 0.000000  | 1.913077  |
| 6  | O  | 3.994217  | -0.053892 | 5.777733  |
| 7  | O  | 1.352750  | 1.913077  | 0.000000  |
| 8  | O  | 1.327803  | 1.905405  | 3.907519  |
| 9  | Ce | 0.000000  | 0.000000  | 0.000000  |
| 10 | Ce | -0.019433 | -0.018673 | 3.936532  |
| 11 | Ce | 2.705500  | 1.913077  | 1.913077  |
| 12 | Ce | 2.701044  | 1.888993  | 5.642106  |
| 13 | O  | 6.763750  | 0.000000  | 1.913077  |
| 14 | O  | 6.809333  | 0.120139  | 5.767933  |
| 15 | O  | 9.469250  | 1.913077  | 0.000000  |
| 16 | O  | 9.396103  | 1.935595  | 3.892573  |
| 17 | O  | 9.469250  | 0.000000  | 1.913077  |
| 18 | O  | 9.361295  | 0.034680  | 5.717366  |
| 19 | O  | 6.763750  | 1.913077  | 0.000000  |
| 20 | O  | 6.748609  | 1.867305  | 3.815242  |
| 21 | Ce | 5.411000  | 0.000000  | 0.000000  |
| 22 | Ce | 5.411547  | -0.043844 | 3.876690  |
| 23 | Ce | 8.116500  | 1.913077  | 1.913077  |
| 24 | Zr | 8.032478  | 1.792138  | 5.465725  |
| 25 | O  | 1.352750  | 3.826155  | 1.913077  |
| 26 | O  | 1.434125  | 3.851495  | 5.752704  |
| 27 | O  | 4.058250  | 5.739232  | 0.000000  |
| 28 | O  | 3.991696  | 5.726233  | 3.732892  |
| 29 | O  | 4.058250  | 3.826155  | 1.913077  |
| 30 | O  | 4.017178  | 3.842936  | 5.782214  |
| 31 | O  | 1.352750  | 5.739232  | 0.000000  |
| 32 | O  | 1.405906  | 5.741033  | 3.728763  |
| 33 | Ce | 0.000000  | 3.826155  | 0.000000  |
| 34 | Ce | 0.000139  | 3.846624  | 3.907509  |
| 35 | Zr | 2.705500  | 5.739232  | 1.913077  |
| 36 | Ce | 2.705726  | 5.727014  | 5.595217  |
| 37 | O  | 6.763750  | 3.826155  | 1.913077  |
| 38 | O  | 6.891766  | 3.672852  | 5.700121  |
| 39 | O  | 9.469250  | 5.739232  | 0.000000  |
| 40 | O  | 9.474151  | 5.730406  | 3.895027  |
| 41 | O  | 9.469250  | 3.826155  | 1.913077  |
| 42 | O  | 7.507142  | 5.445160  | 8.327249  |
| 43 | O  | 6.763750  | 5.739232  | 0.000000  |
| 44 | O  | 6.753521  | 5.737734  | 3.917685  |
| 45 | Ce | 5.411000  | 3.826155  | 0.000000  |
| 46 | Ce | 5.408854  | 3.811161  | 3.952622  |
| 47 | Ce | 8.116500  | 5.739232  | 1.913077  |
| 48 | Ce | 8.151241  | 5.728700  | 5.707474  |
| 49 | C  | 5.620744  | 6.882056  | 8.628751  |
| 50 | C  | 6.615354  | 5.907074  | 9.048770  |
| 51 | C  | 4.652645  | 7.249911  | 9.491695  |
| 52 | H  | 6.540534  | 5.548125  | 10.102497 |
| 53 | H  | 9.187047  | 3.122230  | 7.195251  |
| 54 | H  | 7.852451  | 2.983032  | 7.997406  |
| 55 | H  | 3.873727  | 7.960410  | 9.205403  |
| 56 | H  | 4.610006  | 6.851940  | 10.511281 |
| 57 | H  | 5.682429  | 7.273475  | 7.604062  |
| 58 | O  | 9.472830  | 3.901516  | 5.813878  |
| 59 | O  | 8.603677  | 2.420762  | 7.696630  |

| ATOM |    | X (Angstroms) | Y (Angstroms) | Z (Angstroms) |
|------|----|---------------|---------------|---------------|
| 1    | O  | 1.352750      | 0.000000      | 1.913077      |
| 2    | O  | 1.412755      | -0.027974     | 5.779285      |
| 3    | O  | 4.058250      | 1.913077      | 0.000000      |
| 4    | O  | 4.044628      | 1.888874      | 3.891681      |
| 5    | O  | 4.058250      | 0.000000      | 1.913077      |
| 6    | O  | 4.005814      | -0.069332     | 5.782664      |
| 7    | O  | 1.352750      | 1.913077      | 0.000000      |
| 8    | O  | 1.331277      | 1.905442      | 3.894165      |
| 9    | Ce | 0.000000      | 0.000000      | 0.000000      |
| 10   | Ce | -0.020997     | -0.014996     | 3.946967      |
| 11   | Ce | 2.705500      | 1.913077      | 1.913077      |
| 12   | Ce | 2.691840      | 1.892527      | 5.644737      |
| 13   | O  | 6.763750      | 0.000000      | 1.913077      |
| 14   | O  | 6.867704      | 0.145496      | 5.740143      |
| 15   | O  | 9.469250      | 1.913077      | 0.000000      |
| 16   | O  | 9.421149      | 1.923553      | 3.847033      |
| 17   | O  | 9.469250      | 0.000000      | 1.913077      |
| 18   | O  | 9.390000      | 0.059104      | 5.745022      |
| 19   | O  | 6.763750      | 1.913077      | 0.000000      |
| 20   | O  | 6.770348      | 1.899557      | 3.810095      |
| 21   | Ce | 5.411000      | 0.000000      | 0.000000      |
| 22   | Ce | 5.411269      | -0.053029     | 3.898446      |
| 23   | Ce | 8.116500      | 1.913077      | 1.913077      |
| 24   | Zr | 8.074873      | 1.908674      | 5.408273      |
| 25   | O  | 1.352750      | 3.826155      | 1.913077      |
| 26   | O  | 1.411366      | 3.843760      | 5.762881      |
| 27   | O  | 4.058250      | 5.739232      | 0.000000      |
| 28   | O  | 3.995255      | 5.720197      | 3.731825      |
| 29   | O  | 4.058250      | 3.826155      | 1.913077      |
| 30   | O  | 3.999444      | 3.844500      | 5.770330      |
| 31   | O  | 1.352750      | 5.739232      | 0.000000      |
| 32   | O  | 1.407298      | 5.740065      | 3.734540      |
| 33   | Ce | 0.000000      | 3.826155      | 0.000000      |
| 34   | Ce | 0.001028      | 3.841102      | 3.912938      |
| 35   | Zr | 2.705500      | 5.739232      | 1.913077      |
| 36   | Ce | 2.696992      | 5.723168      | 5.594850      |
| 37   | O  | 6.763750      | 3.826155      | 1.913077      |
| 38   | O  | 6.851754      | 3.649154      | 5.748873      |
| 39   | O  | 9.469250      | 5.739232      | 0.000000      |
| 40   | O  | 9.472081      | 5.735675      | 3.905052      |
| 41   | O  | 9.469250      | 3.826155      | 1.913077      |
| 42   | O  | 7.673651      | 5.656359      | 8.360183      |
| 43   | O  | 6.763750      | 5.739232      | 0.000000      |
| 44   | O  | 6.750734      | 5.727373      | 3.947039      |
| 45   | Ce | 5.411000      | 3.826155      | 0.000000      |
| 46   | Ce | 5.410104      | 3.808745      | 3.951132      |
| 47   | Ce | 8.116500      | 5.739232      | 1.913077      |
| 48   | Ce | 8.161743      | 5.719363      | 5.732744      |
| 49   | C  | 5.569171      | 6.765285      | 8.622675      |
| 50   | C  | 6.710323      | 5.974213      | 9.062547      |
| 51   | C  | 4.538068      | 6.961412      | 9.468180      |
| 52   | H  | 6.691825      | 5.641063      | 10.128908     |
| 53   | H  | 3.659142      | 7.541166      | 9.173332      |
| 54   | H  | 4.545708      | 6.557415      | 10.486491     |
| 55   | H  | 5.579697      | 7.174858      | 7.602777      |
| 56   | O  | 9.389890      | 3.768859      | 5.736949      |

TS1-4

| X (Angstroms) | Y (Angstroms) | Z (Angstroms) |
|---------------|---------------|---------------|
| 1.352750000   | 0.000000000   | 1.913077397   |
| 1.400309279   | -0.028900297  | 5.762609180   |
| 4.058250000   | 1.913077397   | 0.000000000   |
| 4.072587361   | 1.910120770   | 3.896663398   |
| 4.058250000   | 0.000000000   | 1.913077397   |
| 3.996041420   | -0.018262875  | 5.791213663   |
| 1.352750000   | 1.913077397   | 0.000000000   |
| 1.350449493   | 1.914645764   | 3.887021787   |
| 0.000000000   | 0.000000000   | 0.000000000   |
| 0.009341123   | -0.008827846  | 3.919270797   |
| 2.705500000   | 1.913077397   | 1.913077397   |
| 2.692038119   | 1.917953826   | 5.662706177   |
| 6.763750000   | 0.000000000   | 1.913077397   |
| 6.847940854   | 0.096923016   | 5.785464188   |
| 9.469250000   | 1.913077397   | 0.000000000   |
| 9.447909742   | 1.891489092   | 3.855370991   |
| 9.469250000   | 0.000000000   | 1.913077397   |
| 9.381971229   | 0.129045948   | 5.774891270   |
| 6.763750000   | 1.913077397   | 0.000000000   |
| 6.819194306   | 1.988866379   | 3.943440190   |
| 5.411000000   | 0.000000000   | 0.000000000   |
| 5.427006222   | 0.005371359   | 3.973895432   |
| 8.116500000   | 1.913077397   | 1.913077397   |
| 8.168525020   | 1.854334751   | 5.491852365   |
| 1.352750000   | 3.826154793   | 1.913077397   |
| 1.379523626   | 3.852389571   | 5.776753162   |
| 4.058250000   | 5.739232190   | 0.000000000   |
| 4.013945451   | 5.751085248   | 3.752029912   |
| 4.058250000   | 3.826154793   | 1.913077397   |
| 3.970088306   | 3.867170406   | 5.733653239   |
| 1.352750000   | 5.739232190   | 0.000000000   |
| 1.418361002   | 5.734496915   | 3.744920078   |
| 0.000000000   | 3.826154793   | 0.000000000   |
| -0.015306001  | 3.820303433   | 3.941218836   |
| 2.705500000   | 5.739232190   | 1.913077397   |
| 2.690851082   | 5.742872190   | 5.618446745   |
| 6.763750000   | 3.826154793   | 1.913077397   |
| 6.714361671   | 3.886267468   | 6.250743592   |
| 9.469250000   | 5.739232190   | 0.000000000   |
| 9.492022786   | 5.742474683   | 3.944911909   |
| 9.469250000   | 3.826154793   | 1.913077397   |
| 7.716821216   | 6.007681201   | 8.719118737   |
| 6.763750000   | 5.739232190   | 0.000000000   |
| 6.769428391   | 5.699304666   | 3.977521747   |
| 5.411000000   | 3.826154793   | 0.000000000   |
| 5.371638892   | 3.847487340   | 3.958334017   |
| 8.116500000   | 5.739232190   | 1.913077397   |
| 8.143633140   | 5.772052947   | 5.758421709   |
| 5.487086484   | 6.747469991   | 8.573051043   |
| 6.583412710   | 5.755659436   | 8.343811687   |
| 4.610971361   | 7.026528945   | 9.550381305   |
| 6.513456480   | 4.590925165   | 7.367282715   |
| 3.816307853   | 7.781761934   | 9.369507317   |
| 4.613119699   | 6.577466794   | 10.532281996  |
| 5.392293901   | 7.327779675   | 7.627475576   |
| 9.290718096   | 3.696343527   | 5.731459201   |

CH<sub>2</sub>=CHCO\*

| ATOM |    | X (Angstroms) | Y (Angstroms) | Z (Angstroms) |
|------|----|---------------|---------------|---------------|
| 1    | O  | 1.352750      | 0.000000      | 1.913077      |
| 2    | O  | 1.433660      | -0.030662     | 5.770672      |
| 3    | O  | 4.058250      | 1.913077      | 0.000000      |
| 4    | O  | 4.070769      | 1.908763      | 3.878225      |
| 5    | O  | 4.058250      | 0.000000      | 1.913077      |
| 6    | O  | 4.030048      | -0.041896     | 5.777876      |
| 7    | O  | 1.352750      | 1.913077      | 0.000000      |
| 8    | O  | 1.356625      | 1.920442      | 3.892114      |
| 9    | Ce | 0.000000      | 0.000000      | 0.000000      |
| 10   | Ce | 0.011528      | 0.012057      | 3.914163      |
| 11   | Ce | 2.705500      | 1.913077      | 1.913077      |
| 12   | Ce | 2.705734      | 1.909825      | 5.651645      |
| 13   | O  | 6.763750      | 0.000000      | 1.913077      |
| 14   | O  | 6.872261      | 0.080401      | 5.756885      |
| 15   | O  | 9.469250      | 1.913077      | 0.000000      |
| 16   | O  | 9.451376      | 1.893669      | 3.842999      |
| 17   | O  | 9.469250      | 0.000000      | 1.913077      |
| 18   | O  | 9.405052      | 0.144609      | 5.808738      |
| 19   | O  | 6.763750      | 1.913077      | 0.000000      |
| 20   | O  | 6.816676      | 1.945793      | 3.888132      |
| 21   | Ce | 5.411000      | 0.000000      | 0.000000      |
| 22   | Ce | 5.403989      | -0.036750     | 3.924816      |
| 23   | Ce | 8.116500      | 1.913077      | 1.913077      |
| 24   | Zr | 8.164046      | 1.834597      | 5.456022      |
| 25   | O  | 1.352750      | 3.826155      | 1.913077      |
| 26   | O  | 1.426011      | 3.874330      | 5.769117      |
| 27   | O  | 4.058250      | 5.739232      | 0.000000      |
| 28   | O  | 4.003429      | 5.722288      | 3.729580      |
| 29   | O  | 4.058250      | 3.826155      | 1.913077      |
| 30   | O  | 4.081669      | 3.838291      | 5.803299      |
| 31   | O  | 1.352750      | 5.739232      | 0.000000      |
| 32   | O  | 1.419163      | 5.744314      | 3.739166      |
| 33   | Ce | 0.000000      | 3.826155      | 0.000000      |
| 34   | Ce | -0.003011     | 3.851186      | 3.929939      |
| 35   | Zr | 2.705500      | 5.739232      | 1.913077      |
| 36   | Ce | 2.711025      | 5.738885      | 5.603951      |
| 37   | O  | 6.763750      | 3.826155      | 1.913077      |
| 38   | O  | 6.783100      | 3.526808      | 6.155647      |
| 39   | O  | 9.469250      | 5.739232      | 0.000000      |
| 40   | O  | 9.487453      | 5.777575      | 3.935038      |
| 41   | O  | 9.469250      | 3.826155      | 1.913077      |
| 42   | O  | 7.705170      | 5.976146      | 8.382653      |
| 43   | O  | 6.763750      | 5.739232      | 0.000000      |
| 44   | O  | 6.756539      | 5.656309      | 3.997083      |
| 45   | Ce | 5.411000      | 3.826155      | 0.000000      |
| 46   | Ce | 5.390926      | 3.818656      | 3.846727      |
| 47   | Ce | 8.116500      | 5.739232      | 1.913077      |
| 48   | Ce | 8.181524      | 5.808051      | 5.756287      |
| 49   | C  | 5.575870      | 7.029978      | 8.690526      |
| 50   | C  | 6.831984      | 6.402042      | 9.109089      |
| 51   | C  | 4.576900      | 7.191909      | 9.576605      |
| 52   | H  | 5.858884      | 3.470636      | 6.504180      |
| 53   | H  | 3.619567      | 7.631051      | 9.282175      |
| 54   | H  | 4.690543      | 6.873562      | 10.617696     |
| 55   | H  | 5.501501      | 7.356306      | 7.637056      |

**TS2-1**

| X (Angstroms) | Y (Angstroms) | Z (Angstroms) |
|---------------|---------------|---------------|
| 1.352750000   | 0.000000000   | 1.913077397   |
| 1.407068767   | -0.022473995  | 5.749148112   |
| 4.058250000   | 1.913077397   | 0.000000000   |
| 4.053144831   | 1.907987992   | 3.890161723   |
| 4.058250000   | 0.000000000   | 1.913077397   |
| 3.997972302   | -0.024801988  | 5.774464332   |
| 1.352750000   | 1.913077397   | 0.000000000   |
| 1.336841038   | 1.914229229   | 3.888315724   |
| 0.000000000   | 0.000000000   | 0.000000000   |
| -0.016695294  | 0.007126884   | 3.955385243   |
| 2.705500000   | 1.913077397   | 1.913077397   |
| 2.714793930   | 1.910518559   | 5.655444015   |
| 6.763750000   | 0.000000000   | 1.913077397   |
| 6.824869425   | 0.094042347   | 5.776855472   |
| 9.469250000   | 1.913077397   | 0.000000000   |
| 9.412607321   | 1.985127106   | 3.961728421   |
| 9.469250000   | 0.000000000   | 1.913077397   |
| 9.374444375   | 0.036925045   | 5.730254172   |
| 6.763750000   | 1.913077397   | 0.000000000   |
| 6.765778482   | 1.890304910   | 3.865295422   |
| 5.411000000   | 0.000000000   | 0.000000000   |
| 5.409848594   | 0.001792836   | 3.914765815   |
| 8.116500000   | 1.913077397   | 1.913077397   |
| 8.043275429   | 1.833279378   | 5.540265017   |
| 1.352750000   | 3.826154793   | 1.913077397   |
| 1.433565002   | 3.846645157   | 5.751452757   |
| 4.058250000   | 5.739232190   | 0.000000000   |
| 3.996792901   | 5.745397426   | 3.738517632   |
| 4.058250000   | 3.826154793   | 1.913077397   |
| 4.034074191   | 3.858154089   | 5.767647457   |
| 1.352750000   | 5.739232190   | 0.000000000   |
| 1.397859962   | 5.738834910   | 3.745371470   |
| 0.000000000   | 3.826154793   | 0.000000000   |
| 0.015320230   | 3.819793247   | 3.947777852   |
| 2.705500000   | 5.739232190   | 1.913077397   |
| 2.713446650   | 5.743110203   | 5.592268065   |
| 6.763750000   | 3.826154793   | 1.913077397   |
| 6.951424924   | 3.764075730   | 5.663332734   |
| 9.469250000   | 5.739232190   | 0.000000000   |
| 9.472089682   | 5.678285952   | 3.964044471   |
| 9.469250000   | 3.826154793   | 1.913077397   |
| 9.422945087   | 3.759003858   | 6.087015958   |
| 6.763750000   | 5.739232190   | 0.000000000   |
| 6.756506453   | 5.772279034   | 3.913521519   |
| 5.411000000   | 3.826154793   | 0.000000000   |
| 5.439058287   | 3.829172107   | 3.943138215   |
| 8.116500000   | 5.739232190   | 1.913077397   |
| 8.119262387   | 5.768280137   | 5.717461522   |
| 7.287863905   | 2.021649041   | 8.747965446   |
| 6.035320579   | 2.833240612   | 8.769335825   |
| 8.424421917   | 2.089368692   | 7.968602956   |
| 5.826755787   | 3.214365752   | 9.792695307   |
| 5.170127981   | 2.191166897   | 8.498699113   |
| 6.072379607   | 3.697329927   | 8.097867459   |

9.147595457 1.338604148 8.295781026  
 9.152039790 3.133586472 7.102336244  
 7.237632916 1.209857104 9.488731104

**CH<sub>3</sub>CH=CH\***

| ATOM |    | X (Angstroms) | Y (Angstroms) | Z (Angstroms) |
|------|----|---------------|---------------|---------------|
| 1    | O  | 1.352750      | 0.000000      | 1.913077      |
| 2    | O  | 1.387187      | -0.021425     | 5.744378      |
| 3    | O  | 4.058250      | 1.913077      | 0.000000      |
| 4    | O  | 4.041151      | 1.900845      | 3.883046      |
| 5    | O  | 4.058250      | 0.000000      | 1.913077      |
| 6    | O  | 3.970853      | -0.036606     | 5.768971      |
| 7    | O  | 1.352750      | 1.913077      | 0.000000      |
| 8    | O  | 1.342777      | 1.924748      | 3.871493      |
| 9    | Ce | 0.000000      | 0.000000      | 0.000000      |
| 10   | Ce | -0.024930     | 0.013031      | 3.928991      |
| 11   | Ce | 2.705500      | 1.913077      | 1.913077      |
| 12   | Ce | 2.706905      | 1.900341      | 5.655198      |
| 13   | O  | 6.763750      | 0.000000      | 1.913077      |
| 14   | O  | 6.809044      | 0.053704      | 5.749248      |
| 15   | O  | 9.469250      | 1.913077      | 0.000000      |
| 16   | O  | 9.430157      | 1.961175      | 3.920116      |
| 17   | O  | 9.469250      | 0.000000      | 1.913077      |
| 18   | O  | 9.352974      | 0.025533      | 5.719255      |
| 19   | O  | 6.763750      | 1.913077      | 0.000000      |
| 20   | O  | 6.754641      | 1.895528      | 3.878010      |
| 21   | Ce | 5.411000      | 0.000000      | 0.000000      |
| 22   | Ce | 5.397300      | -0.002547     | 3.911073      |
| 23   | Ce | 8.116500      | 1.913077      | 1.913077      |
| 24   | Zr | 8.055617      | 1.812485      | 5.587674      |
| 25   | O  | 1.352750      | 3.826155      | 1.913077      |
| 26   | O  | 1.369120      | 3.842529      | 5.804500      |
| 27   | O  | 4.058250      | 5.739232      | 0.000000      |
| 28   | O  | 3.983148      | 5.738108      | 3.735739      |
| 29   | O  | 4.058250      | 3.826155      | 1.913077      |
| 30   | O  | 3.994538      | 3.849150      | 5.751054      |
| 31   | O  | 1.352750      | 5.739232      | 0.000000      |
| 32   | O  | 1.393642      | 5.728272      | 3.731941      |
| 33   | Ce | 0.000000      | 3.826155      | 0.000000      |
| 34   | Ce | 0.019756      | 3.817425      | 3.855912      |
| 35   | Zr | 2.705500      | 5.739232      | 1.913077      |
| 36   | Ce | 2.695943      | 5.739102      | 5.591522      |
| 37   | O  | 6.763750      | 3.826155      | 1.913077      |
| 38   | O  | 6.969248      | 3.807897      | 5.646436      |
| 39   | O  | 9.469250      | 5.739232      | 0.000000      |
| 40   | O  | 9.459495      | 5.687219      | 3.926101      |
| 41   | O  | 9.469250      | 3.826155      | 1.913077      |
| 42   | O  | 9.514837      | 3.719508      | 5.994559      |
| 43   | O  | 6.763750      | 5.739232      | 0.000000      |
| 44   | O  | 6.747550      | 5.768145      | 3.881563      |
| 45   | Ce | 5.411000      | 3.826155      | 0.000000      |
| 46   | Ce | 5.429569      | 3.820351      | 3.925577      |
| 47   | Ce | 8.116500      | 5.739232      | 1.913077      |
| 48   | Ce | 8.066234      | 5.817899      | 5.684509      |
| 49   | C  | 7.292896      | 2.153148      | 8.928199      |
| 50   | C  | 5.875564      | 2.624063      | 8.751563      |
| 51   | C  | 8.160619      | 1.854255      | 7.945309      |
| 52   | H  | 5.672776      | 3.517375      | 9.371516      |

|    |   |           |          |          |
|----|---|-----------|----------|----------|
| 53 | H | 5.159663  | 1.845548 | 9.081499 |
| 54 | H | 5.664994  | 2.882501 | 7.704106 |
| 55 | H | 9.169618  | 1.529624 | 8.264563 |
| 56 | H | 10.344618 | 3.671275 | 6.524573 |
| 57 | H | 7.599769  | 2.040415 | 9.987560 |

**TS2-2**

| X (Angstroms) | Y (Angstroms) | Z (Angstroms) |
|---------------|---------------|---------------|
| 1.352750000   | 0.000000000   | 1.913077397   |
| 1.381529212   | -0.020660245  | 5.752842806   |
| 4.058250000   | 1.913077397   | 0.000000000   |
| 4.039865820   | 1.916631535   | 3.876439016   |
| 4.058250000   | 0.000000000   | 1.913077397   |
| 3.974121467   | -0.036199059  | 5.761017759   |
| 1.352750000   | 1.913077397   | 0.000000000   |
| 1.339381361   | 1.918831740   | 3.863801170   |
| 0.000000000   | 0.000000000   | 0.000000000   |
| -0.002736872  | -0.003636365  | 3.922471813   |
| 2.705500000   | 1.913077397   | 1.913077397   |
| 2.700793896   | 1.902012331   | 5.651758773   |
| 6.763750000   | 0.000000000   | 1.913077397   |
| 6.808964850   | 0.088375046   | 5.815452281   |
| 9.469250000   | 1.913077397   | 0.000000000   |
| 9.408871549   | 1.986309858   | 3.994081188   |
| 9.469250000   | 0.000000000   | 1.913077397   |
| 9.369863120   | 0.031936936   | 5.773345642   |
| 6.763750000   | 1.913077397   | 0.000000000   |
| 6.753122623   | 1.915817346   | 3.911931969   |
| 5.411000000   | 0.000000000   | 0.000000000   |
| 5.371003186   | 0.006680327   | 3.894950594   |
| 8.116500000   | 1.913077397   | 1.913077397   |
| 8.096663440   | 1.766061099   | 5.615856220   |
| 1.352750000   | 3.826154793   | 1.913077397   |
| 1.320326608   | 3.852171045   | 5.760755486   |
| 4.058250000   | 5.739232190   | 0.000000000   |
| 3.983361822   | 5.734216947   | 3.726625808   |
| 4.058250000   | 3.826154793   | 1.913077397   |
| 4.027314860   | 3.859999419   | 5.752838752   |
| 1.352750000   | 5.739232190   | 0.000000000   |
| 1.398299932   | 5.731562449   | 3.718218574   |
| 0.000000000   | 3.826154793   | 0.000000000   |
| 0.077235208   | 3.824782203   | 3.802894667   |
| 2.705500000   | 5.739232190   | 1.913077397   |
| 2.687065812   | 5.736973487   | 5.599370791   |
| 6.763750000   | 3.826154793   | 1.913077397   |
| 7.308711403   | 3.769545380   | 5.833964057   |
| 9.469250000   | 5.739232190   | 0.000000000   |
| 9.476654730   | 5.652264935   | 3.998620056   |
| 9.469250000   | 3.826154793   | 1.913077397   |
| 9.513235550   | 2.820444707   | 6.969028234   |
| 6.763750000   | 5.739232190   | 0.000000000   |
| 6.728028674   | 5.751505349   | 3.938395958   |
| 5.411000000   | 3.826154793   | 0.000000000   |
| 5.407276608   | 3.826861846   | 3.891367853   |
| 8.116500000   | 5.739232190   | 1.913077397   |
| 8.058272741   | 5.877086533   | 5.738213347   |
| 7.518484656   | 1.973815414   | 9.327335426   |
| 6.153878935   | 2.470961669   | 8.960481064   |



|              |             |              |
|--------------|-------------|--------------|
| 8.562395166  | 1.623484130 | 8.585572173  |
| 5.675847075  | 3.021779905 | 9.785894959  |
| 5.530084632  | 1.579207612 | 8.745122723  |
| 6.186142848  | 3.089136521 | 8.060168595  |
| 9.455895796  | 1.149285383 | 8.941476442  |
| 10.408036742 | 2.369667474 | 6.935550297  |
| 7.686166481  | 1.781346239 | 10.425398582 |

**CH<sub>3</sub>CH=CHOH\***

| ATOM |    | X (Angstroms) | Y (Angstroms) | Z (Angstroms) |
|------|----|---------------|---------------|---------------|
| 1    | O  | 1.352750      | 0.000000      | 1.913077      |
| 2    | O  | 1.391648      | -0.029854     | 5.768704      |
| 3    | O  | 4.058250      | 1.913077      | 0.000000      |
| 4    | O  | 4.035393      | 1.919051      | 3.865979      |
| 5    | O  | 4.058250      | 0.000000      | 1.913077      |
| 6    | O  | 3.985660      | -0.034604     | 5.759778      |
| 7    | O  | 1.352750      | 1.913077      | 0.000000      |
| 8    | O  | 1.353413      | 1.913010      | 3.862023      |
| 9    | Ce | 0.000000      | 0.000000      | 0.000000      |
| 10   | Ce | 0.027915      | -0.011833     | 3.918537      |
| 11   | Ce | 2.705500      | 1.913077      | 1.913077      |
| 12   | Ce | 2.694436      | 1.903781      | 5.660239      |
| 13   | O  | 6.763750      | 0.000000      | 1.913077      |
| 14   | O  | 6.810219      | 0.104135      | 5.855912      |
| 15   | O  | 9.469250      | 1.913077      | 0.000000      |
| 16   | O  | 9.439493      | 1.975680      | 4.039347      |
| 17   | O  | 9.469250      | 0.000000      | 1.913077      |
| 18   | O  | 9.423575      | 0.035291      | 5.885916      |
| 19   | O  | 6.763750      | 1.913077      | 0.000000      |
| 20   | O  | 6.754988      | 1.953761      | 3.963125      |
| 21   | Ce | 5.411000      | 0.000000      | 0.000000      |
| 22   | Ce | 5.362422      | 0.004217      | 3.898339      |
| 23   | Ce | 8.116500      | 1.913077      | 1.913077      |
| 24   | Zr | 8.061584      | 1.740895      | 5.555243      |
| 25   | O  | 1.352750      | 3.826155      | 1.913077      |
| 26   | O  | 1.309822      | 3.874305      | 5.753675      |
| 27   | O  | 4.058250      | 5.739232      | 0.000000      |
| 28   | O  | 3.979654      | 5.738726      | 3.714770      |
| 29   | O  | 4.058250      | 3.826155      | 1.913077      |
| 30   | O  | 4.065240      | 3.872554      | 5.757054      |
| 31   | O  | 1.352750      | 5.739232      | 0.000000      |
| 32   | O  | 1.414131      | 5.743015      | 3.711204      |
| 33   | Ce | 0.000000      | 3.826155      | 0.000000      |
| 34   | Ce | 0.082000      | 3.835970      | 3.800984      |
| 35   | Zr | 2.705500      | 5.739232      | 1.913077      |
| 36   | Ce | 2.697255      | 5.736477      | 5.608440      |
| 37   | O  | 6.763750      | 3.826155      | 1.913077      |
| 38   | O  | 7.817125      | 3.707462      | 6.098532      |
| 39   | O  | 9.469250      | 5.739232      | 0.000000      |
| 40   | O  | 9.482279      | 5.666510      | 4.045296      |
| 41   | O  | 9.469250      | 3.826155      | 1.913077      |
| 42   | O  | 9.151571      | 1.561218      | 7.777546      |
| 43   | O  | 6.763750      | 5.739232      | 0.000000      |
| 44   | O  | 6.715185      | 5.713746      | 4.003023      |
| 45   | Ce | 5.411000      | 3.826155      | 0.000000      |
| 46   | Ce | 5.343938      | 3.837494      | 3.823266      |
| 47   | Ce | 8.116500      | 5.739232      | 1.913077      |
| 48   | Ce | 8.062098      | 5.887424      | 5.756138      |

|    |   |          |          |           |
|----|---|----------|----------|-----------|
| 49 | C | 7.804842 | 1.675067 | 9.757224  |
| 50 | C | 6.566236 | 2.216560 | 9.101715  |
| 51 | C | 8.942440 | 1.351642 | 9.123069  |
| 52 | H | 5.754368 | 2.343209 | 9.835747  |
| 53 | H | 6.201837 | 1.535559 | 8.312098  |
| 54 | H | 6.743353 | 3.190180 | 8.614665  |
| 55 | H | 9.808606 | 0.939636 | 9.653949  |
| 56 | H | 9.578224 | 0.757993 | 7.274342  |
| 57 | H | 7.799297 | 1.514044 | 10.840054 |

#### IM4

| ATOM |    | X (Angstroms) | Y (Angstroms) | Z (Angstroms) |
|------|----|---------------|---------------|---------------|
| 1    | O  | 1.352750      | 0.000000      | 1.913077      |
| 2    | O  | 1.396785      | 0.002582      | 5.758358      |
| 3    | O  | 4.058250      | 1.913077      | 0.000000      |
| 4    | O  | 4.033691      | 1.911814      | 3.888770      |
| 5    | O  | 4.058250      | 0.000000      | 1.913077      |
| 6    | O  | 3.979362      | -0.042366     | 5.764140      |
| 7    | O  | 1.352750      | 1.913077      | 0.000000      |
| 8    | O  | 1.326374      | 1.914061      | 3.863549      |
| 9    | Ce | 0.000000      | 0.000000      | 0.000000      |
| 10   | Ce | -0.020826     | 0.009043      | 3.944760      |
| 11   | Ce | 2.705500      | 1.913077      | 1.913077      |
| 12   | Ce | 2.690403      | 1.914072      | 5.651726      |
| 13   | O  | 6.763750      | 0.000000      | 1.913077      |
| 14   | O  | 6.812735      | 0.128061      | 5.766790      |
| 15   | O  | 9.469250      | 1.913077      | 0.000000      |
| 16   | O  | 9.377866      | 1.970106      | 3.960834      |
| 17   | O  | 9.469250      | 0.000000      | 1.913077      |
| 18   | O  | 9.401916      | 0.006098      | 5.779056      |
| 19   | O  | 6.763750      | 1.913077      | 0.000000      |
| 20   | O  | 6.742168      | 1.882247      | 3.824680      |
| 21   | Ce | 5.411000      | 0.000000      | 0.000000      |
| 22   | Ce | 5.388087      | -0.012677     | 3.914211      |
| 23   | Ce | 8.116500      | 1.913077      | 1.913077      |
| 24   | Zr | 7.963006      | 1.846366      | 5.508010      |
| 25   | O  | 1.352750      | 3.826155      | 1.913077      |
| 26   | O  | 1.417858      | 3.862060      | 5.704444      |
| 27   | O  | 4.058250      | 5.739232      | 0.000000      |
| 28   | O  | 3.984244      | 5.729992      | 3.734226      |
| 29   | O  | 4.058250      | 3.826155      | 1.913077      |
| 30   | O  | 4.006318      | 3.858228      | 5.770108      |
| 31   | O  | 1.352750      | 5.739232      | 0.000000      |
| 32   | O  | 1.404182      | 5.756829      | 3.728071      |
| 33   | Ce | 0.000000      | 3.826155      | 0.000000      |
| 34   | Ce | 0.047017      | 3.848179      | 3.870144      |
| 35   | Zr | 2.705500      | 5.739232      | 1.913077      |
| 36   | Ce | 2.700537      | 5.744411      | 5.599309      |
| 37   | O  | 6.763750      | 3.826155      | 1.913077      |
| 38   | O  | 6.901639      | 3.658246      | 5.720836      |
| 39   | O  | 9.469250      | 5.739232      | 0.000000      |
| 40   | O  | 9.478024      | 5.708725      | 3.917564      |
| 41   | O  | 9.469250      | 3.826155      | 1.913077      |
| 42   | O  | 8.814582      | 1.374667      | 7.741351      |
| 43   | O  | 6.763750      | 5.739232      | 0.000000      |
| 44   | O  | 6.729916      | 5.742566      | 3.917384      |
| 45   | Ce | 5.411000      | 3.826155      | 0.000000      |
| 46   | Ce | 5.412778      | 3.818276      | 3.932764      |

|    |    |          |          |           |
|----|----|----------|----------|-----------|
| 47 | Ce | 8.116500 | 5.739232 | 1.913077  |
| 48 | Ce | 8.107587 | 5.762132 | 5.722147  |
| 49 | C  | 7.731967 | 1.717041 | 9.858443  |
| 50 | C  | 6.584694 | 2.544542 | 9.370894  |
| 51 | C  | 8.713146 | 1.205648 | 9.098456  |
| 52 | H  | 5.803853 | 2.631246 | 10.143280 |
| 53 | H  | 6.122917 | 2.119055 | 8.467246  |
| 54 | H  | 6.908115 | 3.563015 | 9.107483  |
| 55 | H  | 9.538569 | 0.634299 | 9.530927  |
| 56 | H  | 9.320204 | 0.625498 | 7.242140  |
| 57 | H  | 7.816591 | 1.517510 | 10.931055 |
| 58 | O  | 9.486421 | 3.680406 | 5.937907  |
| 59 | O  | 9.435491 | 4.508825 | 7.080899  |

**CH<sub>3</sub>CH=CHO\***

| ATOM |    | X (Angstroms) | Y (Angstroms) | Z (Angstroms) |
|------|----|---------------|---------------|---------------|
| 1    | O  | 1.352750      | 0.000000      | 1.913077      |
| 2    | O  | 1.369697      | -0.007281     | 5.743486      |
| 3    | O  | 4.058250      | 1.913077      | 0.000000      |
| 4    | O  | 4.022480      | 1.912429      | 3.886384      |
| 5    | O  | 4.058250      | 0.000000      | 1.913077      |
| 6    | O  | 3.954881      | -0.041832     | 5.757901      |
| 7    | O  | 1.352750      | 1.913077      | 0.000000      |
| 8    | O  | 1.325387      | 1.917741      | 3.856309      |
| 9    | Ce | 0.000000      | 0.000000      | 0.000000      |
| 10   | Ce | -0.029330     | 0.012813      | 3.943845      |
| 11   | Ce | 2.705500      | 1.913077      | 1.913077      |
| 12   | Ce | 2.684487      | 1.914294      | 5.649350      |
| 13   | O  | 6.763750      | 0.000000      | 1.913077      |
| 14   | O  | 6.772598      | 0.054198      | 5.785716      |
| 15   | O  | 9.469250      | 1.913077      | 0.000000      |
| 16   | O  | 9.394218      | 1.989965      | 3.963576      |
| 17   | O  | 9.469250      | 0.000000      | 1.913077      |
| 18   | O  | 9.313435      | 0.018192      | 5.707372      |
| 19   | O  | 6.763750      | 1.913077      | 0.000000      |
| 20   | O  | 6.733621      | 1.861735      | 3.862628      |
| 21   | Ce | 5.411000      | 0.000000      | 0.000000      |
| 22   | Ce | 5.383978      | -0.011734     | 3.903868      |
| 23   | Ce | 8.116500      | 1.913077      | 1.913077      |
| 24   | Zr | 8.001649      | 1.748040      | 5.564610      |
| 25   | O  | 1.352750      | 3.826155      | 1.913077      |
| 26   | O  | 1.400593      | 3.857712      | 5.704641      |
| 27   | O  | 4.058250      | 5.739232      | 0.000000      |
| 28   | O  | 3.983695      | 5.732386      | 3.734706      |
| 29   | O  | 4.058250      | 3.826155      | 1.913077      |
| 30   | O  | 3.993293      | 3.856245      | 5.774157      |
| 31   | O  | 1.352750      | 5.739232      | 0.000000      |
| 32   | O  | 1.400715      | 5.755266      | 3.725387      |
| 33   | Ce | 0.000000      | 3.826155      | 0.000000      |
| 34   | Ce | 0.044561      | 3.843339      | 3.863584      |
| 35   | Zr | 2.705500      | 5.739232      | 1.913077      |
| 36   | Ce | 2.695656      | 5.741222      | 5.595192      |
| 37   | O  | 6.763750      | 3.826155      | 1.913077      |
| 38   | O  | 6.914532      | 3.791404      | 5.641408      |
| 39   | O  | 9.469250      | 5.739232      | 0.000000      |
| 40   | O  | 9.470035      | 5.684055      | 3.927742      |
| 41   | O  | 9.469250      | 3.826155      | 1.913077      |
| 42   | O  | 8.162787      | 2.070524      | 7.711191      |

|    |    |          |          |           |
|----|----|----------|----------|-----------|
| 43 | O  | 6.763750 | 5.739232 | 0.000000  |
| 44 | O  | 6.738146 | 5.771884 | 3.880401  |
| 45 | Ce | 5.411000 | 3.826155 | 0.000000  |
| 46 | Ce | 5.417758 | 3.822716 | 3.929844  |
| 47 | Ce | 8.116500 | 5.739232 | 1.913077  |
| 48 | Ce | 8.055763 | 5.771351 | 5.696933  |
| 49 | C  | 6.686609 | 0.987606 | 9.251676  |
| 50 | C  | 5.401691 | 1.508766 | 8.689953  |
| 51 | C  | 7.919721 | 1.285752 | 8.768648  |
| 52 | H  | 4.710219 | 1.810836 | 9.498130  |
| 53 | H  | 4.895161 | 0.738269 | 8.076760  |
| 54 | H  | 5.582564 | 2.379281 | 8.039908  |
| 55 | H  | 8.814498 | 0.876105 | 9.266402  |
| 56 | H  | 8.964419 | 3.469784 | 7.747973  |
| 57 | H  | 6.645605 | 0.316624 | 10.117592 |
| 58 | O  | 9.468056 | 3.700151 | 5.950212  |
| 59 | O  | 9.474119 | 4.246462 | 7.299791  |

**TS2-3**

| X (Angstroms) | Y (Angstroms) | Z (Angstroms) |
|---------------|---------------|---------------|
| 1.352750000   | 0.000000000   | 1.913077397   |
| 1.366966981   | -0.014279938  | 5.744254167   |
| 4.058250000   | 1.913077397   | 0.000000000   |
| 4.036351097   | 1.914478632   | 3.886390846   |
| 4.058250000   | 0.000000000   | 1.913077397   |
| 3.964652439   | -0.041425222  | 5.768549932   |
| 1.352750000   | 1.913077397   | 0.000000000   |
| 1.324781598   | 1.914150336   | 3.861269971   |
| 0.000000000   | 0.000000000   | 0.000000000   |
| -0.029047207  | 0.007930175   | 3.938388326   |
| 2.705500000   | 1.913077397   | 1.913077397   |
| 2.677154964   | 1.914433419   | 5.644251921   |
| 6.763750000   | 0.000000000   | 1.913077397   |
| 6.769257906   | 0.070025847   | 5.817227059   |
| 9.469250000   | 1.913077397   | 0.000000000   |
| 9.379025766   | 1.987828460   | 3.967430902   |
| 9.469250000   | 0.000000000   | 1.913077397   |
| 9.300308654   | 0.036772126   | 5.725240056   |
| 6.763750000   | 1.913077397   | 0.000000000   |
| 6.757613827   | 1.853085543   | 3.877275693   |
| 5.411000000   | 0.000000000   | 0.000000000   |
| 5.358922559   | -0.013705027  | 3.888600098   |
| 8.116500000   | 1.913077397   | 1.913077397   |
| 7.986254053   | 1.763182283   | 5.522225260   |
| 1.352750000   | 3.826154793   | 1.913077397   |
| 1.405118937   | 3.869591677   | 5.706137595   |
| 4.058250000   | 5.739232190   | 0.000000000   |
| 3.983170847   | 5.727839571   | 3.734088988   |
| 4.058250000   | 3.826154793   | 1.913077397   |
| 4.003600033   | 3.852927216   | 5.784188933   |
| 1.352750000   | 5.739232190   | 0.000000000   |
| 1.393933782   | 5.749321045   | 3.718652024   |
| 0.000000000   | 3.826154793   | 0.000000000   |
| 0.059146417   | 3.838107133   | 3.851313353   |
| 2.705500000   | 5.739232190   | 1.913077397   |
| 2.685494425   | 5.738365241   | 5.591238926   |
| 6.763750000   | 3.826154793   | 1.913077397   |
| 6.928585011   | 3.754806998   | 5.674523944   |

|             |             |              |
|-------------|-------------|--------------|
| 9.469250000 | 5.739232190 | 0.000000000  |
| 9.468605617 | 5.683717928 | 3.948821155  |
| 9.469250000 | 3.826154793 | 1.913077397  |
| 8.111457577 | 2.157688615 | 7.955572639  |
| 6.763750000 | 5.739232190 | 0.000000000  |
| 6.733205506 | 5.770428869 | 3.898619572  |
| 5.411000000 | 3.826154793 | 0.000000000  |
| 5.420190669 | 3.820498287 | 3.933028099  |
| 8.116500000 | 5.739232190 | 1.913077397  |
| 8.067183322 | 5.778836594 | 5.687462543  |
| 6.682929559 | 0.980491133 | 9.413116338  |
| 5.366737612 | 1.363011349 | 8.771954819  |
| 7.957904669 | 1.295834314 | 8.907436221  |
| 4.504478269 | 1.268958720 | 9.472403897  |
| 5.208033696 | 0.657157774 | 7.926663119  |
| 5.390832537 | 2.377103328 | 8.323768641  |
| 7.635292798 | 1.629442914 | 10.155894151 |
| 9.049940570 | 3.531569459 | 7.796423537  |
| 6.713354689 | 0.080586046 | 10.027611450 |
| 9.482038845 | 3.641936693 | 5.966737887  |
| 9.541837235 | 4.259767793 | 7.293123579  |

**CH<sub>3</sub>CH<sub>2</sub>CO\***

| ATOM |    | X (Angstroms) | Y (Angstroms) | Z (Angstroms) |
|------|----|---------------|---------------|---------------|
| 1    | O  | 1.352750      | 0.000000      | 1.913077      |
| 2    | O  | 1.366500      | -0.015831     | 5.746987      |
| 3    | O  | 4.058250      | 1.913077      | 0.000000      |
| 4    | O  | 4.036779      | 1.915266      | 3.886605      |
| 5    | O  | 4.058250      | 0.000000      | 1.913077      |
| 6    | O  | 3.960961      | -0.039100     | 5.756742      |
| 7    | O  | 1.352750      | 1.913077      | 0.000000      |
| 8    | O  | 1.326405      | 1.912911      | 3.862503      |
| 9    | Ce | 0.000000      | 0.000000      | 0.000000      |
| 10   | Ce | -0.027980     | 0.012073      | 3.944322      |
| 11   | Ce | 2.705500      | 1.913077      | 1.913077      |
| 12   | Ce | 2.685714      | 1.914127      | 5.649603      |
| 13   | O  | 6.763750      | 0.000000      | 1.913077      |
| 14   | O  | 6.768717      | 0.076306      | 5.822758      |
| 15   | O  | 9.469250      | 1.913077      | 0.000000      |
| 16   | O  | 9.381604      | 1.991481      | 3.965635      |
| 17   | O  | 9.469250      | 0.000000      | 1.913077      |
| 18   | O  | 9.303620      | 0.044646      | 5.745902      |
| 19   | O  | 6.763750      | 1.913077      | 0.000000      |
| 20   | O  | 6.749706      | 1.854334      | 3.869260      |
| 21   | Ce | 5.411000      | 0.000000      | 0.000000      |
| 22   | Ce | 5.360959      | -0.015208     | 3.894602      |
| 23   | Ce | 8.116500      | 1.913077      | 1.913077      |
| 24   | Zr | 7.978318      | 1.775493      | 5.522268      |
| 25   | O  | 1.352750      | 3.826155      | 1.913077      |
| 26   | O  | 1.409385      | 3.871778      | 5.705025      |
| 27   | O  | 4.058250      | 5.739232      | 0.000000      |
| 28   | O  | 3.983850      | 5.726966      | 3.734218      |
| 29   | O  | 4.058250      | 3.826155      | 1.913077      |
| 30   | O  | 4.010260      | 3.854028      | 5.783372      |
| 31   | O  | 1.352750      | 5.739232      | 0.000000      |
| 32   | O  | 1.395383      | 5.752218      | 3.717808      |
| 33   | Ce | 0.000000      | 3.826155      | 0.000000      |
| 34   | Ce | 0.057935      | 3.838164      | 3.853892      |

|    |    |          |          |           |
|----|----|----------|----------|-----------|
| 35 | Zr | 2.705500 | 5.739232 | 1.913077  |
| 36 | Ce | 2.690141 | 5.740194 | 5.593091  |
| 37 | O  | 6.763750 | 3.826155 | 1.913077  |
| 38 | O  | 6.941763 | 3.737483 | 5.695405  |
| 39 | O  | 9.469250 | 5.739232 | 0.000000  |
| 40 | O  | 9.469604 | 5.684005 | 3.961483  |
| 41 | O  | 9.469250 | 3.826155 | 1.913077  |
| 42 | O  | 8.015849 | 2.052520 | 7.962673  |
| 43 | O  | 6.763750 | 5.739232 | 0.000000  |
| 44 | O  | 6.733984 | 5.768375 | 3.910585  |
| 45 | Ce | 5.411000 | 3.826155 | 0.000000  |
| 46 | Ce | 5.418997 | 3.820129 | 3.939397  |
| 47 | Ce | 8.116500 | 5.739232 | 1.913077  |
| 48 | Ce | 8.066620 | 5.795180 | 5.694970  |
| 49 | C  | 6.563760 | 1.153687 | 9.667870  |
| 50 | C  | 5.336557 | 1.193567 | 8.750267  |
| 51 | C  | 7.822545 | 1.822197 | 9.152355  |
| 52 | H  | 4.484556 | 0.707218 | 9.254060  |
| 53 | H  | 5.523542 | 0.681975 | 7.796064  |
| 54 | H  | 5.060618 | 2.237852 | 8.527743  |
| 55 | H  | 6.359790 | 1.592599 | 10.660486 |
| 56 | H  | 9.120649 | 3.600475 | 7.852373  |
| 57 | H  | 6.884350 | 0.113062 | 9.883748  |
| 58 | O  | 9.504173 | 3.596808 | 5.992372  |
| 59 | O  | 9.581094 | 4.281042 | 7.291701  |

**TS3-1**

| X (Angstroms) | Y (Angstroms) | Z (Angstroms) |
|---------------|---------------|---------------|
| 1.352750000   | 0.000000000   | 1.913077397   |
| 1.412881411   | -0.038495800  | 5.760501705   |
| 4.058250000   | 1.913077397   | 0.000000000   |
| 4.048152781   | 1.919248535   | 3.873145660   |
| 4.058250000   | 0.000000000   | 1.913077397   |
| 3.987162435   | -0.030956824  | 5.755719053   |
| 1.352750000   | 1.913077397   | 0.000000000   |
| 1.358940010   | 1.917982174   | 3.880043274   |
| 0.000000000   | 0.000000000   | 0.000000000   |
| 0.021999790   | -0.027836294  | 3.887893296   |
| 2.705500000   | 1.913077397   | 1.913077397   |
| 2.701796447   | 1.908927377   | 5.662007485   |
| 6.763750000   | 0.000000000   | 1.913077397   |
| 6.818552030   | 0.141051487   | 5.817044009   |
| 9.469250000   | 1.913077397   | 0.000000000   |
| 9.480263240   | 1.889431223   | 3.836948632   |
| 9.469250000   | 0.000000000   | 1.913077397   |
| 9.468080174   | 0.125743632   | 5.821701662   |
| 6.763750000   | 1.913077397   | 0.000000000   |
| 6.789713593   | 2.024737106   | 3.976155064   |
| 5.411000000   | 0.000000000   | 0.000000000   |
| 5.435266460   | 0.003064442   | 3.957636187   |
| 8.116500000   | 1.913077397   | 1.913077397   |
| 8.212455047   | 1.712120243   | 5.476971374   |
| 1.352750000   | 3.826154793   | 1.913077397   |
| 1.370186373   | 3.868642951   | 5.750098085   |
| 4.058250000   | 5.739232190   | 0.000000000   |
| 3.982100197   | 5.738207615   | 3.719982492   |
| 4.058250000   | 3.826154793   | 1.913077397   |
| 4.087955203   | 3.858937905   | 5.754226227   |

|              |             |             |
|--------------|-------------|-------------|
| 1.352750000  | 5.739232190 | 0.000000000 |
| 1.431965547  | 5.734103020 | 3.726228229 |
| 0.000000000  | 3.826154793 | 0.000000000 |
| -0.020202125 | 3.841125558 | 3.888871015 |
| 2.705500000  | 5.739232190 | 1.913077397 |
| 2.700825409  | 5.737635981 | 5.614619905 |
| 6.763750000  | 3.826154793 | 1.913077397 |
| 7.660082108  | 4.682552339 | 7.489562403 |
| 9.469250000  | 5.739232190 | 0.000000000 |
| 9.529064391  | 5.726493186 | 3.953941035 |
| 9.469250000  | 3.826154793 | 1.913077397 |
| 8.878795263  | 3.576949255 | 5.813590468 |
| 6.763750000  | 5.739232190 | 0.000000000 |
| 6.712217645  | 5.646738930 | 4.025105535 |
| 5.411000000  | 3.826154793 | 0.000000000 |
| 5.323447095  | 3.848095443 | 3.780330403 |
| 8.116500000  | 5.739232190 | 1.913077397 |
| 8.127540006  | 5.845434177 | 5.918522310 |
| 6.742925723  | 5.669845098 | 9.241614384 |
| 5.344789380  | 5.719374930 | 8.686205303 |
| 7.605984757  | 6.710655050 | 9.239066927 |
| 4.615805622  | 5.743620139 | 9.514923317 |
| 5.146023482  | 4.817223016 | 8.089669205 |
| 5.207975859  | 6.599411808 | 8.052303943 |
| 8.615426744  | 6.619008288 | 9.681498840 |
| 7.410943210  | 7.609475432 | 8.649907653 |
| 6.973570753  | 4.802262850 | 9.873009804 |

**CH<sub>3</sub>CHOCH<sub>2</sub>\***

| ATOM |    | X (Angstroms) | Y (Angstroms) | Z (Angstroms) |
|------|----|---------------|---------------|---------------|
| 1    | O  | 1.352750      | 0.000000      | 1.913077      |
| 2    | O  | 1.406610      | -0.038755     | 5.757290      |
| 3    | O  | 4.058250      | 1.913077      | 0.000000      |
| 4    | O  | 4.046787      | 1.911349      | 3.871261      |
| 5    | O  | 4.058250      | 0.000000      | 1.913077      |
| 6    | O  | 4.000431      | -0.041622     | 5.775586      |
| 7    | O  | 1.352750      | 1.913077      | 0.000000      |
| 8    | O  | 1.363262      | 1.912780      | 3.865219      |
| 9    | Ce | 0.000000      | 0.000000      | 0.000000      |
| 10   | Ce | 0.027547      | -0.007518     | 3.915974      |
| 11   | Ce | 2.705500      | 1.913077      | 1.913077      |
| 12   | Ce | 2.701187      | 1.899971      | 5.656645      |
| 13   | O  | 6.763750      | 0.000000      | 1.913077      |
| 14   | O  | 6.815356      | 0.117034      | 5.883776      |
| 15   | O  | 9.469250      | 1.913077      | 0.000000      |
| 16   | O  | 9.461451      | 1.973388      | 3.960927      |
| 17   | O  | 9.469250      | 0.000000      | 1.913077      |
| 18   | O  | 9.404776      | 0.103743      | 5.867587      |
| 19   | O  | 6.763750      | 1.913077      | 0.000000      |
| 20   | O  | 6.769137      | 1.966220      | 3.959428      |
| 21   | Ce | 5.411000      | 0.000000      | 0.000000      |
| 22   | Ce | 5.379535      | -0.007231     | 3.924979      |
| 23   | Ce | 8.116500      | 1.913077      | 1.913077      |
| 24   | Zr | 8.112777      | 1.723417      | 5.502410      |
| 25   | O  | 1.352750      | 3.826155      | 1.913077      |
| 26   | O  | 1.320410      | 3.870454      | 5.755359      |
| 27   | O  | 4.058250      | 5.739232      | 0.000000      |
| 28   | O  | 3.984289      | 5.737222      | 3.715347      |

|    |    |          |          |           |
|----|----|----------|----------|-----------|
| 29 | O  | 4.058250 | 3.826155 | 1.913077  |
| 30 | O  | 4.081285 | 3.864186 | 5.767480  |
| 31 | O  | 1.352750 | 5.739232 | 0.000000  |
| 32 | O  | 1.421109 | 5.738674 | 3.709129  |
| 33 | Ce | 0.000000 | 3.826155 | 0.000000  |
| 34 | Ce | 0.074206 | 3.840517 | 3.805734  |
| 35 | Zr | 2.705500 | 5.739232 | 1.913077  |
| 36 | Ce | 2.696292 | 5.734294 | 5.602113  |
| 37 | O  | 6.763750 | 3.826155 | 1.913077  |
| 38 | O  | 7.784983 | 6.085662 | 8.501373  |
| 39 | O  | 9.469250 | 5.739232 | 0.000000  |
| 40 | O  | 9.505858 | 5.679575 | 4.059116  |
| 41 | O  | 9.469250 | 3.826155 | 1.913077  |
| 42 | O  | 8.093679 | 3.616611 | 6.229970  |
| 43 | O  | 6.763750 | 5.739232 | 0.000000  |
| 44 | O  | 6.726552 | 5.683792 | 4.069263  |
| 45 | Ce | 5.411000 | 3.826155 | 0.000000  |
| 46 | Ce | 5.335461 | 3.839998 | 3.812152  |
| 47 | Ce | 8.116500 | 5.739232 | 1.913077  |
| 48 | Ce | 8.119696 | 5.912726 | 5.830889  |
| 49 | C  | 6.600402 | 6.023866 | 9.350178  |
| 50 | C  | 5.277243 | 5.837115 | 8.664372  |
| 51 | C  | 7.374461 | 7.270799 | 9.232680  |
| 52 | H  | 4.462521 | 6.025348 | 9.387862  |
| 53 | H  | 5.173227 | 4.805893 | 8.288936  |
| 54 | H  | 5.166110 | 6.536340 | 7.820035  |
| 55 | H  | 8.073960 | 7.569139 | 10.020764 |
| 56 | H  | 6.981701 | 8.070963 | 8.596307  |
| 57 | H  | 6.777476 | 5.403733 | 10.238538 |

**TS3-2**

| X (Angstroms) | Y (Angstroms) | Z (Angstroms) |
|---------------|---------------|---------------|
| 1.352750000   | 0.000000000   | 1.913077397   |
| 1.407391116   | -0.041205323  | 5.749209834   |
| 4.058250000   | 1.913077397   | 0.000000000   |
| 4.047018819   | 1.912121175   | 3.873418410   |
| 4.058250000   | 0.000000000   | 1.913077397   |
| 3.992839723   | -0.034364862  | 5.764908591   |
| 1.352750000   | 1.913077397   | 0.000000000   |
| 1.358483749   | 1.913025102   | 3.867395644   |
| 0.000000000   | 0.000000000   | 0.000000000   |
| 0.010238657   | -0.020954550  | 3.921092337   |
| 2.705500000   | 1.913077397   | 1.913077397   |
| 2.696416220   | 1.900776100   | 5.650849080   |
| 6.763750000   | 0.000000000   | 1.913077397   |
| 6.810780138   | 0.115862375   | 5.867969056   |
| 9.469250000   | 1.913077397   | 0.000000000   |
| 9.458058807   | 1.969957218   | 3.952018912   |
| 9.469250000   | 0.000000000   | 1.913077397   |
| 9.407558868   | 0.101669739   | 5.853121771   |
| 6.763750000   | 1.913077397   | 0.000000000   |
| 6.770170850   | 1.971952531   | 3.956710186   |
| 5.411000000   | 0.000000000   | 0.000000000   |
| 5.391310875   | -0.015114715  | 3.929021513   |
| 8.116500000   | 1.913077397   | 1.913077397   |
| 8.119971532   | 1.718964819   | 5.496121323   |
| 1.352750000   | 3.826154793   | 1.913077397   |
| 1.321668808   | 3.868963171   | 5.748163140   |



|             |             |              |
|-------------|-------------|--------------|
| 4.058250000 | 5.739232190 | 0.000000000  |
| 3.983915182 | 5.739137147 | 3.718448384  |
| 4.058250000 | 3.826154793 | 1.913077397  |
| 4.071605367 | 3.865067682 | 5.756855146  |
| 1.352750000 | 5.739232190 | 0.000000000  |
| 1.422064387 | 5.736376022 | 3.710803425  |
| 0.000000000 | 3.826154793 | 0.000000000  |
| 0.057905958 | 3.850785549 | 3.811657014  |
| 2.705500000 | 5.739232190 | 1.913077397  |
| 2.695558486 | 5.734247992 | 5.603124817  |
| 6.763750000 | 3.826154793 | 1.913077397  |
| 7.634917714 | 5.818280664 | 8.527248642  |
| 9.469250000 | 5.739232190 | 0.000000000  |
| 9.503166383 | 5.675718546 | 4.068366415  |
| 9.469250000 | 3.826154793 | 1.913077397  |
| 8.122618167 | 3.621601293 | 6.188299867  |
| 6.763750000 | 5.739232190 | 0.000000000  |
| 6.721094608 | 5.677957162 | 4.089307738  |
| 5.411000000 | 3.826154793 | 0.000000000  |
| 5.343670758 | 3.849376256 | 3.816719148  |
| 8.116500000 | 5.739232190 | 1.913077397  |
| 8.100937545 | 5.908995944 | 5.971802485  |
| 6.678429452 | 6.489164131 | 9.133004683  |
| 5.270362939 | 6.183532310 | 8.657889169  |
| 7.086234912 | 7.793045155 | 9.571825820  |
| 4.485327095 | 6.378273794 | 9.395487660  |
| 5.201942334 | 5.140971096 | 8.327406948  |
| 5.128908236 | 6.814882028 | 7.773571807  |
| 8.083202127 | 7.807762407 | 10.035795420 |
| 6.600476063 | 8.723790270 | 9.306959752  |
| 6.570485706 | 6.367588846 | 10.438596340 |

**CH<sub>3</sub>COCH<sub>3</sub>\***

| ATOM |    | X (Angstroms) | Y (Angstroms) | Z (Angstroms) |
|------|----|---------------|---------------|---------------|
| 1    | O  | 1.352750      | 0.000000      | 1.913077      |
| 2    | O  | 1.403045      | -0.042746     | 5.750412      |
| 3    | O  | 4.058250      | 1.913077      | 0.000000      |
| 4    | O  | 4.045434      | 1.909112      | 3.876765      |
| 5    | O  | 4.058250      | 0.000000      | 1.913077      |
| 6    | O  | 4.000242      | -0.036971     | 5.796662      |
| 7    | O  | 1.352750      | 1.913077      | 0.000000      |
| 8    | O  | 1.359497      | 1.914484      | 3.867436      |
| 9    | Ce | 0.000000      | 0.000000      | 0.000000      |
| 10   | Ce | 0.026679      | -0.012159     | 3.916047      |
| 11   | Ce | 2.705500      | 1.913077      | 1.913077      |
| 12   | Ce | 2.692137      | 1.904127      | 5.655865      |
| 13   | O  | 6.763750      | 0.000000      | 1.913077      |
| 14   | O  | 6.815221      | 0.115978      | 5.874709      |
| 15   | O  | 9.469250      | 1.913077      | 0.000000      |
| 16   | O  | 9.459163      | 1.965506      | 3.954977      |
| 17   | O  | 9.469250      | 0.000000      | 1.913077      |
| 18   | O  | 9.408074      | 0.097949      | 5.860235      |
| 19   | O  | 6.763750      | 1.913077      | 0.000000      |
| 20   | O  | 6.771153      | 1.973527      | 3.962343      |
| 21   | Ce | 5.411000      | 0.000000      | 0.000000      |
| 22   | Ce | 5.384914      | -0.005360     | 3.926525      |
| 23   | Ce | 8.116500      | 1.913077      | 1.913077      |
| 24   | Zr | 8.120773      | 1.718603      | 5.503367      |

|    |    |          |          |           |
|----|----|----------|----------|-----------|
| 25 | O  | 1.352750 | 3.826155 | 1.913077  |
| 26 | O  | 1.316383 | 3.868489 | 5.756171  |
| 27 | O  | 4.058250 | 5.739232 | 0.000000  |
| 28 | O  | 3.985389 | 5.743347 | 3.718606  |
| 29 | O  | 4.058250 | 3.826155 | 1.913077  |
| 30 | O  | 4.080706 | 3.872159 | 5.773055  |
| 31 | O  | 1.352750 | 5.739232 | 0.000000  |
| 32 | O  | 1.420051 | 5.735815 | 3.709762  |
| 33 | Ce | 0.000000 | 3.826155 | 0.000000  |
| 34 | Ce | 0.068153 | 3.840402 | 3.807838  |
| 35 | Zr | 2.705500 | 5.739232 | 1.913077  |
| 36 | Ce | 2.691043 | 5.731029 | 5.601070  |
| 37 | O  | 6.763750 | 3.826155 | 1.913077  |
| 38 | O  | 7.607789 | 6.189855 | 8.429943  |
| 39 | O  | 9.469250 | 5.739232 | 0.000000  |
| 40 | O  | 9.501093 | 5.677666 | 4.054388  |
| 41 | O  | 9.469250 | 3.826155 | 1.913077  |
| 42 | O  | 8.131419 | 3.616431 | 6.220318  |
| 43 | O  | 6.763750 | 5.739232 | 0.000000  |
| 44 | O  | 6.727303 | 5.680076 | 4.077934  |
| 45 | Ce | 5.411000 | 3.826155 | 0.000000  |
| 46 | Ce | 5.335195 | 3.842857 | 3.814518  |
| 47 | Ce | 8.116500 | 5.739232 | 1.913077  |
| 48 | Ce | 8.124322 | 5.903787 | 5.842072  |
| 49 | C  | 6.649654 | 6.763228 | 8.959987  |
| 50 | C  | 5.241534 | 6.451915 | 8.558754  |
| 51 | C  | 6.879333 | 7.842061 | 9.983521  |
| 52 | H  | 4.515843 | 6.681661 | 9.355164  |
| 53 | H  | 5.158674 | 5.400671 | 8.242819  |
| 54 | H  | 5.005047 | 7.082511 | 7.671746  |
| 55 | H  | 7.953421 | 8.000495 | 10.145261 |
| 56 | H  | 6.417412 | 8.780705 | 9.629951  |
| 57 | H  | 6.386127 | 7.584128 | 10.935189 |

#### IM5

| ATOM |    | X (Angstroms) | Y (Angstroms) | Z (Angstroms) |
|------|----|---------------|---------------|---------------|
| 1    | O  | 1.352750      | 0.000000      | 1.913077      |
| 2    | O  | 1.424963      | -0.023820     | 5.759651      |
| 3    | O  | 4.058250      | 1.913077      | 0.000000      |
| 4    | O  | 4.060058      | 1.910477      | 3.900501      |
| 5    | O  | 4.058250      | 0.000000      | 1.913077      |
| 6    | O  | 4.011475      | -0.049962     | 5.782023      |
| 7    | O  | 1.352750      | 1.913077      | 0.000000      |
| 8    | O  | 1.373350      | 1.917599      | 3.871597      |
| 9    | Ce | 0.000000      | 0.000000      | 0.000000      |
| 10   | Ce | 0.007788      | 0.004411      | 3.886200      |
| 11   | Ce | 2.705500      | 1.913077      | 1.913077      |
| 12   | Ce | 2.665099      | 1.926703      | 5.679022      |
| 13   | O  | 6.763750      | 0.000000      | 1.913077      |
| 14   | O  | 6.905584      | 0.005818      | 5.726525      |
| 15   | O  | 9.469250      | 1.913077      | 0.000000      |
| 16   | O  | 9.481648      | 1.877004      | 3.798713      |
| 17   | O  | 9.469250      | 0.000000      | 1.913077      |
| 18   | O  | 9.459829      | 0.131606      | 5.794039      |
| 19   | O  | 6.763750      | 1.913077      | 0.000000      |
| 20   | O  | 6.819420      | 1.972600      | 3.947341      |
| 21   | Ce | 5.411000      | 0.000000      | 0.000000      |
| 22   | Ce | 5.412729      | -0.024240     | 3.973881      |

|    |    |          |          |           |
|----|----|----------|----------|-----------|
| 23 | Ce | 8.116500 | 1.913077 | 1.913077  |
| 24 | Zr | 8.213751 | 1.768850 | 5.490452  |
| 25 | O  | 1.352750 | 3.826155 | 1.913077  |
| 26 | O  | 1.354244 | 3.861517 | 5.743948  |
| 27 | O  | 4.058250 | 5.739232 | 0.000000  |
| 28 | O  | 4.001623 | 5.740184 | 3.736975  |
| 29 | O  | 4.058250 | 3.826155 | 1.913077  |
| 30 | O  | 3.945691 | 3.854714 | 5.754312  |
| 31 | O  | 1.352750 | 5.739232 | 0.000000  |
| 32 | O  | 1.426978 | 5.740645 | 3.710344  |
| 33 | Ce | 0.000000 | 3.826155 | 0.000000  |
| 34 | Ce | 0.021000 | 3.839948 | 3.834232  |
| 35 | Zr | 2.705500 | 5.739232 | 1.913077  |
| 36 | Ce | 2.678555 | 5.743979 | 5.596297  |
| 37 | O  | 6.763750 | 3.826155 | 1.913077  |
| 38 | O  | 8.021540 | 5.924508 | 8.348948  |
| 39 | O  | 9.469250 | 5.739232 | 0.000000  |
| 40 | O  | 9.512485 | 5.777064 | 3.878477  |
| 41 | O  | 9.469250 | 3.826155 | 1.913077  |
| 42 | O  | 9.225542 | 3.730720 | 5.616625  |
| 43 | O  | 6.763750 | 5.739232 | 0.000000  |
| 44 | O  | 6.753357 | 5.675060 | 3.944909  |
| 45 | Ce | 5.411000 | 3.826155 | 0.000000  |
| 46 | Ce | 5.369737 | 3.823777 | 3.885775  |
| 47 | Ce | 8.116500 | 5.739232 | 1.913077  |
| 48 | Ce | 8.202094 | 5.781818 | 5.738147  |
| 49 | C  | 7.024098 | 5.976529 | 9.077419  |
| 50 | C  | 5.637725 | 6.002157 | 8.509861  |
| 51 | C  | 7.187846 | 6.007955 | 10.572615 |
| 52 | H  | 4.864644 | 6.095830 | 9.287645  |
| 53 | H  | 5.485609 | 5.076139 | 7.927245  |
| 54 | H  | 5.552309 | 6.832240 | 7.784135  |
| 55 | H  | 8.249727 | 5.996570 | 10.852697 |
| 56 | H  | 6.696389 | 6.905393 | 10.985000 |
| 57 | H  | 6.674967 | 5.137601 | 11.014505 |
| 58 | O  | 6.619344 | 4.034000 | 6.102409  |
| 59 | O  | 6.892493 | 2.854621 | 6.834315  |

### TS3-3

| X (Angstroms) | Y (Angstroms) | Z (Angstroms) |
|---------------|---------------|---------------|
| 1.352750000   | 0.000000000   | 1.913077397   |
| 1.457652601   | 0.013688653   | 5.828726828   |
| 4.058250000   | 1.913077397   | 0.000000000   |
| 4.077694305   | 2.063839808   | 3.999124119   |
| 4.058250000   | 0.000000000   | 1.913077397   |
| 4.041057990   | 0.034335725   | 5.731430665   |
| 1.352750000   | 1.913077397   | 0.000000000   |
| 1.384461230   | 1.888098073   | 3.901431162   |
| 0.000000000   | 0.000000000   | 0.000000000   |
| 0.027719385   | -0.016124096  | 3.900717495   |
| 2.705500000   | 1.913077397   | 1.913077397   |
| 2.679386428   | 1.856319295   | 5.720211474   |
| 6.763750000   | 0.000000000   | 1.913077397   |
| 6.903025800   | 0.055194929   | 5.680269281   |
| 9.469250000   | 1.913077397   | 0.000000000   |
| 9.490328947   | 1.844844205   | 3.816251663   |
| 9.469250000   | 0.000000000   | 1.913077397   |
| 9.474377856   | 0.128481064   | 5.847479161   |

|              |             |              |
|--------------|-------------|--------------|
| 6.763750000  | 1.913077397 | 0.000000000  |
| 6.841529750  | 2.023525485 | 3.944009990  |
| 5.411000000  | 0.000000000 | 0.000000000  |
| 5.439934435  | 0.022976311 | 3.953346233  |
| 8.116500000  | 1.913077397 | 1.913077397  |
| 8.224106039  | 1.754083376 | 5.516046671  |
| 1.352750000  | 3.826154793 | 1.913077397  |
| 1.543743673  | 3.784871810 | 5.771549651  |
| 4.058250000  | 5.739232190 | 0.000000000  |
| 4.017318351  | 5.710734972 | 3.748451129  |
| 4.058250000  | 3.826154793 | 1.913077397  |
| 4.260984528  | 4.460759424 | 6.375331498  |
| 1.352750000  | 5.739232190 | 0.000000000  |
| 1.432014423  | 5.735004331 | 3.747556336  |
| 0.000000000  | 3.826154793 | 0.000000000  |
| -0.011122192 | 3.816181693 | 3.940492154  |
| 2.705500000  | 5.739232190 | 1.913077397  |
| 2.715475971  | 5.804930811 | 5.666613643  |
| 6.763750000  | 3.826154793 | 1.913077397  |
| 7.935350100  | 5.886135702 | 8.191008226  |
| 9.469250000  | 5.739232190 | 0.000000000  |
| 9.533979763  | 5.769390487 | 3.917676786  |
| 9.469250000  | 3.826154793 | 1.913077397  |
| 9.249475643  | 3.689810876 | 5.626034803  |
| 6.763750000  | 5.739232190 | 0.000000000  |
| 6.767785872  | 5.693854621 | 3.937909516  |
| 5.411000000  | 3.826154793 | 0.000000000  |
| 5.443849219  | 3.901296716 | 3.884671128  |
| 8.116500000  | 5.739232190 | 1.913077397  |
| 8.210009303  | 5.830606901 | 5.802219811  |
| 6.877056466  | 5.660653110 | 8.857518148  |
| 5.559741840  | 5.824377339 | 8.318533198  |
| 7.160595178  | 5.280463517 | 10.328805614 |
| 4.792884029  | 5.893205408 | 9.082406957  |
| 4.926635648  | 4.965629087 | 7.247084786  |
| 5.530559405  | 6.655944616 | 7.599808932  |
| 8.223636791  | 5.488055233 | 10.526589041 |
| 6.546265724  | 5.853737865 | 11.057512833 |
| 6.960980269  | 4.208859189 | 10.482372295 |
| 6.734217361  | 4.036015319 | 6.187154428  |
| 6.899499071  | 2.852930030 | 6.878429957  |

**CH<sub>3</sub>COCH<sub>2</sub>\***

| ATOM |    | X (Angstroms) | Y (Angstroms) | Z (Angstroms) |
|------|----|---------------|---------------|---------------|
| 1    | O  | 1.352750      | 0.000000      | 1.913077      |
| 2    | O  | 1.405353      | -0.022452     | 5.807633      |
| 3    | O  | 4.058250      | 1.913077      | 0.000000      |
| 4    | O  | 4.067014      | 1.975765      | 3.925620      |
| 5    | O  | 4.058250      | 0.000000      | 1.913077      |
| 6    | O  | 3.982219      | -0.012064     | 5.755312      |
| 7    | O  | 1.352750      | 1.913077      | 0.000000      |
| 8    | O  | 1.373518      | 1.899267      | 3.887772      |
| 9    | Ce | 0.000000      | 0.000000      | 0.000000      |
| 10   | Ce | 0.007226      | 0.002389      | 3.871800      |
| 11   | Ce | 2.705500      | 1.913077      | 1.913077      |
| 12   | Ce | 2.660542      | 1.867791      | 5.677840      |
| 13   | O  | 6.763750      | 0.000000      | 1.913077      |
| 14   | O  | 6.896160      | 0.037254      | 5.643033      |

|    |    |           |           |           |
|----|----|-----------|-----------|-----------|
| 15 | O  | 9.469250  | 1.913077  | 0.000000  |
| 16 | O  | 9.489085  | 1.879315  | 3.784067  |
| 17 | O  | 9.469250  | 0.000000  | 1.913077  |
| 18 | O  | 9.462057  | 0.148821  | 5.789780  |
| 19 | O  | 6.763750  | 1.913077  | 0.000000  |
| 20 | O  | 6.826951  | 1.992013  | 3.901856  |
| 21 | Ce | 5.411000  | 0.000000  | 0.000000  |
| 22 | Ce | 5.447259  | -0.013097 | 3.940548  |
| 23 | Ce | 8.116500  | 1.913077  | 1.913077  |
| 24 | Zr | 8.223020  | 1.771194  | 5.483043  |
| 25 | O  | 1.352750  | 3.826155  | 1.913077  |
| 26 | O  | 1.482653  | 3.885715  | 5.692365  |
| 27 | O  | 4.058250  | 5.739232  | 0.000000  |
| 28 | O  | 4.004935  | 5.706631  | 3.776964  |
| 29 | O  | 4.058250  | 3.826155  | 1.913077  |
| 30 | O  | 4.049196  | 3.867559  | 6.100866  |
| 31 | O  | 1.352750  | 5.739232  | 0.000000  |
| 32 | O  | 1.433224  | 5.776698  | 3.725541  |
| 33 | Ce | 0.000000  | 3.826155  | 0.000000  |
| 34 | Ce | -0.014059 | 3.863209  | 3.884298  |
| 35 | Zr | 2.705500  | 5.739232  | 1.913077  |
| 36 | Ce | 2.670177  | 5.815351  | 5.620787  |
| 37 | O  | 6.763750  | 3.826155  | 1.913077  |
| 38 | O  | 7.976423  | 5.861857  | 8.088814  |
| 39 | O  | 9.469250  | 5.739232  | 0.000000  |
| 40 | O  | 9.519382  | 5.785624  | 3.887355  |
| 41 | O  | 9.469250  | 3.826155  | 1.913077  |
| 42 | O  | 9.289151  | 3.713131  | 5.613166  |
| 43 | O  | 6.763750  | 5.739232  | 0.000000  |
| 44 | O  | 6.744391  | 5.667831  | 3.917597  |
| 45 | Ce | 5.411000  | 3.826155  | 0.000000  |
| 46 | Ce | 5.423021  | 3.834429  | 3.811133  |
| 47 | Ce | 8.116500  | 5.739232  | 1.913077  |
| 48 | Ce | 8.210328  | 5.805739  | 5.817371  |
| 49 | C  | 6.965411  | 5.680836  | 8.911108  |
| 50 | C  | 5.795055  | 6.393282  | 8.800896  |
| 51 | C  | 7.173770  | 4.626299  | 9.965766  |
| 52 | H  | 4.978313  | 6.234449  | 9.510176  |
| 53 | H  | 4.953447  | 3.922990  | 6.513326  |
| 54 | H  | 5.683349  | 7.151738  | 8.021885  |
| 55 | H  | 8.115754  | 4.815618  | 10.505810 |
| 56 | H  | 6.344618  | 4.589664  | 10.687640 |
| 57 | H  | 7.268002  | 3.644433  | 9.472213  |
| 58 | O  | 6.630061  | 3.990935  | 6.031906  |
| 59 | O  | 6.901235  | 2.818199  | 6.819728  |

**TS3-4**

| X (Angstroms) | Y (Angstroms) | Z (Angstroms) |
|---------------|---------------|---------------|
| 1.352750000   | 0.000000000   | 1.913077397   |
| 1.374590654   | -0.061488728  | 5.811987738   |
| 4.058250000   | 1.913077397   | 0.000000000   |
| 4.058996033   | 1.940939646   | 3.922283021   |
| 4.058250000   | 0.000000000   | 1.913077397   |
| 3.947778723   | -0.060542608  | 5.736126250   |
| 1.352750000   | 1.913077397   | 0.000000000   |
| 1.352884108   | 1.874048546   | 3.897936088   |
| 0.000000000   | 0.000000000   | 0.000000000   |
| -0.024936079  | -0.025198208  | 3.895926897   |

|              |              |              |
|--------------|--------------|--------------|
| 2.705500000  | 1.913077397  | 1.913077397  |
| 2.653206892  | 1.806023045  | 5.677047793  |
| 6.763750000  | 0.000000000  | 1.913077397  |
| 6.828835046  | 0.103588896  | 5.697517488  |
| 9.469250000  | 1.913077397  | 0.000000000  |
| 9.437480951  | 1.886622165  | 3.837602662  |
| 9.469250000  | 0.000000000  | 1.913077397  |
| 9.355294586  | 0.196345622  | 5.828871037  |
| 6.763750000  | 1.913077397  | 0.000000000  |
| 6.803451724  | 1.942281603  | 3.841289137  |
| 5.411000000  | 0.000000000  | 0.000000000  |
| 5.425317138  | -0.037791577 | 3.927693354  |
| 8.116500000  | 1.913077397  | 1.913077397  |
| 8.150683659  | 1.870187529  | 5.455446146  |
| 1.352750000  | 3.826154793  | 1.913077397  |
| 1.401387794  | 3.842742245  | 5.715290211  |
| 4.058250000  | 5.739232190  | 0.000000000  |
| 3.989230040  | 5.674115620  | 3.786308744  |
| 4.058250000  | 3.826154793  | 1.913077397  |
| 3.933106659  | 3.779713527  | 6.023552196  |
| 1.352750000  | 5.739232190  | 0.000000000  |
| 1.412194644  | 5.745306491  | 3.735616095  |
| 0.000000000  | 3.826154793  | 0.000000000  |
| -0.057735972 | 3.833285819  | 3.955696274  |
| 2.705500000  | 5.739232190  | 1.913077397  |
| 2.619254141  | 5.762069332  | 5.630825554  |
| 6.763750000  | 3.826154793  | 1.913077397  |
| 8.018172983  | 6.004837453  | 8.395806237  |
| 9.469250000  | 5.739232190  | 0.000000000  |
| 9.513437091  | 5.794637854  | 3.985412002  |
| 9.469250000  | 3.826154793  | 1.913077397  |
| 9.202544267  | 3.723652860  | 5.699381224  |
| 6.763750000  | 5.739232190  | 0.000000000  |
| 6.775915721  | 5.692994032  | 3.960754212  |
| 5.411000000  | 3.826154793  | 0.000000000  |
| 5.436727154  | 3.815683703  | 3.900454539  |
| 8.116500000  | 5.739232190  | 1.913077397  |
| 8.083940565  | 5.875930819  | 5.918646651  |
| 6.843649510  | 5.703761707  | 8.896896892  |
| 5.676625426  | 6.359646802  | 8.474674734  |
| 6.731589025  | 4.572114282  | 9.897688916  |
| 4.711797510  | 6.150589917  | 8.947764481  |
| 4.801271024  | 3.902957410  | 6.522542253  |
| 5.781199753  | 7.277348612  | 7.881674318  |
| 7.440773709  | 4.663711941  | 10.742420416 |
| 5.718307207  | 4.495002502  | 10.312290323 |
| 6.946439259  | 3.630841543  | 9.382065195  |
| 6.162483069  | 4.725574572  | 7.059997653  |
| 6.504888266  | 3.402241937  | 5.909411637  |

**CH<sub>3</sub>COCOH<sub>2</sub>\***

| ATOM |   | X (Angstroms) | Y (Angstroms) | Z (Angstroms) |
|------|---|---------------|---------------|---------------|
| 1    | O | 1.352750      | 0.000000      | 1.913077      |
| 2    | O | 1.352788      | -0.003921     | 5.806584      |
| 3    | O | 4.058250      | 1.913077      | 0.000000      |
| 4    | O | 4.034243      | 1.970801      | 3.868522      |
| 5    | O | 4.058250      | 0.000000      | 1.913077      |
| 6    | O | 3.952296      | 0.057947      | 5.682377      |

|    |    |           |           |           |
|----|----|-----------|-----------|-----------|
| 7  | O  | 1.352750  | 1.913077  | 0.000000  |
| 8  | O  | 1.316181  | 1.889156  | 3.876774  |
| 9  | Ce | 0.000000  | 0.000000  | 0.000000  |
| 10 | Ce | -0.031204 | -0.022412 | 3.944655  |
| 11 | Ce | 2.705500  | 1.913077  | 1.913077  |
| 12 | Ce | 2.638764  | 1.843534  | 5.657658  |
| 13 | O  | 6.763750  | 0.000000  | 1.913077  |
| 14 | O  | 6.785127  | 0.154162  | 5.710962  |
| 15 | O  | 9.469250  | 1.913077  | 0.000000  |
| 16 | O  | 9.414132  | 1.913745  | 3.860679  |
| 17 | O  | 9.469250  | 0.000000  | 1.913077  |
| 18 | O  | 9.308856  | 0.072779  | 5.769336  |
| 19 | O  | 6.763750  | 1.913077  | 0.000000  |
| 20 | O  | 6.784369  | 1.930891  | 3.799109  |
| 21 | Ce | 5.411000  | 0.000000  | 0.000000  |
| 22 | Ce | 5.393441  | 0.008348  | 3.913258  |
| 23 | Ce | 8.116500  | 1.913077  | 1.913077  |
| 24 | Zr | 8.068015  | 1.920746  | 5.419727  |
| 25 | O  | 1.352750  | 3.826155  | 1.913077  |
| 26 | O  | 1.490148  | 3.814793  | 5.729916  |
| 27 | O  | 4.058250  | 5.739232  | 0.000000  |
| 28 | O  | 3.995268  | 5.694688  | 3.796768  |
| 29 | O  | 4.058250  | 3.826155  | 1.913077  |
| 30 | O  | 4.152434  | 3.743135  | 6.000590  |
| 31 | O  | 1.352750  | 5.739232  | 0.000000  |
| 32 | O  | 1.385485  | 5.755456  | 3.758597  |
| 33 | Ce | 0.000000  | 3.826155  | 0.000000  |
| 34 | Ce | 0.002732  | 3.843840  | 3.953200  |
| 35 | Zr | 2.705500  | 5.739232  | 1.913077  |
| 36 | Ce | 2.696541  | 5.796334  | 5.774408  |
| 37 | O  | 6.763750  | 3.826155  | 1.913077  |
| 38 | O  | 6.878129  | 5.541368  | 8.128799  |
| 39 | O  | 9.469250  | 5.739232  | 0.000000  |
| 40 | O  | 9.452587  | 5.740955  | 3.921462  |
| 41 | O  | 9.469250  | 3.826155  | 1.913077  |
| 42 | O  | 9.322805  | 3.751980  | 5.746276  |
| 43 | O  | 6.763750  | 5.739232  | 0.000000  |
| 44 | O  | 6.746224  | 5.725607  | 3.932015  |
| 45 | Ce | 5.411000  | 3.826155  | 0.000000  |
| 46 | Ce | 5.419287  | 3.833049  | 3.843504  |
| 47 | Ce | 8.116500  | 5.739232  | 1.913077  |
| 48 | Ce | 8.084790  | 5.758241  | 5.735605  |
| 49 | C  | 5.732949  | 5.427576  | 8.582896  |
| 50 | C  | 4.663935  | 6.498439  | 8.356176  |
| 51 | C  | 5.344591  | 4.227001  | 9.398963  |
| 52 | H  | 4.509865  | 6.985952  | 9.352121  |
| 53 | H  | 5.079722  | 3.672283  | 6.368580  |
| 54 | H  | 5.090518  | 7.254719  | 7.670555  |
| 55 | H  | 5.488271  | 4.475420  | 10.467086 |
| 56 | H  | 4.280615  | 3.997019  | 9.249141  |
| 57 | H  | 5.984753  | 3.367876  | 9.157129  |
| 58 | O  | 3.468141  | 5.958012  | 7.882625  |
| 59 | O  | 6.753148  | 3.638429  | 5.776335  |

**TS3-5**

| X (Angstroms) | Y (Angstroms) | Z (Angstroms) |
|---------------|---------------|---------------|
| 1.352750000   | 0.000000000   | 1.913077397   |
| 1.368951271   | -0.021769490  | 5.813201839   |

|              |              |              |
|--------------|--------------|--------------|
| 4.058250000  | 1.913077397  | 0.000000000  |
| 4.043295298  | 1.970362815  | 3.899116410  |
| 4.058250000  | 0.000000000  | 1.913077397  |
| 3.954060949  | 0.025181788  | 5.709738738  |
| 1.352750000  | 1.913077397  | 0.000000000  |
| 1.323200710  | 1.890474475  | 3.888963439  |
| 0.000000000  | 0.000000000  | 0.000000000  |
| -0.043128582 | -0.009208882 | 3.933284915  |
| 2.705500000  | 1.913077397  | 1.913077397  |
| 2.648084811  | 1.851117116  | 5.660196761  |
| 6.763750000  | 0.000000000  | 1.913077397  |
| 6.789657219  | 0.150131173  | 5.738106420  |
| 9.469250000  | 1.913077397  | 0.000000000  |
| 9.422527661  | 1.916858696  | 3.829790764  |
| 9.469250000  | 0.000000000  | 1.913077397  |
| 9.332790524  | 0.128702885  | 5.740686858  |
| 6.763750000  | 1.913077397  | 0.000000000  |
| 6.791685467  | 1.925492604  | 3.808823640  |
| 5.411000000  | 0.000000000  | 0.000000000  |
| 5.414053825  | 0.004434018  | 3.926260191  |
| 8.116500000  | 1.913077397  | 1.913077397  |
| 8.094314196  | 1.915233182  | 5.415654129  |
| 1.352750000  | 3.826154793  | 1.913077397  |
| 1.507454471  | 3.841237687  | 5.726004235  |
| 4.058250000  | 5.739232190  | 0.000000000  |
| 3.993267390  | 5.692778704  | 3.797956517  |
| 4.058250000  | 3.826154793  | 1.913077397  |
| 4.144598225  | 3.786330776  | 6.055659028  |
| 1.352750000  | 5.739232190  | 0.000000000  |
| 1.396066454  | 5.760524893  | 3.757439026  |
| 0.000000000  | 3.826154793  | 0.000000000  |
| -0.011105689 | 3.838938913  | 3.939728830  |
| 2.705500000  | 5.739232190  | 1.913077397  |
| 2.678774802  | 5.795543040  | 5.695339402  |
| 6.763750000  | 3.826154793  | 1.913077397  |
| 8.267058654  | 5.553308526  | 8.317647161  |
| 9.469250000  | 5.739232190  | 0.000000000  |
| 9.465137636  | 5.742358131  | 3.927456874  |
| 9.469250000  | 3.826154793  | 1.913077397  |
| 9.339860902  | 3.711671626  | 5.719469701  |
| 6.763750000  | 5.739232190  | 0.000000000  |
| 6.741842117  | 5.727182824  | 3.927224963  |
| 5.411000000  | 3.826154793  | 0.000000000  |
| 5.435969919  | 3.832992690  | 3.849551599  |
| 8.116500000  | 5.739232190  | 1.913077397  |
| 8.103247578  | 5.754337178  | 5.749529289  |
| 7.073091817  | 5.387642776  | 8.546186812  |
| 4.659172036  | 6.656273664  | 8.365665872  |
| 6.619663936  | 4.591061698  | 9.735277499  |
| 4.855954310  | 6.936599671  | 9.432435726  |
| 5.088886965  | 3.720475353  | 6.389622413  |
| 5.190687030  | 7.260933104  | 7.604599278  |
| 6.450935665  | 5.307094137  | 10.559062896 |
| 5.661224075  | 4.081058684  | 9.552438809  |
| 7.400879764  | 3.877650031  | 10.036811766 |
| 3.629672156  | 6.023769301  | 8.102154743  |
| 6.753346821  | 3.640676226  | 5.796710162  |



CH<sub>3</sub>CO\*+HCOH\*

| ATOM |    | X (Angstroms) | Y (Angstroms) | Z (Angstroms) |
|------|----|---------------|---------------|---------------|
| 1    | O  | 1.352750      | 0.000000      | 1.913077      |
| 2    | O  | 1.377510      | -0.031249     | 5.819931      |
| 3    | O  | 4.058250      | 1.913077      | 0.000000      |
| 4    | O  | 4.047043      | 1.967757      | 3.914232      |
| 5    | O  | 4.058250      | 0.000000      | 1.913077      |
| 6    | O  | 3.957401      | 0.006146      | 5.727077      |
| 7    | O  | 1.352750      | 1.913077      | 0.000000      |
| 8    | O  | 1.327383      | 1.889098      | 3.895499      |
| 9    | Ce | 0.000000      | 0.000000      | 0.000000      |
| 10   | Ce | -0.048525     | -0.004810     | 3.933385      |
| 11   | Ce | 2.705500      | 1.913077      | 1.913077      |
| 12   | Ce | 2.652895      | 1.851416      | 5.661996      |
| 13   | O  | 6.763750      | 0.000000      | 1.913077      |
| 14   | O  | 6.788580      | 0.144652      | 5.756984      |
| 15   | O  | 9.469250      | 1.913077      | 0.000000      |
| 16   | O  | 9.425782      | 1.915941      | 3.816890      |
| 17   | O  | 9.469250      | 0.000000      | 1.913077      |
| 18   | O  | 9.340783      | 0.155329      | 5.733912      |
| 19   | O  | 6.763750      | 1.913077      | 0.000000      |
| 20   | O  | 6.794331      | 1.921128      | 3.813190      |
| 21   | Ce | 5.411000      | 0.000000      | 0.000000      |
| 22   | Ce | 5.426123      | -0.000609     | 3.934467      |
| 23   | Ce | 8.116500      | 1.913077      | 1.913077      |
| 24   | Zr | 8.104656      | 1.911805      | 5.419157      |
| 25   | O  | 1.352750      | 3.826155      | 1.913077      |
| 26   | O  | 1.514556      | 3.850631      | 5.725419      |
| 27   | O  | 4.058250      | 5.739232      | 0.000000      |
| 28   | O  | 3.993132      | 5.690884      | 3.796227      |
| 29   | O  | 4.058250      | 3.826155      | 1.913077      |
| 30   | O  | 4.138675      | 3.807148      | 6.082243      |
| 31   | O  | 1.352750      | 5.739232      | 0.000000      |
| 32   | O  | 1.400722      | 5.761444      | 3.755365      |
| 33   | Ce | 0.000000      | 3.826155      | 0.000000      |
| 34   | Ce | -0.017889     | 3.834295      | 3.936532      |
| 35   | Zr | 2.705500      | 5.739232      | 1.913077      |
| 36   | Ce | 2.669221      | 5.793576      | 5.659490      |
| 37   | O  | 6.763750      | 3.826155      | 1.913077      |
| 38   | O  | 8.943077      | 5.542896      | 8.211581      |
| 39   | O  | 9.469250      | 5.739232      | 0.000000      |
| 40   | O  | 9.469800      | 5.742030      | 3.934181      |
| 41   | O  | 9.469250      | 3.826155      | 1.913077      |
| 42   | O  | 9.344518      | 3.687329      | 5.710570      |
| 43   | O  | 6.763750      | 5.739232      | 0.000000      |
| 44   | O  | 6.740401      | 5.726011      | 3.925989      |
| 45   | Ce | 5.411000      | 3.826155      | 0.000000      |
| 46   | Ce | 5.446495      | 3.832626      | 3.854719      |
| 47   | Ce | 8.116500      | 5.739232      | 1.913077      |
| 48   | Ce | 8.114312      | 5.745099      | 5.780968      |
| 49   | C  | 7.746150      | 5.358063      | 8.404408      |
| 50   | C  | 4.698775      | 6.737089      | 8.403036      |
| 51   | C  | 7.251314      | 4.825325      | 9.726575      |
| 52   | H  | 5.073268      | 6.863691      | 9.444925      |
| 53   | H  | 5.089100      | 3.745462      | 6.403801      |
| 54   | H  | 5.239480      | 7.245720      | 7.580379      |
| 55   | H  | 6.949080      | 5.689151      | 10.344533     |
| 56   | H  | 6.363804      | 4.194524      | 9.578636      |

|    |   |          |          |           |
|----|---|----------|----------|-----------|
| 57 | H | 8.050159 | 4.276077 | 10.257164 |
| 58 | O | 3.693006 | 6.061320 | 8.205003  |
| 59 | O | 6.751012 | 3.640144 | 5.811481  |

**TS1-5**

| X (Angstroms) | Y (Angstroms) | Z (Angstroms) |
|---------------|---------------|---------------|
| 1.352750000   | 0.000000000   | 1.913077397   |
| 1.430034555   | -0.055960860  | 5.772704707   |
| 4.058250000   | 1.913077397   | 0.000000000   |
| 4.060287220   | 1.902095604   | 3.861835611   |
| 4.058250000   | 0.000000000   | 1.913077397   |
| 4.019708723   | -0.041616000  | 5.755579814   |
| 1.352750000   | 1.913077397   | 0.000000000   |
| 1.353191570   | 1.914233779   | 3.893335120   |
| 0.000000000   | 0.000000000   | 0.000000000   |
| 0.041252365   | -0.029822129  | 3.911233020   |
| 2.705500000   | 1.913077397   | 1.913077397   |
| 2.695177032   | 1.897933038   | 5.657047568   |
| 6.763750000   | 0.000000000   | 1.913077397   |
| 6.864988312   | 0.080071540   | 5.796544979   |
| 9.469250000   | 1.913077397   | 0.000000000   |
| 9.466543427   | 1.869281074   | 3.843049563   |
| 9.469250000   | 0.000000000   | 1.913077397   |
| 9.437047568   | 0.127160284   | 5.828620876   |
| 6.763750000   | 1.913077397   | 0.000000000   |
| 6.806808055   | 2.040733212   | 4.014942961   |
| 5.411000000   | 0.000000000   | 0.000000000   |
| 5.408869121   | 0.012031065   | 3.949851252   |
| 8.116500000   | 1.913077397   | 1.913077397   |
| 8.267509487   | 1.757285496   | 5.478302900   |
| 1.352750000   | 3.826154793   | 1.913077397   |
| 1.372848987   | 3.873942648   | 5.759082204   |
| 4.058250000   | 5.739232190   | 0.000000000   |
| 4.002887237   | 5.727221288   | 3.737451113   |
| 4.058250000   | 3.826154793   | 1.913077397   |
| 4.012271654   | 3.786651557   | 5.773533168   |
| 1.352750000   | 5.739232190   | 0.000000000   |
| 1.421355525   | 5.730575637   | 3.735435834   |
| 0.000000000   | 3.826154793   | 0.000000000   |
| -0.018028897  | 3.839433539   | 3.923901002   |
| 2.705500000   | 5.739232190   | 1.913077397   |
| 2.697570364   | 5.735425020   | 5.609704841   |
| 6.763750000   | 3.826154793   | 1.913077397   |
| 6.537725788   | 4.274903438   | 6.934964383   |
| 9.469250000   | 5.739232190   | 0.000000000   |
| 9.475211971   | 5.745572007   | 3.980304544   |
| 9.469250000   | 3.826154793   | 1.913077397   |
| 8.006585144   | 5.869434208   | 8.484966714   |
| 6.763750000   | 5.739232190   | 0.000000000   |
| 6.728218041   | 5.656377071   | 4.014453293   |
| 5.411000000   | 3.826154793   | 0.000000000   |
| 5.319735306   | 3.839197312   | 3.794417472   |
| 8.116500000   | 5.739232190   | 1.913077397   |
| 8.090316146   | 5.814967118   | 5.771850331   |
| 5.844439712   | 6.178556288   | 9.424983318   |
| 6.878771685   | 5.499396263   | 8.708950525   |
| 4.790998612   | 5.629963066   | 10.067516617  |
| 5.560808817   | 4.127468920   | 6.763848510   |

|             |             |              |
|-------------|-------------|--------------|
| 4.054486136 | 6.274000581 | 10.541791090 |
| 4.628995481 | 4.554461037 | 10.069608171 |
| 6.020490909 | 7.261283988 | 9.489975654  |
| 9.027190300 | 3.675794634 | 5.774381224  |

**CH<sub>2</sub>=CHCOO\***

| ATOM |    | X (Angstroms) | Y (Angstroms) | Z (Angstroms) |
|------|----|---------------|---------------|---------------|
| 1    | O  | 1.352750      | 0.000000      | 1.913077      |
| 2    | O  | 1.379349      | -0.040103     | 5.798323      |
| 3    | O  | 4.058250      | 1.913077      | 0.000000      |
| 4    | O  | 4.039301      | 1.952298      | 3.911573      |
| 5    | O  | 4.058250      | 0.000000      | 1.913077      |
| 6    | O  | 3.962383      | -0.034572     | 5.750067      |
| 7    | O  | 1.352750      | 1.913077      | 0.000000      |
| 8    | O  | 1.352550      | 1.906462      | 3.880573      |
| 9    | Ce | 0.000000      | 0.000000      | 0.000000      |
| 10   | Ce | 0.009579      | 0.001487      | 3.908445      |
| 11   | Ce | 2.705500      | 1.913077      | 1.913077      |
| 12   | Ce | 2.660670      | 1.835699      | 5.677776      |
| 13   | O  | 6.763750      | 0.000000      | 1.913077      |
| 14   | O  | 6.822998      | 0.139210      | 5.788434      |
| 15   | O  | 9.469250      | 1.913077      | 0.000000      |
| 16   | O  | 9.468661      | 1.944193      | 3.894820      |
| 17   | O  | 9.469250      | 0.000000      | 1.913077      |
| 18   | O  | 9.428898      | 0.128241      | 5.836003      |
| 19   | O  | 6.763750      | 1.913077      | 0.000000      |
| 20   | O  | 6.788253      | 2.000973      | 3.940429      |
| 21   | Ce | 5.411000      | 0.000000      | 0.000000      |
| 22   | Ce | 5.390807      | -0.009392     | 3.929331      |
| 23   | Ce | 8.116500      | 1.913077      | 1.913077      |
| 24   | Zr | 8.174768      | 1.720134      | 5.478922      |
| 25   | O  | 1.352750      | 3.826155      | 1.913077      |
| 26   | O  | 1.420378      | 3.867003      | 5.730625      |
| 27   | O  | 4.058250      | 5.739232      | 0.000000      |
| 28   | O  | 3.974168      | 5.700043      | 3.748795      |
| 29   | O  | 4.058250      | 3.826155      | 1.913077      |
| 30   | O  | 4.228318      | 3.840421      | 6.014689      |
| 31   | O  | 1.352750      | 5.739232      | 0.000000      |
| 32   | O  | 1.408006      | 5.755259      | 3.722941      |
| 33   | Ce | 0.000000      | 3.826155      | 0.000000      |
| 34   | Ce | 0.017674      | 3.853187      | 3.833690      |
| 35   | Zr | 2.705500      | 5.739232      | 1.913077      |
| 36   | Ce | 2.653319      | 5.784353      | 5.617024      |
| 37   | O  | 6.763750      | 3.826155      | 1.913077      |
| 38   | O  | 6.145751      | 5.105820      | 7.439719      |
| 39   | O  | 9.469250      | 5.739232      | 0.000000      |
| 40   | O  | 9.504199      | 5.715386      | 4.021896      |
| 41   | O  | 9.469250      | 3.826155      | 1.913077      |
| 42   | O  | 8.009458      | 5.836677      | 8.421816      |
| 43   | O  | 6.763750      | 5.739232      | 0.000000      |
| 44   | O  | 6.714630      | 5.662734      | 4.041428      |
| 45   | Ce | 5.411000      | 3.826155      | 0.000000      |
| 46   | Ce | 5.389017      | 3.830420      | 3.744828      |
| 47   | Ce | 8.116500      | 5.739232      | 1.913077      |
| 48   | Ce | 8.085326      | 5.909402      | 5.888130      |
| 49   | C  | 6.352125      | 4.891298      | 9.830273      |
| 50   | C  | 6.858064      | 5.298180      | 8.488774      |
| 51   | C  | 5.190521      | 4.250798      | 10.014428     |

|    |   |          |          |           |
|----|---|----------|----------|-----------|
| 52 | H | 4.903865 | 4.120451 | 6.692200  |
| 53 | H | 4.849961 | 3.947322 | 11.007540 |
| 54 | H | 4.550292 | 4.004048 | 9.163119  |
| 55 | H | 7.012538 | 5.138729 | 10.666453 |
| 56 | O | 8.419738 | 3.641682 | 6.049811  |

**CH<sub>2</sub>=CHCOO\*+Q\***

| ATOM |    | X (Angstroms) | Y (Angstroms) | Z (Angstroms) |
|------|----|---------------|---------------|---------------|
| 1    | O  | 1.352750      | 0.000000      | 1.913077      |
| 2    | O  | 1.409223      | -0.038329     | 5.791467      |
| 3    | O  | 4.058250      | 1.913077      | 0.000000      |
| 4    | O  | 4.063956      | 1.949544      | 3.922596      |
| 5    | O  | 4.058250      | 0.000000      | 1.913077      |
| 6    | O  | 3.980899      | -0.032957     | 5.764347      |
| 7    | O  | 1.352750      | 1.913077      | 0.000000      |
| 8    | O  | 1.363660      | 1.894386      | 3.891527      |
| 9    | Ce | 0.000000      | 0.000000      | 0.000000      |
| 10   | Ce | 0.001786      | 0.001458      | 3.877125      |
| 11   | Ce | 2.705500      | 1.913077      | 1.913077      |
| 12   | Ce | 2.668907      | 1.838438      | 5.671103      |
| 13   | O  | 6.763750      | 0.000000      | 1.913077      |
| 14   | O  | 6.907236      | 0.045708      | 5.662775      |
| 15   | O  | 9.469250      | 1.913077      | 0.000000      |
| 16   | O  | 9.473709      | 1.887994      | 3.778630      |
| 17   | O  | 9.469250      | 0.000000      | 1.913077      |
| 18   | O  | 9.456909      | 0.203750      | 5.780386      |
| 19   | O  | 6.763750      | 1.913077      | 0.000000      |
| 20   | O  | 6.814263      | 1.951587      | 3.878379      |
| 21   | Ce | 5.411000      | 0.000000      | 0.000000      |
| 22   | Ce | 5.461442      | -0.022966     | 3.939224      |
| 23   | Ce | 8.116500      | 1.913077      | 1.913077      |
| 24   | Zr | 8.206182      | 1.811916      | 5.474460      |
| 25   | O  | 1.352750      | 3.826155      | 1.913077      |
| 26   | O  | 1.528009      | 3.859032      | 5.707084      |
| 27   | O  | 4.058250      | 5.739232      | 0.000000      |
| 28   | O  | 4.001493      | 5.688658      | 3.778274      |
| 29   | O  | 4.058250      | 3.826155      | 1.913077      |
| 30   | O  | 4.108954      | 3.815263      | 6.098194      |
| 31   | O  | 1.352750      | 5.739232      | 0.000000      |
| 32   | O  | 1.431025      | 5.768688      | 3.742029      |
| 33   | Ce | 0.000000      | 3.826155      | 0.000000      |
| 34   | Ce | -0.031349     | 3.839031      | 3.957994      |
| 35   | Zr | 2.705500      | 5.739232      | 1.913077      |
| 36   | Ce | 2.681306      | 5.796171      | 5.625101      |
| 37   | O  | 6.763750      | 3.826155      | 1.913077      |
| 38   | O  | 7.151020      | 5.759815      | 8.123518      |
| 39   | O  | 9.469250      | 5.739232      | 0.000000      |
| 40   | O  | 9.503666      | 5.783433      | 3.938026      |
| 41   | O  | 9.469250      | 3.826155      | 1.913077      |
| 42   | O  | 9.381551      | 5.793204      | 8.068846      |
| 43   | O  | 6.763750      | 5.739232      | 0.000000      |
| 44   | O  | 6.742475      | 5.695917      | 3.885139      |
| 45   | Ce | 5.411000      | 3.826155      | 0.000000      |
| 46   | Ce | 5.427606      | 3.834310      | 3.813966      |
| 47   | Ce | 8.116500      | 5.739232      | 1.913077      |
| 48   | Ce | 8.223009      | 5.867030      | 5.867663      |
| 49   | C  | 8.352921      | 5.588589      | 10.199694     |
| 50   | C  | 8.280754      | 5.721711      | 8.720454      |

|    |   |          |          |           |
|----|---|----------|----------|-----------|
| 51 | C | 7.266986 | 5.471619 | 10.973982 |
| 52 | H | 4.925780 | 3.726403 | 6.645854  |
| 53 | H | 7.344203 | 5.366228 | 12.059945 |
| 54 | H | 6.268688 | 5.475220 | 10.527574 |
| 55 | H | 9.364829 | 5.582747 | 10.615918 |
| 56 | O | 9.361460 | 3.664920 | 5.668233  |
| 57 | O | 6.753629 | 3.955945 | 5.798091  |
| 58 | O | 6.787762 | 2.880198 | 6.743928  |

**TS1-6**

| X (Angstroms) | Y (Angstroms) | Z (Angstroms) |
|---------------|---------------|---------------|
| 1.352750000   | 0.000000000   | 1.913077397   |
| 1.386507934   | -0.035351126  | 5.804929765   |
| 4.058250000   | 1.913077397   | 0.000000000   |
| 4.073249358   | 1.974467964   | 3.932649148   |
| 4.058250000   | 0.000000000   | 1.913077397   |
| 3.977300423   | -0.036566349  | 5.771852767   |
| 1.352750000   | 1.913077397   | 0.000000000   |
| 1.346850751   | 1.877241714   | 3.895841640   |
| 0.000000000   | 0.000000000   | 0.000000000   |
| -0.023339320  | -0.008271650  | 3.906276604   |
| 2.705500000   | 1.913077397   | 1.913077397   |
| 2.666832379   | 1.834657978   | 5.680037229   |
| 6.763750000   | 0.000000000   | 1.913077397   |
| 6.839744751   | 0.099515094   | 5.717888702   |
| 9.469250000   | 1.913077397   | 0.000000000   |
| 9.443304935   | 1.885498328   | 3.800012933   |
| 9.469250000   | 0.000000000   | 1.913077397   |
| 9.406752169   | 0.176920983   | 5.770135255   |
| 6.763750000   | 1.913077397   | 0.000000000   |
| 6.816127326   | 2.025114090   | 3.940491186   |
| 5.411000000   | 0.000000000   | 0.000000000   |
| 5.452573623   | 0.014588403   | 3.969207171   |
| 8.116500000   | 1.913077397   | 1.913077397   |
| 8.243304056   | 1.843494496   | 5.458665270   |
| 1.352750000   | 3.826154793   | 1.913077397   |
| 1.536119659   | 3.855971781   | 5.707736655   |
| 4.058250000   | 5.739232190   | 0.000000000   |
| 4.012563943   | 5.686847401   | 3.783021452   |
| 4.058250000   | 3.826154793   | 1.913077397   |
| 4.155035778   | 3.835708452   | 6.101334487   |
| 1.352750000   | 5.739232190   | 0.000000000   |
| 1.422031162   | 5.766849071   | 3.744694759   |
| 0.000000000   | 3.826154793   | 0.000000000   |
| 0.002732282   | 3.826856919   | 3.919735666   |
| 2.705500000   | 5.739232190   | 1.913077397   |
| 2.664791627   | 5.788657521   | 5.633574647   |
| 6.763750000   | 3.826154793   | 1.913077397   |
| 8.737239332   | 7.786232524   | 8.867313170   |
| 9.469250000   | 5.739232190   | 0.000000000   |
| 9.488723685   | 5.756045035   | 3.930744123   |
| 9.469250000   | 3.826154793   | 1.913077397   |
| 10.592489387  | 6.361981042   | 8.595149543   |
| 6.763750000   | 5.739232190   | 0.000000000   |
| 6.745515546   | 5.663240495   | 3.947028319   |
| 5.411000000   | 3.826154793   | 0.000000000   |
| 5.382359050   | 3.852547700   | 3.773386994   |
| 8.116500000   | 5.739232190   | 1.913077397   |

|             |             |              |
|-------------|-------------|--------------|
| 8.158379820 | 5.831785338 | 5.719275698  |
| 8.405483658 | 4.844584635 | 9.960517817  |
| 9.635400381 | 7.013307203 | 8.802590170  |
| 7.424426982 | 5.102911187 | 10.789236885 |
| 5.046116091 | 3.789610977 | 6.543826175  |
| 7.377087130 | 4.563442929 | 11.742676952 |
| 6.626521098 | 5.849005211 | 10.617812326 |
| 9.170153335 | 4.073780922 | 9.954255619  |
| 9.404298555 | 3.657480888 | 5.651831835  |
| 6.882513735 | 3.635094546 | 6.251018995  |
| 7.367688958 | 4.525269278 | 7.286243756  |

**CH<sub>2</sub>=CHO\*+CO<sub>2</sub>\***

| ATOM |    | X (Angstroms) | Y (Angstroms) | Z (Angstroms) |
|------|----|---------------|---------------|---------------|
| 1    | O  | 1.352750      | 0.000000      | 1.913077      |
| 2    | O  | 1.370972      | -0.035061     | 5.810910      |
| 3    | O  | 4.058250      | 1.913077      | 0.000000      |
| 4    | O  | 4.047296      | 1.960786      | 3.942830      |
| 5    | O  | 4.058250      | 0.000000      | 1.913077      |
| 6    | O  | 3.944522      | -0.034181     | 5.778669      |
| 7    | O  | 1.352750      | 1.913077      | 0.000000      |
| 8    | O  | 1.333168      | 1.881453      | 3.905123      |
| 9    | Ce | 0.000000      | 0.000000      | 0.000000      |
| 10   | Ce | -0.048851     | -0.003301     | 3.932166      |
| 11   | Ce | 2.705500      | 1.913077      | 1.913077      |
| 12   | Ce | 2.659100      | 1.836630      | 5.681791      |
| 13   | O  | 6.763750      | 0.000000      | 1.913077      |
| 14   | O  | 6.795866      | 0.136663      | 5.689840      |
| 15   | O  | 9.469250      | 1.913077      | 0.000000      |
| 16   | O  | 9.425174      | 1.919760      | 3.818733      |
| 17   | O  | 9.469250      | 0.000000      | 1.913077      |
| 18   | O  | 9.350721      | 0.159471      | 5.732439      |
| 19   | O  | 6.763750      | 1.913077      | 0.000000      |
| 20   | O  | 6.799211      | 1.931252      | 3.806154      |
| 21   | Ce | 5.411000      | 0.000000      | 0.000000      |
| 22   | Ce | 5.439893      | -0.001929     | 3.933852      |
| 23   | Ce | 8.116500      | 1.913077      | 1.913077      |
| 24   | Zr | 8.112984      | 1.903803      | 5.423700      |
| 25   | O  | 1.352750      | 3.826155      | 1.913077      |
| 26   | O  | 1.512849      | 3.850552      | 5.712096      |
| 27   | O  | 4.058250      | 5.739232      | 0.000000      |
| 28   | O  | 3.995057      | 5.689778      | 3.786689      |
| 29   | O  | 4.058250      | 3.826155      | 1.913077      |
| 30   | O  | 4.116560      | 3.841902      | 6.134870      |
| 31   | O  | 1.352750      | 5.739232      | 0.000000      |
| 32   | O  | 1.408620      | 5.762329      | 3.747103      |
| 33   | Ce | 0.000000      | 3.826155      | 0.000000      |
| 34   | Ce | -0.011217     | 3.834323      | 3.931161      |
| 35   | Zr | 2.705500      | 5.739232      | 1.913077      |
| 36   | Ce | 2.668949      | 5.791896      | 5.623162      |
| 37   | O  | 6.763750      | 3.826155      | 1.913077      |
| 38   | O  | 9.595355      | 8.757217      | 8.733890      |
| 39   | O  | 9.469250      | 5.739232      | 0.000000      |
| 40   | O  | 9.482981      | 5.736391      | 3.935183      |
| 41   | O  | 9.469250      | 3.826155      | 1.913077      |
| 42   | O  | 11.097034     | 6.949808      | 8.742777      |
| 43   | O  | 6.763750      | 5.739232      | 0.000000      |
| 44   | O  | 6.738798      | 5.721041      | 3.903375      |

|    |    |           |          |           |
|----|----|-----------|----------|-----------|
| 45 | Ce | 5.411000  | 3.826155 | 0.000000  |
| 46 | Ce | 5.452514  | 3.828345 | 3.854351  |
| 47 | Ce | 8.116500  | 5.739232 | 1.913077  |
| 48 | Ce | 8.107210  | 5.721281 | 5.778760  |
| 49 | C  | 8.277589  | 4.805803 | 9.051733  |
| 50 | C  | 10.333411 | 7.842500 | 8.717102  |
| 51 | C  | 7.677297  | 4.978589 | 10.263524 |
| 52 | H  | 5.069394  | 3.778390 | 6.441496  |
| 53 | H  | 7.810278  | 4.235332 | 11.053153 |
| 54 | H  | 7.059654  | 5.857437 | 10.464756 |
| 55 | H  | 8.890103  | 3.905963 | 8.872350  |
| 56 | O  | 9.345444  | 3.684371 | 5.719917  |
| 57 | O  | 6.743083  | 3.671889 | 5.774723  |
| 58 | O  | 8.179474  | 5.651516 | 8.049021  |

**C<sub>2</sub>H<sub>3</sub>COONO<sub>2</sub>\***

| ATOM |    | X (Angstroms) | Y (Angstroms) | Z (Angstroms) |
|------|----|---------------|---------------|---------------|
| 1    | O  | 1.352750      | 0.000000      | 1.913077      |
| 2    | O  | 1.413249      | -0.028419     | 5.770940      |
| 3    | O  | 4.058250      | 1.913077      | 0.000000      |
| 4    | O  | 4.062340      | 1.913643      | 3.895064      |
| 5    | O  | 4.058250      | 0.000000      | 1.913077      |
| 6    | O  | 3.998423      | -0.027835     | 5.771387      |
| 7    | O  | 1.352750      | 1.913077      | 0.000000      |
| 8    | O  | 1.347236      | 1.913241      | 3.891141      |
| 9    | Ce | 0.000000      | 0.000000      | 0.000000      |
| 10   | Ce | -0.008705     | 0.000717      | 3.942859      |
| 11   | Ce | 2.705500      | 1.913077      | 1.913077      |
| 12   | Ce | 2.698854      | 1.908718      | 5.651835      |
| 13   | O  | 6.763750      | 0.000000      | 1.913077      |
| 14   | O  | 6.860281      | 0.109746      | 5.756477      |
| 15   | O  | 9.469250      | 1.913077      | 0.000000      |
| 16   | O  | 9.428181      | 1.911519      | 3.854345      |
| 17   | O  | 9.469250      | 0.000000      | 1.913077      |
| 18   | O  | 9.380648      | 0.085924      | 5.748097      |
| 19   | O  | 6.763750      | 1.913077      | 0.000000      |
| 20   | O  | 6.800417      | 1.908778      | 3.845898      |
| 21   | Ce | 5.411000      | 0.000000      | 0.000000      |
| 22   | Ce | 5.418569      | -0.000892     | 3.949169      |
| 23   | Ce | 8.116500      | 1.913077      | 1.913077      |
| 24   | Zr | 8.107002      | 1.918516      | 5.439566      |
| 25   | O  | 1.352750      | 3.826155      | 1.913077      |
| 26   | O  | 1.410331      | 3.854895      | 5.772668      |
| 27   | O  | 4.058250      | 5.739232      | 0.000000      |
| 28   | O  | 4.003742      | 5.735187      | 3.747044      |
| 29   | O  | 4.058250      | 3.826155      | 1.913077      |
| 30   | O  | 4.000077      | 3.847461      | 5.791795      |
| 31   | O  | 1.352750      | 5.739232      | 0.000000      |
| 32   | O  | 1.409476      | 5.741578      | 3.742074      |
| 33   | Ce | 0.000000      | 3.826155      | 0.000000      |
| 34   | Ce | -0.008748     | 3.830655      | 3.942862      |
| 35   | Zr | 2.705500      | 5.739232      | 1.913077      |
| 36   | Ce | 2.701504      | 5.740312      | 5.596228      |
| 37   | O  | 6.763750      | 3.826155      | 1.913077      |
| 38   | O  | 6.836412      | 3.694794      | 5.754200      |
| 39   | O  | 9.469250      | 5.739232      | 0.000000      |
| 40   | O  | 9.472224      | 5.749676      | 3.911062      |
| 41   | O  | 9.469250      | 3.826155      | 1.913077      |

|    |    |          |          |           |
|----|----|----------|----------|-----------|
| 42 | O  | 9.373684 | 3.751532 | 5.716241  |
| 43 | O  | 6.763750 | 5.739232 | 0.000000  |
| 44 | O  | 6.762557 | 5.738685 | 3.934876  |
| 45 | Ce | 5.411000 | 3.826155 | 0.000000  |
| 46 | Ce | 5.419026 | 3.824431 | 3.950644  |
| 47 | Ce | 8.116500 | 5.739232 | 1.913077  |
| 48 | Ce | 8.135034 | 5.753050 | 5.693141  |
| 49 | N  | 8.250436 | 3.158235 | 9.062595  |
| 50 | O  | 8.405532 | 3.115037 | 10.251052 |
| 51 | O  | 8.341837 | 2.334974 | 8.196137  |
| 52 | O  | 7.963001 | 4.638523 | 8.527415  |
| 53 | C  | 5.807407 | 4.646917 | 9.705285  |
| 54 | C  | 7.039399 | 5.350651 | 9.312579  |
| 55 | C  | 5.194916 | 3.753227 | 8.910142  |
| 56 | O  | 7.272136 | 6.524396 | 9.506750  |
| 57 | H  | 5.351120 | 5.009573 | 10.631165 |
| 58 | H  | 4.227143 | 3.337629 | 9.205533  |
| 59 | H  | 5.590891 | 3.463872 | 7.930035  |

**TS4-1**

| X (Angstroms) | Y (Angstroms) | Z (Angstroms) |
|---------------|---------------|---------------|
| 1.352750000   | 0.000000000   | 1.913077397   |
| 1.410459654   | -0.027919579  | 5.761991859   |
| 4.058250000   | 1.913077397   | 0.000000000   |
| 4.058611984   | 1.918494750   | 3.891786322   |
| 4.058250000   | 0.000000000   | 1.913077397   |
| 3.993582069   | -0.020603174  | 5.765408780   |
| 1.352750000   | 1.913077397   | 0.000000000   |
| 1.350920573   | 1.913750237   | 3.885532982   |
| 0.000000000   | 0.000000000   | 0.000000000   |
| -0.014043668  | -0.005572073  | 3.932782398   |
| 2.705500000   | 1.913077397   | 1.913077397   |
| 2.697593135   | 1.914585503   | 5.659515334   |
| 6.763750000   | 0.000000000   | 1.913077397   |
| 6.862142647   | 0.114855835   | 5.742964727   |
| 9.469250000   | 1.913077397   | 0.000000000   |
| 9.428602940   | 1.910759317   | 3.847393976   |
| 9.469250000   | 0.000000000   | 1.913077397   |
| 9.375137633   | 0.100871369   | 5.727777664   |
| 6.763750000   | 1.913077397   | 0.000000000   |
| 6.811114084   | 1.915557925   | 3.853851087   |
| 5.411000000   | 0.000000000   | 0.000000000   |
| 5.429985130   | -0.001242517  | 3.947191195   |
| 8.116500000   | 1.913077397   | 1.913077397   |
| 8.130992866   | 1.918996164   | 5.471181365   |
| 1.352750000   | 3.826154793   | 1.913077397   |
| 1.415031123   | 3.856710049   | 5.760636519   |
| 4.058250000   | 5.739232190   | 0.000000000   |
| 3.998631205   | 5.736283028   | 3.744563055   |
| 4.058250000   | 3.826154793   | 1.913077397   |
| 4.002118560   | 3.846888528   | 5.790846334   |
| 1.352750000   | 5.739232190   | 0.000000000   |
| 1.416083753   | 5.740577716   | 3.735671477   |
| 0.000000000   | 3.826154793   | 0.000000000   |
| -0.017137751  | 3.834215113   | 3.935894773   |
| 2.705500000   | 5.739232190   | 1.913077397   |
| 2.705174931   | 5.739216346   | 5.606175519   |
| 6.763750000   | 3.826154793   | 1.913077397   |



|             |             |              |
|-------------|-------------|--------------|
| 6.847918688 | 3.715474333 | 5.741330516  |
| 9.469250000 | 5.739232190 | 0.000000000  |
| 9.476038362 | 5.744499122 | 3.918326223  |
| 9.469250000 | 3.826154793 | 1.913077397  |
| 9.375649611 | 3.725863940 | 5.710461813  |
| 6.763750000 | 5.739232190 | 0.000000000  |
| 6.758347898 | 5.743718272 | 3.931332725  |
| 5.411000000 | 3.826154793 | 0.000000000  |
| 5.430066772 | 3.832533616 | 3.946670765  |
| 8.116500000 | 5.739232190 | 1.913077397  |
| 8.129065106 | 5.748116016 | 5.791141111  |
| 8.491423785 | 2.821591644 | 8.991500259  |
| 9.578142415 | 3.068357024 | 9.414497350  |
| 8.175356844 | 2.102522921 | 8.046800827  |
| 8.113931948 | 5.309705539 | 8.231071192  |
| 6.918456217 | 3.721915769 | 9.616415478  |
| 7.161187055 | 5.170582615 | 9.088220134  |
| 5.977939718 | 2.945632911 | 8.910500971  |
| 6.356310210 | 6.000762606 | 9.522771485  |
| 6.876826190 | 3.663830018 | 10.726179274 |
| 5.473224256 | 2.087673364 | 9.368149895  |
| 5.915268338 | 3.090801442 | 7.826595533  |

**CO<sub>2</sub>C<sub>2</sub>H<sub>3</sub>NO<sub>2</sub>\***

| ATOM |    | X (Angstroms) | Y (Angstroms) | Z (Angstroms) |
|------|----|---------------|---------------|---------------|
| 1    | O  | 1.352750      | 0.000000      | 1.913077      |
| 2    | O  | 1.412221      | -0.027930     | 5.765712      |
| 3    | O  | 4.058250      | 1.913077      | 0.000000      |
| 4    | O  | 4.061355      | 1.917494      | 3.892133      |
| 5    | O  | 4.058250      | 0.000000      | 1.913077      |
| 6    | O  | 3.994711      | -0.018912     | 5.774697      |
| 7    | O  | 1.352750      | 1.913077      | 0.000000      |
| 8    | O  | 1.350474      | 1.914713      | 3.887620      |
| 9    | Ce | 0.000000      | 0.000000      | 0.000000      |
| 10   | Ce | -0.007866     | -0.004064     | 3.941475      |
| 11   | Ce | 2.705500      | 1.913077      | 1.913077      |
| 12   | Ce | 2.696362      | 1.915953      | 5.655595      |
| 13   | O  | 6.763750      | 0.000000      | 1.913077      |
| 14   | O  | 6.848190      | 0.114556      | 5.746087      |
| 15   | O  | 9.469250      | 1.913077      | 0.000000      |
| 16   | O  | 9.442474      | 1.905119      | 3.829894      |
| 17   | O  | 9.469250      | 0.000000      | 1.913077      |
| 18   | O  | 9.375896      | 0.101895      | 5.726566      |
| 19   | O  | 6.763750      | 1.913077      | 0.000000      |
| 20   | O  | 6.805449      | 1.905528      | 3.839288      |
| 21   | Ce | 5.411000      | 0.000000      | 0.000000      |
| 22   | Ce | 5.420972      | 0.000884      | 3.952014      |
| 23   | Ce | 8.116500      | 1.913077      | 1.913077      |
| 24   | Zr | 8.132311      | 1.900603      | 5.432251      |
| 25   | O  | 1.352750      | 3.826155      | 1.913077      |
| 26   | O  | 1.416179      | 3.857325      | 5.764709      |
| 27   | O  | 4.058250      | 5.739232      | 0.000000      |
| 28   | O  | 4.001182      | 5.734236      | 3.747614      |
| 29   | O  | 4.058250      | 3.826155      | 1.913077      |
| 30   | O  | 4.007359      | 3.844514      | 5.795773      |
| 31   | O  | 1.352750      | 5.739232      | 0.000000      |
| 32   | O  | 1.413798      | 5.738900      | 3.739387      |
| 33   | Ce | 0.000000      | 3.826155      | 0.000000      |

|    |    |           |          |           |
|----|----|-----------|----------|-----------|
| 34 | Ce | -0.011485 | 3.827924 | 3.941279  |
| 35 | Zr | 2.705500  | 5.739232 | 1.913077  |
| 36 | Ce | 2.705545  | 5.739220 | 5.604763  |
| 37 | O  | 6.763750  | 3.826155 | 1.913077  |
| 38 | O  | 6.841148  | 3.710249 | 5.752227  |
| 39 | O  | 9.469250  | 5.739232 | 0.000000  |
| 40 | O  | 9.475141  | 5.744241 | 3.916107  |
| 41 | O  | 9.469250  | 3.826155 | 1.913077  |
| 42 | O  | 9.375557  | 3.704391 | 5.726548  |
| 43 | O  | 6.763750  | 5.739232 | 0.000000  |
| 44 | O  | 6.751949  | 5.748466 | 3.926611  |
| 45 | Ce | 5.411000  | 3.826155 | 0.000000  |
| 46 | Ce | 5.419722  | 3.828690 | 3.946255  |
| 47 | Ce | 8.116500  | 5.739232 | 1.913077  |
| 48 | Ce | 8.113454  | 5.755195 | 5.725863  |
| 49 | N  | 8.674289  | 2.835752 | 8.869319  |
| 50 | O  | 9.850967  | 3.024780 | 8.825916  |
| 51 | O  | 7.938787  | 1.936611 | 7.992357  |
| 52 | O  | 8.085339  | 5.526007 | 8.263431  |
| 53 | C  | 7.483978  | 3.443527 | 9.425498  |
| 54 | C  | 7.211650  | 5.005834 | 8.995947  |
| 55 | C  | 6.675946  | 2.430216 | 8.613327  |
| 56 | O  | 6.150494  | 5.384721 | 9.490069  |
| 57 | H  | 7.474934  | 3.409013 | 10.522955 |
| 58 | H  | 6.205384  | 1.604953 | 9.160799  |
| 59 | H  | 6.044389  | 2.863308 | 7.827083  |

#### TS4-2

| X (Angstroms) | Y (Angstroms) | Z (Angstroms) |
|---------------|---------------|---------------|
| 1.352750000   | 0.000000000   | 1.913077397   |
| 1.411591698   | -0.027452770  | 5.765628196   |
| 4.058250000   | 1.913077397   | 0.000000000   |
| 4.062350312   | 1.919465203   | 3.892521583   |
| 4.058250000   | 0.000000000   | 1.913077397   |
| 3.995909122   | -0.016929738  | 5.776007388   |
| 1.352750000   | 1.913077397   | 0.000000000   |
| 1.351374321   | 1.915526626   | 3.887769072   |
| 0.000000000   | 0.000000000   | 0.000000000   |
| -0.005533895  | -0.003438558  | 3.938167732   |
| 2.705500000   | 1.913077397   | 1.913077397   |
| 2.696691064   | 1.916349892   | 5.654272120   |
| 6.763750000   | 0.000000000   | 1.913077397   |
| 6.848170230   | 0.107915563   | 5.747140227   |
| 9.469250000   | 1.913077397   | 0.000000000   |
| 9.443951557   | 1.907876602   | 3.830118121   |
| 9.469250000   | 0.000000000   | 1.913077397   |
| 9.376765007   | 0.101522153   | 5.723467675   |
| 6.763750000   | 1.913077397   | 0.000000000   |
| 6.807387367   | 1.911280904   | 3.844615532   |
| 5.411000000   | 0.000000000   | 0.000000000   |
| 5.419735320   | 0.003349904   | 3.949756659   |
| 8.116500000   | 1.913077397   | 1.913077397   |
| 8.138894217   | 1.904368859   | 5.433377496   |
| 1.352750000   | 3.826154793   | 1.913077397   |
| 1.416348450   | 3.859415122   | 5.764297235   |
| 4.058250000   | 5.739232190   | 0.000000000   |
| 4.002058888   | 5.734842385   | 3.748738150   |
| 4.058250000   | 3.826154793   | 1.913077397   |

|              |             |              |
|--------------|-------------|--------------|
| 4.007982622  | 3.844879103 | 5.799187401  |
| 1.352750000  | 5.739232190 | 0.000000000  |
| 1.413928482  | 5.739774629 | 3.738819743  |
| 0.000000000  | 3.826154793 | 0.000000000  |
| -0.010499245 | 3.829057480 | 3.940472145  |
| 2.705500000  | 5.739232190 | 1.913077397  |
| 2.704666676  | 5.741249873 | 5.600933229  |
| 6.763750000  | 3.826154793 | 1.913077397  |
| 6.843903702  | 3.723655470 | 5.754473115  |
| 9.469250000  | 5.739232190 | 0.000000000  |
| 9.474538068  | 5.741835952 | 3.916528479  |
| 9.469250000  | 3.826154793 | 1.913077397  |
| 9.374757130  | 3.708162220 | 5.724677193  |
| 6.763750000  | 5.739232190 | 0.000000000  |
| 6.754219494  | 5.745979453 | 3.925015838  |
| 5.411000000  | 3.826154793 | 0.000000000  |
| 5.421071260  | 3.828733834 | 3.947751811  |
| 8.116500000  | 5.739232190 | 1.913077397  |
| 8.117970823  | 5.756257952 | 5.705255994  |
| 8.652552544  | 2.830638391 | 8.895425504  |
| 9.826000366  | 3.013979045 | 8.882194231  |
| 7.940098948  | 1.912392757 | 7.981115016  |
| 8.103475953  | 5.568785494 | 8.334365036  |
| 7.481605798  | 3.347578359 | 9.458391251  |
| 7.188300957  | 5.194070001 | 9.040123743  |
| 6.671552249  | 2.394027894 | 8.599399502  |
| 6.174914154  | 5.549782792 | 9.588120599  |
| 7.454467162  | 3.344222904 | 10.552308205 |
| 6.176655036  | 1.562325289 | 9.115576177  |
| 6.053209933  | 2.842524458 | 7.802811434  |

**C<sub>2</sub>H<sub>3</sub>NO<sub>2</sub>\*+CO<sub>2</sub>\***

| ATOM |    | X (Angstroms) | Y (Angstroms) | Z (Angstroms) |
|------|----|---------------|---------------|---------------|
| 1    | O  | 1.352750      | 0.000000      | 1.913077      |
| 2    | O  | 1.407935      | -0.037426     | 5.769376      |
| 3    | O  | 4.058250      | 1.913077      | 0.000000      |
| 4    | O  | 4.067421      | 1.914018      | 3.894963      |
| 5    | O  | 4.058250      | 0.000000      | 1.913077      |
| 6    | O  | 3.996085      | -0.016903     | 5.801183      |
| 7    | O  | 1.352750      | 1.913077      | 0.000000      |
| 8    | O  | 1.353291      | 1.911555      | 3.887848      |
| 9    | Ce | 0.000000      | 0.000000      | 0.000000      |
| 10   | Ce | -0.005413     | -0.000692     | 3.934013      |
| 11   | Ce | 2.705500      | 1.913077      | 1.913077      |
| 12   | Ce | 2.694867      | 1.910566      | 5.652183      |
| 13   | O  | 6.763750      | 0.000000      | 1.913077      |
| 14   | O  | 6.832093      | 0.043656      | 5.749828      |
| 15   | O  | 9.469250      | 1.913077      | 0.000000      |
| 16   | O  | 9.453362      | 1.915562      | 3.833937      |
| 17   | O  | 9.469250      | 0.000000      | 1.913077      |
| 18   | O  | 9.375915      | 0.116824      | 5.722059      |
| 19   | O  | 6.763750      | 1.913077      | 0.000000      |
| 20   | O  | 6.819743      | 1.918651      | 3.884611      |
| 21   | Ce | 5.411000      | 0.000000      | 0.000000      |
| 22   | Ce | 5.421601      | 0.002021      | 3.951969      |
| 23   | Ce | 8.116500      | 1.913077      | 1.913077      |
| 24   | Zr | 8.169499      | 1.913146      | 5.461423      |
| 25   | O  | 1.352750      | 3.826155      | 1.913077      |

|    |    |           |          |           |
|----|----|-----------|----------|-----------|
| 26 | O  | 1.411295  | 3.860470 | 5.762200  |
| 27 | O  | 4.058250  | 5.739232 | 0.000000  |
| 28 | O  | 4.006124  | 5.735923 | 3.757385  |
| 29 | O  | 4.058250  | 3.826155 | 1.913077  |
| 30 | O  | 4.003867  | 3.828558 | 5.813975  |
| 31 | O  | 1.352750  | 5.739232 | 0.000000  |
| 32 | O  | 1.414471  | 5.739133 | 3.737413  |
| 33 | Ce | 0.000000  | 3.826155 | 0.000000  |
| 34 | Ce | -0.004900 | 3.824198 | 3.934811  |
| 35 | Zr | 2.705500  | 5.739232 | 1.913077  |
| 36 | Ce | 2.700240  | 5.737650 | 5.596556  |
| 37 | O  | 6.763750  | 3.826155 | 1.913077  |
| 38 | O  | 6.839405  | 3.794316 | 5.751275  |
| 39 | O  | 9.469250  | 5.739232 | 0.000000  |
| 40 | O  | 9.477630  | 5.734451 | 3.912719  |
| 41 | O  | 9.469250  | 3.826155 | 1.913077  |
| 42 | O  | 9.373338  | 3.700600 | 5.738759  |
| 43 | O  | 6.763750  | 5.739232 | 0.000000  |
| 44 | O  | 6.758881  | 5.741759 | 3.890174  |
| 45 | Ce | 5.411000  | 3.826155 | 0.000000  |
| 46 | Ce | 5.420385  | 3.828411 | 3.945371  |
| 47 | Ce | 8.116500  | 5.739232 | 1.913077  |
| 48 | Ce | 8.102313  | 5.740275 | 5.665730  |
| 49 | N  | 8.050753  | 2.682585 | 9.109043  |
| 50 | O  | 9.173027  | 2.923580 | 9.464500  |
| 51 | O  | 7.660257  | 1.701659 | 7.881964  |
| 52 | O  | 8.298179  | 6.006599 | 8.603017  |
| 53 | C  | 6.781897  | 2.888009 | 9.357378  |
| 54 | C  | 8.063571  | 6.755774 | 9.478454  |
| 55 | C  | 6.275243  | 2.070158 | 8.226917  |
| 56 | O  | 7.821104  | 7.460291 | 10.383837 |
| 57 | H  | 6.397738  | 3.486260 | 10.182322 |
| 58 | H  | 5.692075  | 1.168570 | 8.464315  |
| 59 | H  | 5.820231  | 2.655299 | 7.408895  |

**C<sub>2</sub>H<sub>3</sub>NO<sub>2</sub>\***

| ATOM |    | X (Angstroms) | Y (Angstroms) | Z (Angstroms) |
|------|----|---------------|---------------|---------------|
| 1    | O  | 1.352750      | 0.000000      | 1.913077      |
| 2    | O  | 1.403195      | -0.035920     | 5.765240      |
| 3    | O  | 4.058250      | 1.913077      | 0.000000      |
| 4    | O  | 4.062340      | 1.917056      | 3.896635      |
| 5    | O  | 4.058250      | 0.000000      | 1.913077      |
| 6    | O  | 3.991237      | -0.020435     | 5.788495      |
| 7    | O  | 1.352750      | 1.913077      | 0.000000      |
| 8    | O  | 1.351908      | 1.911258      | 3.889705      |
| 9    | Ce | 0.000000      | 0.000000      | 0.000000      |
| 10   | Ce | -0.000393     | -0.001554     | 3.932290      |
| 11   | Ce | 2.705500      | 1.913077      | 1.913077      |
| 12   | Ce | 2.693754      | 1.911503      | 5.656832      |
| 13   | O  | 6.763750      | 0.000000      | 1.913077      |
| 14   | O  | 6.834704      | 0.065414      | 5.751289      |
| 15   | O  | 9.469250      | 1.913077      | 0.000000      |
| 16   | O  | 9.446003      | 1.908222      | 3.847340      |
| 17   | O  | 9.469250      | 0.000000      | 1.913077      |
| 18   | O  | 9.372349      | 0.092946      | 5.734101      |
| 19   | O  | 6.763750      | 1.913077      | 0.000000      |
| 20   | O  | 6.811959      | 1.914366      | 3.878822      |
| 21   | Ce | 5.411000      | 0.000000      | 0.000000      |

|    |    |           |          |           |
|----|----|-----------|----------|-----------|
| 22 | Ce | 5.413231  | 0.005913 | 3.947343  |
| 23 | Ce | 8.116500  | 1.913077 | 1.913077  |
| 24 | Zr | 8.146889  | 1.899965 | 5.467205  |
| 25 | O  | 1.352750  | 3.826155 | 1.913077  |
| 26 | O  | 1.408496  | 3.858753 | 5.763567  |
| 27 | O  | 4.058250  | 5.739232 | 0.000000  |
| 28 | O  | 4.002620  | 5.735458 | 3.752858  |
| 29 | O  | 4.058250  | 3.826155 | 1.913077  |
| 30 | O  | 4.000637  | 3.837524 | 5.811109  |
| 31 | O  | 1.352750  | 5.739232 | 0.000000  |
| 32 | O  | 1.410064  | 5.738585 | 3.737782  |
| 33 | Ce | 0.000000  | 3.826155 | 0.000000  |
| 34 | Ce | -0.012087 | 3.820995 | 3.945671  |
| 35 | Zr | 2.705500  | 5.739232 | 1.913077  |
| 36 | Ce | 2.698362  | 5.737701 | 5.595591  |
| 37 | O  | 6.763750  | 3.826155 | 1.913077  |
| 38 | O  | 6.834005  | 3.783946 | 5.742758  |
| 39 | O  | 9.469250  | 5.739232 | 0.000000  |
| 40 | O  | 9.473721  | 5.736476 | 3.911614  |
| 41 | O  | 9.469250  | 3.826155 | 1.913077  |
| 42 | O  | 9.365384  | 3.719132 | 5.744957  |
| 43 | O  | 6.763750  | 5.739232 | 0.000000  |
| 44 | O  | 6.758465  | 5.748744 | 3.898065  |
| 45 | Ce | 5.411000  | 3.826155 | 0.000000  |
| 46 | Ce | 5.420136  | 3.828779 | 3.947171  |
| 47 | Ce | 8.116500  | 5.739232 | 1.913077  |
| 48 | Ce | 8.106188  | 5.760312 | 5.660974  |
| 49 | N  | 8.471848  | 2.849486 | 8.951850  |
| 50 | O  | 9.655120  | 2.928872 | 9.136896  |
| 51 | O  | 7.767980  | 1.823190 | 7.931684  |
| 52 | C  | 7.298499  | 3.308151 | 9.319921  |
| 53 | C  | 6.514525  | 2.443635 | 8.402032  |
| 54 | H  | 7.142926  | 4.079088 | 10.074311 |
| 55 | H  | 5.877579  | 1.677898 | 8.874560  |
| 56 | H  | 6.008809  | 2.962700 | 7.570609  |

#### TS4-3

| X (Angstroms) | Y (Angstroms) | Z (Angstroms) |
|---------------|---------------|---------------|
| 1.352750000   | 0.000000000   | 1.913077397   |
| 1.400894513   | -0.030808446  | 5.767614327   |
| 4.058250000   | 1.913077397   | 0.000000000   |
| 4.060817498   | 1.917147002   | 3.890854521   |
| 4.058250000   | 0.000000000   | 1.913077397   |
| 3.984391959   | -0.020351345  | 5.788339473   |
| 1.352750000   | 1.913077397   | 0.000000000   |
| 1.354619566   | 1.910878967   | 3.881647599   |
| 0.000000000   | 0.000000000   | 0.000000000   |
| -0.020943726  | 0.007940088   | 3.944305978   |
| 2.705500000   | 1.913077397   | 1.913077397   |
| 2.700477982   | 1.908605159   | 5.654563580   |
| 6.763750000   | 0.000000000   | 1.913077397   |
| 6.809887239   | -0.057176606  | 5.667180924   |
| 9.469250000   | 1.913077397   | 0.000000000   |
| 9.448888389   | 1.906356435   | 3.851417916   |
| 9.469250000   | 0.000000000   | 1.913077397   |
| 9.352024921   | 0.086611826   | 5.744981727   |
| 6.763750000   | 1.913077397   | 0.000000000   |
| 6.801442055   | 1.918452057   | 3.904144920   |

|              |              |              |
|--------------|--------------|--------------|
| 5.41100000   | 0.00000000   | 0.00000000   |
| 5.412966640  | -0.016265882 | 3.927865911  |
| 8.116500000  | 1.913077397  | 1.913077397  |
| 8.107103465  | 1.906707009  | 5.539489788  |
| 1.352750000  | 3.826154793  | 1.913077397  |
| 1.403085546  | 3.851781599  | 5.757632336  |
| 4.058250000  | 5.739232190  | 0.000000000  |
| 3.999657802  | 5.731884250  | 3.745958412  |
| 4.058250000  | 3.826154793  | 1.913077397  |
| 3.994294507  | 3.839394678  | 5.817002376  |
| 1.352750000  | 5.739232190  | 0.000000000  |
| 1.411985664  | 5.739305388  | 3.731134342  |
| 0.000000000  | 3.826154793  | 0.000000000  |
| -0.024528648 | 3.816729586  | 3.940212488  |
| 2.705500000  | 5.739232190  | 1.913077397  |
| 2.691570267  | 5.737989368  | 5.591725720  |
| 6.763750000  | 3.826154793  | 1.913077397  |
| 6.806758472  | 3.810872639  | 5.760259044  |
| 9.469250000  | 5.739232190  | 0.000000000  |
| 9.479083222  | 5.744727157  | 3.895033852  |
| 9.469250000  | 3.826154793  | 1.913077397  |
| 9.338993881  | 3.731584342  | 5.720776513  |
| 6.763750000  | 5.739232190  | 0.000000000  |
| 6.765564424  | 5.710422625  | 3.853628314  |
| 5.411000000  | 3.826154793  | 0.000000000  |
| 5.423412929  | 3.826681546  | 3.950795981  |
| 8.116500000  | 5.739232190  | 1.913077397  |
| 8.104386155  | 5.741135409  | 5.683074604  |
| 8.668751440  | 3.272027857  | 9.185022171  |
| 8.532849131  | 4.509713043  | 8.838552622  |
| 7.562718020  | 1.743723476  | 7.630585194  |
| 7.255547660  | 3.208289026  | 9.352808999  |
| 6.584860662  | 2.396526800  | 8.369851135  |
| 6.728037794  | 3.850083464  | 10.067913920 |
| 5.817724949  | 1.686442217  | 8.799819164  |
| 5.957802524  | 3.117424486  | 7.771045202  |

CH<sub>2</sub>CHONO\*

| ATOM |    | X (Angstroms) | Y (Angstroms) | Z (Angstroms) |
|------|----|---------------|---------------|---------------|
| 1    | O  | 1.352750      | 0.000000      | 1.913077      |
| 2    | O  | 1.405836      | -0.035287     | 5.768770      |
| 3    | O  | 4.058250      | 1.913077      | 0.000000      |
| 4    | O  | 4.063400      | 1.915930      | 3.896928      |
| 5    | O  | 4.058250      | 0.000000      | 1.913077      |
| 6    | O  | 3.993501      | -0.019955     | 5.793627      |
| 7    | O  | 1.352750      | 1.913077      | 0.000000      |
| 8    | O  | 1.351074      | 1.911352      | 3.889170      |
| 9    | Ce | 0.000000      | 0.000000      | 0.000000      |
| 10   | Ce | -0.003791     | -0.003457     | 3.935993      |
| 11   | Ce | 2.705500      | 1.913077      | 1.913077      |
| 12   | Ce | 2.695291      | 1.911506      | 5.653887      |
| 13   | O  | 6.763750      | 0.000000      | 1.913077      |
| 14   | O  | 6.840067      | 0.071708      | 5.771445      |
| 15   | O  | 9.469250      | 1.913077      | 0.000000      |
| 16   | O  | 9.446597      | 1.904846      | 3.843207      |
| 17   | O  | 9.469250      | 0.000000      | 1.913077      |
| 18   | O  | 9.372511      | 0.102433      | 5.742599      |
| 19   | O  | 6.763750      | 1.913077      | 0.000000      |

|    |    |           |          |           |
|----|----|-----------|----------|-----------|
| 20 | O  | 6.814923  | 1.903924 | 3.869343  |
| 21 | Ce | 5.411000  | 0.000000 | 0.000000  |
| 22 | Ce | 5.419411  | 0.004097 | 3.953006  |
| 23 | Ce | 8.116500  | 1.913077 | 1.913077  |
| 24 | Zr | 8.151234  | 1.904803 | 5.457848  |
| 25 | O  | 1.352750  | 3.826155 | 1.913077  |
| 26 | O  | 1.408886  | 3.858678 | 5.765376  |
| 27 | O  | 4.058250  | 5.739232 | 0.000000  |
| 28 | O  | 4.003609  | 5.736991 | 3.753710  |
| 29 | O  | 4.058250  | 3.826155 | 1.913077  |
| 30 | O  | 4.002565  | 3.836703 | 5.820947  |
| 31 | O  | 1.352750  | 5.739232 | 0.000000  |
| 32 | O  | 1.411281  | 5.739460 | 3.737654  |
| 33 | Ce | 0.000000  | 3.826155 | 0.000000  |
| 34 | Ce | -0.011201 | 3.823193 | 3.941534  |
| 35 | Zr | 2.705500  | 5.739232 | 1.913077  |
| 36 | Ce | 2.700206  | 5.737614 | 5.594783  |
| 37 | O  | 6.763750  | 3.826155 | 1.913077  |
| 38 | O  | 6.830744  | 3.772491 | 5.707529  |
| 39 | O  | 9.469250  | 5.739232 | 0.000000  |
| 40 | O  | 9.471965  | 5.739658 | 3.919108  |
| 41 | O  | 9.469250  | 3.826155 | 1.913077  |
| 42 | O  | 9.371732  | 3.714103 | 5.728942  |
| 43 | O  | 6.763750  | 5.739232 | 0.000000  |
| 44 | O  | 6.760648  | 5.753079 | 3.906154  |
| 45 | Ce | 5.411000  | 3.826155 | 0.000000  |
| 46 | Ce | 5.421558  | 3.827569 | 3.942450  |
| 47 | Ce | 8.116500  | 5.739232 | 1.913077  |
| 48 | Ce | 8.105967  | 5.741964 | 5.679684  |
| 49 | N  | 8.478320  | 2.995924 | 8.918335  |
| 50 | O  | 8.002390  | 4.339786 | 8.572882  |
| 51 | O  | 7.769859  | 2.070460 | 7.932216  |
| 52 | C  | 7.154551  | 3.493907 | 9.316805  |
| 53 | C  | 6.450675  | 2.520328 | 8.401422  |
| 54 | H  | 6.897387  | 3.794689 | 10.336119 |
| 55 | H  | 5.952128  | 1.685225 | 8.911743  |
| 56 | H  | 5.850052  | 2.961676 | 7.590884  |

#### TS4-4

| X (Angstroms) | Y (Angstroms) | Z (Angstroms) |
|---------------|---------------|---------------|
| 1.352750000   | 0.000000000   | 1.913077397   |
| 1.403315461   | -0.041163359  | 5.760830373   |
| 4.058250000   | 1.913077397   | 0.000000000   |
| 4.064980052   | 1.916215295   | 3.891580099   |
| 4.058250000   | 0.000000000   | 1.913077397   |
| 3.988725614   | -0.016051546  | 5.782278430   |
| 1.352750000   | 1.913077397   | 0.000000000   |
| 1.349330679   | 1.910125137   | 3.886994018   |
| 0.000000000   | 0.000000000   | 0.000000000   |
| -0.004804742  | -0.007643085  | 3.935510668   |
| 2.705500000   | 1.913077397   | 1.913077397   |
| 2.691219847   | 1.909626436   | 5.652701289   |
| 6.763750000   | 0.000000000   | 1.913077397   |
| 6.837981708   | 0.058851091   | 5.744390966   |
| 9.469250000   | 1.913077397   | 0.000000000   |
| 9.448406310   | 1.904561867   | 3.838938706   |
| 9.469250000   | 0.000000000   | 1.913077397   |
| 9.369528905   | 0.116291888   | 5.738470534   |

|              |             |              |
|--------------|-------------|--------------|
| 6.763750000  | 1.913077397 | 0.000000000  |
| 6.822085429  | 1.913957027 | 3.878226340  |
| 5.411000000  | 0.000000000 | 0.000000000  |
| 5.419885445  | 0.002796332 | 3.950037463  |
| 8.116500000  | 1.913077397 | 1.913077397  |
| 8.172107403  | 1.891320922 | 5.459677022  |
| 1.352750000  | 3.826154793 | 1.913077397  |
| 1.407385869  | 3.863072496 | 5.755438299  |
| 4.058250000  | 5.739232190 | 0.000000000  |
| 4.003998680  | 5.733593646 | 3.755727644  |
| 4.058250000  | 3.826154793 | 1.913077397  |
| 4.000505401  | 3.823001167 | 5.804616470  |
| 1.352750000  | 5.739232190 | 0.000000000  |
| 1.412742213  | 5.738900328 | 3.735639101  |
| 0.000000000  | 3.826154793 | 0.000000000  |
| -0.011294411 | 3.827934394 | 3.939914453  |
| 2.705500000  | 5.739232190 | 1.913077397  |
| 2.701924371  | 5.736354085 | 5.603899320  |
| 6.763750000  | 3.826154793 | 1.913077397  |
| 6.842060130  | 3.789840397 | 5.735577820  |
| 9.469250000  | 5.739232190 | 0.000000000  |
| 9.466585938  | 5.739692937 | 3.928280415  |
| 9.469250000  | 3.826154793 | 1.913077397  |
| 9.364177038  | 3.702667491 | 5.728336180  |
| 6.763750000  | 5.739232190 | 0.000000000  |
| 6.759208752  | 5.743687428 | 3.903153915  |
| 5.411000000  | 3.826154793 | 0.000000000  |
| 5.420110414  | 3.828445429 | 3.939852448  |
| 8.116500000  | 5.739232190 | 1.913077397  |
| 8.088002227  | 5.740112168 | 5.689913145  |
| 8.111423450  | 2.881541685 | 8.953029057  |
| 6.538636528  | 4.712559372 | 9.308217940  |
| 7.595462075  | 1.801267730 | 8.111560607  |
| 6.851068274  | 3.426281096 | 9.048428934  |
| 6.227997033  | 2.330302960 | 8.200987806  |
| 6.273487159  | 3.522225034 | 10.072765160 |
| 5.662187117  | 1.529864571 | 8.688825753  |
| 5.772507629  | 2.700197695 | 7.267880335  |

**CH<sub>2</sub>COHNO\***

| ATOM |    | X (Angstroms) | Y (Angstroms) | Z (Angstroms) |
|------|----|---------------|---------------|---------------|
| 1    | O  | 1.352750      | 0.000000      | 1.913077      |
| 2    | O  | 1.399837      | -0.039407     | 5.764762      |
| 3    | O  | 4.058250      | 1.913077      | 0.000000      |
| 4    | O  | 4.066838      | 1.920731      | 3.896136      |
| 5    | O  | 4.058250      | 0.000000      | 1.913077      |
| 6    | O  | 3.986849      | -0.012240     | 5.798801      |
| 7    | O  | 1.352750      | 1.913077      | 0.000000      |
| 8    | O  | 1.348579      | 1.910656      | 3.886120      |
| 9    | Ce | 0.000000      | 0.000000      | 0.000000      |
| 10   | Ce | -0.007777     | -0.003046     | 3.932583      |
| 11   | Ce | 2.705500      | 1.913077      | 1.913077      |
| 12   | Ce | 2.686802      | 1.910569      | 5.649791      |
| 13   | O  | 6.763750      | 0.000000      | 1.913077      |
| 14   | O  | 6.826342      | 0.048427      | 5.755565      |
| 15   | O  | 9.469250      | 1.913077      | 0.000000      |
| 16   | O  | 9.452503      | 1.904946      | 3.834433      |
| 17   | O  | 9.469250      | 0.000000      | 1.913077      |



|    |    |           |          |          |
|----|----|-----------|----------|----------|
| 18 | O  | 9.366998  | 0.116153 | 5.733741 |
| 19 | O  | 6.763750  | 1.913077 | 0.000000 |
| 20 | O  | 6.819490  | 1.917325 | 3.887740 |
| 21 | Ce | 5.411000  | 0.000000 | 0.000000 |
| 22 | Ce | 5.419010  | 0.004221 | 3.953206 |
| 23 | Ce | 8.116500  | 1.913077 | 1.913077 |
| 24 | Zr | 8.167782  | 1.898073 | 5.467622 |
| 25 | O  | 1.352750  | 3.826155 | 1.913077 |
| 26 | O  | 1.404924  | 3.864500 | 5.760386 |
| 27 | O  | 4.058250  | 5.739232 | 0.000000 |
| 28 | O  | 4.004044  | 5.731609 | 3.762307 |
| 29 | O  | 4.058250  | 3.826155 | 1.913077 |
| 30 | O  | 3.997939  | 3.820864 | 5.837608 |
| 31 | O  | 1.352750  | 5.739232 | 0.000000 |
| 32 | O  | 1.411736  | 5.739225 | 3.734538 |
| 33 | Ce | 0.000000  | 3.826155 | 0.000000 |
| 34 | Ce | -0.013648 | 3.822566 | 3.935427 |
| 35 | Zr | 2.705500  | 5.739232 | 1.913077 |
| 36 | Ce | 2.693726  | 5.738386 | 5.594788 |
| 37 | O  | 6.763750  | 3.826155 | 1.913077 |
| 38 | O  | 6.823416  | 3.814485 | 5.739922 |
| 39 | O  | 9.469250  | 5.739232 | 0.000000 |
| 40 | O  | 9.469721  | 5.739207 | 3.917551 |
| 41 | O  | 9.469250  | 3.826155 | 1.913077 |
| 42 | O  | 9.362503  | 3.706533 | 5.720283 |
| 43 | O  | 6.763750  | 5.739232 | 0.000000 |
| 44 | O  | 6.760147  | 5.746806 | 3.889986 |
| 45 | Ce | 5.411000  | 3.826155 | 0.000000 |
| 46 | Ce | 5.422779  | 3.830831 | 3.943663 |
| 47 | Ce | 8.116500  | 5.739232 | 1.913077 |
| 48 | Ce | 8.094407  | 5.736799 | 5.669961 |
| 49 | N  | 7.978297  | 3.020073 | 8.776960 |
| 50 | O  | 6.197105  | 4.150647 | 9.818847 |
| 51 | O  | 7.619660  | 1.864202 | 7.875546 |
| 52 | C  | 6.716646  | 3.208346 | 9.015845 |
| 53 | C  | 6.190284  | 2.143775 | 8.131189 |
| 54 | H  | 5.220044  | 4.137447 | 9.721568 |
| 55 | H  | 5.696749  | 1.270289 | 8.579320 |
| 56 | H  | 5.683715  | 2.521228 | 7.228841 |

**HCHO\*+NCO\***

| ATOM |    | X (Angstroms) | Y (Angstroms) | Z (Angstroms) |
|------|----|---------------|---------------|---------------|
| 1    | O  | 1.352750      | 0.000000      | 1.913077      |
| 2    | O  | 1.445269      | -0.035450     | 5.755498      |
| 3    | O  | 4.058250      | 1.913077      | 0.000000      |
| 4    | O  | 4.077050      | 1.921324      | 3.873199      |
| 5    | O  | 4.058250      | 0.000000      | 1.913077      |
| 6    | O  | 4.027070      | -0.022244     | 5.749906      |
| 7    | O  | 1.352750      | 1.913077      | 0.000000      |
| 8    | O  | 1.369284      | 1.917378      | 3.887704      |
| 9    | Ce | 0.000000      | 0.000000      | 0.000000      |
| 10   | Ce | 0.022833      | -0.005742     | 3.902909      |
| 11   | Ce | 2.705500      | 1.913077      | 1.913077      |
| 12   | Ce | 2.708792      | 1.904288      | 5.651863      |
| 13   | O  | 6.763750      | 0.000000      | 1.913077      |
| 14   | O  | 6.872868      | 0.097465      | 5.684267      |
| 15   | O  | 9.469250      | 1.913077      | 0.000000      |
| 16   | O  | 9.472456      | 1.885253      | 3.837796      |

|    |    |           |           |          |
|----|----|-----------|-----------|----------|
| 17 | O  | 9.469250  | 0.000000  | 1.913077 |
| 18 | O  | 9.422577  | 0.111025  | 5.734542 |
| 19 | O  | 6.763750  | 1.913077  | 0.000000 |
| 20 | O  | 6.832767  | 1.974574  | 3.879623 |
| 21 | Ce | 5.411000  | 0.000000  | 0.000000 |
| 22 | Ce | 5.437567  | -0.000366 | 3.927669 |
| 23 | Ce | 8.116500  | 1.913077  | 1.913077 |
| 24 | Zr | 8.191709  | 1.852638  | 5.498840 |
| 25 | O  | 1.352750  | 3.826155  | 1.913077 |
| 26 | O  | 1.418944  | 3.860296  | 5.756010 |
| 27 | O  | 4.058250  | 5.739232  | 0.000000 |
| 28 | O  | 4.017793  | 5.729135  | 3.725000 |
| 29 | O  | 4.058250  | 3.826155  | 1.913077 |
| 30 | O  | 4.043184  | 3.839392  | 5.775293 |
| 31 | O  | 1.352750  | 5.739232  | 0.000000 |
| 32 | O  | 1.435022  | 5.736671  | 3.730454 |
| 33 | Ce | 0.000000  | 3.826155  | 0.000000 |
| 34 | Ce | -0.030964 | 3.836266  | 3.937888 |
| 35 | Zr | 2.705500  | 5.739232  | 1.913077 |
| 36 | Ce | 2.716558  | 5.735770  | 5.597885 |
| 37 | O  | 6.763750  | 3.826155  | 1.913077 |
| 38 | O  | 6.741093  | 3.619670  | 6.012069 |
| 39 | O  | 9.469250  | 5.739232  | 0.000000 |
| 40 | O  | 9.502452  | 5.776368  | 3.899003 |
| 41 | O  | 9.469250  | 3.826155  | 1.913077 |
| 42 | O  | 9.267895  | 3.747288  | 5.640775 |
| 43 | O  | 6.763750  | 5.739232  | 0.000000 |
| 44 | O  | 6.759848  | 5.682349  | 3.960146 |
| 45 | Ce | 5.411000  | 3.826155  | 0.000000 |
| 46 | Ce | 5.397213  | 3.830405  | 3.859469 |
| 47 | Ce | 8.116500  | 5.739232  | 1.913077 |
| 48 | Ce | 8.166523  | 5.854713  | 5.781068 |
| 49 | N  | 7.797162  | 5.941011  | 8.184028 |
| 50 | O  | 6.694028  | 4.447005  | 9.731488 |
| 51 | O  | 8.225975  | 1.629873  | 7.855306 |
| 52 | C  | 7.246925  | 5.179668  | 8.956850 |
| 53 | C  | 7.424734  | 0.974855  | 8.521853 |
| 54 | H  | 5.939856  | 3.580046  | 6.579688 |
| 55 | H  | 7.612276  | 0.824330  | 9.600463 |
| 56 | H  | 6.499473  | 0.570737  | 8.076968 |

**NCO\***

| ATOM |    | X (Angstroms) | Y (Angstroms) | Z (Angstroms) |
|------|----|---------------|---------------|---------------|
| 1    | O  | 1.352750      | 0.000000      | 1.913077      |
| 2    | O  | 1.445373      | -0.034261     | 5.757096      |
| 3    | O  | 4.058250      | 1.913077      | 0.000000      |
| 4    | O  | 4.076965      | 1.921320      | 3.878723      |
| 5    | O  | 4.058250      | 0.000000      | 1.913077      |
| 6    | O  | 4.022915      | -0.029512     | 5.741380      |
| 7    | O  | 1.352750      | 1.913077      | 0.000000      |
| 8    | O  | 1.364454      | 1.916388      | 3.892944      |
| 9    | Ce | 0.000000      | 0.000000      | 0.000000      |
| 10   | Ce | 0.021741      | -0.003857     | 3.917937      |
| 11   | Ce | 2.705500      | 1.913077      | 1.913077      |
| 12   | Ce | 2.710119      | 1.904923      | 5.654183      |
| 13   | O  | 6.763750      | 0.000000      | 1.913077      |
| 14   | O  | 6.879766      | 0.113064      | 5.716789      |
| 15   | O  | 9.469250      | 1.913077      | 0.000000      |

|    |    |           |           |           |
|----|----|-----------|-----------|-----------|
| 16 | O  | 9.462544  | 1.880736  | 3.818695  |
| 17 | O  | 9.469250  | 0.000000  | 1.913077  |
| 18 | O  | 9.422801  | 0.173940  | 5.785461  |
| 19 | O  | 6.763750  | 1.913077  | 0.000000  |
| 20 | O  | 6.829765  | 1.964045  | 3.866099  |
| 21 | Ce | 5.411000  | 0.000000  | 0.000000  |
| 22 | Ce | 5.440921  | -0.009747 | 3.945463  |
| 23 | Ce | 8.116500  | 1.913077  | 1.913077  |
| 24 | Zr | 8.187057  | 1.850688  | 5.451307  |
| 25 | O  | 1.352750  | 3.826155  | 1.913077  |
| 26 | O  | 1.437061  | 3.855470  | 5.759801  |
| 27 | O  | 4.058250  | 5.739232  | 0.000000  |
| 28 | O  | 4.013407  | 5.726807  | 3.728899  |
| 29 | O  | 4.058250  | 3.826155  | 1.913077  |
| 30 | O  | 4.065464  | 3.847151  | 5.783102  |
| 31 | O  | 1.352750  | 5.739232  | 0.000000  |
| 32 | O  | 1.430391  | 5.737201  | 3.739166  |
| 33 | Ce | 0.000000  | 3.826155  | 0.000000  |
| 34 | Ce | -0.029465 | 3.839483  | 3.944662  |
| 35 | Zr | 2.705500  | 5.739232  | 1.913077  |
| 36 | Ce | 2.720049  | 5.736942  | 5.601709  |
| 37 | O  | 6.763750  | 3.826155  | 1.913077  |
| 38 | O  | 6.770967  | 3.536468  | 6.067387  |
| 39 | O  | 9.469250  | 5.739232  | 0.000000  |
| 40 | O  | 9.504374  | 5.789316  | 3.935364  |
| 41 | O  | 9.469250  | 3.826155  | 1.913077  |
| 42 | O  | 9.281489  | 3.713073  | 5.642034  |
| 43 | O  | 6.763750  | 5.739232  | 0.000000  |
| 44 | O  | 6.748397  | 5.671631  | 3.993378  |
| 45 | Ce | 5.411000  | 3.826155  | 0.000000  |
| 46 | Ce | 5.391419  | 3.831248  | 3.867562  |
| 47 | Ce | 8.116500  | 5.739232  | 1.913077  |
| 48 | Ce | 8.170380  | 5.860695  | 5.836549  |
| 49 | N  | 8.085974  | 5.781805  | 8.169839  |
| 50 | O  | 7.902228  | 5.479112  | 10.555385 |
| 51 | C  | 7.992240  | 5.630365  | 9.370215  |
| 52 | H  | 5.941963  | 3.481712  | 6.594075  |

**NCO\*+NO\***

| ATOM |    | X (Angstroms) | Y (Angstroms) | Z (Angstroms) |
|------|----|---------------|---------------|---------------|
| 1    | O  | 1.352750      | 0.000000      | 1.913077      |
| 2    | O  | 1.430091      | -0.037365     | 5.761246      |
| 3    | O  | 4.058250      | 1.913077      | 0.000000      |
| 4    | O  | 4.074126      | 1.918080      | 3.874404      |
| 5    | O  | 4.058250      | 0.000000      | 1.913077      |
| 6    | O  | 4.015738      | -0.033220     | 5.742203      |
| 7    | O  | 1.352750      | 1.913077      | 0.000000      |
| 8    | O  | 1.359742      | 1.918318      | 3.891200      |
| 9    | Ce | 0.000000      | 0.000000      | 0.000000      |
| 10   | Ce | 0.031841      | 0.000935      | 3.905281      |
| 11   | Ce | 2.705500      | 1.913077      | 1.913077      |
| 12   | Ce | 2.707987      | 1.904024      | 5.657720      |
| 13   | O  | 6.763750      | 0.000000      | 1.913077      |
| 14   | O  | 6.871460      | 0.104511      | 5.723773      |
| 15   | O  | 9.469250      | 1.913077      | 0.000000      |
| 16   | O  | 9.458867      | 1.875283      | 3.836976      |
| 17   | O  | 9.469250      | 0.000000      | 1.913077      |
| 18   | O  | 9.401939      | 0.159780      | 5.827705      |

|    |    |           |           |           |
|----|----|-----------|-----------|-----------|
| 19 | O  | 6.763750  | 1.913077  | 0.000000  |
| 20 | O  | 6.823417  | 1.963757  | 3.871769  |
| 21 | Ce | 5.411000  | 0.000000  | 0.000000  |
| 22 | Ce | 5.421314  | -0.007953 | 3.928346  |
| 23 | Ce | 8.116500  | 1.913077  | 1.913077  |
| 24 | Zr | 8.168360  | 1.855507  | 5.455307  |
| 25 | O  | 1.352750  | 3.826155  | 1.913077  |
| 26 | O  | 1.418820  | 3.863844  | 5.763767  |
| 27 | O  | 4.058250  | 5.739232  | 0.000000  |
| 28 | O  | 4.010778  | 5.724141  | 3.728269  |
| 29 | O  | 4.058250  | 3.826155  | 1.913077  |
| 30 | O  | 4.061532  | 3.834054  | 5.793417  |
| 31 | O  | 1.352750  | 5.739232  | 0.000000  |
| 32 | O  | 1.424324  | 5.739150  | 3.736683  |
| 33 | Ce | 0.000000  | 3.826155  | 0.000000  |
| 34 | Ce | -0.029625 | 3.835293  | 3.941014  |
| 35 | Zr | 2.705500  | 5.739232  | 1.913077  |
| 36 | Ce | 2.713444  | 5.735397  | 5.598930  |
| 37 | O  | 6.763750  | 3.826155  | 1.913077  |
| 38 | O  | 6.756631  | 3.509146  | 6.122026  |
| 39 | O  | 9.469250  | 5.739232  | 0.000000  |
| 40 | O  | 9.497816  | 5.797791  | 3.938286  |
| 41 | O  | 9.469250  | 3.826155  | 1.913077  |
| 42 | O  | 9.253714  | 3.730275  | 5.654047  |
| 43 | O  | 6.763750  | 5.739232  | 0.000000  |
| 44 | O  | 6.755371  | 5.668620  | 3.999455  |
| 45 | Ce | 5.411000  | 3.826155  | 0.000000  |
| 46 | Ce | 5.387055  | 3.823861  | 3.855932  |
| 47 | Ce | 8.116500  | 5.739232  | 1.913077  |
| 48 | Ce | 8.168427  | 5.881301  | 5.780072  |
| 49 | N  | 7.926679  | 5.710983  | 8.334694  |
| 50 | O  | 6.627302  | 4.406434  | 9.895810  |
| 51 | C  | 7.254397  | 5.031658  | 9.096493  |
| 52 | H  | 5.865817  | 3.430703  | 6.538277  |
| 53 | N  | 9.186295  | 6.881896  | 9.494016  |
| 54 | O  | 9.181944  | 6.597463  | 10.611522 |

**TS4-5**

| X (Angstroms) | Y (Angstroms) | Z (Angstroms) |
|---------------|---------------|---------------|
| 1.352750000   | 0.000000000   | 1.913077397   |
| 1.431771106   | -0.038377893  | 5.754712823   |
| 4.058250000   | 1.913077397   | 0.000000000   |
| 4.074336754   | 1.915418627   | 3.871799909   |
| 4.058250000   | 0.000000000   | 1.913077397   |
| 4.019654981   | -0.035719240  | 5.738754828   |
| 1.352750000   | 1.913077397   | 0.000000000   |
| 1.358440375   | 1.918255576   | 3.888063997   |
| 0.000000000   | 0.000000000   | 0.000000000   |
| 0.034385985   | 0.001394002   | 3.900546107   |
| 2.705500000   | 1.913077397   | 1.913077397   |
| 2.706955079   | 1.903429608   | 5.653857251   |
| 6.763750000   | 0.000000000   | 1.913077397   |
| 6.875925615   | 0.102351843   | 5.732892242   |
| 9.469250000   | 1.913077397   | 0.000000000   |
| 9.459123013   | 1.876249776   | 3.836597678   |
| 9.469250000   | 0.000000000   | 1.913077397   |
| 9.404286113   | 0.159096391   | 5.821816992   |
| 6.763750000   | 1.913077397   | 0.000000000   |

|              |              |              |
|--------------|--------------|--------------|
| 6.825218314  | 1.965533863  | 3.881310119  |
| 5.411000000  | 0.000000000  | 0.000000000  |
| 5.418488615  | -0.007597157 | 3.926014223  |
| 8.116500000  | 1.913077397  | 1.913077397  |
| 8.177236026  | 1.856995756  | 5.452554857  |
| 1.352750000  | 3.826154793  | 1.913077397  |
| 1.422788976  | 3.862071409  | 5.759809230  |
| 4.058250000  | 5.739232190  | 0.000000000  |
| 4.009933906  | 5.724154340  | 3.726474892  |
| 4.058250000  | 3.826154793  | 1.913077397  |
| 4.066512244  | 3.834679795  | 5.780857673  |
| 1.352750000  | 5.739232190  | 0.000000000  |
| 1.422155554  | 5.738244106  | 3.735262762  |
| 0.000000000  | 3.826154793  | 0.000000000  |
| -0.024154943 | 3.835311698  | 3.933274494  |
| 2.705500000  | 5.739232190  | 1.913077397  |
| 2.711875853  | 5.735095250  | 5.596948530  |
| 6.763750000  | 3.826154793  | 1.913077397  |
| 6.778771645  | 3.543184085  | 6.127282782  |
| 9.469250000  | 5.739232190  | 0.000000000  |
| 9.494789203  | 5.798207041  | 3.930053724  |
| 9.469250000  | 3.826154793  | 1.913077397  |
| 9.262737768  | 3.735995882  | 5.649717030  |
| 6.763750000  | 5.739232190  | 0.000000000  |
| 6.757557312  | 5.674410015  | 3.995710173  |
| 5.411000000  | 3.826154793  | 0.000000000  |
| 5.381857691  | 3.824136905  | 3.854323916  |
| 8.116500000  | 5.739232190  | 1.913077397  |
| 8.168873714  | 5.881829627  | 5.750995617  |
| 7.883193313  | 5.721575108  | 8.499215995  |
| 6.132226236  | 4.343310775  | 9.474434769  |
| 7.025373404  | 5.035825602  | 9.179507412  |
| 5.910455087  | 3.467524242  | 6.583681911  |
| 8.608856857  | 6.351759455  | 9.491696939  |
| 8.134065583  | 5.955093136  | 10.601987132 |

**NNCO<sub>2</sub>\***

| ATOM |    | X (Angstroms) | Y (Angstroms) | Z (Angstroms) |
|------|----|---------------|---------------|---------------|
| 1    | O  | 1.352750      | 0.000000      | 1.913077      |
| 2    | O  | 1.432978      | -0.039127     | 5.750893      |
| 3    | O  | 4.058250      | 1.913077      | 0.000000      |
| 4    | O  | 4.075849      | 1.913203      | 3.869901      |
| 5    | O  | 4.058250      | 0.000000      | 1.913077      |
| 6    | O  | 4.020195      | -0.036834     | 5.735235      |
| 7    | O  | 1.352750      | 1.913077      | 0.000000      |
| 8    | O  | 1.357914      | 1.917748      | 3.885675      |
| 9    | Ce | 0.000000      | 0.000000      | 0.000000      |
| 10   | Ce | 0.029981      | 0.000700      | 3.897913      |
| 11   | Ce | 2.705500      | 1.913077      | 1.913077      |
| 12   | Ce | 2.710283      | 1.904736      | 5.654146      |
| 13   | O  | 6.763750      | 0.000000      | 1.913077      |
| 14   | O  | 6.873684      | 0.101710      | 5.744322      |
| 15   | O  | 9.469250      | 1.913077      | 0.000000      |
| 16   | O  | 9.459907      | 1.874611      | 3.840957      |
| 17   | O  | 9.469250      | 0.000000      | 1.913077      |
| 18   | O  | 9.402995      | 0.160288      | 5.831187      |
| 19   | O  | 6.763750      | 1.913077      | 0.000000      |
| 20   | O  | 6.825869      | 1.966384      | 3.888248      |

|    |    |           |           |           |
|----|----|-----------|-----------|-----------|
| 21 | Ce | 5.411000  | 0.000000  | 0.000000  |
| 22 | Ce | 5.420180  | -0.008605 | 3.925990  |
| 23 | Ce | 8.116500  | 1.913077  | 1.913077  |
| 24 | Zr | 8.178184  | 1.860800  | 5.461509  |
| 25 | O  | 1.352750  | 3.826155  | 1.913077  |
| 26 | O  | 1.425694  | 3.861182  | 5.756758  |
| 27 | O  | 4.058250  | 5.739232  | 0.000000  |
| 28 | O  | 4.008852  | 5.723297  | 3.724860  |
| 29 | O  | 4.058250  | 3.826155  | 1.913077  |
| 30 | O  | 4.066099  | 3.832094  | 5.767714  |
| 31 | O  | 1.352750  | 5.739232  | 0.000000  |
| 32 | O  | 1.421952  | 5.738328  | 3.734520  |
| 33 | Ce | 0.000000  | 3.826155  | 0.000000  |
| 34 | Ce | -0.026789 | 3.834370  | 3.931101  |
| 35 | Zr | 2.705500  | 5.739232  | 1.913077  |
| 36 | Ce | 2.715369  | 5.733855  | 5.598541  |
| 37 | O  | 6.763750  | 3.826155  | 1.913077  |
| 38 | O  | 6.787560  | 3.556492  | 6.124582  |
| 39 | O  | 9.469250  | 5.739232  | 0.000000  |
| 40 | O  | 9.487827  | 5.800429  | 3.932221  |
| 41 | O  | 9.469250  | 3.826155  | 1.913077  |
| 42 | O  | 9.270229  | 3.737180  | 5.654706  |
| 43 | O  | 6.763750  | 5.739232  | 0.000000  |
| 44 | O  | 6.757805  | 5.677294  | 3.997130  |
| 45 | Ce | 5.411000  | 3.826155  | 0.000000  |
| 46 | Ce | 5.387577  | 3.824456  | 3.857388  |
| 47 | Ce | 8.116500  | 5.739232  | 1.913077  |
| 48 | Ce | 8.164361  | 5.885126  | 5.759965  |
| 49 | N  | 7.788175  | 5.671671  | 8.453590  |
| 50 | O  | 5.861364  | 4.313092  | 9.164729  |
| 51 | C  | 6.823430  | 5.008424  | 9.299783  |
| 52 | H  | 5.939272  | 3.489322  | 6.618521  |
| 53 | N  | 8.375040  | 6.155893  | 9.498355  |
| 54 | O  | 7.440449  | 5.513996  | 10.459119 |

**TS4-6**

| X (Angstroms) | Y (Angstroms) | Z (Angstroms) |
|---------------|---------------|---------------|
| 1.352750000   | 0.000000000   | 1.913077397   |
| 1.432409903   | -0.038736018  | 5.753973837   |
| 4.058250000   | 1.913077397   | 0.000000000   |
| 4.074356091   | 1.912906837   | 3.868733215   |
| 4.058250000   | 0.000000000   | 1.913077397   |
| 4.022026225   | -0.037304147  | 5.738577039   |
| 1.352750000   | 1.913077397   | 0.000000000   |
| 1.359457086   | 1.918513027   | 3.886612765   |
| 0.000000000   | 0.000000000   | 0.000000000   |
| 0.039142254   | 0.003436711   | 3.899500068   |
| 2.705500000   | 1.913077397   | 1.913077397   |
| 2.709901963   | 1.903567227   | 5.653815183   |
| 6.763750000   | 0.000000000   | 1.913077397   |
| 6.877925019   | 0.097064033   | 5.748743470   |
| 9.469250000   | 1.913077397   | 0.000000000   |
| 9.459640192   | 1.876724307   | 3.837980794   |
| 9.469250000   | 0.000000000   | 1.913077397   |
| 9.405438260   | 0.159587331   | 5.827798915   |
| 6.763750000   | 1.913077397   | 0.000000000   |
| 6.826254683   | 1.964666485   | 3.887497602   |
| 5.411000000   | 0.000000000   | 0.000000000   |

|              |              |              |
|--------------|--------------|--------------|
| 5.415547124  | -0.006538538 | 3.924586833  |
| 8.116500000  | 1.913077397  | 1.913077397  |
| 8.178720334  | 1.860008274  | 5.454407575  |
| 1.352750000  | 3.826154793  | 1.913077397  |
| 1.424729744  | 3.861124267  | 5.760265468  |
| 4.058250000  | 5.739232190  | 0.000000000  |
| 4.010472705  | 5.726329514  | 3.723804996  |
| 4.058250000  | 3.826154793  | 1.913077397  |
| 4.067674653  | 3.835903258  | 5.770121748  |
| 1.352750000  | 5.739232190  | 0.000000000  |
| 1.421817569  | 5.737649424  | 3.734226960  |
| 0.000000000  | 3.826154793  | 0.000000000  |
| -0.018528966 | 3.834432000  | 3.931068917  |
| 2.705500000  | 5.739232190  | 1.913077397  |
| 2.715021171  | 5.733668323  | 5.596847181  |
| 6.763750000  | 3.826154793  | 1.913077397  |
| 6.793349660  | 3.558679546  | 6.137635816  |
| 9.469250000  | 5.739232190  | 0.000000000  |
| 9.492179728  | 5.798119593  | 3.928081433  |
| 9.469250000  | 3.826154793  | 1.913077397  |
| 9.269567478  | 3.737604176  | 5.656870308  |
| 6.763750000  | 5.739232190  | 0.000000000  |
| 6.756414588  | 5.678195995  | 3.988884673  |
| 5.411000000  | 3.826154793  | 0.000000000  |
| 5.376997176  | 3.823646430  | 3.853042043  |
| 8.116500000  | 5.739232190  | 1.913077397  |
| 8.169583355  | 5.878949632  | 5.724038253  |
| 7.882609902  | 5.672722157  | 8.482482261  |
| 5.866403468  | 4.362880924  | 9.178225834  |
| 6.831161535  | 5.020401618  | 9.416277440  |
| 5.929066754  | 3.485457712  | 6.604356143  |
| 8.509348427  | 6.134904410  | 9.411770016  |
| 7.310723658  | 5.454218795  | 10.568821496 |

**N<sub>2</sub>\*+CO<sub>2</sub>\***

| ATOM |    | X (Angstroms) | Y (Angstroms) | Z (Angstroms) |
|------|----|---------------|---------------|---------------|
| 1    | O  | 1.352750      | 0.000000      | 1.913077      |
| 2    | O  | 1.443161      | -0.040456     | 5.774099      |
| 3    | O  | 4.058250      | 1.913077      | 0.000000      |
| 4    | O  | 4.076734      | 1.913569      | 3.872118      |
| 5    | O  | 4.058250      | 0.000000      | 1.913077      |
| 6    | O  | 4.036568      | -0.035519     | 5.756494      |
| 7    | O  | 1.352750      | 1.913077      | 0.000000      |
| 8    | O  | 1.365932      | 1.919529      | 3.896428      |
| 9    | Ce | 0.000000      | 0.000000      | 0.000000      |
| 10   | Ce | 0.042247      | 0.006951      | 3.911123      |
| 11   | Ce | 2.705500      | 1.913077      | 1.913077      |
| 12   | Ce | 2.724342      | 1.902962      | 5.662120      |
| 13   | O  | 6.763750      | 0.000000      | 1.913077      |
| 14   | O  | 6.890802      | 0.078828      | 5.775705      |
| 15   | O  | 9.469250      | 1.913077      | 0.000000      |
| 16   | O  | 9.460921      | 1.880495      | 3.847739      |
| 17   | O  | 9.469250      | 0.000000      | 1.913077      |
| 18   | O  | 9.416433      | 0.160478      | 5.839228      |
| 19   | O  | 6.763750      | 1.913077      | 0.000000      |
| 20   | O  | 6.824394      | 1.971273      | 3.916897      |
| 21   | Ce | 5.411000      | 0.000000      | 0.000000      |
| 22   | Ce | 5.424542      | -0.004329     | 3.935162      |

|    |    |           |          |           |
|----|----|-----------|----------|-----------|
| 23 | Ce | 8.116500  | 1.913077 | 1.913077  |
| 24 | Zr | 8.185103  | 1.859485 | 5.474150  |
| 25 | O  | 1.352750  | 3.826155 | 1.913077  |
| 26 | O  | 1.446467  | 3.863011 | 5.779122  |
| 27 | O  | 4.058250  | 5.739232 | 0.000000  |
| 28 | O  | 4.017263  | 5.729123 | 3.725740  |
| 29 | O  | 4.058250  | 3.826155 | 1.913077  |
| 30 | O  | 4.111416  | 3.837049 | 5.790664  |
| 31 | O  | 1.352750  | 5.739232 | 0.000000  |
| 32 | O  | 1.428966  | 5.737314 | 3.741315  |
| 33 | Ce | 0.000000  | 3.826155 | 0.000000  |
| 34 | Ce | -0.009594 | 3.831037 | 3.937089  |
| 35 | Zr | 2.705500  | 5.739232 | 1.913077  |
| 36 | Ce | 2.728175  | 5.736141 | 5.601219  |
| 37 | O  | 6.763750  | 3.826155 | 1.913077  |
| 38 | O  | 6.844456  | 3.556551 | 6.265790  |
| 39 | O  | 9.469250  | 5.739232 | 0.000000  |
| 40 | O  | 9.495451  | 5.793585 | 3.943778  |
| 41 | O  | 9.469250  | 3.826155 | 1.913077  |
| 42 | O  | 9.285222  | 3.735425 | 5.680213  |
| 43 | O  | 6.763750  | 5.739232 | 0.000000  |
| 44 | O  | 6.767295  | 5.671307 | 3.995288  |
| 45 | Ce | 5.411000  | 3.826155 | 0.000000  |
| 46 | Ce | 5.373948  | 3.826017 | 3.835282  |
| 47 | Ce | 8.116500  | 5.739232 | 1.913077  |
| 48 | Ce | 8.173400  | 5.857892 | 5.722390  |
| 49 | N  | 9.582488  | 5.860246 | 8.465145  |
| 50 | O  | 5.247613  | 4.354411 | 9.641045  |
| 51 | C  | 6.075734  | 4.881312 | 10.287162 |
| 52 | H  | 5.898370  | 3.487424 | 6.546049  |
| 53 | N  | 10.246884 | 5.878477 | 9.350611  |
| 54 | O  | 6.902268  | 5.411698 | 10.934083 |

**C<sub>2</sub>H<sub>5</sub>COONO<sub>2</sub>\***

| ATOM |    | X (Angstroms) | Y (Angstroms) | Z (Angstroms) |
|------|----|---------------|---------------|---------------|
| 1    | O  | 1.352750      | 0.000000      | 1.913077      |
| 2    | O  | 1.415841      | -0.025710     | 5.766640      |
| 3    | O  | 4.058250      | 1.913077      | 0.000000      |
| 4    | O  | 4.067453      | 1.911690      | 3.893687      |
| 5    | O  | 4.058250      | 0.000000      | 1.913077      |
| 6    | O  | 4.002740      | -0.027857     | 5.777195      |
| 7    | O  | 1.352750      | 1.913077      | 0.000000      |
| 8    | O  | 1.351873      | 1.912422      | 3.886017      |
| 9    | Ce | 0.000000      | 0.000000      | 0.000000      |
| 10   | Ce | -0.011388     | -0.001460     | 3.942369      |
| 11   | Ce | 2.705500      | 1.913077      | 1.913077      |
| 12   | Ce | 2.701424      | 1.915693      | 5.647747      |
| 13   | O  | 6.763750      | 0.000000      | 1.913077      |
| 14   | O  | 6.856278      | 0.082371      | 5.786740      |
| 15   | O  | 9.469250      | 1.913077      | 0.000000      |
| 16   | O  | 9.435854      | 1.907122      | 3.846846      |
| 17   | O  | 9.469250      | 0.000000      | 1.913077      |
| 18   | O  | 9.384207      | 0.084295      | 5.741937      |
| 19   | O  | 6.763750      | 1.913077      | 0.000000      |
| 20   | O  | 6.806666      | 1.900160      | 3.860565      |
| 21   | Ce | 5.411000      | 0.000000      | 0.000000      |
| 22   | Ce | 5.424030      | -0.001600     | 3.954615      |
| 23   | Ce | 8.116500      | 1.913077      | 1.913077      |



|    |    |           |          |           |
|----|----|-----------|----------|-----------|
| 24 | Zr | 8.131314  | 1.921912 | 5.446252  |
| 25 | O  | 1.352750  | 3.826155 | 1.913077  |
| 26 | O  | 1.414305  | 3.854163 | 5.765509  |
| 27 | O  | 4.058250  | 5.739232 | 0.000000  |
| 28 | O  | 4.005264  | 5.735432 | 3.746567  |
| 29 | O  | 4.058250  | 3.826155 | 1.913077  |
| 30 | O  | 4.008073  | 3.850707 | 5.789959  |
| 31 | O  | 1.352750  | 5.739232 | 0.000000  |
| 32 | O  | 1.409231  | 5.739769 | 3.739643  |
| 33 | Ce | 0.000000  | 3.826155 | 0.000000  |
| 34 | Ce | -0.007148 | 3.827919 | 3.932363  |
| 35 | Zr | 2.705500  | 5.739232 | 1.913077  |
| 36 | Ce | 2.702031  | 5.737066 | 5.593837  |
| 37 | O  | 6.763750  | 3.826155 | 1.913077  |
| 38 | O  | 6.853604  | 3.717412 | 5.737104  |
| 39 | O  | 9.469250  | 5.739232 | 0.000000  |
| 40 | O  | 9.469723  | 5.745953 | 3.914408  |
| 41 | O  | 9.469250  | 3.826155 | 1.913077  |
| 42 | O  | 9.383847  | 3.729221 | 5.715648  |
| 43 | O  | 6.763750  | 5.739232 | 0.000000  |
| 44 | O  | 6.758219  | 5.748744 | 3.925696  |
| 45 | Ce | 5.411000  | 3.826155 | 0.000000  |
| 46 | Ce | 5.418843  | 3.827577 | 3.940024  |
| 47 | Ce | 8.116500  | 5.739232 | 1.913077  |
| 48 | Ce | 8.118183  | 5.744100 | 5.688995  |
| 49 | N  | 7.737425  | 3.257903 | 8.689315  |
| 50 | O  | 7.112283  | 3.065401 | 10.040194 |
| 51 | O  | 7.995772  | 2.231331 | 8.083736  |
| 52 | O  | 7.942754  | 4.419302 | 8.437119  |
| 53 | C  | 5.253656  | 1.784695 | 8.905165  |
| 54 | C  | 3.862437  | 1.240334 | 9.222289  |
| 55 | H  | 5.214975  | 2.601342 | 8.162605  |
| 56 | H  | 3.461340  | 0.716921 | 8.342348  |
| 57 | H  | 3.169811  | 2.039334 | 9.527886  |
| 58 | H  | 3.901618  | 0.510039 | 10.043942 |
| 59 | C  | 5.944707  | 2.260469 | 10.154012 |
| 60 | H  | 5.869521  | 1.000168 | 8.430985  |
| 61 | O  | 5.597217  | 2.079500 | 11.292700 |

#### TS5-1

| X (Angstroms) | Y (Angstroms) | Z (Angstroms) |
|---------------|---------------|---------------|
| 1.352750000   | 0.000000000   | 1.913077397   |
| 1.415806199   | -0.031958173  | 5.753570214   |
| 4.058250000   | 1.913077397   | 0.000000000   |
| 4.056478673   | 1.909408265   | 3.899984766   |
| 4.058250000   | 0.000000000   | 1.913077397   |
| 3.995506223   | -0.043250299  | 5.763122224   |
| 1.352750000   | 1.913077397   | 0.000000000   |
| 1.352048614   | 1.908820289   | 3.882335630   |
| 0.000000000   | 0.000000000   | 0.000000000   |
| -0.007683292  | -0.005391878  | 3.933761079   |
| 2.705500000   | 1.913077397   | 1.913077397   |
| 2.694504673   | 1.907146494   | 5.651277374   |
| 6.763750000   | 0.000000000   | 1.913077397   |
| 6.865809145   | 0.075260709   | 5.753184920   |
| 9.469250000   | 1.913077397   | 0.000000000   |
| 9.428944045   | 1.906066708   | 3.859500029   |
| 9.469250000   | 0.000000000   | 1.913077397   |

|              |              |              |
|--------------|--------------|--------------|
| 9.37855497   | 0.081285360  | 5.741563834  |
| 6.763750000  | 1.913077397  | 0.000000000  |
| 6.805175847  | 1.898479305  | 3.869472360  |
| 5.411000000  | 0.000000000  | 0.000000000  |
| 5.423973319  | -0.008896739 | 3.950033748  |
| 8.116500000  | 1.913077397  | 1.913077397  |
| 8.135726262  | 1.895352133  | 5.476981100  |
| 1.352750000  | 3.826154793  | 1.913077397  |
| 1.415023117  | 3.840925530  | 5.750930440  |
| 4.058250000  | 5.739232190  | 0.000000000  |
| 4.003504197  | 5.733206334  | 3.740679054  |
| 4.058250000  | 3.826154793  | 1.913077397  |
| 3.992694961  | 3.848006216  | 5.768908040  |
| 1.352750000  | 5.739232190  | 0.000000000  |
| 1.411794469  | 5.734549552  | 3.728337618  |
| 0.000000000  | 3.826154793  | 0.000000000  |
| -0.009116790 | 3.821591246  | 3.930554102  |
| 2.705500000  | 5.739232190  | 1.913077397  |
| 2.703117218  | 5.725910306  | 5.582849090  |
| 6.763750000  | 3.826154793  | 1.913077397  |
| 6.855541032  | 3.733628947  | 5.721241465  |
| 9.469250000  | 5.739232190  | 0.000000000  |
| 9.475202335  | 5.737222103  | 3.905665931  |
| 9.469250000  | 3.826154793  | 1.913077397  |
| 9.383787285  | 3.742801820  | 5.715756902  |
| 6.763750000  | 5.739232190  | 0.000000000  |
| 6.765466834  | 5.736125374  | 3.920806476  |
| 5.411000000  | 3.826154793  | 0.000000000  |
| 5.431989648  | 3.818458146  | 3.950717378  |
| 8.116500000  | 5.739232190  | 1.913077397  |
| 8.134066092  | 5.727836319  | 5.704231007  |
| 7.655026707  | 3.341107968  | 8.231584607  |
| 7.127922013  | 2.953814037  | 10.523057672 |
| 8.257484768  | 2.270614597  | 7.998405926  |
| 8.194651981  | 4.460711940  | 8.197965372  |
| 5.159252142  | 1.743543834  | 8.774220236  |
| 3.839535765  | 1.264485058  | 9.210595955  |
| 5.248813628  | 2.712869522  | 8.281847656  |
| 3.394661127  | 0.717594018  | 8.337659181  |
| 3.140950489  | 2.064587697  | 9.540392216  |
| 3.903084040  | 0.517371473  | 10.024675985 |
| 6.117028271  | 2.357827499  | 10.699854739 |
| 5.984727439  | 1.029933435  | 8.637232262  |
| 5.234360113  | 1.841460445  | 11.329776555 |

**CH<sub>3</sub>CH<sub>2</sub>NO<sub>2</sub>\*+CO<sub>2</sub>\***

| ATOM |    | X (Angstroms) | Y (Angstroms) | Z (Angstroms) |
|------|----|---------------|---------------|---------------|
| 1    | O  | 1.352750      | 0.000000      | 1.913077      |
| 2    | O  | 1.401002      | -0.034337     | 5.759227      |
| 3    | O  | 4.058250      | 1.913077      | 0.000000      |
| 4    | O  | 4.062466      | 1.913963      | 3.894842      |
| 5    | O  | 4.058250      | 0.000000      | 1.913077      |
| 6    | O  | 3.991750      | -0.012655     | 5.795869      |
| 7    | O  | 1.352750      | 1.913077      | 0.000000      |
| 8    | O  | 1.347390      | 1.911493      | 3.880783      |
| 9    | Ce | 0.000000      | 0.000000      | 0.000000      |
| 10   | Ce | -0.010209     | -0.001362     | 3.929468      |
| 11   | Ce | 2.705500      | 1.913077      | 1.913077      |

|    |    |           |          |           |
|----|----|-----------|----------|-----------|
| 12 | Ce | 2.681174  | 1.912636 | 5.646020  |
| 13 | O  | 6.763750  | 0.000000 | 1.913077  |
| 14 | O  | 6.830569  | 0.062498 | 5.776205  |
| 15 | O  | 9.469250  | 1.913077 | 0.000000  |
| 16 | O  | 9.444743  | 1.911933 | 3.848310  |
| 17 | O  | 9.469250  | 0.000000 | 1.913077  |
| 18 | O  | 9.366657  | 0.098706 | 5.727257  |
| 19 | O  | 6.763750  | 1.913077 | 0.000000  |
| 20 | O  | 6.815449  | 1.915630 | 3.889388  |
| 21 | Ce | 5.411000  | 0.000000 | 0.000000  |
| 22 | Ce | 5.416934  | 0.003898 | 3.950643  |
| 23 | Ce | 8.116500  | 1.913077 | 1.913077  |
| 24 | Zr | 8.157499  | 1.902651 | 5.474782  |
| 25 | O  | 1.352750  | 3.826155 | 1.913077  |
| 26 | O  | 1.404551  | 3.857584 | 5.761699  |
| 27 | O  | 4.058250  | 5.739232 | 0.000000  |
| 28 | O  | 4.004836  | 5.739916 | 3.754775  |
| 29 | O  | 4.058250  | 3.826155 | 1.913077  |
| 30 | O  | 3.994099  | 3.840061 | 5.800139  |
| 31 | O  | 1.352750  | 5.739232 | 0.000000  |
| 32 | O  | 1.411077  | 5.739228 | 3.736532  |
| 33 | Ce | 0.000000  | 3.826155 | 0.000000  |
| 34 | Ce | -0.011676 | 3.827182 | 3.930358  |
| 35 | Zr | 2.705500  | 5.739232 | 1.913077  |
| 36 | Ce | 2.694640  | 5.739880 | 5.596591  |
| 37 | O  | 6.763750  | 3.826155 | 1.913077  |
| 38 | O  | 6.826354  | 3.786323 | 5.773915  |
| 39 | O  | 9.469250  | 5.739232 | 0.000000  |
| 40 | O  | 9.469896  | 5.739699 | 3.905848  |
| 41 | O  | 9.469250  | 3.826155 | 1.913077  |
| 42 | O  | 9.365101  | 3.735251 | 5.718607  |
| 43 | O  | 6.763750  | 5.739232 | 0.000000  |
| 44 | O  | 6.757278  | 5.742147 | 3.906230  |
| 45 | Ce | 5.411000  | 3.826155 | 0.000000  |
| 46 | Ce | 5.417222  | 3.827153 | 3.948042  |
| 47 | Ce | 8.116500  | 5.739232 | 1.913077  |
| 48 | Ce | 8.106879  | 5.736331 | 5.668048  |
| 49 | N  | 7.134724  | 2.070457 | 8.715490  |
| 50 | O  | 7.511043  | 3.159705 | 13.200255 |
| 51 | O  | 8.108727  | 1.986338 | 7.930788  |
| 52 | O  | 7.277536  | 2.241839 | 9.922216  |
| 53 | C  | 5.764833  | 1.960016 | 8.124405  |
| 54 | C  | 4.676885  | 1.956224 | 9.173095  |
| 55 | H  | 5.705763  | 2.812866 | 7.416754  |
| 56 | H  | 3.706510  | 1.803644 | 8.675768  |
| 57 | H  | 4.626995  | 2.905856 | 9.725523  |
| 58 | H  | 4.805301  | 1.140982 | 9.900560  |
| 59 | C  | 6.506367  | 2.577273 | 13.021630 |
| 60 | H  | 5.794561  | 1.046019 | 7.500161  |
| 61 | O  | 5.495999  | 1.997418 | 12.859921 |

**CH<sub>3</sub>CH<sub>2</sub>NO<sub>2</sub>\***

| ATOM |   | X (Angstroms) | Y (Angstroms) | Z (Angstroms) |
|------|---|---------------|---------------|---------------|
| 1    | O | 1.352750      | 0.000000      | 1.913077      |
| 2    | O | 1.401093      | -0.034332     | 5.759286      |
| 3    | O | 4.058250      | 1.913077      | 0.000000      |
| 4    | O | 4.062477      | 1.913964      | 3.894833      |
| 5    | O | 4.058250      | 0.000000      | 1.913077      |

|    |    |           |           |          |
|----|----|-----------|-----------|----------|
| 6  | O  | 3.991838  | -0.012676 | 5.795814 |
| 7  | O  | 1.352750  | 1.913077  | 0.000000 |
| 8  | O  | 1.347391  | 1.911492  | 3.880828 |
| 9  | Ce | 0.000000  | 0.000000  | 0.000000 |
| 10 | Ce | -0.010204 | -0.001365 | 3.929441 |
| 11 | Ce | 2.705500  | 1.913077  | 1.913077 |
| 12 | Ce | 2.681197  | 1.912635  | 5.645994 |
| 13 | O  | 6.763750  | 0.000000  | 1.913077 |
| 14 | O  | 6.830549  | 0.062464  | 5.776029 |
| 15 | O  | 9.469250  | 1.913077  | 0.000000 |
| 16 | O  | 9.444775  | 1.911934  | 3.848271 |
| 17 | O  | 9.469250  | 0.000000  | 1.913077 |
| 18 | O  | 9.366725  | 0.098656  | 5.727068 |
| 19 | O  | 6.763750  | 1.913077  | 0.000000 |
| 20 | O  | 6.815377  | 1.915626  | 3.889388 |
| 21 | Ce | 5.411000  | 0.000000  | 0.000000 |
| 22 | Ce | 5.416939  | 0.003890  | 3.950601 |
| 23 | Ce | 8.116500  | 1.913077  | 1.913077 |
| 24 | Zr | 8.157331  | 1.902606  | 5.474718 |
| 25 | O  | 1.352750  | 3.826155  | 1.913077 |
| 26 | O  | 1.404512  | 3.857575  | 5.761560 |
| 27 | O  | 4.058250  | 5.739232  | 0.000000 |
| 28 | O  | 4.004873  | 5.739894  | 3.754811 |
| 29 | O  | 4.058250  | 3.826155  | 1.913077 |
| 30 | O  | 3.994131  | 3.840042  | 5.799965 |
| 31 | O  | 1.352750  | 5.739232  | 0.000000 |
| 32 | O  | 1.411090  | 5.739202  | 3.736513 |
| 33 | Ce | 0.000000  | 3.826155  | 0.000000 |
| 34 | Ce | -0.011668 | 3.827177  | 3.930361 |
| 35 | Zr | 2.705500  | 5.739232  | 1.913077 |
| 36 | Ce | 2.694669  | 5.739861  | 5.596542 |
| 37 | O  | 6.763750  | 3.826155  | 1.913077 |
| 38 | O  | 6.826337  | 3.786211  | 5.773752 |
| 39 | O  | 9.469250  | 5.739232  | 0.000000 |
| 40 | O  | 9.469894  | 5.739704  | 3.905850 |
| 41 | O  | 9.469250  | 3.826155  | 1.913077 |
| 42 | O  | 9.365123  | 3.735223  | 5.718536 |
| 43 | O  | 6.763750  | 5.739232  | 0.000000 |
| 44 | O  | 6.757267  | 5.742147  | 3.906164 |
| 45 | Ce | 5.411000  | 3.826155  | 0.000000 |
| 46 | Ce | 5.417218  | 3.827145  | 3.948037 |
| 47 | Ce | 8.116500  | 5.739232  | 1.913077 |
| 48 | Ce | 8.106889  | 5.736304  | 5.667956 |
| 49 | N  | 7.138170  | 2.064609  | 8.718638 |
| 50 | O  | 8.111106  | 1.983091  | 7.930367 |
| 51 | O  | 7.278442  | 2.227355  | 9.925008 |
| 52 | C  | 5.767259  | 1.960665  | 8.126616 |
| 53 | C  | 4.680828  | 1.952592  | 9.177163 |
| 54 | H  | 5.706811  | 2.817892  | 7.425384 |
| 55 | H  | 3.708991  | 1.804911  | 8.681611 |
| 56 | H  | 4.636648  | 2.899278  | 9.735133 |
| 57 | H  | 4.812569  | 1.130385  | 9.896742 |
| 58 | H  | 5.794695  | 1.051056  | 7.496163 |

**CH<sub>3</sub>CHNO<sub>2</sub>\***

| ATOM |   | X (Angstroms) | Y (Angstroms) | Z (Angstroms) |
|------|---|---------------|---------------|---------------|
| 1    | O | 1.352750      | 0.000000      | 1.913077      |
| 2    | O | 1.309861      | -0.048090     | 5.751567      |

|    |    |           |           |           |
|----|----|-----------|-----------|-----------|
| 3  | O  | 4.058250  | 1.913077  | 0.000000  |
| 4  | O  | 4.078144  | 1.919629  | 3.857037  |
| 5  | O  | 4.058250  | 0.000000  | 1.913077  |
| 6  | O  | 3.900741  | 0.048678  | 5.723100  |
| 7  | O  | 1.352750  | 1.913077  | 0.000000  |
| 8  | O  | 1.361450  | 1.914761  | 3.874346  |
| 9  | Ce | 0.000000  | 0.000000  | 0.000000  |
| 10 | Ce | -0.043903 | 0.022780  | 3.930246  |
| 11 | Ce | 2.705500  | 1.913077  | 1.913077  |
| 12 | Ce | 2.692278  | 1.929873  | 5.644710  |
| 13 | O  | 6.763750  | 0.000000  | 1.913077  |
| 14 | O  | 6.402308  | -0.607827 | 6.151790  |
| 15 | O  | 9.469250  | 1.913077  | 0.000000  |
| 16 | O  | 9.486799  | 1.991493  | 3.840746  |
| 17 | O  | 9.469250  | 0.000000  | 1.913077  |
| 18 | O  | 9.103349  | 0.106704  | 5.624670  |
| 19 | O  | 6.763750  | 1.913077  | 0.000000  |
| 20 | O  | 6.820082  | 1.782957  | 4.036776  |
| 21 | Ce | 5.411000  | 0.000000  | 0.000000  |
| 22 | Ce | 5.380415  | -0.028240 | 3.903486  |
| 23 | Ce | 8.116500  | 1.913077  | 1.913077  |
| 24 | Zr | 8.251059  | 2.124123  | 5.566598  |
| 25 | O  | 1.352750  | 3.826155  | 1.913077  |
| 26 | O  | 1.438697  | 3.883408  | 5.742378  |
| 27 | O  | 4.058250  | 5.739232  | 0.000000  |
| 28 | O  | 4.013208  | 5.739271  | 3.740926  |
| 29 | O  | 4.058250  | 3.826155  | 1.913077  |
| 30 | O  | 4.026616  | 3.843352  | 5.755411  |
| 31 | O  | 1.352750  | 5.739232  | 0.000000  |
| 32 | O  | 1.430642  | 5.753490  | 3.723280  |
| 33 | Ce | 0.000000  | 3.826155  | 0.000000  |
| 34 | Ce | 0.040160  | 3.838872  | 3.877474  |
| 35 | Zr | 2.705500  | 5.739232  | 1.913077  |
| 36 | Ce | 2.685511  | 5.752083  | 5.594404  |
| 37 | O  | 6.763750  | 3.826155  | 1.913077  |
| 38 | O  | 6.912795  | 3.818242  | 5.668718  |
| 39 | O  | 9.469250  | 5.739232  | 0.000000  |
| 40 | O  | 9.510685  | 5.710726  | 3.892161  |
| 41 | O  | 9.469250  | 3.826155  | 1.913077  |
| 42 | O  | 9.474292  | 3.743802  | 5.824362  |
| 43 | O  | 6.763750  | 5.739232  | 0.000000  |
| 44 | O  | 6.780723  | 5.767866  | 3.867823  |
| 45 | Ce | 5.411000  | 3.826155  | 0.000000  |
| 46 | Ce | 5.423112  | 3.819131  | 3.924994  |
| 47 | Ce | 8.116500  | 5.739232  | 1.913077  |
| 48 | Ce | 8.147736  | 5.685854  | 5.689022  |
| 49 | N  | 7.223133  | 2.357915  | 8.659219  |
| 50 | O  | 7.497242  | 1.583359  | 7.547727  |
| 51 | O  | 7.951232  | 2.193854  | 9.665615  |
| 52 | C  | 6.190693  | 3.189362  | 8.598661  |
| 53 | C  | 5.842238  | 3.997507  | 9.793465  |
| 54 | H  | 5.692106  | 3.279685  | 7.635802  |
| 55 | H  | 5.664982  | 3.357332  | 10.676492 |
| 56 | H  | 4.940622  | 4.594236  | 9.596361  |
| 57 | H  | 6.660822  | 4.684845  | 10.078135 |
| 58 | H  | 6.471058  | 0.094514  | 6.845814  |

| X (Angstroms) | Y (Angstroms) | Z (Angstroms) |
|---------------|---------------|---------------|
| 1.352750000   | 0.000000000   | 1.913077397   |
| 1.314286171   | -0.054842948  | 5.758404666   |
| 4.058250000   | 1.913077397   | 0.000000000   |
| 4.081824163   | 1.921744271   | 3.857802979   |
| 4.058250000   | 0.000000000   | 1.913077397   |
| 3.909483450   | 0.048769409   | 5.724870460   |
| 1.352750000   | 1.913077397   | 0.000000000   |
| 1.366592116   | 1.915395000   | 3.878267413   |
| 0.000000000   | 0.000000000   | 0.000000000   |
| -0.032497583  | 0.014571245   | 3.919826392   |
| 2.705500000   | 1.913077397   | 1.913077397   |
| 2.693516624   | 1.931034411   | 5.641507140   |
| 6.763750000   | 0.000000000   | 1.913077397   |
| 6.409665269   | -0.599593159  | 6.146375930   |
| 9.469250000   | 1.913077397   | 0.000000000   |
| 9.499644790   | 1.990298673   | 3.834260997   |
| 9.469250000   | 0.000000000   | 1.913077397   |
| 9.112675746   | 0.112862368   | 5.631227748   |
| 6.763750000   | 1.913077397   | 0.000000000   |
| 6.825727006   | 1.793799790   | 4.033214543   |
| 5.411000000   | 0.000000000   | 0.000000000   |
| 5.373475983   | -0.030210453  | 3.889473732   |
| 8.116500000   | 1.913077397   | 1.913077397   |
| 8.269235690   | 2.127892888   | 5.526600657   |
| 1.352750000   | 3.826154793   | 1.913077397   |
| 1.443178885   | 3.883148919   | 5.749142775   |
| 4.058250000   | 5.739232190   | 0.000000000   |
| 4.016302376   | 5.737383384   | 3.738783317   |
| 4.058250000   | 3.826154793   | 1.913077397   |
| 4.038736649   | 3.841320974   | 5.768796571   |
| 1.352750000   | 5.739232190   | 0.000000000   |
| 1.432797002   | 5.750440611   | 3.722491565   |
| 0.000000000   | 3.826154793   | 0.000000000   |
| 0.048967112   | 3.845518305   | 3.874140651   |
| 2.705500000   | 5.739232190   | 1.913077397   |
| 2.687866559   | 5.755975499   | 5.593450835   |
| 6.763750000   | 3.826154793   | 1.913077397   |
| 6.913258595   | 3.817153095   | 5.707709739   |
| 9.469250000   | 5.739232190   | 0.000000000   |
| 9.516133016   | 5.711870864   | 3.893805625   |
| 9.469250000   | 3.826154793   | 1.913077397   |
| 9.480047763   | 3.745505309   | 5.827074082   |
| 6.763750000   | 5.739232190   | 0.000000000   |
| 6.783578000   | 5.769347551   | 3.867416366   |
| 5.411000000   | 3.826154793   | 0.000000000   |
| 5.421759458   | 3.820454994   | 3.923092568   |
| 8.116500000   | 5.739232190   | 1.913077397   |
| 8.158768607   | 5.694591894   | 5.672564733   |
| 7.194739732   | 2.313841888   | 8.651631221   |
| 7.572711578   | 1.629211114   | 7.558388162   |
| 6.573176842   | 1.621395296   | 9.686625332   |
| 6.208437945   | 3.229657150   | 8.551642420   |
| 5.941700091   | 4.254860558   | 9.595949346   |
| 5.594503230   | 3.178820829   | 7.638350875   |
| 5.728301570   | 3.843402036   | 10.610176842  |
| 5.108640757   | 4.899716230   | 9.296853772   |
| 6.861142491   | 4.852556440   | 9.695495363   |

6.451307765 0.092130062 6.842864905

CH<sub>3</sub>CHONO\*

| ATOM |    | X (Angstroms) | Y (Angstroms) | Z (Angstroms) |
|------|----|---------------|---------------|---------------|
| 1    | O  | 1.352750      | 0.000000      | 1.913077      |
| 2    | O  | 1.310803      | -0.055026     | 5.754483      |
| 3    | O  | 4.058250      | 1.913077      | 0.000000      |
| 4    | O  | 4.077389      | 1.921072      | 3.858041      |
| 5    | O  | 4.058250      | 0.000000      | 1.913077      |
| 6    | O  | 3.899196      | 0.046377      | 5.710585      |
| 7    | O  | 1.352750      | 1.913077      | 0.000000      |
| 8    | O  | 1.365718      | 1.914850      | 3.879291      |
| 9    | Ce | 0.000000      | 0.000000      | 0.000000      |
| 10   | Ce | -0.041854     | 0.017817      | 3.926693      |
| 11   | Ce | 2.705500      | 1.913077      | 1.913077      |
| 12   | Ce | 2.694407      | 1.931620      | 5.648978      |
| 13   | O  | 6.763750      | 0.000000      | 1.913077      |
| 14   | O  | 6.397243      | -0.601672     | 6.131837      |
| 15   | O  | 9.469250      | 1.913077      | 0.000000      |
| 16   | O  | 9.491517      | 1.988137      | 3.837956      |
| 17   | O  | 9.469250      | 0.000000      | 1.913077      |
| 18   | O  | 9.111494      | 0.103535      | 5.625468      |
| 19   | O  | 6.763750      | 1.913077      | 0.000000      |
| 20   | O  | 6.820749      | 1.790782      | 4.032016      |
| 21   | Ce | 5.411000      | 0.000000      | 0.000000      |
| 22   | Ce | 5.374363      | -0.028627     | 3.897236      |
| 23   | Ce | 8.116500      | 1.913077      | 1.913077      |
| 24   | Zr | 8.247251      | 2.126336      | 5.569965      |
| 25   | O  | 1.352750      | 3.826155      | 1.913077      |
| 26   | O  | 1.438487      | 3.881984      | 5.745823      |
| 27   | O  | 4.058250      | 5.739232      | 0.000000      |
| 28   | O  | 4.012795      | 5.739155      | 3.736732      |
| 29   | O  | 4.058250      | 3.826155      | 1.913077      |
| 30   | O  | 4.023649      | 3.846963      | 5.745095      |
| 31   | O  | 1.352750      | 5.739232      | 0.000000      |
| 32   | O  | 1.430348      | 5.749833      | 3.721738      |
| 33   | Ce | 0.000000      | 3.826155      | 0.000000      |
| 34   | Ce | 0.038400      | 3.840355      | 3.879720      |
| 35   | Zr | 2.705500      | 5.739232      | 1.913077      |
| 36   | Ce | 2.684297      | 5.753169      | 5.594970      |
| 37   | O  | 6.763750      | 3.826155      | 1.913077      |
| 38   | O  | 6.911825      | 3.825340      | 5.680207      |
| 39   | O  | 9.469250      | 5.739232      | 0.000000      |
| 40   | O  | 9.511206      | 5.711476      | 3.892821      |
| 41   | O  | 9.469250      | 3.826155      | 1.913077      |
| 42   | O  | 9.473283      | 3.745817      | 5.823457      |
| 43   | O  | 6.763750      | 5.739232      | 0.000000      |
| 44   | O  | 6.779340      | 5.773094      | 3.861506      |
| 45   | Ce | 5.411000      | 3.826155      | 0.000000      |
| 46   | Ce | 5.423959      | 3.819652      | 3.929737      |
| 47   | Ce | 8.116500      | 5.739232      | 1.913077      |
| 48   | Ce | 8.146220      | 5.694508      | 5.684189      |
| 49   | N  | 7.243462      | 2.265315      | 8.669101      |
| 50   | O  | 7.515011      | 1.581567      | 7.538053      |
| 51   | O  | 5.844855      | 1.840558      | 9.217128      |
| 52   | C  | 6.049275      | 3.101012      | 8.599281      |
| 53   | C  | 6.023524      | 4.341615      | 9.458291      |
| 54   | H  | 5.620739      | 3.197273      | 7.594944      |

|    |   |          |          |           |
|----|---|----------|----------|-----------|
| 55 | H | 5.879415 | 4.069698 | 10.515005 |
| 56 | H | 5.221536 | 5.028306 | 9.147724  |
| 57 | H | 6.979984 | 4.885408 | 9.382063  |
| 58 | H | 6.414848 | 0.083406 | 6.844275  |

CH<sub>3</sub>CONO\*

| ATOM |    | X (Angstroms) | Y (Angstroms) | Z (Angstroms) |
|------|----|---------------|---------------|---------------|
| 1    | O  | 1.352750      | 0.000000      | 1.913077      |
| 2    | O  | 1.413685      | -0.025174     | 5.773552      |
| 3    | O  | 4.058250      | 1.913077      | 0.000000      |
| 4    | O  | 4.082517      | 1.925574      | 3.870641      |
| 5    | O  | 4.058250      | 0.000000      | 1.913077      |
| 6    | O  | 4.012657      | -0.072083     | 5.675108      |
| 7    | O  | 1.352750      | 1.913077      | 0.000000      |
| 8    | O  | 1.382909      | 1.909968      | 3.891361      |
| 9    | Ce | 0.000000      | 0.000000      | 0.000000      |
| 10   | Ce | 0.015497      | 0.015582      | 3.910874      |
| 11   | Ce | 2.705500      | 1.913077      | 1.913077      |
| 12   | Ce | 2.738107      | 1.899822      | 5.691723      |
| 13   | O  | 6.763750      | 0.000000      | 1.913077      |
| 14   | O  | 6.719734      | 0.119979      | 5.957227      |
| 15   | O  | 9.469250      | 1.913077      | 0.000000      |
| 16   | O  | 9.486402      | 1.913255      | 3.884631      |
| 17   | O  | 9.469250      | 0.000000      | 1.913077      |
| 18   | O  | 9.283183      | 0.068650      | 5.713503      |
| 19   | O  | 6.763750      | 1.913077      | 0.000000      |
| 20   | O  | 6.840540      | 1.924490      | 3.957620      |
| 21   | Ce | 5.411000      | 0.000000      | 0.000000      |
| 22   | Ce | 5.375896      | -0.002158     | 3.861860      |
| 23   | Ce | 8.116500      | 1.913077      | 1.913077      |
| 24   | Zr | 8.169773      | 1.902826      | 5.588400      |
| 25   | O  | 1.352750      | 3.826155      | 1.913077      |
| 26   | O  | 1.430138      | 3.845972      | 5.763307      |
| 27   | O  | 4.058250      | 5.739232      | 0.000000      |
| 28   | O  | 4.014947      | 5.724585      | 3.693755      |
| 29   | O  | 4.058250      | 3.826155      | 1.913077      |
| 30   | O  | 4.065973      | 3.885891      | 5.755870      |
| 31   | O  | 1.352750      | 5.739232      | 0.000000      |
| 32   | O  | 1.423554      | 5.739201      | 3.730762      |
| 33   | Ce | 0.000000      | 3.826155      | 0.000000      |
| 34   | Ce | 0.011311      | 3.809691      | 3.910612      |
| 35   | Zr | 2.705500      | 5.739232      | 1.913077      |
| 36   | Ce | 2.706123      | 5.733542      | 5.586212      |
| 37   | O  | 6.763750      | 3.826155      | 1.913077      |
| 38   | O  | 6.730836      | 3.729410      | 5.997274      |
| 39   | O  | 9.469250      | 5.739232      | 0.000000      |
| 40   | O  | 9.505263      | 5.740164      | 3.917956      |
| 41   | O  | 9.469250      | 3.826155      | 1.913077      |
| 42   | O  | 9.264384      | 3.763971      | 5.714324      |
| 43   | O  | 6.763750      | 5.739232      | 0.000000      |
| 44   | O  | 6.783191      | 5.743192      | 3.977550      |
| 45   | Ce | 5.411000      | 3.826155      | 0.000000      |
| 46   | Ce | 5.383602      | 3.832998      | 3.840597      |
| 47   | Ce | 8.116500      | 5.739232      | 1.913077      |
| 48   | Ce | 8.205214      | 5.744779      | 5.711396      |
| 49   | N  | 7.320183      | 2.311349      | 8.798540      |
| 50   | O  | 8.034301      | 1.846353      | 7.799346      |
| 51   | O  | 5.293551      | 1.648868      | 7.770494      |



|    |   |          |          |           |
|----|---|----------|----------|-----------|
| 52 | C | 5.946700 | 2.252158 | 8.674389  |
| 53 | C | 5.224164 | 2.953825 | 9.795187  |
| 54 | H | 5.860393 | 3.639728 | 6.455020  |
| 55 | H | 4.576465 | 2.240387 | 10.332701 |
| 56 | H | 4.566742 | 3.734207 | 9.376566  |
| 57 | H | 5.930093 | 3.408753 | 10.503293 |
| 58 | H | 6.099552 | 0.439860 | 6.670906  |

**TS5-3**

| X (Angstroms) | Y (Angstroms) | Z (Angstroms) |
|---------------|---------------|---------------|
| 1.352750000   | 0.000000000   | 1.913077397   |
| 1.415188683   | -0.028703221  | 5.774468122   |
| 4.058250000   | 1.913077397   | 0.000000000   |
| 4.097621504   | 1.923597061   | 3.885900204   |
| 4.058250000   | 0.000000000   | 1.913077397   |
| 3.980663178   | -0.090586211  | 5.645320046   |
| 1.352750000   | 1.913077397   | 0.000000000   |
| 1.378549417   | 1.913073021   | 3.899818682   |
| 0.000000000   | 0.000000000   | 0.000000000   |
| 0.037700649   | 0.025400620   | 3.919843536   |
| 2.705500000   | 1.913077397   | 1.913077397   |
| 2.786083036   | 1.899337658   | 5.768493450   |
| 6.763750000   | 0.000000000   | 1.913077397   |
| 6.661832312   | 0.152062636   | 5.952791639   |
| 9.469250000   | 1.913077397   | 0.000000000   |
| 9.467806910   | 1.890466367   | 3.889072427   |
| 9.469250000   | 0.000000000   | 1.913077397   |
| 9.263785439   | 0.112105946   | 5.801221677   |
| 6.763750000   | 1.913077397   | 0.000000000   |
| 6.845384712   | 1.919925123   | 3.960008724   |
| 5.411000000   | 0.000000000   | 0.000000000   |
| 5.374830713   | 0.011273893   | 3.917737854   |
| 8.116500000   | 1.913077397   | 1.913077397   |
| 8.151124561   | 1.918788294   | 5.557033417   |
| 1.352750000   | 3.826154793   | 1.913077397   |
| 1.434684737   | 3.850430234   | 5.773517603   |
| 4.058250000   | 5.739232190   | 0.000000000   |
| 4.021366084   | 5.724171769   | 3.692091053   |
| 4.058250000   | 3.826154793   | 1.913077397   |
| 4.070115350   | 3.906204898   | 5.727073736   |
| 1.352750000   | 5.739232190   | 0.000000000   |
| 1.415733224   | 5.738448235   | 3.731105989   |
| 0.000000000   | 3.826154793   | 0.000000000   |
| -0.001277260  | 3.799080056   | 3.955962599   |
| 2.705500000   | 5.739232190   | 1.913077397   |
| 2.701328115   | 5.732138796   | 5.588778246   |
| 6.763750000   | 3.826154793   | 1.913077397   |
| 6.743484275   | 3.758725711   | 5.958356694   |
| 9.469250000   | 5.739232190   | 0.000000000   |
| 9.494752545   | 5.771288520   | 3.959600609   |
| 9.469250000   | 3.826154793   | 1.913077397   |
| 9.254507540   | 3.740030419   | 5.733279887   |
| 6.763750000   | 5.739232190   | 0.000000000   |
| 6.788905748   | 5.762955074   | 3.991648498   |
| 5.411000000   | 3.826154793   | 0.000000000   |
| 5.375958345   | 3.843274179   | 3.850163848   |
| 8.116500000   | 5.739232190   | 1.913077397   |
| 8.165438051   | 5.823982795   | 5.727239192   |

|             |             |              |
|-------------|-------------|--------------|
| 6.439420078 | 2.473522556 | 8.619686990  |
| 7.056058681 | 1.566189174 | 7.768109641  |
| 4.284691705 | 1.779976718 | 7.861794875  |
| 5.091801205 | 2.462734171 | 8.606612989  |
| 4.451908447 | 3.442086849 | 9.601894110  |
| 5.983452616 | 3.680887159 | 6.575796142  |
| 3.796418978 | 2.893138787 | 10.305424398 |
| 3.800376210 | 4.140280380 | 9.051363636  |
| 5.184361872 | 4.021175352 | 10.181816272 |
| 6.471750279 | 0.775470203 | 6.975330396  |

**CH<sub>3</sub>CONOH\***

| ATOM |    | X (Angstroms) | Y (Angstroms) | Z (Angstroms) |
|------|----|---------------|---------------|---------------|
| 1    | O  | 1.352750      | 0.000000      | 1.913077      |
| 2    | O  | 1.435406      | -0.040535     | 5.753317      |
| 3    | O  | 4.058250      | 1.913077      | 0.000000      |
| 4    | O  | 4.072048      | 1.918470      | 3.886312      |
| 5    | O  | 4.058250      | 0.000000      | 1.913077      |
| 6    | O  | 4.044881      | -0.085555     | 5.679551      |
| 7    | O  | 1.352750      | 1.913077      | 0.000000      |
| 8    | O  | 1.349317      | 1.915897      | 3.892409      |
| 9    | Ce | 0.000000      | 0.000000      | 0.000000      |
| 10   | Ce | 0.021390      | 0.026096      | 3.935649      |
| 11   | Ce | 2.705500      | 1.913077      | 1.913077      |
| 12   | Ce | 2.736303      | 1.911049      | 5.737683      |
| 13   | O  | 6.763750      | 0.000000      | 1.913077      |
| 14   | O  | 6.882514      | -0.007416     | 5.681959      |
| 15   | O  | 9.469250      | 1.913077      | 0.000000      |
| 16   | O  | 9.435968      | 1.881801      | 3.870377      |
| 17   | O  | 9.469250      | 0.000000      | 1.913077      |
| 18   | O  | 9.396025      | 0.155728      | 5.838480      |
| 19   | O  | 6.763750      | 1.913077      | 0.000000      |
| 20   | O  | 6.824127      | 1.962769      | 3.921780      |
| 21   | Ce | 5.411000      | 0.000000      | 0.000000      |
| 22   | Ce | 5.379581      | -0.010271     | 3.886333      |
| 23   | Ce | 8.116500      | 1.913077      | 1.913077      |
| 24   | Zr | 8.142350      | 1.841221      | 5.510114      |
| 25   | O  | 1.352750      | 3.826155      | 1.913077      |
| 26   | O  | 1.415734      | 3.868470      | 5.759540      |
| 27   | O  | 4.058250      | 5.739232      | 0.000000      |
| 28   | O  | 4.015942      | 5.735401      | 3.679678      |
| 29   | O  | 4.058250      | 3.826155      | 1.913077      |
| 30   | O  | 4.056153      | 3.926829      | 5.703855      |
| 31   | O  | 1.352750      | 5.739232      | 0.000000      |
| 32   | O  | 1.416565      | 5.738697      | 3.722658      |
| 33   | Ce | 0.000000      | 3.826155      | 0.000000      |
| 34   | Ce | 0.004705      | 3.812398      | 3.943086      |
| 35   | Zr | 2.705500      | 5.739232      | 1.913077      |
| 36   | Ce | 2.714483      | 5.739976      | 5.584561      |
| 37   | O  | 6.763750      | 3.826155      | 1.913077      |
| 38   | O  | 6.771343      | 3.748716      | 5.973871      |
| 39   | O  | 9.469250      | 5.739232      | 0.000000      |
| 40   | O  | 9.498294      | 5.781760      | 3.945981      |
| 41   | O  | 9.469250      | 3.826155      | 1.913077      |
| 42   | O  | 9.282931      | 3.727470      | 5.693227      |
| 43   | O  | 6.763750      | 5.739232      | 0.000000      |
| 44   | O  | 6.784597      | 5.672476      | 3.924719      |
| 45   | Ce | 5.411000      | 3.826155      | 0.000000      |

|    |    |          |          |           |
|----|----|----------|----------|-----------|
| 46 | Ce | 5.387818 | 3.853820 | 3.854578  |
| 47 | Ce | 8.116500 | 5.739232 | 1.913077  |
| 48 | Ce | 8.171026 | 5.814306 | 5.696096  |
| 49 | N  | 5.867905 | 2.673809 | 8.534913  |
| 50 | O  | 6.408174 | 1.584258 | 7.785485  |
| 51 | O  | 3.779936 | 1.861595 | 7.897807  |
| 52 | C  | 4.545899 | 2.704143 | 8.528215  |
| 53 | C  | 3.924778 | 3.802526 | 9.345857  |
| 54 | H  | 6.122697 | 3.674748 | 6.710150  |
| 55 | H  | 3.283781 | 3.363182 | 10.128187 |
| 56 | H  | 3.274476 | 4.424103 | 8.710382  |
| 57 | H  | 4.692330 | 4.432739 | 9.815983  |
| 58 | H  | 5.641279 | 1.058701 | 7.414779  |

**TS5-4**

| X (Angstroms) | Y (Angstroms) | Z (Angstroms) |
|---------------|---------------|---------------|
| 1.352750000   | 0.000000000   | 1.913077397   |
| 1.445303007   | -0.037021544  | 5.758335231   |
| 4.058250000   | 1.913077397   | 0.000000000   |
| 4.078561838   | 1.917853856   | 3.873478696   |
| 4.058250000   | 0.000000000   | 1.913077397   |
| 4.041506652   | -0.078959682  | 5.688503437   |
| 1.352750000   | 1.913077397   | 0.000000000   |
| 1.369839669   | 1.917682915   | 3.882085749   |
| 0.000000000   | 0.000000000   | 0.000000000   |
| 0.038118804   | 0.018028632   | 3.916415669   |
| 2.705500000   | 1.913077397   | 1.913077397   |
| 2.728858164   | 1.901972119   | 5.713686237   |
| 6.763750000   | 0.000000000   | 1.913077397   |
| 6.890390442   | -0.005944289  | 5.662651301   |
| 9.469250000   | 1.913077397   | 0.000000000   |
| 9.461460179   | 1.880771513   | 3.865031646   |
| 9.469250000   | 0.000000000   | 1.913077397   |
| 9.414674318   | 0.080714248   | 5.773555050   |
| 6.763750000   | 1.913077397   | 0.000000000   |
| 6.833865492   | 1.954493338   | 3.927658551   |
| 5.411000000   | 0.000000000   | 0.000000000   |
| 5.421895609   | -0.007368832  | 3.916750490   |
| 8.116500000   | 1.913077397   | 1.913077397   |
| 8.103276407   | 1.813925177   | 5.620699857   |
| 1.352750000   | 3.826154793   | 1.913077397   |
| 1.414286411   | 3.869466772   | 5.762230092   |
| 4.058250000   | 5.739232190   | 0.000000000   |
| 4.009241667   | 5.735855893   | 3.683003228   |
| 4.058250000   | 3.826154793   | 1.913077397   |
| 4.038469978   | 3.905312870   | 5.708904556   |
| 1.352750000   | 5.739232190   | 0.000000000   |
| 1.425374185   | 5.738278258   | 3.720948098   |
| 0.000000000   | 3.826154793   | 0.000000000   |
| -0.005998547  | 3.808981298   | 3.939357762   |
| 2.705500000   | 5.739232190   | 1.913077397   |
| 2.712610471   | 5.740445791   | 5.585834490   |
| 6.763750000   | 3.826154793   | 1.913077397   |
| 6.732238285   | 3.737614467   | 5.932776339   |
| 9.469250000   | 5.739232190   | 0.000000000   |
| 9.489772675   | 5.771680635   | 3.889295344   |
| 9.469250000   | 3.826154793   | 1.913077397   |
| 9.274117319   | 3.771990460   | 5.659024085   |

|             |             |              |
|-------------|-------------|--------------|
| 6.763750000 | 5.739232190 | 0.000000000  |
| 6.782219043 | 5.670183239 | 3.906029466  |
| 5.411000000 | 3.826154793 | 0.000000000  |
| 5.371487214 | 3.816594448 | 3.876182691  |
| 8.116500000 | 5.739232190 | 1.913077397  |
| 8.174687671 | 5.811214035 | 5.665280653  |
| 5.504461852 | 3.055355862 | 8.596684965  |
| 7.570527565 | 1.768067221 | 7.700065962  |
| 3.447702990 | 1.892217028 | 7.991737253  |
| 4.311741503 | 2.593772525 | 8.648399317  |
| 3.801042596 | 3.122140118 | 10.084218193 |
| 6.134101314 | 3.637464256 | 6.698644800  |
| 3.491680223 | 2.224998598 | 10.642661430 |
| 2.926105049 | 3.768128771 | 9.891022436  |
| 4.586174238 | 3.663518400 | 10.636092720 |
| 6.678158747 | 1.390510268 | 7.898665633  |

**CH<sub>3</sub>NCO\***

| ATOM |    | X (Angstroms) | Y (Angstroms) | Z (Angstroms) |
|------|----|---------------|---------------|---------------|
| 1    | O  | 1.352750      | 0.000000      | 1.913077      |
| 2    | O  | 1.424593      | -0.034340     | 5.755053      |
| 3    | O  | 4.058250      | 1.913077      | 0.000000      |
| 4    | O  | 4.066280      | 1.921073      | 3.870456      |
| 5    | O  | 4.058250      | 0.000000      | 1.913077      |
| 6    | O  | 4.018683      | -0.065737     | 5.689101      |
| 7    | O  | 1.352750      | 1.913077      | 0.000000      |
| 8    | O  | 1.362622      | 1.920191      | 3.874246      |
| 9    | Ce | 0.000000      | 0.000000      | 0.000000      |
| 10   | Ce | 0.018821      | 0.021636      | 3.919058      |
| 11   | Ce | 2.705500      | 1.913077      | 1.913077      |
| 12   | Ce | 2.725313      | 1.917256      | 5.745525      |
| 13   | O  | 6.763750      | 0.000000      | 1.913077      |
| 14   | O  | 6.863391      | 0.012552      | 5.667753      |
| 15   | O  | 9.469250      | 1.913077      | 0.000000      |
| 16   | O  | 9.468811      | 1.886697      | 3.877891      |
| 17   | O  | 9.469250      | 0.000000      | 1.913077      |
| 18   | O  | 9.412703      | 0.034951      | 5.748024      |
| 19   | O  | 6.763750      | 1.913077      | 0.000000      |
| 20   | O  | 6.805106      | 1.964031      | 3.900934      |
| 21   | Ce | 5.411000      | 0.000000      | 0.000000      |
| 22   | Ce | 5.378779      | -0.000482     | 3.884439      |
| 23   | Ce | 8.116500      | 1.913077      | 1.913077      |
| 24   | Zr | 8.130871      | 1.806253      | 5.605463      |
| 25   | O  | 1.352750      | 3.826155      | 1.913077      |
| 26   | O  | 1.395919      | 3.879556      | 5.749442      |
| 27   | O  | 4.058250      | 5.739232      | 0.000000      |
| 28   | O  | 3.997540      | 5.739364      | 3.677577      |
| 29   | O  | 4.058250      | 3.826155      | 1.913077      |
| 30   | O  | 4.014364      | 3.913205      | 5.697074      |
| 31   | O  | 1.352750      | 5.739232      | 0.000000      |
| 32   | O  | 1.415885      | 5.741272      | 3.715280      |
| 33   | Ce | 0.000000      | 3.826155      | 0.000000      |
| 34   | Ce | -0.015395     | 3.816560      | 3.945812      |
| 35   | Zr | 2.705500      | 5.739232      | 1.913077      |
| 36   | Ce | 2.696490      | 5.737182      | 5.593177      |
| 37   | O  | 6.763750      | 3.826155      | 1.913077      |
| 38   | O  | 6.709683      | 3.721022      | 5.955872      |
| 39   | O  | 9.469250      | 5.739232      | 0.000000      |

|    |    |          |          |           |
|----|----|----------|----------|-----------|
| 40 | O  | 9.474870 | 5.777196 | 3.863294  |
| 41 | O  | 9.469250 | 3.826155 | 1.913077  |
| 42 | O  | 9.264459 | 3.836379 | 5.629724  |
| 43 | O  | 6.763750 | 5.739232 | 0.000000  |
| 44 | O  | 6.764406 | 5.681963 | 3.910317  |
| 45 | Ce | 5.411000 | 3.826155 | 0.000000  |
| 46 | Ce | 5.384441 | 3.842105 | 3.856085  |
| 47 | Ce | 8.116500 | 5.739232 | 1.913077  |
| 48 | Ce | 8.164223 | 5.814602 | 5.676521  |
| 49 | N  | 5.275184 | 2.945543 | 8.391954  |
| 50 | O  | 8.089486 | 1.843556 | 7.664183  |
| 51 | O  | 3.200445 | 2.019537 | 8.073895  |
| 52 | C  | 4.147046 | 2.489621 | 8.837903  |
| 53 | C  | 3.902690 | 2.489316 | 10.332507 |
| 54 | H  | 6.077531 | 3.628018 | 6.713207  |
| 55 | H  | 3.759315 | 1.449889 | 10.669081 |
| 56 | H  | 2.978071 | 3.048624 | 10.542405 |
| 57 | H  | 4.741795 | 2.940017 | 10.880520 |
| 58 | H  | 7.254490 | 2.172593 | 8.078402  |

**CH<sub>3</sub>COONO<sub>2</sub>\***

| ATOM |    | X (Angstroms) | Y (Angstroms) | Z (Angstroms) |
|------|----|---------------|---------------|---------------|
| 1    | O  | 1.352750      | 0.000000      | 1.913077      |
| 2    | O  | 1.412869      | -0.028734     | 5.769925      |
| 3    | O  | 4.058250      | 1.913077      | 0.000000      |
| 4    | O  | 4.065348      | 1.915984      | 3.895888      |
| 5    | O  | 4.058250      | 0.000000      | 1.913077      |
| 6    | O  | 4.002292      | -0.026741     | 5.775649      |
| 7    | O  | 1.352750      | 1.913077      | 0.000000      |
| 8    | O  | 1.349600      | 1.914218      | 3.887270      |
| 9    | Ce | 0.000000      | 0.000000      | 0.000000      |
| 10   | Ce | -0.007468     | -0.000421     | 3.939362      |
| 11   | Ce | 2.705500      | 1.913077      | 1.913077      |
| 12   | Ce | 2.694284      | 1.913380      | 5.650636      |
| 13   | O  | 6.763750      | 0.000000      | 1.913077      |
| 14   | O  | 6.857594      | 0.106363      | 5.788245      |
| 15   | O  | 9.469250      | 1.913077      | 0.000000      |
| 16   | O  | 9.438133      | 1.910214      | 3.847788      |
| 17   | O  | 9.469250      | 0.000000      | 1.913077      |
| 18   | O  | 9.382316      | 0.088996      | 5.743201      |
| 19   | O  | 6.763750      | 1.913077      | 0.000000      |
| 20   | O  | 6.807817      | 1.905043      | 3.862035      |
| 21   | Ce | 5.411000      | 0.000000      | 0.000000      |
| 22   | Ce | 5.419321      | 0.000254      | 3.953064      |
| 23   | Ce | 8.116500      | 1.913077      | 1.913077      |
| 24   | Zr | 8.135851      | 1.929073      | 5.447172      |
| 25   | O  | 1.352750      | 3.826155      | 1.913077      |
| 26   | O  | 1.417546      | 3.855045      | 5.766323      |
| 27   | O  | 4.058250      | 5.739232      | 0.000000      |
| 28   | O  | 4.006980      | 5.734807      | 3.747567      |
| 29   | O  | 4.058250      | 3.826155      | 1.913077      |
| 30   | O  | 4.007021      | 3.846639      | 5.789317      |
| 31   | O  | 1.352750      | 5.739232      | 0.000000      |
| 32   | O  | 1.412497      | 5.740865      | 3.741035      |
| 33   | Ce | 0.000000      | 3.826155      | 0.000000      |
| 34   | Ce | -0.005631     | 3.830261      | 3.932298      |
| 35   | Zr | 2.705500      | 5.739232      | 1.913077      |
| 36   | Ce | 2.702197      | 5.738209      | 5.597707      |

|    |    |          |          |           |
|----|----|----------|----------|-----------|
| 37 | O  | 6.763750 | 3.826155 | 1.913077  |
| 38 | O  | 6.849884 | 3.721162 | 5.755226  |
| 39 | O  | 9.469250 | 5.739232 | 0.000000  |
| 40 | O  | 9.470813 | 5.748272 | 3.906275  |
| 41 | O  | 9.469250 | 3.826155 | 1.913077  |
| 42 | O  | 9.386070 | 3.749885 | 5.703878  |
| 43 | O  | 6.763750 | 5.739232 | 0.000000  |
| 44 | O  | 6.760422 | 5.743723 | 3.932754  |
| 45 | Ce | 5.411000 | 3.826155 | 0.000000  |
| 46 | Ce | 5.418715 | 3.825156 | 3.946414  |
| 47 | Ce | 8.116500 | 5.739232 | 1.913077  |
| 48 | Ce | 8.131110 | 5.748330 | 5.685924  |
| 49 | N  | 7.710267 | 3.156471 | 8.671275  |
| 50 | O  | 6.913659 | 2.885621 | 9.892357  |
| 51 | O  | 8.054615 | 2.164242 | 8.045479  |
| 52 | O  | 7.946099 | 4.326823 | 8.504863  |
| 53 | C  | 5.789541 | 1.997094 | 9.788130  |
| 54 | C  | 5.259813 | 1.676520 | 8.428714  |
| 55 | O  | 5.345312 | 1.661149 | 10.853139 |
| 56 | H  | 4.268013 | 1.227674 | 8.572827  |
| 57 | H  | 5.883998 | 0.943268 | 7.888899  |
| 58 | H  | 5.198786 | 2.572309 | 7.786255  |

**TS6-1**

| X (Angstroms) | Y (Angstroms) | Z (Angstroms) |
|---------------|---------------|---------------|
| 1.352750000   | 0.000000000   | 1.913077397   |
| 1.423499195   | -0.022600349  | 5.765500758   |
| 4.058250000   | 1.913077397   | 0.000000000   |
| 4.065244779   | 1.913969311   | 3.907310869   |
| 4.058250000   | 0.000000000   | 1.913077397   |
| 4.003866657   | -0.036550172  | 5.757344669   |
| 1.352750000   | 1.913077397   | 0.000000000   |
| 1.361599464   | 1.913774812   | 3.898433170   |
| 0.000000000   | 0.000000000   | 0.000000000   |
| -0.001418211  | 0.005643462   | 3.941801691   |
| 2.705500000   | 1.913077397   | 1.913077397   |
| 2.714190203   | 1.911515472   | 5.669271917   |
| 6.763750000   | 0.000000000   | 1.913077397   |
| 6.863805342   | 0.076403784   | 5.744922301   |
| 9.469250000   | 1.913077397   | 0.000000000   |
| 9.434914830   | 1.914567794   | 3.863217341   |
| 9.469250000   | 0.000000000   | 1.913077397   |
| 9.379875138   | 0.092648824   | 5.745846840   |
| 6.763750000   | 1.913077397   | 0.000000000   |
| 6.810153724   | 1.912523309   | 3.868476825   |
| 5.411000000   | 0.000000000   | 0.000000000   |
| 5.422866649   | -0.001680289  | 3.937654134   |
| 8.116500000   | 1.913077397   | 1.913077397   |
| 8.144874668   | 1.904892041   | 5.467912972   |
| 1.352750000   | 3.826154793   | 1.913077397   |
| 1.423681144   | 3.851911045   | 5.763525507   |
| 4.058250000   | 5.739232190   | 0.000000000   |
| 4.006180884   | 5.738963520   | 3.743120203   |
| 4.058250000   | 3.826154793   | 1.913077397   |
| 4.005308583   | 3.862920267   | 5.766935061   |
| 1.352750000   | 5.739232190   | 0.000000000   |
| 1.415574806   | 5.740578722   | 3.739571418   |
| 0.000000000   | 3.826154793   | 0.000000000   |

|              |             |              |
|--------------|-------------|--------------|
| -0.002740403 | 3.827752726 | 3.941184721  |
| 2.705500000  | 5.739232190 | 1.913077397  |
| 2.701781750  | 5.738435614 | 5.595383448  |
| 6.763750000  | 3.826154793 | 1.913077397  |
| 6.862855807  | 3.741448503 | 5.736501697  |
| 9.469250000  | 5.739232190 | 0.000000000  |
| 9.475298846  | 5.746066370 | 3.914826377  |
| 9.469250000  | 3.826154793 | 1.913077397  |
| 9.381384802  | 3.749566400 | 5.729710268  |
| 6.763750000  | 5.739232190 | 0.000000000  |
| 6.765147014  | 5.742061902 | 3.918707219  |
| 5.411000000  | 3.826154793 | 0.000000000  |
| 5.429844119  | 3.828821721 | 3.946244814  |
| 8.116500000  | 5.739232190 | 1.913077397  |
| 8.129557427  | 5.741910310 | 5.695802201  |
| 7.645690161  | 3.174011814 | 8.294907994  |
| 6.925644909  | 2.622296765 | 10.481609796 |
| 8.305172387  | 2.149603980 | 8.030048380  |
| 8.103789747  | 4.310948272 | 8.437082179  |
| 5.901120745  | 2.006147849 | 10.353988634 |
| 5.186127815  | 1.688048517 | 8.361159387  |
| 4.964860783  | 1.417016788 | 10.862311774 |
| 4.227878892  | 1.315760440 | 8.729132639  |
| 5.947117470  | 0.958045737 | 8.071584616  |
| 5.234503150  | 2.679989133 | 7.907981417  |

**CH<sub>3</sub>NO<sub>2</sub>\*+CO<sub>2</sub>\***

| ATOM |    | X (Angstroms) | Y (Angstroms) | Z (Angstroms) |
|------|----|---------------|---------------|---------------|
| 1    | O  | 1.352750      | 0.000000      | 1.913077      |
| 2    | O  | 1.407771      | -0.045543     | 5.761852      |
| 3    | O  | 4.058250      | 1.913077      | 0.000000      |
| 4    | O  | 4.062391      | 1.921582      | 3.897354      |
| 5    | O  | 4.058250      | 0.000000      | 1.913077      |
| 6    | O  | 3.998510      | -0.003761     | 5.801074      |
| 7    | O  | 1.352750      | 1.913077      | 0.000000      |
| 8    | O  | 1.356875      | 1.909280      | 3.885710      |
| 9    | Ce | 0.000000      | 0.000000      | 0.000000      |
| 10   | Ce | -0.000383     | -0.006285     | 3.926306      |
| 11   | Ce | 2.705500      | 1.913077      | 1.913077      |
| 12   | Ce | 2.683881      | 1.912512      | 5.653198      |
| 13   | O  | 6.763750      | 0.000000      | 1.913077      |
| 14   | O  | 6.833195      | 0.055772      | 5.768236      |
| 15   | O  | 9.469250      | 1.913077      | 0.000000      |
| 16   | O  | 9.455441      | 1.907056      | 3.840023      |
| 17   | O  | 9.469250      | 0.000000      | 1.913077      |
| 18   | O  | 9.369112      | 0.099353      | 5.721844      |
| 19   | O  | 6.763750      | 1.913077      | 0.000000      |
| 20   | O  | 6.819118      | 1.919909      | 3.888684      |
| 21   | Ce | 5.411000      | 0.000000      | 0.000000      |
| 22   | Ce | 5.419792      | 0.006396      | 3.946802      |
| 23   | Ce | 8.116500      | 1.913077      | 1.913077      |
| 24   | Zr | 8.168920      | 1.901734      | 5.469064      |
| 25   | O  | 1.352750      | 3.826155      | 1.913077      |
| 26   | O  | 1.407324      | 3.855092      | 5.757586      |
| 27   | O  | 4.058250      | 5.739232      | 0.000000      |
| 28   | O  | 4.008082      | 5.742216      | 3.757496      |
| 29   | O  | 4.058250      | 3.826155      | 1.913077      |
| 30   | O  | 3.998221      | 3.844522      | 5.802112      |

|    |    |           |          |           |
|----|----|-----------|----------|-----------|
| 31 | O  | 1.352750  | 5.739232 | 0.000000  |
| 32 | O  | 1.418124  | 5.736381 | 3.734350  |
| 33 | Ce | 0.000000  | 3.826155 | 0.000000  |
| 34 | Ce | -0.004673 | 3.823393 | 3.930461  |
| 35 | Zr | 2.705500  | 5.739232 | 1.913077  |
| 36 | Ce | 2.701353  | 5.737581 | 5.600825  |
| 37 | O  | 6.763750  | 3.826155 | 1.913077  |
| 38 | O  | 6.828949  | 3.793520 | 5.772040  |
| 39 | O  | 9.469250  | 5.739232 | 0.000000  |
| 40 | O  | 9.477675  | 5.739976 | 3.911682  |
| 41 | O  | 9.469250  | 3.826155 | 1.913077  |
| 42 | O  | 9.367564  | 3.721334 | 5.718112  |
| 43 | O  | 6.763750  | 5.739232 | 0.000000  |
| 44 | O  | 6.755709  | 5.744232 | 3.903293  |
| 45 | Ce | 5.411000  | 3.826155 | 0.000000  |
| 46 | Ce | 5.416584  | 3.828336 | 3.945555  |
| 47 | Ce | 8.116500  | 5.739232 | 1.913077  |
| 48 | Ce | 8.103995  | 5.738112 | 5.668061  |
| 49 | N  | 7.094072  | 1.956191 | 8.693875  |
| 50 | O  | 7.440497  | 2.329120 | 13.245742 |
| 51 | O  | 8.087560  | 1.923258 | 7.929780  |
| 52 | O  | 7.202867  | 2.009469 | 9.915439  |
| 53 | C  | 6.490111  | 1.664383 | 13.059983 |
| 54 | C  | 5.750692  | 1.931155 | 8.072376  |
| 55 | O  | 5.535232  | 0.999184 | 12.891361 |
| 56 | H  | 5.011463  | 1.929461 | 8.880047  |
| 57 | H  | 5.702584  | 1.031223 | 7.431718  |
| 58 | H  | 5.681852  | 2.821583 | 7.419193  |

**CH<sub>3</sub>NO<sub>2</sub>\***

| ATOM |    | X (Angstroms) | Y (Angstroms) | Z (Angstroms) |
|------|----|---------------|---------------|---------------|
| 1    | O  | 1.352750      | 0.000000      | 1.913077      |
| 2    | O  | 1.407773      | -0.045474     | 5.761824      |
| 3    | O  | 4.058250      | 1.913077      | 0.000000      |
| 4    | O  | 4.062385      | 1.921567      | 3.897308      |
| 5    | O  | 4.058250      | 0.000000      | 1.913077      |
| 6    | O  | 3.998500      | -0.003775     | 5.800967      |
| 7    | O  | 1.352750      | 1.913077      | 0.000000      |
| 8    | O  | 1.356873      | 1.909276      | 3.885741      |
| 9    | Ce | 0.000000      | 0.000000      | 0.000000      |
| 10   | Ce | -0.000381     | -0.006281     | 3.926333      |
| 11   | Ce | 2.705500      | 1.913077      | 1.913077      |
| 12   | Ce | 2.683890      | 1.912511      | 5.653181      |
| 13   | O  | 6.763750      | 0.000000      | 1.913077      |
| 14   | O  | 6.833041      | 0.055793      | 5.768205      |
| 15   | O  | 9.469250      | 1.913077      | 0.000000      |
| 16   | O  | 9.455355      | 1.907152      | 3.840140      |
| 17   | O  | 9.469250      | 0.000000      | 1.913077      |
| 18   | O  | 9.369162      | 0.099480      | 5.721875      |
| 19   | O  | 6.763750      | 1.913077      | 0.000000      |
| 20   | O  | 6.819152      | 1.919901      | 3.888694      |
| 21   | Ce | 5.411000      | 0.000000      | 0.000000      |
| 22   | Ce | 5.419791      | 0.006400      | 3.946788      |
| 23   | Ce | 8.116500      | 1.913077      | 1.913077      |
| 24   | Zr | 8.168917      | 1.902092      | 5.469020      |
| 25   | O  | 1.352750      | 3.826155      | 1.913077      |
| 26   | O  | 1.407386      | 3.855118      | 5.757757      |
| 27   | O  | 4.058250      | 5.739232      | 0.000000      |



|    |    |           |          |          |
|----|----|-----------|----------|----------|
| 28 | O  | 4.008068  | 5.742248 | 3.757470 |
| 29 | O  | 4.058250  | 3.826155 | 1.913077 |
| 30 | O  | 3.998211  | 3.844485 | 5.802182 |
| 31 | O  | 1.352750  | 5.739232 | 0.000000 |
| 32 | O  | 1.418140  | 5.736369 | 3.734438 |
| 33 | Ce | 0.000000  | 3.826155 | 0.000000 |
| 34 | Ce | -0.004693 | 3.823402 | 3.930468 |
| 35 | Zr | 2.705500  | 5.739232 | 1.913077 |
| 36 | Ce | 2.701367  | 5.737608 | 5.600783 |
| 37 | O  | 6.763750  | 3.826155 | 1.913077 |
| 38 | O  | 6.829038  | 3.793489 | 5.771943 |
| 39 | O  | 9.469250  | 5.739232 | 0.000000 |
| 40 | O  | 9.477673  | 5.739969 | 3.911578 |
| 41 | O  | 9.469250  | 3.826155 | 1.913077 |
| 42 | O  | 9.367642  | 3.721393 | 5.718034 |
| 43 | O  | 6.763750  | 5.739232 | 0.000000 |
| 44 | O  | 6.755743  | 5.744228 | 3.903209 |
| 45 | Ce | 5.411000  | 3.826155 | 0.000000 |
| 46 | Ce | 5.416608  | 3.828338 | 3.945559 |
| 47 | Ce | 8.116500  | 5.739232 | 1.913077 |
| 48 | Ce | 8.104029  | 5.738085 | 5.667897 |
| 49 | N  | 7.093361  | 1.957612 | 8.693536 |
| 50 | O  | 8.088270  | 1.923693 | 7.929092 |
| 51 | O  | 7.199432  | 2.009464 | 9.913585 |
| 52 | C  | 5.750184  | 1.936618 | 8.070833 |
| 53 | H  | 5.011176  | 1.936863 | 8.878478 |
| 54 | H  | 5.699375  | 1.037480 | 7.429487 |
| 55 | H  | 5.683317  | 2.827736 | 7.418487 |

**CH<sub>2</sub>NO<sub>2</sub>\***

| ATOM |    | X (Angstroms) | Y (Angstroms) | Z (Angstroms) |
|------|----|---------------|---------------|---------------|
| 1    | O  | 1.352750      | 0.000000      | 1.913077      |
| 2    | O  | 1.434879      | -0.031973     | 5.760847      |
| 3    | O  | 4.058250      | 1.913077      | 0.000000      |
| 4    | O  | 4.070733      | 1.929412      | 3.872921      |
| 5    | O  | 4.058250      | 0.000000      | 1.913077      |
| 6    | O  | 4.013331      | -0.018763     | 5.752970      |
| 7    | O  | 1.352750      | 1.913077      | 0.000000      |
| 8    | O  | 1.366299      | 1.906775      | 3.877513      |
| 9    | Ce | 0.000000      | 0.000000      | 0.000000      |
| 10   | Ce | -0.000561     | -0.001667     | 3.908306      |
| 11   | Ce | 2.705500      | 1.913077      | 1.913077      |
| 12   | Ce | 2.694091      | 1.910305      | 5.653114      |
| 13   | O  | 6.763750      | 0.000000      | 1.913077      |
| 14   | O  | 6.865813      | 0.058990      | 5.762852      |
| 15   | O  | 9.469250      | 1.913077      | 0.000000      |
| 16   | O  | 9.453189      | 1.862165      | 3.866524      |
| 17   | O  | 9.469250      | 0.000000      | 1.913077      |
| 18   | O  | 9.405464      | 0.093927      | 5.799179      |
| 19   | O  | 6.763750      | 1.913077      | 0.000000      |
| 20   | O  | 6.824412      | 1.941098      | 3.911867      |
| 21   | Ce | 5.411000      | 0.000000      | 0.000000      |
| 22   | Ce | 5.435756      | 0.005616      | 3.960208      |
| 23   | Ce | 8.116500      | 1.913077      | 1.913077      |
| 24   | Zr | 8.179093      | 1.822294      | 5.563624      |
| 25   | O  | 1.352750      | 3.826155      | 1.913077      |
| 26   | O  | 1.401661      | 3.855955      | 5.749228      |
| 27   | O  | 4.058250      | 5.739232      | 0.000000      |

|    |    |           |          |          |
|----|----|-----------|----------|----------|
| 28 | O  | 4.019996  | 5.726201 | 3.742092 |
| 29 | O  | 4.058250  | 3.826155 | 1.913077 |
| 30 | O  | 4.016787  | 3.843486 | 5.810839 |
| 31 | O  | 1.352750  | 5.739232 | 0.000000 |
| 32 | O  | 1.435193  | 5.738734 | 3.730167 |
| 33 | Ce | 0.000000  | 3.826155 | 0.000000 |
| 34 | Ce | -0.007579 | 3.834167 | 3.923590 |
| 35 | Zr | 2.705500  | 5.739232 | 1.913077 |
| 36 | Ce | 2.710307  | 5.737834 | 5.596866 |
| 37 | O  | 6.763750  | 3.826155 | 1.913077 |
| 38 | O  | 6.659155  | 3.682580 | 5.906844 |
| 39 | O  | 9.469250  | 5.739232 | 0.000000 |
| 40 | O  | 9.495933  | 5.804917 | 3.887378 |
| 41 | O  | 9.469250  | 3.826155 | 1.913077 |
| 42 | O  | 9.220149  | 3.793834 | 5.497630 |
| 43 | O  | 6.763750  | 5.739232 | 0.000000 |
| 44 | O  | 6.769359  | 5.696023 | 3.940369 |
| 45 | Ce | 5.411000  | 3.826155 | 0.000000 |
| 46 | Ce | 5.401631  | 3.821681 | 3.825874 |
| 47 | Ce | 8.116500  | 5.739232 | 1.913077 |
| 48 | Ce | 8.164108  | 5.779472 | 5.752428 |
| 49 | N  | 7.835301  | 3.445291 | 8.336832 |
| 50 | O  | 8.345885  | 2.372179 | 7.746450 |
| 51 | O  | 8.244354  | 4.640738 | 8.021651 |
| 52 | C  | 6.936345  | 3.271229 | 9.279444 |
| 53 | H  | 6.560589  | 4.155954 | 9.786670 |
| 54 | H  | 6.661174  | 2.252412 | 9.534527 |
| 55 | H  | 5.836501  | 3.657322 | 6.452063 |

**TS6-2**

| X (Angstroms) | Y (Angstroms) | Z (Angstroms) |
|---------------|---------------|---------------|
| 1.352750000   | 0.000000000   | 1.913077397   |
| 1.441530957   | -0.031900968  | 5.762358546   |
| 4.058250000   | 1.913077397   | 0.000000000   |
| 4.075016641   | 1.924517965   | 3.875495757   |
| 4.058250000   | 0.000000000   | 1.913077397   |
| 4.020076848   | -0.024738761  | 5.749053095   |
| 1.352750000   | 1.913077397   | 0.000000000   |
| 1.367392793   | 1.913718826   | 3.882435832   |
| 0.000000000   | 0.000000000   | 0.000000000   |
| 0.014226606   | 0.000421724   | 3.911680834   |
| 2.705500000   | 1.913077397   | 1.913077397   |
| 2.702651555   | 1.907105274   | 5.646607174   |
| 6.763750000   | 0.000000000   | 1.913077397   |
| 6.878494165   | 0.079738984   | 5.749593989   |
| 9.469250000   | 1.913077397   | 0.000000000   |
| 9.464355287   | 1.865270930   | 3.848868376   |
| 9.469250000   | 0.000000000   | 1.913077397   |
| 9.421042446   | 0.117099407   | 5.793155156   |
| 6.763750000   | 1.913077397   | 0.000000000   |
| 6.830304864   | 1.944992823   | 3.890119306   |
| 5.411000000   | 0.000000000   | 0.000000000   |
| 5.443440475   | -0.001111485  | 3.949043376   |
| 8.116500000   | 1.913077397   | 1.913077397   |
| 8.185633690   | 1.824911172   | 5.526364464   |
| 1.352750000   | 3.826154793   | 1.913077397   |
| 1.409456453   | 3.856075293   | 5.752749177   |
| 4.058250000   | 5.739232190   | 0.000000000   |

|              |             |              |
|--------------|-------------|--------------|
| 4.017755668  | 5.726095671 | 3.732656015  |
| 4.058250000  | 3.826154793 | 1.913077397  |
| 4.030699267  | 3.844696212 | 5.806322273  |
| 1.352750000  | 5.739232190 | 0.000000000  |
| 1.434108620  | 5.738473427 | 3.732561580  |
| 0.000000000  | 3.826154793 | 0.000000000  |
| -0.028054910 | 3.833707475 | 3.917870995  |
| 2.705500000  | 5.739232190 | 1.913077397  |
| 2.713601199  | 5.738317082 | 5.590997614  |
| 6.763750000  | 3.826154793 | 1.913077397  |
| 6.689351757  | 3.646013503 | 5.925080892  |
| 9.469250000  | 5.739232190 | 0.000000000  |
| 9.502463349  | 5.795831897 | 3.898074999  |
| 9.469250000  | 3.826154793 | 1.913077397  |
| 9.240926557  | 3.770617501 | 5.558634154  |
| 6.763750000  | 5.739232190 | 0.000000000  |
| 6.764599739  | 5.690192172 | 3.953049662  |
| 5.411000000  | 3.826154793 | 0.000000000  |
| 5.397313544  | 3.826786991 | 3.852142323  |
| 8.116500000  | 5.739232190 | 1.913077397  |
| 8.166016796  | 5.803410941 | 5.768256172  |
| 8.394142198  | 3.435585303 | 8.468341029  |
| 8.195922604  | 2.381647235 | 7.795091477  |
| 8.104922222  | 5.067771933 | 7.979348791  |
| 7.499155578  | 3.820866776 | 9.375543121  |
| 7.786252476  | 4.503585333 | 10.131378523 |
| 6.623955063  | 3.162558327 | 9.495686160  |
| 5.884617061  | 3.606107585 | 6.491085764  |

H<sub>2</sub>CONO\*

| ATOM |    | X (Angstroms) | Y (Angstroms) | Z (Angstroms) |
|------|----|---------------|---------------|---------------|
| 1    | O  | 1.352750      | 0.000000      | 1.913077      |
| 2    | O  | 1.439622      | -0.028955     | 5.760430      |
| 3    | O  | 4.058250      | 1.913077      | 0.000000      |
| 4    | O  | 4.074513      | 1.923917      | 3.875446      |
| 5    | O  | 4.058250      | 0.000000      | 1.913077      |
| 6    | O  | 4.017402      | -0.029338     | 5.740885      |
| 7    | O  | 1.352750      | 1.913077      | 0.000000      |
| 8    | O  | 1.362793      | 1.915242      | 3.883137      |
| 9    | Ce | 0.000000      | 0.000000      | 0.000000      |
| 10   | Ce | 0.015461      | -0.001809     | 3.910709      |
| 11   | Ce | 2.705500      | 1.913077      | 1.913077      |
| 12   | Ce | 2.700200      | 1.909145      | 5.648419      |
| 13   | O  | 6.763750      | 0.000000      | 1.913077      |
| 14   | O  | 6.877132      | 0.103199      | 5.739335      |
| 15   | O  | 9.469250      | 1.913077      | 0.000000      |
| 16   | O  | 9.460383      | 1.866984      | 3.835207      |
| 17   | O  | 9.469250      | 0.000000      | 1.913077      |
| 18   | O  | 9.425636      | 0.140981      | 5.794754      |
| 19   | O  | 6.763750      | 1.913077      | 0.000000      |
| 20   | O  | 6.828985      | 1.951237      | 3.878405      |
| 21   | Ce | 5.411000      | 0.000000      | 0.000000      |
| 22   | Ce | 5.440361      | -0.004555     | 3.945233      |
| 23   | Ce | 8.116500      | 1.913077      | 1.913077      |
| 24   | Zr | 8.184805      | 1.819133      | 5.491209      |
| 25   | O  | 1.352750      | 3.826155      | 1.913077      |
| 26   | O  | 1.413823      | 3.857840      | 5.750837      |
| 27   | O  | 4.058250      | 5.739232      | 0.000000      |

|    |    |           |          |          |
|----|----|-----------|----------|----------|
| 28 | O  | 4.011927  | 5.726227 | 3.727107 |
| 29 | O  | 4.058250  | 3.826155 | 1.913077 |
| 30 | O  | 4.036391  | 3.849170 | 5.792828 |
| 31 | O  | 1.352750  | 5.739232 | 0.000000 |
| 32 | O  | 1.428261  | 5.740551 | 3.731369 |
| 33 | Ce | 0.000000  | 3.826155 | 0.000000 |
| 34 | Ce | -0.036598 | 3.838399 | 3.927692 |
| 35 | Zr | 2.705500  | 5.739232 | 1.913077 |
| 36 | Ce | 2.709978  | 5.738072 | 5.592916 |
| 37 | O  | 6.763750  | 3.826155 | 1.913077 |
| 38 | O  | 6.717847  | 3.607113 | 5.969360 |
| 39 | O  | 9.469250  | 5.739232 | 0.000000 |
| 40 | O  | 9.500156  | 5.796080 | 3.911739 |
| 41 | O  | 9.469250  | 3.826155 | 1.913077 |
| 42 | O  | 9.250421  | 3.753983 | 5.585262 |
| 43 | O  | 6.763750  | 5.739232 | 0.000000 |
| 44 | O  | 6.753404  | 5.687206 | 3.969372 |
| 45 | Ce | 5.411000  | 3.826155 | 0.000000 |
| 46 | Ce | 5.393139  | 3.831093 | 3.859575 |
| 47 | Ce | 8.116500  | 5.739232 | 1.913077 |
| 48 | Ce | 8.175534  | 5.831444 | 5.812591 |
| 49 | N  | 8.814592  | 3.341906 | 8.343574 |
| 50 | O  | 8.018418  | 2.487715 | 7.950119 |
| 51 | O  | 8.136253  | 5.436138 | 8.075676 |
| 52 | C  | 8.120483  | 4.482844 | 9.058625 |
| 53 | H  | 8.744775  | 4.751410 | 9.935673 |
| 54 | H  | 7.104993  | 4.165059 | 9.371226 |
| 55 | H  | 5.921490  | 3.555903 | 6.544081 |

**TS6-3**

| X (Angstroms) | Y (Angstroms) | Z (Angstroms) |
|---------------|---------------|---------------|
| 1.352750000   | 0.000000000   | 1.913077397   |
| 1.442256085   | -0.033409170  | 5.759436211   |
| 4.058250000   | 1.913077397   | 0.000000000   |
| 4.075060471   | 1.922917085   | 3.873963145   |
| 4.058250000   | 0.000000000   | 1.913077397   |
| 4.024991799   | -0.029308604  | 5.735349557   |
| 1.352750000   | 1.913077397   | 0.000000000   |
| 1.368472827   | 1.914253027   | 3.884065172   |
| 0.000000000   | 0.000000000   | 0.000000000   |
| 0.024815254   | 0.002507477   | 3.908202867   |
| 2.705500000   | 1.913077397   | 1.913077397   |
| 2.705973417   | 1.907645371   | 5.653230024   |
| 6.763750000   | 0.000000000   | 1.913077397   |
| 6.890786665   | 0.055157940   | 5.749433132   |
| 9.469250000   | 1.913077397   | 0.000000000   |
| 9.465646899   | 1.859494918   | 3.867170422   |
| 9.469250000   | 0.000000000   | 1.913077397   |
| 9.424191868   | 0.094198278   | 5.796232105   |
| 6.763750000   | 1.913077397   | 0.000000000   |
| 6.826994929   | 1.954478692   | 3.919659271   |
| 5.411000000   | 0.000000000   | 0.000000000   |
| 5.439210168   | 0.003645991   | 3.938037646   |
| 8.116500000   | 1.913077397   | 1.913077397   |
| 8.201119385   | 1.813588250   | 5.557257285   |
| 1.352750000   | 3.826154793   | 1.913077397   |
| 1.413850954   | 3.856984714   | 5.752502232   |
| 4.058250000   | 5.739232190   | 0.000000000   |

|              |             |              |
|--------------|-------------|--------------|
| 4.019290160  | 5.725173678 | 3.728776914  |
| 4.058250000  | 3.826154793 | 1.913077397  |
| 4.038386838  | 3.842036968 | 5.795753026  |
| 1.352750000  | 5.739232190 | 0.000000000  |
| 1.428225924  | 5.739389766 | 3.732715993  |
| 0.000000000  | 3.826154793 | 0.000000000  |
| -0.029067622 | 3.829785000 | 3.923678589  |
| 2.705500000  | 5.739232190 | 1.913077397  |
| 2.711611815  | 5.734688785 | 5.593568581  |
| 6.763750000  | 3.826154793 | 1.913077397  |
| 6.720315070  | 3.705327290 | 5.982192622  |
| 9.469250000  | 5.739232190 | 0.000000000  |
| 9.491240883  | 5.800817832 | 3.904343753  |
| 9.469250000  | 3.826154793 | 1.913077397  |
| 9.243936087  | 3.780833049 | 5.546540152  |
| 6.763750000  | 5.739232190 | 0.000000000  |
| 6.773505127  | 5.695380431 | 3.952319023  |
| 5.411000000  | 3.826154793 | 0.000000000  |
| 5.396209987  | 3.824450723 | 3.856494209  |
| 8.116500000  | 5.739232190 | 1.913077397  |
| 8.172796595  | 5.827053693 | 5.740340163  |
| 8.574608877  | 3.391949794 | 8.172906221  |
| 8.277502501  | 2.156208543 | 7.906996500  |
| 7.804871797  | 5.178277730 | 9.539441783  |
| 8.190186018  | 3.816601142 | 9.412472709  |
| 9.077317818  | 4.502034357 | 9.814222467  |
| 7.717798631  | 3.068896420 | 10.111978446 |
| 5.904329018  | 3.654770336 | 6.530913359  |

HOCHNO\*

| ATOM |    | X (Angstroms) | Y (Angstroms) | Z (Angstroms) |
|------|----|---------------|---------------|---------------|
| 1    | O  | 1.352750      | 0.000000      | 1.913077      |
| 2    | O  | 1.440973      | 7.618619      | 5.761596      |
| 3    | O  | 4.058250      | 1.913077      | 0.000000      |
| 4    | O  | 4.070859      | 1.922023      | 3.872281      |
| 5    | O  | 4.058250      | 0.000000      | 1.913077      |
| 6    | O  | 4.025371      | 7.624034      | 5.736314      |
| 7    | O  | 1.352750      | 1.913077      | 0.000000      |
| 8    | O  | 1.370965      | 1.911697      | 3.880894      |
| 9    | Ce | 0.000000      | 0.000000      | 0.000000      |
| 10   | Ce | 0.022246      | 7.651976      | 3.899898      |
| 11   | Ce | 2.705500      | 1.913077      | 1.913077      |
| 12   | Ce | 2.704523      | 1.904456      | 5.653316      |
| 13   | O  | 6.763750      | 0.000000      | 1.913077      |
| 14   | O  | 6.883841      | 0.027415      | 5.746335      |
| 15   | O  | 9.469250      | 1.913077      | 0.000000      |
| 16   | O  | 9.470293      | 1.870106      | 3.873466      |
| 17   | O  | 9.469250      | 0.000000      | 1.913077      |
| 18   | O  | 9.423506      | 0.062017      | 5.775291      |
| 19   | O  | 6.763750      | 1.913077      | 0.000000      |
| 20   | O  | 6.814389      | 1.963394      | 3.930414      |
| 21   | Ce | 5.411000      | 0.000000      | 0.000000      |
| 22   | Ce | 5.436421      | 0.007949      | 3.930600      |
| 23   | Ce | 8.116500      | 1.913077      | 1.913077      |
| 24   | Zr | 8.194127      | 1.806642      | 5.589441      |
| 25   | O  | 1.352750      | 3.826155      | 1.913077      |
| 26   | O  | 1.410167      | 3.853945      | 5.754681      |
| 27   | O  | 4.058250      | 5.739232      | 0.000000      |

|    |    |           |          |           |
|----|----|-----------|----------|-----------|
| 28 | O  | 4.016317  | 5.725590 | 3.728409  |
| 29 | O  | 4.058250  | 3.826155 | 1.913077  |
| 30 | O  | 4.030258  | 3.839287 | 5.801425  |
| 31 | O  | 1.352750  | 5.739232 | 0.000000  |
| 32 | O  | 1.427753  | 5.739724 | 3.730720  |
| 33 | Ce | 0.000000  | 3.826155 | 0.000000  |
| 34 | Ce | 10.788837 | 3.819932 | 3.928321  |
| 35 | Zr | 2.705500  | 5.739232 | 1.913077  |
| 36 | Ce | 2.710556  | 5.732019 | 5.586761  |
| 37 | O  | 6.763750  | 3.826155 | 1.913077  |
| 38 | O  | 6.694990  | 3.784447 | 5.947756  |
| 39 | O  | 9.469250  | 5.739232 | 0.000000  |
| 40 | O  | 9.488927  | 5.783241 | 3.882947  |
| 41 | O  | 9.469250  | 3.826155 | 1.913077  |
| 42 | O  | 9.248076  | 3.800164 | 5.589736  |
| 43 | O  | 6.763750  | 5.739232 | 0.000000  |
| 44 | O  | 6.772171  | 5.701565 | 3.916056  |
| 45 | Ce | 5.411000  | 3.826155 | 0.000000  |
| 46 | Ce | 5.397669  | 3.820207 | 3.853648  |
| 47 | Ce | 8.116500  | 5.739232 | 1.913077  |
| 48 | Ce | 8.161493  | 5.816935 | 5.688371  |
| 49 | N  | 8.282949  | 3.231628 | 8.393045  |
| 50 | O  | 8.264858  | 2.040665 | 7.723421  |
| 51 | O  | 8.548850  | 4.191952 | 10.471738 |
| 52 | C  | 8.508228  | 3.104666 | 9.653821  |
| 53 | H  | 8.383641  | 4.976143 | 9.893491  |
| 54 | H  | 8.676708  | 2.157376 | 10.176232 |
| 55 | H  | 5.901008  | 3.736295 | 6.528358  |

**TS6-4**

| X (Angstroms) | Y (Angstroms) | Z (Angstroms) |
|---------------|---------------|---------------|
| 1.352750000   | 0.000000000   | 1.913077397   |
| 1.439409568   | -0.035151690  | 5.758752107   |
| 4.058250000   | 1.913077397   | 0.000000000   |
| 4.076479751   | 1.922932989   | 3.870565204   |
| 4.058250000   | 0.000000000   | 1.913077397   |
| 4.028928345   | -0.031623789  | 5.735501597   |
| 1.352750000   | 1.913077397   | 0.000000000   |
| 1.364930200   | 1.915278164   | 3.880902099   |
| 0.000000000   | 0.000000000   | 0.000000000   |
| 0.039495000   | 0.000271877   | 3.885640618   |
| 2.705500000   | 1.913077397   | 1.913077397   |
| 2.705289994   | 1.903571248   | 5.649779670   |
| 6.763750000   | 0.000000000   | 1.913077397   |
| 6.902344190   | 0.061131226   | 5.749736163   |
| 9.469250000   | 1.913077397   | 0.000000000   |
| 9.448578045   | 1.867809598   | 3.896545106   |
| 9.469250000   | 0.000000000   | 1.913077397   |
| 9.429819730   | 0.090937532   | 5.786660941   |
| 6.763750000   | 1.913077397   | 0.000000000   |
| 6.843855319   | 1.962268248   | 3.951739257   |
| 5.411000000   | 0.000000000   | 0.000000000   |
| 5.423669309   | 0.002287405   | 3.926837869   |
| 8.116500000   | 1.913077397   | 1.913077397   |
| 8.188423272   | 1.824036389   | 5.553125765   |
| 1.352750000   | 3.826154793   | 1.913077397   |
| 1.402792805   | 3.860791376   | 5.757074887   |
| 4.058250000   | 5.739232190   | 0.000000000   |

|              |             |              |
|--------------|-------------|--------------|
| 4.019624377  | 5.723618221 | 3.728127838  |
| 4.058250000  | 3.826154793 | 1.913077397  |
| 4.041139020  | 3.834546982 | 5.807642735  |
| 1.352750000  | 5.739232190 | 0.000000000  |
| 1.428087070  | 5.738296066 | 3.730313152  |
| 0.000000000  | 3.826154793 | 0.000000000  |
| -0.025551249 | 3.831245486 | 3.917480503  |
| 2.705500000  | 5.739232190 | 1.913077397  |
| 2.711795528  | 5.735096236 | 5.584139988  |
| 6.763750000  | 3.826154793 | 1.913077397  |
| 6.697925378  | 3.690068036 | 6.090132979  |
| 9.469250000  | 5.739232190 | 0.000000000  |
| 9.495151391  | 5.793644487 | 3.884631241  |
| 9.469250000  | 3.826154793 | 1.913077397  |
| 9.221842180  | 3.819592483 | 5.555137589  |
| 6.763750000  | 5.739232190 | 0.000000000  |
| 6.774334574  | 5.688123316 | 3.953710817  |
| 5.411000000  | 3.826154793 | 0.000000000  |
| 5.389955737  | 3.826212721 | 3.849962956  |
| 8.116500000  | 5.739232190 | 1.913077397  |
| 8.175610150  | 5.818878589 | 5.669663275  |
| 8.759616916  | 2.814956751 | 7.955873787  |
| 7.909547752  | 1.734663897 | 8.401959303  |
| 8.182142897  | 4.436020892 | 9.569476717  |
| 8.727964097  | 3.269465691 | 9.202773267  |
| 7.535897111  | 4.669187634 | 8.844435615  |
| 9.263538913  | 2.756980891 | 10.029689471 |
| 5.789553707  | 3.621063253 | 6.483205685  |

COCHON\*

| ATOM |    | X (Angstroms) | Y (Angstroms) | Z (Angstroms) |
|------|----|---------------|---------------|---------------|
| 1    | O  | 1.352750      | 0.000000      | 1.913077      |
| 2    | O  | 1.444607      | -0.035359     | 5.754245      |
| 3    | O  | 4.058250      | 1.913077      | 0.000000      |
| 4    | O  | 4.072444      | 1.921888      | 3.868822      |
| 5    | O  | 4.058250      | 0.000000      | 1.913077      |
| 6    | O  | 4.027515      | -0.033776     | 5.733022      |
| 7    | O  | 1.352750      | 1.913077      | 0.000000      |
| 8    | O  | 1.364210      | 1.920933      | 3.882522      |
| 9    | Ce | 0.000000      | 0.000000      | 0.000000      |
| 10   | Ce | 0.034893      | 0.001424      | 3.886254      |
| 11   | Ce | 2.705500      | 1.913077      | 1.913077      |
| 12   | Ce | 2.700168      | 1.901651      | 5.656078      |
| 13   | O  | 6.763750      | 0.000000      | 1.913077      |
| 14   | O  | 6.898189      | 0.072403      | 5.764620      |
| 15   | O  | 9.469250      | 1.913077      | 0.000000      |
| 16   | O  | 9.467391      | 1.872884      | 3.878319      |
| 17   | O  | 9.469250      | 0.000000      | 1.913077      |
| 18   | O  | 9.440019      | 0.060147      | 5.769222      |
| 19   | O  | 6.763750      | 1.913077      | 0.000000      |
| 20   | O  | 6.815978      | 1.970681      | 3.925428      |
| 21   | Ce | 5.411000      | 0.000000      | 0.000000      |
| 22   | Ce | 5.427129      | 0.005104      | 3.933155      |
| 23   | Ce | 8.116500      | 1.913077      | 1.913077      |
| 24   | Zr | 8.194466      | 1.786997      | 5.553583      |
| 25   | O  | 1.352750      | 3.826155      | 1.913077      |
| 26   | O  | 1.398801      | 3.867109      | 5.755409      |
| 27   | O  | 4.058250      | 5.739232      | 0.000000      |

|    |    |           |          |          |
|----|----|-----------|----------|----------|
| 28 | O  | 4.017413  | 5.722200 | 3.726319 |
| 29 | O  | 4.058250  | 3.826155 | 1.913077 |
| 30 | O  | 4.045506  | 3.825849 | 5.803638 |
| 31 | O  | 1.352750  | 5.739232 | 0.000000 |
| 32 | O  | 1.429988  | 5.737644 | 3.729985 |
| 33 | Ce | 0.000000  | 3.826155 | 0.000000 |
| 34 | Ce | -0.032635 | 3.831615 | 3.921959 |
| 35 | Zr | 2.705500  | 5.739232 | 1.913077 |
| 36 | Ce | 2.710397  | 5.736776 | 5.593484 |
| 37 | O  | 6.763750  | 3.826155 | 1.913077 |
| 38 | O  | 6.639748  | 3.580749 | 6.187722 |
| 39 | O  | 9.469250  | 5.739232 | 0.000000 |
| 40 | O  | 9.498949  | 5.792248 | 3.884495 |
| 41 | O  | 9.469250  | 3.826155 | 1.913077 |
| 42 | O  | 9.179391  | 3.806057 | 5.594366 |
| 43 | O  | 6.763750  | 5.739232 | 0.000000 |
| 44 | O  | 6.763913  | 5.675238 | 3.982049 |
| 45 | Ce | 5.411000  | 3.826155 | 0.000000 |
| 46 | Ce | 5.386813  | 3.821994 | 3.826536 |
| 47 | Ce | 8.116500  | 5.739232 | 1.913077 |
| 48 | Ce | 8.193960  | 5.852677 | 5.719882 |
| 49 | N  | 8.782826  | 2.221832 | 7.793842 |
| 50 | O  | 7.981656  | 2.118938 | 9.004087 |
| 51 | O  | 7.830384  | 4.401751 | 8.243224 |
| 52 | C  | 8.632921  | 3.360071 | 8.605186 |
| 53 | H  | 7.209963  | 4.003441 | 7.469984 |
| 54 | H  | 9.452371  | 3.671763 | 9.262618 |
| 55 | H  | 5.667426  | 3.519068 | 6.407602 |

**TS6-5**

| X (Angstroms) | Y (Angstroms) | Z (Angstroms) |
|---------------|---------------|---------------|
| 1.352750000   | 0.000000000   | 1.913077397   |
| 1.435328081   | -0.031226471  | 5.753305774   |
| 4.058250000   | 1.913077397   | 0.000000000   |
| 4.066265624   | 1.922624348   | 3.877625726   |
| 4.058250000   | 0.000000000   | 1.913077397   |
| 4.010773972   | -0.029762988  | 5.738346886   |
| 1.352750000   | 1.913077397   | 0.000000000   |
| 1.354026758   | 1.920143586   | 3.886162223   |
| 0.000000000   | 0.000000000   | 0.000000000   |
| -0.010906001  | -0.005747588  | 3.918008517   |
| 2.705500000   | 1.913077397   | 1.913077397   |
| 2.696767936   | 1.902828514   | 5.642981694   |
| 6.763750000   | 0.000000000   | 1.913077397   |
| 6.883446448   | 0.093527991   | 5.783762191   |
| 9.469250000   | 1.913077397   | 0.000000000   |
| 9.445160684   | 1.895391525   | 3.887972066   |
| 9.469250000   | 0.000000000   | 1.913077397   |
| 9.410888394   | 0.038180066   | 5.757464621   |
| 6.763750000   | 1.913077397   | 0.000000000   |
| 6.802350792   | 1.965694128   | 3.889981971   |
| 5.411000000   | 0.000000000   | 0.000000000   |
| 5.455355602   | -0.003567509  | 3.956300979   |
| 8.116500000   | 1.913077397   | 1.913077397   |
| 8.149830195   | 1.770698773   | 5.526776418   |
| 1.352750000   | 3.826154793   | 1.913077397   |
| 1.410345665   | 3.864326248   | 5.760362511   |
| 4.058250000   | 5.739232190   | 0.000000000   |



|              |             |             |
|--------------|-------------|-------------|
| 4.009337855  | 5.725990226 | 3.729550119 |
| 4.058250000  | 3.826154793 | 1.913077397 |
| 4.036569074  | 3.836967728 | 5.803414349 |
| 1.352750000  | 5.739232190 | 0.000000000 |
| 1.424050902  | 5.738539590 | 3.734887113 |
| 0.000000000  | 3.826154793 | 0.000000000 |
| -0.027110678 | 3.836365738 | 3.919855127 |
| 2.705500000  | 5.739232190 | 1.913077397 |
| 2.713808235  | 5.743058940 | 5.583698620 |
| 6.763750000  | 3.826154793 | 1.913077397 |
| 6.662006925  | 3.582163024 | 6.031562255 |
| 9.469250000  | 5.739232190 | 0.000000000 |
| 9.486513165  | 5.767058408 | 3.901182933 |
| 9.469250000  | 3.826154793 | 1.913077397 |
| 9.258778458  | 3.781180756 | 5.621939523 |
| 6.763750000  | 5.739232190 | 0.000000000 |
| 6.759365012  | 5.674837367 | 3.994308062 |
| 5.411000000  | 3.826154793 | 0.000000000 |
| 5.406951513  | 3.825522408 | 3.865316104 |
| 8.116500000  | 5.739232190 | 1.913077397 |
| 8.192466946  | 5.799067522 | 5.868955064 |
| 9.019697264  | 2.413854252 | 7.512035738 |
| 8.365674469  | 2.307439453 | 9.230664980 |
| 8.106215858  | 4.898147988 | 8.173683833 |
| 9.045405191  | 3.215710938 | 8.555472206 |
| 7.221418029  | 4.499181198 | 8.050334717 |
| 9.849655970  | 3.823921374 | 9.004666078 |
| 5.777599536  | 3.501363273 | 6.468038150 |

**NCHO\*+OH\***

| ATOM |    | X (Angstroms) | Y (Angstroms) | Z (Angstroms) |
|------|----|---------------|---------------|---------------|
| 1    | O  | 1.352750      | 0.000000      | 1.913077      |
| 2    | O  | 1.415621      | -0.028420     | 5.713884      |
| 3    | O  | 4.058250      | 1.913077      | 0.000000      |
| 4    | O  | 4.057470      | 1.930202      | 3.869138      |
| 5    | O  | 4.058250      | 0.000000      | 1.913077      |
| 6    | O  | 3.998369      | -0.018280     | 5.737656      |
| 7    | O  | 1.352750      | 1.913077      | 0.000000      |
| 8    | O  | 1.347545      | 1.922279      | 3.867863      |
| 9    | Ce | 0.000000      | 0.000000      | 0.000000      |
| 10   | Ce | -0.003746     | 0.003505      | 3.892171      |
| 11   | Ce | 2.705500      | 1.913077      | 1.913077      |
| 12   | Ce | 2.698107      | 1.911318      | 5.651657      |
| 13   | O  | 6.763750      | 0.000000      | 1.913077      |
| 14   | O  | 6.802438      | 0.166713      | 5.813295      |
| 15   | O  | 9.469250      | 1.913077      | 0.000000      |
| 16   | O  | 9.433680      | 1.963154      | 3.925793      |
| 17   | O  | 9.469250      | 0.000000      | 1.913077      |
| 18   | O  | 9.378968      | 0.074864      | 5.727966      |
| 19   | O  | 6.763750      | 1.913077      | 0.000000      |
| 20   | O  | 6.789928      | 1.931840      | 3.856346      |
| 21   | Ce | 5.411000      | 0.000000      | 0.000000      |
| 22   | Ce | 5.412134      | 0.014843      | 3.921689      |
| 23   | Ce | 8.116500      | 1.913077      | 1.913077      |
| 24   | Zr | 8.102216      | 1.700722      | 5.522893      |
| 25   | O  | 1.352750      | 3.826155      | 1.913077      |
| 26   | O  | 1.444541      | 3.849592      | 5.728223      |
| 27   | O  | 4.058250      | 5.739232      | 0.000000      |

|    |    |           |          |          |
|----|----|-----------|----------|----------|
| 28 | O  | 3.995644  | 5.737415 | 3.724545 |
| 29 | O  | 4.058250  | 3.826155 | 1.913077 |
| 30 | O  | 4.067357  | 3.870633 | 5.774885 |
| 31 | O  | 1.352750  | 5.739232 | 0.000000 |
| 32 | O  | 1.417873  | 5.736846 | 3.719019 |
| 33 | Ce | 0.000000  | 3.826155 | 0.000000 |
| 34 | Ce | 0.023705  | 3.851618 | 3.891584 |
| 35 | Zr | 2.705500  | 5.739232 | 1.913077 |
| 36 | Ce | 2.713599  | 5.749950 | 5.591853 |
| 37 | O  | 6.763750  | 3.826155 | 1.913077 |
| 38 | O  | 6.837597  | 3.601579 | 5.961471 |
| 39 | O  | 9.469250  | 5.739232 | 0.000000 |
| 40 | O  | 9.495634  | 5.711310 | 3.936245 |
| 41 | O  | 9.469250  | 3.826155 | 1.913077 |
| 42 | O  | 9.523807  | 3.972300 | 6.018125 |
| 43 | O  | 6.763750  | 5.739232 | 0.000000 |
| 44 | O  | 6.721854  | 5.725220 | 3.967600 |
| 45 | Ce | 5.411000  | 3.826155 | 0.000000 |
| 46 | Ce | 5.388518  | 3.833053 | 3.866894 |
| 47 | Ce | 8.116500  | 5.739232 | 1.913077 |
| 48 | Ce | 8.096508  | 5.893769 | 5.865757 |
| 49 | N  | 9.404850  | 2.916611 | 6.898391 |
| 50 | O  | 10.036817 | 2.210199 | 8.977312 |
| 51 | O  | 7.983893  | 5.878751 | 8.016182 |
| 52 | C  | 10.027593 | 3.084563 | 8.104672 |
| 53 | H  | 8.095878  | 6.677778 | 8.577041 |
| 54 | H  | 10.519906 | 4.076039 | 8.212460 |
| 55 | H  | 6.113185  | 3.596845 | 6.624077 |

**TS6-6**

| X (Angstroms) | Y (Angstroms) | Z (Angstroms) |
|---------------|---------------|---------------|
| 1.352750000   | 0.000000000   | 1.913077397   |
| 1.408868507   | -0.033007290  | 5.736366247   |
| 4.058250000   | 1.913077397   | 0.000000000   |
| 4.049647089   | 1.920554798   | 3.868595387   |
| 4.058250000   | 0.000000000   | 1.913077397   |
| 3.999471321   | -0.029431588  | 5.733933603   |
| 1.352750000   | 1.913077397   | 0.000000000   |
| 1.341910504   | 1.917292841   | 3.874346317   |
| 0.000000000   | 0.000000000   | 0.000000000   |
| 0.007754614   | -0.016292290  | 3.910453919   |
| 2.705500000   | 1.913077397   | 1.913077397   |
| 2.703721615   | 1.908437548   | 5.652532743   |
| 6.763750000   | 0.000000000   | 1.913077397   |
| 6.796981345   | 0.137729758   | 5.792089161   |
| 9.469250000   | 1.913077397   | 0.000000000   |
| 9.421950053   | 1.982729199   | 3.930029772   |
| 9.469250000   | 0.000000000   | 1.913077397   |
| 9.379916447   | 0.063486359   | 5.721413278   |
| 6.763750000   | 1.913077397   | 0.000000000   |
| 6.771618641   | 1.921580713   | 3.831944251   |
| 5.411000000   | 0.000000000   | 0.000000000   |
| 5.393874055   | -0.012064094  | 3.881231352   |
| 8.116500000   | 1.913077397   | 1.913077397   |
| 8.075926013   | 1.690807701   | 5.480463651   |
| 1.352750000   | 3.826154793   | 1.913077397   |
| 1.456890140   | 3.858648568   | 5.739219166   |
| 4.058250000   | 5.739232190   | 0.000000000   |

|              |             |             |
|--------------|-------------|-------------|
| 3.989038455  | 5.736220094 | 3.716438290 |
| 4.058250000  | 3.826154793 | 1.913077397 |
| 4.066864568  | 3.867276285 | 5.773838574 |
| 1.352750000  | 5.739232190 | 0.000000000 |
| 1.415075466  | 5.735334876 | 3.728896225 |
| 0.000000000  | 3.826154793 | 0.000000000 |
| 0.046702207  | 3.845524341 | 3.876954451 |
| 2.705500000  | 5.739232190 | 1.913077397 |
| 2.721815956  | 5.741094536 | 5.608763638 |
| 6.763750000  | 3.826154793 | 1.913077397 |
| 6.822668498  | 3.613713333 | 5.895309493 |
| 9.469250000  | 5.739232190 | 0.000000000 |
| 9.496252672  | 5.682270425 | 3.957046331 |
| 9.469250000  | 3.826154793 | 1.913077397 |
| 9.647865355  | 3.938636906 | 6.298992760 |
| 6.763750000  | 5.739232190 | 0.000000000 |
| 6.725529134  | 5.719394400 | 3.970281876 |
| 5.411000000  | 3.826154793 | 0.000000000 |
| 5.380362275  | 3.841292260 | 3.847209412 |
| 8.116500000  | 5.739232190 | 1.913077397 |
| 8.127422599  | 5.864250496 | 5.872066314 |
| 8.951068989  | 2.581721003 | 7.293188474 |
| 9.857950592  | 2.423346911 | 9.489402762 |
| 7.969612890  | 5.893995839 | 8.022146984 |
| 9.678192057  | 2.818157663 | 8.341362137 |
| 8.012816492  | 6.723662583 | 8.549174152 |
| 10.194655350 | 3.794895167 | 7.525819299 |
| 6.168337588  | 3.614088992 | 6.632091675 |

NCO\*

| ATOM |    | X (Angstroms) | Y (Angstroms) | Z (Angstroms) |
|------|----|---------------|---------------|---------------|
| 1    | O  | 1.352750      | 0.000000      | 1.913077      |
| 2    | O  | 1.415321      | -0.025658     | 5.735536      |
| 3    | O  | 4.058250      | 1.913077      | 0.000000      |
| 4    | O  | 4.052662      | 1.919780      | 3.868007      |
| 5    | O  | 4.058250      | 0.000000      | 1.913077      |
| 6    | O  | 3.989969      | -0.026203     | 5.735104      |
| 7    | O  | 1.352750      | 1.913077      | 0.000000      |
| 8    | O  | 1.356034      | 1.921450      | 3.867761      |
| 9    | Ce | 0.000000      | 0.000000      | 0.000000      |
| 10   | Ce | -0.011126     | -0.000708     | 3.905768      |
| 11   | Ce | 2.705500      | 1.913077      | 1.913077      |
| 12   | Ce | 2.703095      | 1.901149      | 5.649699      |
| 13   | O  | 6.763750      | 0.000000      | 1.913077      |
| 14   | O  | 6.826583      | 0.093750      | 5.699423      |
| 15   | O  | 9.469250      | 1.913077      | 0.000000      |
| 16   | O  | 9.436912      | 1.948283      | 3.887021      |
| 17   | O  | 9.469250      | 0.000000      | 1.913077      |
| 18   | O  | 9.411523      | 0.090343      | 5.714680      |
| 19   | O  | 6.763750      | 1.913077      | 0.000000      |
| 20   | O  | 6.792284      | 1.951582      | 3.882827      |
| 21   | Ce | 5.411000      | 0.000000      | 0.000000      |
| 22   | Ce | 5.420298      | -0.000111     | 3.902170      |
| 23   | Ce | 8.116500      | 1.913077      | 1.913077      |
| 24   | Zr | 8.115864      | 1.739941      | 5.594742      |
| 25   | O  | 1.352750      | 3.826155      | 1.913077      |
| 26   | O  | 1.387652      | 3.852285      | 5.766377      |
| 27   | O  | 4.058250      | 5.739232      | 0.000000      |

|    |    |           |          |           |
|----|----|-----------|----------|-----------|
| 28 | O  | 3.991216  | 5.732963 | 3.721768  |
| 29 | O  | 4.058250  | 3.826155 | 1.913077  |
| 30 | O  | 4.012211  | 3.854129 | 5.758816  |
| 31 | O  | 1.352750  | 5.739232 | 0.000000  |
| 32 | O  | 1.415582  | 5.731399 | 3.723303  |
| 33 | Ce | 0.000000  | 3.826155 | 0.000000  |
| 34 | Ce | 0.019034  | 3.831276 | 3.862282  |
| 35 | Zr | 2.705500  | 5.739232 | 1.913077  |
| 36 | Ce | 2.703532  | 5.741828 | 5.595747  |
| 37 | O  | 6.763750  | 3.826155 | 1.913077  |
| 38 | O  | 6.795186  | 3.686830 | 5.891380  |
| 39 | O  | 9.469250  | 5.739232 | 0.000000  |
| 40 | O  | 9.495212  | 5.706997 | 3.920552  |
| 41 | O  | 9.469250  | 3.826155 | 1.913077  |
| 42 | O  | 9.452324  | 3.694916 | 5.898320  |
| 43 | O  | 6.763750  | 5.739232 | 0.000000  |
| 44 | O  | 6.733249  | 5.704041 | 3.926314  |
| 45 | Ce | 5.411000  | 3.826155 | 0.000000  |
| 46 | Ce | 5.389134  | 3.830248 | 3.868521  |
| 47 | Ce | 8.116500  | 5.739232 | 1.913077  |
| 48 | Ce | 8.115756  | 5.881929 | 5.828851  |
| 49 | N  | 8.072224  | 1.840212 | 7.784004  |
| 50 | O  | 8.535611  | 2.169029 | 10.122766 |
| 51 | O  | 8.008191  | 5.924514 | 7.962226  |
| 52 | C  | 8.309258  | 2.017937 | 8.955324  |
| 53 | H  | 7.962657  | 6.821328 | 8.371086  |
| 54 | H  | 10.065836 | 3.647726 | 6.660977  |
| 55 | H  | 6.265207  | 3.641260 | 6.714075  |

**TS6-7**

| X (Angstroms) | Y (Angstroms) | Z (Angstroms) |
|---------------|---------------|---------------|
| 1.352750000   | 0.000000000   | 1.913077397   |
| 1.398301261   | -0.022233949  | 5.741379292   |
| 4.058250000   | 1.913077397   | 0.000000000   |
| 4.051328183   | 1.915411796   | 3.881945006   |
| 4.058250000   | 0.000000000   | 1.913077397   |
| 3.979906836   | -0.025412825  | 5.738561074   |
| 1.352750000   | 1.913077397   | 0.000000000   |
| 1.351095055   | 1.918752129   | 3.871435824   |
| 0.000000000   | 0.000000000   | 0.000000000   |
| -0.016689992  | 0.022210123   | 3.918083812   |
| 2.705500000   | 1.913077397   | 1.913077397   |
| 2.703791323   | 1.904968447   | 5.656809453   |
| 6.763750000   | 0.000000000   | 1.913077397   |
| 6.808440452   | 0.099165886   | 5.720096863   |
| 9.469250000   | 1.913077397   | 0.000000000   |
| 9.414194030   | 1.945858042   | 3.900898254   |
| 9.469250000   | 0.000000000   | 1.913077397   |
| 9.387256985   | 0.093106573   | 5.738950558   |
| 6.763750000   | 1.913077397   | 0.000000000   |
| 6.764862337   | 1.997697962   | 3.954496694   |
| 5.411000000   | 0.000000000   | 0.000000000   |
| 5.399981105   | 0.016188429   | 3.922886945   |
| 8.116500000   | 1.913077397   | 1.913077397   |
| 8.062872917   | 1.864822150   | 5.630407279   |
| 1.352750000   | 3.826154793   | 1.913077397   |
| 1.400910140   | 3.850119532   | 5.780485026   |
| 4.058250000   | 5.739232190   | 0.000000000   |

|              |             |              |
|--------------|-------------|--------------|
| 3.996885517  | 5.739906906 | 3.734754565  |
| 4.058250000  | 3.826154793 | 1.913077397  |
| 4.000901234  | 3.854698981 | 5.744117963  |
| 1.352750000  | 5.739232190 | 0.000000000  |
| 1.410285254  | 5.733343700 | 3.725980709  |
| 0.000000000  | 3.826154793 | 0.000000000  |
| 0.029322353  | 3.814034472 | 3.860890349  |
| 2.705500000  | 5.739232190 | 1.913077397  |
| 2.695193953  | 5.742164262 | 5.587563189  |
| 6.763750000  | 3.826154793 | 1.913077397  |
| 6.952938044  | 3.834683905 | 6.022203687  |
| 9.469250000  | 5.739232190 | 0.000000000  |
| 9.495538760  | 5.715067217 | 3.895287323  |
| 9.469250000  | 3.826154793 | 1.913077397  |
| 9.544896899  | 3.679592493 | 5.868496572  |
| 6.763750000  | 5.739232190 | 0.000000000  |
| 6.733407507  | 5.719315843 | 3.918281958  |
| 5.411000000  | 3.826154793 | 0.000000000  |
| 5.418871090  | 3.835436783 | 3.970530112  |
| 8.116500000  | 5.739232190 | 1.913077397  |
| 8.127252507  | 5.912238383 | 5.696680214  |
| 8.087865706  | 1.911857547 | 7.805928387  |
| 8.106480433  | 0.965252557 | 10.025011683 |
| 7.936907710  | 5.074815631 | 7.882022167  |
| 8.056048612  | 1.417515419 | 8.904004635  |
| 7.628223052  | 5.598298800 | 8.648030095  |
| 10.152150928 | 3.650803917 | 6.636918427  |
| 7.254858946  | 4.368749277 | 7.302218953  |

**NCO\*+HO<sub>2</sub>\***

| ATOM |    | X (Angstroms) | Y (Angstroms) | Z (Angstroms) |
|------|----|---------------|---------------|---------------|
| 1    | O  | 1.352750      | 0.000000      | 1.913077      |
| 2    | O  | 1.389310      | -0.026145     | 5.736863      |
| 3    | O  | 4.058250      | 1.913077      | 0.000000      |
| 4    | O  | 4.040862      | 1.916842      | 3.879959      |
| 5    | O  | 4.058250      | 0.000000      | 1.913077      |
| 6    | O  | 3.969267      | -0.025708     | 5.757591      |
| 7    | O  | 1.352750      | 1.913077      | 0.000000      |
| 8    | O  | 1.339225      | 1.922089      | 3.872311      |
| 9    | Ce | 0.000000      | 0.000000      | 0.000000      |
| 10   | Ce | -0.026918     | 0.003266      | 3.936206      |
| 11   | Ce | 2.705500      | 1.913077      | 1.913077      |
| 12   | Ce | 2.707965      | 1.909738      | 5.652123      |
| 13   | O  | 6.763750      | 0.000000      | 1.913077      |
| 14   | O  | 6.808839      | 0.075285      | 5.765872      |
| 15   | O  | 9.469250      | 1.913077      | 0.000000      |
| 16   | O  | 9.410143      | 1.954142      | 3.906532      |
| 17   | O  | 9.469250      | 0.000000      | 1.913077      |
| 18   | O  | 9.347282      | 0.053877      | 5.729209      |
| 19   | O  | 6.763750      | 1.913077      | 0.000000      |
| 20   | O  | 6.763395      | 1.869461      | 3.866417      |
| 21   | Ce | 5.411000      | 0.000000      | 0.000000      |
| 22   | Ce | 5.390796      | 0.004198      | 3.904089      |
| 23   | Ce | 8.116500      | 1.913077      | 1.913077      |
| 24   | Zr | 8.044688      | 1.824075      | 5.566438      |
| 25   | O  | 1.352750      | 3.826155      | 1.913077      |
| 26   | O  | 1.384773      | 3.846103      | 5.787901      |
| 27   | O  | 4.058250      | 5.739232      | 0.000000      |

|    |    |           |          |          |
|----|----|-----------|----------|----------|
| 28 | O  | 3.980444  | 5.739688 | 3.730973 |
| 29 | O  | 4.058250  | 3.826155 | 1.913077 |
| 30 | O  | 4.002415  | 3.856075 | 5.753302 |
| 31 | O  | 1.352750  | 5.739232 | 0.000000 |
| 32 | O  | 1.395408  | 5.727487 | 3.727527 |
| 33 | Ce | 0.000000  | 3.826155 | 0.000000 |
| 34 | Ce | 0.018569  | 3.822973 | 3.861704 |
| 35 | Zr | 2.705500  | 5.739232 | 1.913077 |
| 36 | Ce | 2.701078  | 5.736487 | 5.590880 |
| 37 | O  | 6.763750  | 3.826155 | 1.913077 |
| 38 | O  | 6.983859  | 3.790813 | 5.576643 |
| 39 | O  | 9.469250  | 5.739232 | 0.000000 |
| 40 | O  | 9.469028  | 5.692736 | 3.932750 |
| 41 | O  | 9.469250  | 3.826155 | 1.913077 |
| 42 | O  | 9.519555  | 3.683067 | 5.937854 |
| 43 | O  | 6.763750  | 5.739232 | 0.000000 |
| 44 | O  | 6.734017  | 5.789758 | 3.878486 |
| 45 | Ce | 5.411000  | 3.826155 | 0.000000 |
| 46 | Ce | 5.442842  | 3.828951 | 3.924027 |
| 47 | Ce | 8.116500  | 5.739232 | 1.913077 |
| 48 | Ce | 8.060794  | 5.828103 | 5.722330 |
| 49 | N  | 7.955194  | 2.039571 | 7.845819 |
| 50 | O  | 7.682232  | 0.234966 | 9.427719 |
| 51 | O  | 8.038801  | 4.992633 | 8.129826 |
| 52 | C  | 7.816021  | 1.127278 | 8.635070 |
| 53 | H  | 7.809070  | 5.416187 | 8.984080 |
| 54 | H  | 10.257198 | 3.640147 | 6.584523 |
| 55 | H  | 7.938930  | 3.995239 | 8.190706 |

**ONOH<sub>2</sub>CHCO\***

| ATOM |    | X (Angstroms) | Y (Angstroms) | Z (Angstroms) |
|------|----|---------------|---------------|---------------|
| 1    | O  | 1.430436      | -0.002892     | 1.905034      |
| 2    | O  | 1.481076      | -0.031451     | 5.761938      |
| 3    | O  | 4.135936      | 1.910185      | -0.008043     |
| 4    | O  | 4.137835      | 1.914982      | 3.892886      |
| 5    | O  | 4.135936      | -0.002892     | 1.905034      |
| 6    | O  | 4.070101      | -0.017259     | 5.786640      |
| 7    | O  | 1.430436      | 1.910185      | -0.008043     |
| 8    | O  | 1.426648      | 1.907587      | 3.883158      |
| 9    | Ce | 0.077686      | -0.002892     | -0.008043     |
| 10   | Ce | 0.066482      | -0.000228     | 3.933077      |
| 11   | Ce | 2.783186      | 1.910185      | 1.905034      |
| 12   | Ce | 2.768973      | 1.907791      | 5.654560      |
| 13   | O  | 6.841436      | -0.002892     | 1.905034      |
| 14   | O  | 6.910182      | 0.039433      | 5.741049      |
| 15   | O  | 9.546936      | 1.910185      | -0.008043     |
| 16   | O  | 9.518978      | 1.911631      | 3.843089      |
| 17   | O  | 9.546936      | -0.002892     | 1.905034      |
| 18   | O  | 9.445163      | 0.100815      | 5.724324      |
| 19   | O  | 6.841436      | 1.910185      | -0.008043     |
| 20   | O  | 6.889805      | 1.906487      | 3.872559      |
| 21   | Ce | 5.488686      | -0.002892     | -0.008043     |
| 22   | Ce | 5.494962      | 0.000359      | 3.933668      |
| 23   | Ce | 8.194186      | 1.910185      | 1.905034      |
| 24   | Zr | 8.222624      | 1.913221      | 5.466756      |
| 25   | O  | 1.430436      | 3.823263      | 1.905034      |
| 26   | O  | 1.487406      | 3.849116      | 5.755576      |
| 27   | O  | 4.135936      | 5.736340      | -0.008043     |

|    |    |          |          |           |
|----|----|----------|----------|-----------|
| 28 | O  | 4.076480 | 5.740226 | 3.741053  |
| 29 | O  | 4.135936 | 3.823263 | 1.905034  |
| 30 | O  | 4.082294 | 3.860427 | 5.791498  |
| 31 | O  | 1.430436 | 5.736340 | -0.008043 |
| 32 | O  | 1.484836 | 5.737102 | 3.732099  |
| 33 | Ce | 0.077686 | 3.823263 | -0.008043 |
| 34 | Ce | 0.069807 | 3.819396 | 3.933755  |
| 35 | Zr | 2.783186 | 5.736340 | 1.905034  |
| 36 | Ce | 2.774865 | 5.741940 | 5.587179  |
| 37 | O  | 6.841436 | 3.823263 | 1.905034  |
| 38 | O  | 6.907734 | 3.781734 | 5.714921  |
| 39 | O  | 9.546936 | 5.736340 | -0.008043 |
| 40 | O  | 9.550634 | 5.733248 | 3.905467  |
| 41 | O  | 9.546936 | 3.823263 | 1.905034  |
| 42 | O  | 9.442031 | 3.717826 | 5.736429  |
| 43 | O  | 6.841436 | 5.736340 | -0.008043 |
| 44 | O  | 6.834222 | 5.740973 | 3.880837  |
| 45 | Ce | 5.488686 | 3.823263 | -0.008043 |
| 46 | Ce | 5.494797 | 3.826445 | 3.926551  |
| 47 | Ce | 8.194186 | 5.736340 | 1.905034  |
| 48 | Ce | 8.177631 | 5.736210 | 5.651085  |
| 49 | N  | 8.813338 | 2.469394 | 8.963242  |
| 50 | O  | 8.347247 | 2.587989 | 10.031284 |
| 51 | O  | 7.797568 | 1.894770 | 7.922967  |
| 52 | C  | 5.605957 | 2.888454 | 8.455148  |
| 53 | C  | 6.453724 | 1.649239 | 8.428845  |
| 54 | H  | 5.300981 | 3.349905 | 7.497386  |
| 55 | H  | 6.540293 | 1.187000 | 9.425078  |
| 56 | H  | 6.062489 | 0.908909 | 7.714252  |
| 57 | C  | 5.278454 | 3.528511 | 9.561862  |
| 58 | O  | 4.954334 | 4.109492 | 10.534255 |

**TS7-1**

| X (Angstroms) | Y (Angstroms) | Z (Angstroms) |
|---------------|---------------|---------------|
| 1.430436238   | -0.002892170  | 1.905034240   |
| 1.491626307   | -0.033968812  | 5.759490405   |
| 4.135936238   | 1.910185227   | -0.008043157  |
| 4.142683771   | 1.921076933   | 3.895133439   |
| 4.135936238   | -0.002892170  | 1.905034240   |
| 4.079344779   | -0.007681863  | 5.792439760   |
| 1.430436238   | 1.910185227   | -0.008043157  |
| 1.435404094   | 1.909317558   | 3.882036750   |
| 0.077686238   | -0.002892170  | -0.008043157  |
| 0.069848199   | 0.000266130   | 3.930227630   |
| 2.783186238   | 1.910185227   | 1.905034240   |
| 2.770942636   | 1.910837740   | 5.649056179   |
| 6.841436238   | -0.002892170  | 1.905034240   |
| 6.924079262   | 0.061078871   | 5.766448196   |
| 9.546936238   | 1.910185227   | -0.008043157  |
| 9.528275467   | 1.909925786   | 3.838807250   |
| 9.546936238   | -0.002892170  | 1.905034240   |
| 9.457091808   | 0.104585074   | 5.728719410   |
| 6.841436238   | 1.910185227   | -0.008043157  |
| 6.899289725   | 1.896735431   | 3.867989899   |
| 5.488686238   | -0.002892170  | -0.008043157  |
| 5.506234045   | 0.005335036   | 3.944184449   |
| 8.194186238   | 1.910185227   | 1.905034240   |
| 8.230838797   | 1.913349252   | 5.491358505   |

|             |             |              |
|-------------|-------------|--------------|
| 1.430436238 | 3.823262623 | 1.905034240  |
| 1.494262957 | 3.854565452 | 5.752215419  |
| 4.135936238 | 5.736340020 | -0.008043157 |
| 4.084174868 | 5.737452914 | 3.748622403  |
| 4.135936238 | 3.823262623 | 1.905034240  |
| 4.086618138 | 3.858002369 | 5.829141627  |
| 1.430436238 | 5.736340020 | -0.008043157 |
| 1.493734405 | 5.737614687 | 3.730786464  |
| 0.077686238 | 3.823262623 | -0.008043157 |
| 0.069933698 | 3.820482010 | 3.928061309  |
| 2.783186238 | 5.736340020 | 1.905034240  |
| 2.778956516 | 5.743659280 | 5.588829533  |
| 6.841436238 | 3.823262623 | 1.905034240  |
| 6.911393225 | 3.775976012 | 5.684974058  |
| 9.546936238 | 5.736340020 | -0.008043157 |
| 9.552653766 | 5.738107975 | 3.913396799  |
| 9.546936238 | 3.823262623 | 1.905034240  |
| 9.452081968 | 3.718736010 | 5.721263396  |
| 6.841436238 | 5.736340020 | -0.008043157 |
| 6.843315069 | 5.755337305 | 3.896188729  |
| 5.488686238 | 3.823262623 | -0.008043157 |
| 5.505182799 | 3.826749595 | 3.928337674  |
| 8.194186238 | 5.736340020 | 1.905034240  |
| 8.191521998 | 5.734720150 | 5.672498188  |
| 7.697414088 | 3.709904019 | 8.604087601  |
| 7.806873477 | 3.630052137 | 9.830913751  |
| 7.821582031 | 2.041461503 | 7.983490832  |
| 5.948182649 | 3.321740526 | 8.487939544  |
| 6.458477231 | 1.865776909 | 8.324985800  |
| 5.204900559 | 3.718249310 | 7.739827448  |
| 6.334931987 | 1.286377866 | 9.255314708  |
| 5.939252043 | 1.337424203 | 7.522849527  |
| 5.816281205 | 3.736169734 | 9.827482005  |
| 5.328142619 | 4.160390666 | 10.800767674 |

OCH<sub>2</sub>CNHCO<sub>2</sub>\*

| ATOM |    | X (Angstroms) | Y (Angstroms) | Z (Angstroms) |
|------|----|---------------|---------------|---------------|
| 1    | O  | 1.430436      | -0.002892     | 1.905034      |
| 2    | O  | 1.486222      | -0.037505     | 5.752338      |
| 3    | O  | 4.135936      | 1.910185      | -0.008043     |
| 4    | O  | 4.140958      | 1.919991      | 3.895632      |
| 5    | O  | 4.135936      | -0.002892     | 1.905034      |
| 6    | O  | 4.077479      | -0.004981     | 5.797150      |
| 7    | O  | 1.430436      | 1.910185      | -0.008043     |
| 8    | O  | 1.427699      | 1.908024      | 3.878642      |
| 9    | Ce | 0.077686      | -0.002892     | -0.008043     |
| 10   | Ce | 0.073195      | -0.006411     | 3.923830      |
| 11   | Ce | 2.783186      | 1.910185      | 1.905034      |
| 12   | Ce | 2.764712      | 1.910826      | 5.647796      |
| 13   | O  | 6.841436      | -0.002892     | 1.905034      |
| 14   | O  | 6.925104      | 0.071365      | 5.784493      |
| 15   | O  | 9.546936      | 1.910185      | -0.008043     |
| 16   | O  | 9.527271      | 1.907360      | 3.835074      |
| 17   | O  | 9.546936      | -0.002892     | 1.905034      |
| 18   | O  | 9.453006      | 0.108901      | 5.735539      |
| 19   | O  | 6.841436      | 1.910185      | -0.008043     |
| 20   | O  | 6.897548      | 1.891922      | 3.862952      |
| 21   | Ce | 5.488686      | -0.002892     | -0.008043     |



|    |    |          |          |           |
|----|----|----------|----------|-----------|
| 22 | Ce | 5.500595 | 0.002982 | 3.944811  |
| 23 | Ce | 8.194186 | 1.910185 | 1.905034  |
| 24 | Zr | 8.242008 | 1.906397 | 5.447216  |
| 25 | O  | 1.430436 | 3.823263 | 1.905034  |
| 26 | O  | 1.485064 | 3.854511 | 5.744710  |
| 27 | O  | 4.135936 | 5.736340 | -0.008043 |
| 28 | O  | 4.082622 | 5.738430 | 3.751547  |
| 29 | O  | 4.135936 | 3.823263 | 1.905034  |
| 30 | O  | 4.077927 | 3.856277 | 5.835001  |
| 31 | O  | 1.430436 | 5.736340 | -0.008043 |
| 32 | O  | 1.489630 | 5.736855 | 3.728216  |
| 33 | Ce | 0.077686 | 3.823263 | -0.008043 |
| 34 | Ce | 0.071161 | 3.822389 | 3.925173  |
| 35 | Zr | 2.783186 | 5.736340 | 1.905034  |
| 36 | Ce | 2.775132 | 5.741074 | 5.591338  |
| 37 | O  | 6.841436 | 3.823263 | 1.905034  |
| 38 | O  | 6.898990 | 3.761994 | 5.674745  |
| 39 | O  | 9.546936 | 5.736340 | -0.008043 |
| 40 | O  | 9.551746 | 5.736492 | 3.915722  |
| 41 | O  | 9.546936 | 3.823263 | 1.905034  |
| 42 | O  | 9.442143 | 3.710629 | 5.725034  |
| 43 | O  | 6.841436 | 5.736340 | -0.008043 |
| 44 | O  | 6.840343 | 5.757576 | 3.900995  |
| 45 | Ce | 5.488686 | 3.823263 | -0.008043 |
| 46 | Ce | 5.497210 | 3.827519 | 3.927052  |
| 47 | Ce | 8.194186 | 5.736340 | 1.905034  |
| 48 | Ce | 8.187726 | 5.730035 | 5.675852  |
| 49 | N  | 7.444333 | 3.756149 | 8.229336  |
| 50 | O  | 7.553950 | 4.038937 | 9.753128  |
| 51 | O  | 7.746894 | 2.332982 | 8.039781  |
| 52 | C  | 5.985139 | 3.417252 | 8.481746  |
| 53 | C  | 6.344076 | 1.937854 | 8.310026  |
| 54 | H  | 5.243132 | 3.848990 | 7.794224  |
| 55 | H  | 6.276316 | 1.307585 | 9.208778  |
| 56 | H  | 5.919456 | 1.424457 | 7.438233  |
| 57 | C  | 6.181019 | 3.895793 | 9.895876  |
| 58 | O  | 5.519106 | 4.117226 | 10.872791 |

#### TS7-2

| X (Angstroms) | Y (Angstroms) | Z (Angstroms) |
|---------------|---------------|---------------|
| 1.430436238   | -0.002892170  | 1.905034240   |
| 1.477375405   | -0.034218941  | 5.789094340   |
| 4.135936238   | 1.910185227   | -0.008043157  |
| 4.133295572   | 1.973994379   | 3.951535623   |
| 4.135936238   | -0.002892170  | 1.905034240   |
| 4.051680576   | -0.011748135  | 5.790366023   |
| 1.430436238   | 1.910185227   | -0.008043157  |
| 1.429012183   | 1.892577374   | 3.890384302   |
| 0.077686238   | -0.002892170  | -0.008043157  |
| 0.051311740   | 0.001042810   | 3.928100620   |
| 2.783186238   | 1.910185227   | 1.905034240   |
| 2.764308598   | 1.882222548   | 5.699088149   |
| 6.841436238   | -0.002892170  | 1.905034240   |
| 6.898467275   | 0.047296012   | 5.745210778   |
| 9.546936238   | 1.910185227   | -0.008043157  |
| 9.517883934   | 1.910200839   | 3.856265495   |
| 9.546936238   | -0.002892170  | 1.905034240   |
| 9.436888263   | 0.081399850   | 5.729805148   |

|             |              |              |
|-------------|--------------|--------------|
| 6.841436238 | 1.910185227  | -0.008043157 |
| 6.889974014 | 1.893555786  | 3.877885703  |
| 5.488686238 | -0.002892170 | -0.008043157 |
| 5.513247695 | 0.006549937  | 3.953018847  |
| 8.194186238 | 1.910185227  | 1.905034240  |
| 8.206740279 | 1.905854236  | 5.542405960  |
| 1.430436238 | 3.823262623  | 1.905034240  |
| 1.579527018 | 3.844109134  | 5.712478870  |
| 4.135936238 | 5.736340020  | -0.008043157 |
| 4.079827463 | 5.692740328  | 3.795542081  |
| 4.135936238 | 3.823262623  | 1.905034240  |
| 4.271055958 | 3.876497636  | 6.311670023  |
| 1.430436238 | 5.736340020  | -0.008043157 |
| 1.491317244 | 5.750249485  | 3.739544727  |
| 0.077686238 | 3.823262623  | -0.008043157 |
| 0.067102825 | 3.817624187  | 3.923116152  |
| 2.783186238 | 5.736340020  | 1.905034240  |
| 2.784823263 | 5.756125543  | 5.639494220  |
| 6.841436238 | 3.823262623  | 1.905034240  |
| 6.915402445 | 3.792334951  | 5.632242126  |
| 9.546936238 | 5.736340020  | -0.008043157 |
| 9.545227320 | 5.737187005  | 3.898966383  |
| 9.546936238 | 3.823262623  | 1.905034240  |
| 9.463750563 | 3.747191609  | 5.706522288  |
| 6.841436238 | 5.736340020  | -0.008043157 |
| 6.837955200 | 5.756182925  | 3.879652590  |
| 5.488686238 | 3.823262623  | -0.008043157 |
| 5.541270137 | 3.830043773  | 3.930919234  |
| 8.194186238 | 5.736340020  | 1.905034240  |
| 8.195390220 | 5.715348440  | 5.690904113  |
| 7.491938232 | 4.121572836  | 8.306183452  |
| 7.584525681 | 4.548197468  | 9.611141546  |
| 7.866015781 | 2.135446749  | 7.793386154  |
| 6.157616617 | 3.523985742  | 8.448886124  |
| 6.558581843 | 2.025445488  | 8.322215737  |
| 5.183040706 | 3.824619109  | 7.391219578  |
| 6.547007266 | 1.495384175  | 9.309620214  |
| 5.919032480 | 1.432461796  | 7.642138722  |
| 6.185516297 | 4.020527548  | 9.877731319  |
| 5.655031268 | 4.171394468  | 10.918689014 |

**OCH<sub>2</sub>CNCO<sub>2</sub>\***

| ATOM |    | X (Angstroms) | Y (Angstroms) | Z (Angstroms) |
|------|----|---------------|---------------|---------------|
| 1    | O  | 1.430436      | -0.002892     | 1.905034      |
| 2    | O  | 1.437636      | -0.038777     | 5.809128      |
| 3    | O  | 4.135936      | 1.910185      | -0.008043     |
| 4    | O  | 4.120110      | 1.962009      | 3.937857      |
| 5    | O  | 4.135936      | -0.002892     | 1.905034      |
| 6    | O  | 4.007104      | -0.025820     | 5.769675      |
| 7    | O  | 1.430436      | 1.910185      | -0.008043     |
| 8    | O  | 1.423125      | 1.879439      | 3.885730      |
| 9    | Ce | 0.077686      | -0.002892     | -0.008043     |
| 10   | Ce | 0.025605      | -0.004732     | 3.903648      |
| 11   | Ce | 2.783186      | 1.910185      | 1.905034      |
| 12   | Ce | 2.717955      | 1.843140      | 5.672230      |
| 13   | O  | 6.841436      | -0.002892     | 1.905034      |
| 14   | O  | 6.854381      | 0.025948      | 5.696162      |
| 15   | O  | 9.546936      | 1.910185      | -0.008043     |
| 16   | O  | 9.527105      | 1.900757      | 3.855721      |

|    |    |          |           |           |
|----|----|----------|-----------|-----------|
| 17 | O  | 9.546936 | -0.002892 | 1.905034  |
| 18 | O  | 9.408785 | 0.039732  | 5.687497  |
| 19 | O  | 6.841436 | 1.910185  | -0.008043 |
| 20 | O  | 6.877241 | 1.914637  | 3.867174  |
| 21 | Ce | 5.488686 | -0.002892 | -0.008043 |
| 22 | Ce | 5.501654 | 0.003852  | 3.926543  |
| 23 | Ce | 8.194186 | 1.910185  | 1.905034  |
| 24 | Zr | 8.184271 | 1.815112  | 5.564568  |
| 25 | O  | 1.430436 | 3.823263  | 1.905034  |
| 26 | O  | 1.562137 | 3.846978  | 5.706653  |
| 27 | O  | 4.135936 | 5.736340  | -0.008043 |
| 28 | O  | 4.067106 | 5.689989  | 3.781809  |
| 29 | O  | 4.135936 | 3.823263  | 1.905034  |
| 30 | O  | 4.140750 | 3.838867  | 6.180877  |
| 31 | O  | 1.430436 | 5.736340  | -0.008043 |
| 32 | O  | 1.485189 | 5.760753  | 3.735719  |
| 33 | Ce | 0.077686 | 3.823263  | -0.008043 |
| 34 | Ce | 0.035926 | 3.820395  | 3.911564  |
| 35 | Zr | 2.783186 | 5.736340  | 1.905034  |
| 36 | Ce | 2.724012 | 5.786857  | 5.605825  |
| 37 | O  | 6.841436 | 3.823263  | 1.905034  |
| 38 | O  | 6.735342 | 3.823553  | 5.732158  |
| 39 | O  | 9.546936 | 5.736340  | -0.008043 |
| 40 | O  | 9.543947 | 5.739429  | 3.855231  |
| 41 | O  | 9.546936 | 3.823263  | 1.905034  |
| 42 | O  | 9.376003 | 3.800907  | 5.628751  |
| 43 | O  | 6.841436 | 5.736340  | -0.008043 |
| 44 | O  | 6.822939 | 5.732355  | 3.842215  |
| 45 | Ce | 5.488686 | 3.823263  | -0.008043 |
| 46 | Ce | 5.533834 | 3.824552  | 3.840701  |
| 47 | Ce | 8.194186 | 5.736340  | 1.905034  |
| 48 | Ce | 8.157419 | 5.711677  | 5.683814  |
| 49 | N  | 7.816475 | 4.909822  | 8.369269  |
| 50 | O  | 7.294794 | 5.841305  | 9.511308  |
| 51 | O  | 8.183936 | 1.997104  | 7.625660  |
| 52 | C  | 7.368698 | 3.854049  | 8.964911  |
| 53 | C  | 7.368228 | 2.401967  | 8.636814  |
| 54 | H  | 5.120252 | 3.832693  | 6.403813  |
| 55 | H  | 7.619281 | 1.886584  | 9.595588  |
| 56 | H  | 6.286768 | 2.152101  | 8.473612  |
| 57 | C  | 6.828717 | 4.686432  | 10.114877 |
| 58 | O  | 6.238985 | 4.567806  | 11.148822 |

### TS7-3

| X (Angstroms) | Y (Angstroms) | Z (Angstroms) |
|---------------|---------------|---------------|
| 1.430436238   | -0.002892170  | 1.905034240   |
| 1.440115917   | -0.038152222  | 5.806363984   |
| 4.135936238   | 1.910185227   | -0.008043157  |
| 4.122183775   | 1.963745994   | 3.936726066   |
| 4.135936238   | -0.002892170  | 1.905034240   |
| 4.010203238   | -0.025562658  | 5.763845965   |
| 1.430436238   | 1.910185227   | -0.008043157  |
| 1.423350418   | 1.879732159   | 3.885907480   |
| 0.077686238   | -0.002892170  | -0.008043157  |
| 0.028238767   | -0.004944412  | 3.900370305   |
| 2.783186238   | 1.910185227   | 1.905034240   |
| 2.721385073   | 1.840859408   | 5.677725515   |
| 6.841436238   | -0.002892170  | 1.905034240   |

|             |              |              |
|-------------|--------------|--------------|
| 6.861032054 | 0.032898667  | 5.684852421  |
| 9.546936238 | 1.910185227  | -0.008043157 |
| 9.527090144 | 1.901123636  | 3.851913581  |
| 9.546936238 | -0.002892170 | 1.905034240  |
| 9.411961843 | 0.041609027  | 5.680926795  |
| 6.841436238 | 1.910185227  | -0.008043157 |
| 6.877477284 | 1.918094796  | 3.864661693  |
| 5.488686238 | -0.002892170 | -0.008043157 |
| 5.500526965 | 0.003118494  | 3.922860453  |
| 8.194186238 | 1.910185227  | 1.905034240  |
| 8.187675734 | 1.817776666  | 5.549492467  |
| 1.430436238 | 3.823262623  | 1.905034240  |
| 1.565684042 | 3.845636559  | 5.705009646  |
| 4.135936238 | 5.736340020  | -0.008043157 |
| 4.067314810 | 5.690290374  | 3.782671980  |
| 4.135936238 | 3.823262623  | 1.905034240  |
| 4.146158740 | 3.840138098  | 6.174306413  |
| 1.430436238 | 5.736340020  | -0.008043157 |
| 1.483991076 | 5.759810431  | 3.735071302  |
| 0.077686238 | 3.823262623  | -0.008043157 |
| 0.043181003 | 3.819788091  | 3.912769072  |
| 2.783186238 | 5.736340020  | 1.905034240  |
| 2.729550895 | 5.786909739  | 5.611165017  |
| 6.841436238 | 3.823262623  | 1.905034240  |
| 6.745720775 | 3.821451883  | 5.730962231  |
| 9.546936238 | 5.736340020  | -0.008043157 |
| 9.544830641 | 5.739376965  | 3.854841064  |
| 9.546936238 | 3.823262623  | 1.905034240  |
| 9.377114862 | 3.797857836  | 5.638578833  |
| 6.841436238 | 5.736340020  | -0.008043157 |
| 6.824871345 | 5.732255510  | 3.841927881  |
| 5.488686238 | 3.823262623  | -0.008043157 |
| 5.536303925 | 3.825538580  | 3.844072178  |
| 8.194186238 | 5.736340020  | 1.905034240  |
| 8.158134560 | 5.723223548  | 5.690875562  |
| 7.913910753 | 4.886245714  | 8.327032717  |
| 6.735795570 | 6.110586250  | 9.655356736  |
| 8.200433859 | 1.977381333  | 7.630208173  |
| 7.393668684 | 3.949554589  | 8.929617741  |
| 7.414997609 | 2.415886174  | 8.633332897  |
| 5.122819517 | 3.835978757  | 6.406418833  |
| 7.687286544 | 1.954625201  | 9.605137650  |
| 6.333635224 | 2.216974508  | 8.488303160  |
| 6.578211783 | 4.916668972  | 10.106563645 |
| 6.003514635 | 4.499626075  | 11.096209262 |

**OCH<sub>2</sub>CN\*+CO<sub>2</sub>\***

| ATOM |    | X (Angstroms) | Y (Angstroms) | Z (Angstroms) |
|------|----|---------------|---------------|---------------|
| 1    | O  | 1.430436      | -0.002892     | 1.905034      |
| 2    | O  | 1.441892      | -0.035753     | 5.808269      |
| 3    | O  | 4.135936      | 1.910185      | -0.008043     |
| 4    | O  | 4.122443      | 1.970283      | 3.936070      |
| 5    | O  | 4.135936      | -0.002892     | 1.905034      |
| 6    | O  | 4.011986      | -0.024219     | 5.750218      |
| 7    | O  | 1.430436      | 1.910185      | -0.008043     |
| 8    | O  | 1.424005      | 1.880606      | 3.886552      |
| 9    | Ce | 0.077686      | -0.002892     | -0.008043     |
| 10   | Ce | 0.026035      | -0.003054     | 3.900874      |

|    |    |          |           |           |
|----|----|----------|-----------|-----------|
| 11 | Ce | 2.783186 | 1.910185  | 1.905034  |
| 12 | Ce | 2.723242 | 1.842939  | 5.673528  |
| 13 | O  | 6.841436 | -0.002892 | 1.905034  |
| 14 | O  | 6.860574 | 0.030727  | 5.666811  |
| 15 | O  | 9.546936 | 1.910185  | -0.008043 |
| 16 | O  | 9.526408 | 1.899817  | 3.847287  |
| 17 | O  | 9.546936 | -0.002892 | 1.905034  |
| 18 | O  | 9.412850 | 0.047530  | 5.682621  |
| 19 | O  | 6.841436 | 1.910185  | -0.008043 |
| 20 | O  | 6.874208 | 1.928611  | 3.864425  |
| 21 | Ce | 5.488686 | -0.002892 | -0.008043 |
| 22 | Ce | 5.501575 | 0.005731  | 3.916795  |
| 23 | Ce | 8.194186 | 1.910185  | 1.905034  |
| 24 | Zr | 8.191755 | 1.818817  | 5.562347  |
| 25 | O  | 1.430436 | 3.823263  | 1.905034  |
| 26 | O  | 1.570833 | 3.846679  | 5.710171  |
| 27 | O  | 4.135936 | 5.736340  | -0.008043 |
| 28 | O  | 4.065533 | 5.687851  | 3.781142  |
| 29 | O  | 4.135936 | 3.823263  | 1.905034  |
| 30 | O  | 4.152343 | 3.847338  | 6.181913  |
| 31 | O  | 1.430436 | 5.736340  | -0.008043 |
| 32 | O  | 1.484121 | 5.760956  | 3.735748  |
| 33 | Ce | 0.077686 | 3.823263  | -0.008043 |
| 34 | Ce | 0.035750 | 3.819782  | 3.918998  |
| 35 | Zr | 2.783186 | 5.736340  | 1.905034  |
| 36 | Ce | 2.729781 | 5.790513  | 5.604786  |
| 37 | O  | 6.841436 | 3.823263  | 1.905034  |
| 38 | O  | 6.753210 | 3.822060  | 5.750325  |
| 39 | O  | 9.546936 | 5.736340  | -0.008043 |
| 40 | O  | 9.544892 | 5.741350  | 3.856870  |
| 41 | O  | 9.546936 | 3.823263  | 1.905034  |
| 42 | O  | 9.379844 | 3.791917  | 5.634794  |
| 43 | O  | 6.841436 | 5.736340  | -0.008043 |
| 44 | O  | 6.822926 | 5.728773  | 3.839061  |
| 45 | Ce | 5.488686 | 3.823263  | -0.008043 |
| 46 | Ce | 5.539190 | 3.826544  | 3.845289  |
| 47 | Ce | 8.194186 | 5.736340  | 1.905034  |
| 48 | Ce | 8.160727 | 5.726961  | 5.685295  |
| 49 | N  | 8.064516 | 5.204512  | 8.384214  |
| 50 | O  | 4.769838 | 6.754799  | 9.212385  |
| 51 | O  | 8.185181 | 1.917563  | 7.642741  |
| 52 | C  | 7.798991 | 4.075058  | 8.523459  |
| 53 | C  | 7.507611 | 2.622413  | 8.605524  |
| 54 | H  | 5.132394 | 3.837623  | 6.405100  |
| 55 | H  | 7.793441 | 2.294872  | 9.628610  |
| 56 | H  | 6.401633 | 2.523612  | 8.539872  |
| 57 | C  | 4.977459 | 5.803124  | 9.867990  |
| 58 | O  | 5.168054 | 4.849279  | 10.530066 |

**OCH<sub>2</sub>CN\***

| ATOM |   | X (Angstroms) | Y (Angstroms) | Z (Angstroms) |
|------|---|---------------|---------------|---------------|
| 1    | O | 1.430436      | -0.002892     | 1.905034      |
| 2    | O | 1.442091      | -0.037347     | 5.808810      |
| 3    | O | 4.135936      | 1.910185      | -0.008043     |
| 4    | O | 4.122110      | 1.968871      | 3.935584      |
| 5    | O | 4.135936      | -0.002892     | 1.905034      |
| 6    | O | 4.017767      | -0.026275     | 5.764244      |
| 7    | O | 1.430436      | 1.910185      | -0.008043     |

|    |    |          |           |           |
|----|----|----------|-----------|-----------|
| 8  | O  | 1.423753 | 1.880071  | 3.886420  |
| 9  | Ce | 0.077686 | -0.002892 | -0.008043 |
| 10 | Ce | 0.025594 | -0.002764 | 3.900526  |
| 11 | Ce | 2.783186 | 1.910185  | 1.905034  |
| 12 | Ce | 2.723276 | 1.840705  | 5.672331  |
| 13 | O  | 6.841436 | -0.002892 | 1.905034  |
| 14 | O  | 6.858399 | 0.029136  | 5.669408  |
| 15 | O  | 9.546936 | 1.910185  | -0.008043 |
| 16 | O  | 9.524164 | 1.899457  | 3.850129  |
| 17 | O  | 9.546936 | -0.002892 | 1.905034  |
| 18 | O  | 9.411842 | 0.049691  | 5.681043  |
| 19 | O  | 6.841436 | 1.910185  | -0.008043 |
| 20 | O  | 6.874168 | 1.926052  | 3.861948  |
| 21 | Ce | 5.488686 | -0.002892 | -0.008043 |
| 22 | Ce | 5.501106 | 0.004579  | 3.917386  |
| 23 | Ce | 8.194186 | 1.910185  | 1.905034  |
| 24 | Zr | 8.186645 | 1.820255  | 5.562970  |
| 25 | O  | 1.430436 | 3.823263  | 1.905034  |
| 26 | O  | 1.572593 | 3.844423  | 5.706672  |
| 27 | O  | 4.135936 | 5.736340  | -0.008043 |
| 28 | O  | 4.066905 | 5.687021  | 3.779564  |
| 29 | O  | 4.135936 | 3.823263  | 1.905034  |
| 30 | O  | 4.149028 | 3.845204  | 6.178352  |
| 31 | O  | 1.430436 | 5.736340  | -0.008043 |
| 32 | O  | 1.481724 | 5.760782  | 3.734265  |
| 33 | Ce | 0.077686 | 3.823263  | -0.008043 |
| 34 | Ce | 0.035213 | 3.818989  | 3.918773  |
| 35 | Zr | 2.783186 | 5.736340  | 1.905034  |
| 36 | Ce | 2.729663 | 5.789014  | 5.602102  |
| 37 | O  | 6.841436 | 3.823263  | 1.905034  |
| 38 | O  | 6.756415 | 3.817839  | 5.747182  |
| 39 | O  | 9.546936 | 5.736340  | -0.008043 |
| 40 | O  | 9.545087 | 5.742120  | 3.856453  |
| 41 | O  | 9.546936 | 3.823263  | 1.905034  |
| 42 | O  | 9.380235 | 3.790336  | 5.633123  |
| 43 | O  | 6.841436 | 5.736340  | -0.008043 |
| 44 | O  | 6.823346 | 5.728217  | 3.840093  |
| 45 | Ce | 5.488686 | 3.823263  | -0.008043 |
| 46 | Ce | 5.540418 | 3.825072  | 3.845662  |
| 47 | Ce | 8.194186 | 5.736340  | 1.905034  |
| 48 | Ce | 8.162555 | 5.727404  | 5.685988  |
| 49 | N  | 8.086020 | 5.214989  | 8.385814  |
| 50 | O  | 8.157194 | 1.930979  | 7.642657  |
| 51 | C  | 7.792582 | 4.095403  | 8.523492  |
| 52 | C  | 7.470133 | 2.649503  | 8.588269  |
| 53 | H  | 5.125565 | 3.838773  | 6.418652  |
| 54 | H  | 7.716951 | 2.304883  | 9.615826  |
| 55 | H  | 6.363646 | 2.580111  | 8.484658  |

**HCHO\*+NCO\***

| ATOM |   | X (Angstroms) | Y (Angstroms) | Z (Angstroms) |
|------|---|---------------|---------------|---------------|
| 1    | O | 1.430436      | -0.002892     | 1.905034      |
| 2    | O | 1.490407      | -0.056752     | 5.786738      |
| 3    | O | 4.135936      | 1.910185      | -0.008043     |
| 4    | O | 4.127453      | 1.942067      | 3.891829      |
| 5    | O | 4.135936      | -0.002892     | 1.905034      |
| 6    | O | 4.084346      | -0.038183     | 5.757307      |
| 7    | O | 1.430436      | 1.910185      | -0.008043     |

|    |    |          |           |           |
|----|----|----------|-----------|-----------|
| 8  | O  | 1.426864 | 1.897716  | 3.874256  |
| 9  | Ce | 0.077686 | -0.002892 | -0.008043 |
| 10 | Ce | 0.112082 | -0.016883 | 3.833786  |
| 11 | Ce | 2.783186 | 1.910185  | 1.905034  |
| 12 | Ce | 2.733371 | 1.824682  | 5.660612  |
| 13 | O  | 6.841436 | -0.002892 | 1.905034  |
| 14 | O  | 7.002516 | 0.098933  | 5.770995  |
| 15 | O  | 9.546936 | 1.910185  | -0.008043 |
| 16 | O  | 9.550691 | 1.864415  | 3.874336  |
| 17 | O  | 9.546936 | -0.002892 | 1.905034  |
| 18 | O  | 9.573592 | 0.088085  | 5.797039  |
| 19 | O  | 6.841436 | 1.910185  | -0.008043 |
| 20 | O  | 6.897622 | 2.049017  | 4.032839  |
| 21 | Ce | 5.488686 | -0.002892 | -0.008043 |
| 22 | Ce | 5.503754 | 0.007587  | 3.943721  |
| 23 | Ce | 8.194186 | 1.910185  | 1.905034  |
| 24 | Zr | 8.347017 | 1.750872  | 5.560398  |
| 25 | O  | 1.430436 | 3.823263  | 1.905034  |
| 26 | O  | 1.543006 | 3.858427  | 5.734561  |
| 27 | O  | 4.135936 | 5.736340  | -0.008043 |
| 28 | O  | 4.074604 | 5.700023  | 3.747176  |
| 29 | O  | 4.135936 | 3.823263  | 1.905034  |
| 30 | O  | 4.327118 | 3.809736  | 6.021549  |
| 31 | O  | 1.430436 | 5.736340  | -0.008043 |
| 32 | O  | 1.503829 | 5.734682  | 3.721893  |
| 33 | Ce | 0.077686 | 3.823263  | -0.008043 |
| 34 | Ce | 0.061401 | 3.829085  | 3.885651  |
| 35 | Zr | 2.783186 | 5.736340  | 1.905034  |
| 36 | Ce | 2.757439 | 5.783362  | 5.606157  |
| 37 | O  | 6.841436 | 3.823263  | 1.905034  |
| 38 | O  | 6.732096 | 2.806857  | 7.323087  |
| 39 | O  | 9.546936 | 5.736340  | -0.008043 |
| 40 | O  | 9.594918 | 5.777282  | 3.905296  |
| 41 | O  | 9.546936 | 3.823263  | 1.905034  |
| 42 | O  | 8.997697 | 3.760208  | 5.686806  |
| 43 | O  | 6.841436 | 5.736340  | -0.008043 |
| 44 | O  | 6.817355 | 5.643118  | 4.056868  |
| 45 | Ce | 5.488686 | 3.823263  | -0.008043 |
| 46 | Ce | 5.464149 | 3.829485  | 3.726235  |
| 47 | Ce | 8.194186 | 5.736340  | 1.905034  |
| 48 | Ce | 8.291758 | 5.927329  | 5.768864  |
| 49 | N  | 7.429462 | 5.015220  | 8.070107  |
| 50 | O  | 9.426581 | 1.823060  | 7.872723  |
| 51 | C  | 7.097381 | 3.920157  | 7.721153  |
| 52 | C  | 8.973534 | 1.620739  | 8.987035  |
| 53 | H  | 5.035829 | 3.543041  | 6.648972  |
| 54 | H  | 9.635873 | 1.679694  | 9.878852  |
| 55 | H  | 7.902545 | 1.383112  | 9.149071  |

**TS7-4**

| X (Angstroms) | Y (Angstroms) | Z (Angstroms) |
|---------------|---------------|---------------|
| 1.430436238   | -0.002892170  | 1.905034240   |
| 1.439382523   | -0.034815453  | 5.809615051   |
| 4.135936238   | 1.910185227   | -0.008043157  |
| 4.115867134   | 1.964724432   | 3.933704481   |
| 4.135936238   | -0.002892170  | 1.905034240   |
| 4.011996885   | -0.014515931  | 5.768401539   |
| 1.430436238   | 1.910185227   | -0.008043157  |

|             |              |              |
|-------------|--------------|--------------|
| 1.412770127 | 1.877508691  | 3.890144839  |
| 0.077686238 | -0.002892170 | -0.008043157 |
| 0.022304728 | -0.012552402 | 3.907004608  |
| 2.783186238 | 1.910185227  | 1.905034240  |
| 2.715781155 | 1.838804487  | 5.669073396  |
| 6.841436238 | -0.002892170 | 1.905034240  |
| 6.873678799 | 0.097591076  | 5.656147331  |
| 9.546936238 | 1.910185227  | -0.008043157 |
| 9.508189851 | 1.908227750  | 3.844406734  |
| 9.546936238 | -0.002892170 | 1.905034240  |
| 9.415325764 | 0.066582400  | 5.681862077  |
| 6.841436238 | 1.910185227  | -0.008043157 |
| 6.877501558 | 1.920255094  | 3.825497973  |
| 5.488686238 | -0.002892170 | -0.008043157 |
| 5.500643545 | 0.003746621  | 3.914450222  |
| 8.194186238 | 1.910185227  | 1.905034240  |
| 8.181462047 | 1.887567488  | 5.445343892  |
| 1.430436238 | 3.823262623  | 1.905034240  |
| 1.574390398 | 3.846566166  | 5.702257293  |
| 4.135936238 | 5.736340020  | -0.008043157 |
| 4.060007804 | 5.698316685  | 3.779600747  |
| 4.135936238 | 3.823262623  | 1.905034240  |
| 4.164697539 | 3.873234248  | 6.110449282  |
| 1.430436238 | 5.736340020  | -0.008043157 |
| 1.477295140 | 5.761624415  | 3.740597690  |
| 0.077686238 | 3.823262623  | -0.008043157 |
| 0.048520898 | 3.826270402  | 3.922880930  |
| 2.783186238 | 5.736340020  | 1.905034240  |
| 2.726211335 | 5.798150982  | 5.606009682  |
| 6.841436238 | 3.823262623  | 1.905034240  |
| 6.840543756 | 3.733032489  | 5.680316736  |
| 9.546936238 | 5.736340020  | -0.008043157 |
| 9.546748622 | 5.732914059  | 3.865566618  |
| 9.546936238 | 3.823262623  | 1.905034240  |
| 9.424013373 | 3.757456274  | 5.674079980  |
| 6.841436238 | 5.736340020  | -0.008043157 |
| 6.816664218 | 5.733909535  | 3.864012912  |
| 5.488686238 | 3.823262623  | -0.008043157 |
| 5.537604171 | 3.828012628  | 3.866568451  |
| 8.194186238 | 5.736340020  | 1.905034240  |
| 8.164798083 | 5.725667176  | 5.738458223  |
| 7.583111753 | 5.560085991  | 8.225749086  |
| 8.174669262 | 1.864940632  | 7.763485697  |
| 6.770188529 | 4.745243155  | 8.509768902  |
| 7.248145298 | 1.724556510  | 8.559064944  |
| 5.011506643 | 3.964393399  | 6.602364218  |
| 7.489934237 | 1.643903053  | 9.620762167  |
| 6.218040725 | 1.580834693  | 8.246186408  |

HCHO\*+CN\*

| ATOM |   | X (Angstroms) | Y (Angstroms) | Z (Angstroms) |
|------|---|---------------|---------------|---------------|
| 1    | O | 1.430436      | -0.002892     | 1.905034      |
| 2    | O | 1.438432      | -0.033171     | 5.818553      |
| 3    | O | 4.135936      | 1.910185      | -0.008043     |
| 4    | O | 4.109567      | 1.963901      | 3.932605      |
| 5    | O | 4.135936      | -0.002892     | 1.905034      |
| 6    | O | 4.011782      | 0.000878      | 5.776153      |
| 7    | O | 1.430436      | 1.910185      | -0.008043     |



|    |    |          |           |           |
|----|----|----------|-----------|-----------|
| 8  | O  | 1.406353 | 1.875780  | 3.900376  |
| 9  | Ce | 0.077686 | -0.002892 | -0.008043 |
| 10 | Ce | 0.013553 | -0.016069 | 3.925043  |
| 11 | Ce | 2.783186 | 1.910185  | 1.905034  |
| 12 | Ce | 2.718692 | 1.841689  | 5.672488  |
| 13 | O  | 6.841436 | -0.002892 | 1.905034  |
| 14 | O  | 6.872173 | 0.135484  | 5.627431  |
| 15 | O  | 9.546936 | 1.910185  | -0.008043 |
| 16 | O  | 9.503037 | 1.913241  | 3.841572  |
| 17 | O  | 9.546936 | -0.002892 | 1.905034  |
| 18 | O  | 9.410031 | 0.056789  | 5.702750  |
| 19 | O  | 6.841436 | 1.910185  | -0.008043 |
| 20 | O  | 6.867663 | 1.923161  | 3.790024  |
| 21 | Ce | 5.488686 | -0.002892 | -0.008043 |
| 22 | Ce | 5.501756 | 0.007038  | 3.907303  |
| 23 | Ce | 8.194186 | 1.910185  | 1.905034  |
| 24 | Zr | 8.170760 | 1.923618  | 5.450441  |
| 25 | O  | 1.430436 | 3.823263  | 1.905034  |
| 26 | O  | 1.581244 | 3.849017  | 5.709505  |
| 27 | O  | 4.135936 | 5.736340  | -0.008043 |
| 28 | O  | 4.053282 | 5.704322  | 3.778478  |
| 29 | O  | 4.135936 | 3.823263  | 1.905034  |
| 30 | O  | 4.189133 | 3.878754  | 6.068137  |
| 31 | O  | 1.430436 | 5.736340  | -0.008043 |
| 32 | O  | 1.471424 | 5.761679  | 3.748446  |
| 33 | Ce | 0.077686 | 3.823263  | -0.008043 |
| 34 | Ce | 0.053776 | 3.827437  | 3.936018  |
| 35 | Zr | 2.783186 | 5.736340  | 1.905034  |
| 36 | Ce | 2.738681 | 5.804229  | 5.618911  |
| 37 | O  | 6.841436 | 3.823263  | 1.905034  |
| 38 | O  | 6.894048 | 3.693021  | 5.656065  |
| 39 | O  | 9.546936 | 5.736340  | -0.008043 |
| 40 | O  | 9.542690 | 5.724436  | 3.888685  |
| 41 | O  | 9.546936 | 3.823263  | 1.905034  |
| 42 | O  | 9.451047 | 3.745656  | 5.721680  |
| 43 | O  | 6.841436 | 5.736340  | -0.008043 |
| 44 | O  | 6.813599 | 5.732798  | 3.890916  |
| 45 | Ce | 5.488686 | 3.823263  | -0.008043 |
| 46 | Ce | 5.536235 | 3.824906  | 3.873915  |
| 47 | Ce | 8.194186 | 5.736340  | 1.905034  |
| 48 | Ce | 8.156245 | 5.731276  | 5.736832  |
| 49 | N  | 7.039595 | 5.837058  | 8.037495  |
| 50 | O  | 8.041117 | 1.696364  | 7.821593  |
| 51 | C  | 5.972738 | 5.320455  | 8.117034  |
| 52 | C  | 7.118466 | 1.120183  | 8.393725  |
| 53 | H  | 4.883831 | 4.070430  | 6.755623  |
| 54 | H  | 7.177547 | 0.967858  | 9.489169  |
| 55 | H  | 6.236208 | 0.751556  | 7.843963  |
